# Supplementary material for: Calculation of the Three Partition Coefficients logPow, logKoa and logKaw of Organic Molecules at Standard Conditions at Once by Means of a Generally Applicable Group-Additivity Method
Source: Preprints.org preprint supplement (doi:10.20944/preprints202312.0275.v1), 2023-12-05
Supplement: Supplementary file 1 [file S04. Compounds with Experimental vs. Calculated logPow Values.doc]

| **Molecule name** | **logP exp** | **logP calc** | **Diff** |
| --- | --- | --- | --- |
| (2-Bromoethyl)benzene | 3.09 | 3.15 | -0.06 |
| (2-Pyridyl)acetamide | -0.65 | 0.2 | -0.85 |
| (3-Bromopropyl)benzene | 3.72 | 3.59 | 0.13 |
| (3-Chloropropyl)benzene | 3.55 | 3.51 | 0.04 |
| (9Z)-Octadecenoic acid | 7.64 | 6.79 | 0.85 |
| (Bromomethyl)benzene | 2.92 | 2.71 | 0.21 |
| (Chloromethyl)benzene | 2.3 | 2.63 | -0.33 |
| (E) 4-Decenal | 4.05 | 3.39 | 0.66 |
| (Ethylthio)benzene | 3.2 | 2.98 | 0.22 |
| (L)-Alanine | -2.83 | -2.92 | 0.09 |
| (L)-Cysteine | -2.49 | -2.87 | 0.38 |
| (L)-Histidine | -2.52 | -3.32 | 0.80 |
| (L)-Methionine | -1.87 | -2.03 | 0.16 |
| (S)-(+)-Nirvanol | 1.53 | 1.56 | -0.03 |
| (Trichloromethyl)benzene | 2.92 | 3.9 | -0.98 |
| (Z) 7-Decenal | 3.52 | 3.39 | 0.13 |
| 1 1-Bis(methylthio)-2-nitroethylene | 1.69 | 1.68 | 0.01 |
| 1-(2,4,5-Trichlorophenylhydrazono)-1-cyanoacetic acid ethylester | 5.21 | 5.06 | 0.15 |
| 1-(2,4,5-Trichlorophenylhydrazono)-1-cyanoacetic acid methylester | 5.15 | 4.63 | 0.52 |
| 1-(2,4-Dinitrophenylhydrazono)-1-cyanoacetic acid ethylester | 4.14 | 3.72 | 0.42 |
| 1-(2,4-Dinitrophenylhydrazono)-1-cyanoacetone | 3.41 | 3.22 | 0.19 |
| 1-(2,6-Cl2-4-CF3-phenylhydrazono)-1-cyanoacetic acid methylester | 4.36 | 5.03 | -0.67 |
| 1-(2-CF3-phenylhydrazono)-1-cyanoacetic acid methylester | 3.72 | 3.97 | -0.25 |
| 1-(2-Chlorophenylhydrazono)-1-cyanoacetone | 4.01 | 3.5 | 0.51 |
| 1-(2-Cl-5-CF3-phenylhydrazono)-1-cyanoacetic acid methylester | 4.42 | 4.5 | -0.08 |
| 1-(2-Cl-5-CF3-phenylhydrazono)-1-cyanoacetone | 5.08 | 4.43 | 0.65 |
| 1-(2-Hydroxyphenyl)-1-propanone | 2.54 | 2.26 | 0.28 |
| 1-(2-Methylsulfonyl-4-nitrophenylhydrazono)-1-cyanoacetic acid ethylester | 3.21 | 2.84 | 0.37 |
| 1-(2-NO2-5-CF3-phenylhydrazono)-1-cyanoacetic acid methylester | 3.44 | 4.35 | -0.91 |
| 1-(2-Pyridinyl)ethanone | 0.83 | 0.4 | 0.43 |
| 1-(3,4,5-Trichlorophenylhydrazono)-1-cyanoacetic acid ethylester | 5.03 | 5.06 | -0.03 |
| 1-(3,4,5-Trichlorophenylhydrazono)-1-cyanoacetic acid methylester | 5.22 | 4.63 | 0.59 |
| 1-(3,4-Dichlorophenylhydrazono)-1-cyanoacetic acid ethylester | 4.66 | 4.53 | 0.13 |
| 1-(3,4-Dichlorophenylhydrazono)-1-cyanoacetone | 4.56 | 4.03 | 0.53 |
| 1-(3,5-Dichlorophenylhydrazono)-1-cyanoacetic acid ethylester | 3.82 | 4.53 | -0.71 |
| 1-(3,5-Dichlorophenylhydrazono)-1-cyanoacetic acid methylester | 4.5 | 4.1 | 0.40 |
| 1-(3,5-Dichlorophenylhydrazono)-1-cyanoacetone | 4.68 | 4.03 | 0.65 |
| 1-(3-CF3-phenylhydrazono)-1-cyanoacetic acid methylester | 3.78 | 3.97 | -0.19 |
| 1-(3-Chlorophenylhydrazono)-1-cyanoacetic acid methylester | 3.56 | 3.57 | -0.01 |
| 1-(3-Chlorophenylhydrazono)-1-cyanoacetone | 3.91 | 3.5 | 0.41 |
| 1-(3-Cl-phenylhydrazono)-1-cyanoacetic acid ethylester | 3.94 | 4 | -0.06 |
| 1-(4-Carboxybutyl)benzotriazole | 0.93 | 1.96 | -1.03 |
| 1-(4-CF3SO2-phenylhydrazono)-1-cyanoacetic acid methylester | 4.22 | 3.41 | 0.81 |
| 1-(4-CF3S-phenylhydrazono)-1-cyanoacetic acid methylester | 4.27 | 4.89 | -0.62 |
| 1-(4-Chlorophenylhydrazono)-1-cyanoacetone | 4.13 | 3.5 | 0.63 |
| 1-(4-Cl-2-CF3-phenylhydrazono)-1-cyanoacetic acid methylester | 4.66 | 4.5 | 0.16 |
| 1-(4-Cl-2-CH3-phenylhydrazono)-1-cyanoacetic acid methylester | 4.28 | 3.91 | 0.37 |
| 1-(4-trifluoromethylthiophenylhydrazono)-1-cyanoacetone | 5.04 | 4.82 | 0.22 |
| 1-(Chloromethyl)-2-fluorobenzene | 2.67 | 2.65 | 0.02 |
| 1,1,1,2-Tetrachloroethane | 2.62 | 2.66 | -0.04 |
| 1,1,1,3,3,3-Hexafluoro-2-methoxypropane | 2.91 | 2.35 | 0.56 |
| 1,1,1,3,3,3-Hexafluoro-2-phenyl-2-propanol | 3.41 | 3.1 | 0.31 |
| 1,1,1-Trifluoro-2-propanol | 0.71 | 1 | -0.29 |
| 1,1,2,2-Tetrachloroethane | 2.39 | 2.59 | -0.20 |
| 1,1,2-Trichloroethane | 1.89 | 1.99 | -0.10 |
| 1,10-Decyl dinitrate | 5.56 | 4.95 | 0.61 |
| 1,13-Tridecanedioic acid | 3.99 | 3.72 | 0.27 |
| 1,1-Bis(methylthio)ethylene | 2.04 | 2.26 | -0.22 |
| 1,1-Dichloroacetone | 0.97 | 1.07 | -0.10 |
| 1,1-Dichloroethane | 1.79 | 1.93 | -0.14 |
| 1,1-Dicyano-2,2-bis(methylthio)ethylene | 1.16 | 0.99 | 0.17 |
| 1,1-Diethoxyethane | 0.84 | 1.44 | -0.60 |
| 1,1-Dimethyl-3-phenylurea | 0.98 | 1.52 | -0.54 |
| 1,1-Dimethylpropargylamine | 0.64 | 0.34 | 0.30 |
| 1,2,3,4,5,6,8-Heptachloronaphthalene | 7.46 | 6.94 | 0.52 |
| 1,2,3,4,5,7-Hexachloronaphthalene | 7.58 | 6.41 | 1.17 |
| 1,2,3,4,6,7,8-Heptachlorodibenzofuran | 7.92 | 7.71 | 0.21 |
| 1,2,3,4,6,7-Hexachloronaphthalene | 6.77 | 6.41 | 0.36 |
| 1,2,3,4,6-Pentachloronaphthalene | 7 | 5.88 | 1.12 |
| 1,2,3,4,7-Pentachlorodibenzofuran | 6.53 | 6.65 | -0.12 |
| 1,2,3,4,7-Pentachlorodibenzo-p-dioxin | 6.6 | 6.64 | -0.04 |
| 1,2,3,4-Tetrachlorobenzene | 4.64 | 4.35 | 0.29 |
| 1,2,3,4-Tetrachlorodibenzofuran | 6.17 | 6.12 | 0.05 |
| 1,2,3,4-Tetrachlorodibenzo-p-dioxin | 7.18 | 6.11 | 1.07 |
| 1,2,3,4-Tetrachloronaphthalene | 5.9 | 5.35 | 0.55 |
| 1,2,3,4-Tetrahydronaphthalene | 3.49 | 3.91 | -0.42 |
| 1,2,3,4-Tetrahydroquinoline | 2.29 | 2.39 | -0.10 |
| 1,2,3,5,7,8-Hexachloronaphthalene | 7.33 | 6.41 | 0.92 |
| 1,2,3,5,7-Pentachloronaphthalene | 6.87 | 5.88 | 0.99 |
| 1,2,3,5,8-Pentachloronaphthalene | 6.46 | 5.88 | 0.58 |
| 1,2,3,5-Tetrachlorobenzene | 4.66 | 4.35 | 0.31 |
| 1,2,3,5-Tetrachloronaphthalene | 5.78 | 5.35 | 0.43 |
| 1,2,3,5-Tetramethylbenzene | 4.04 | 3.79 | 0.25 |
| 1,2,3,7,8-Pentachlorodibenzofuran | 6.79 | 6.65 | 0.14 |
| 1,2,3,7,8-Pentachlorodibenzo-p-dioxin | 6.64 | 6.64 | 0.00 |
| 1,2,3,7-Tetrachlorodibenzofuran | 6.04 | 6.12 | -0.08 |
| 1,2,3-Propanetricarboxylic acid | -1.72 | -1.65 | -0.07 |
| 1,2,3-Propanetriol | -1.79 | -1.73 | -0.06 |
| 1,2,3-Tribromobenzene | 4.98 | 4.18 | 0.80 |
| 1,2,3-Trichlorobenzene | 4.14 | 3.82 | 0.32 |
| 1,2,3-Trichloropropane | 1.98 | 2.08 | -0.10 |
| 1,2,3-Triiodobenzene | 5.86 | 5.26 | 0.60 |
| 1,2,3-Trimethoxybenzene | 1.53 | 2.02 | -0.49 |
| 1,2,4,5-Tetrabromobenzene | 5.13 | 4.83 | 0.30 |
| 1,2,4,5-Tetrachlorobenzene | 4.63 | 4.35 | 0.28 |
| 1,2,4,5-Tetrafluorobenzene | 2.44 | 2.31 | 0.13 |
| 1,2,4,5-Tetramethylbenzene | 4 | 3.79 | 0.21 |
| 1,2,4,6,7,9-Hexachlorodibenzo-p-dioxin | 7.85 | 7.17 | 0.68 |
| 1,2,4,7,8-Pentachlorodibenzofuran | 6.26 | 6.65 | -0.39 |
| 1,2,4,7,8-Pentachlorodibenzo-p-dioxin | 6.64 | 6.64 | 0.00 |
| 1,2,4-Tribromobenzene | 4.32 | 4.18 | 0.14 |
| 1,2,4-Trichlorobenzene | 4.02 | 3.82 | 0.20 |
| 1,2,4-Trichlorodibenzo-p-dioxin | 6.34 | 5.58 | 0.76 |
| 1,2,4-Trifluorobenzene | 2.41 | 2.29 | 0.12 |
| 1,2,4-Triiodobenzene | 5.85 | 5.26 | 0.59 |
| 1,2,4-Trimethylbenzene | 3.7 | 3.43 | 0.27 |
| 1,2,7,8-Tetrachlorodibenzofuran | 6.23 | 6.12 | 0.11 |
| 1,2,7,8-Tetrachlorodibenzo-p-dioxin | 6.38 | 6.11 | 0.27 |
| 1,2-Benzenedicarboxylic acid, di-2-propenyl ester | 3.23 | 2.63 | 0.60 |
| 1,2-Bis(dimethylamino)ethane | 0.3 | 0.07 | 0.23 |
| 1,2-Diaminobenzene | 0.15 | 0.41 | -0.26 |
| 1,2-Dibromobenzene | 3.64 | 3.53 | 0.11 |
| 1,2-Dibromoethane | 1.96 | 1.55 | 0.41 |
| 1,2-Dibromohexane | 3.85 | 3.54 | 0.31 |
| 1,2-Dichlorobenzene | 3.38 | 3.29 | 0.09 |
| 1,2-Dichloronaphthalene | 4.66 | 4.29 | 0.37 |
| 1,2-Difluorobenzene | 2.37 | 2.27 | 0.10 |
| 1,2-Dihydroxybenzene | 0.88 | 1.43 | -0.55 |
| 1,2-Dimethyl-3-nitrobenzene | 2.83 | 2.78 | 0.05 |
| 1,2-Dimethyl-4-nitrobenzene | 2.91 | 2.78 | 0.13 |
| 1,2-Dimethylbenzene | 3.12 | 3.07 | 0.05 |
| 1,2-Dimethylindole | 2.82 | 3.13 | -0.31 |
| 1,2-Dimethylnaphthalene | 4.31 | 4.15 | 0.16 |
| 1,2-Dimethylpropylamine | 1.1 | 1 | 0.10 |
| 1,2-Dinitrobenzene | 1.69 | 1.97 | -0.28 |
| 1,2-Diphenylethane | 4.79 | 5.03 | -0.24 |
| 1,2-Diphenylhydrazine | 2.94 | 3.03 | -0.09 |
| 1,2-Ethanediol | -1.36 | -1.13 | -0.23 |
| 1,2-Ethanediol dinitrate | 1.37 | 1.43 | -0.06 |
| 1,3,5,7-Tetrachloronaphthalene | 6.19 | 5.35 | 0.84 |
| 1,3,5,8-Tetrachloronaphthalene | 5.81 | 5.35 | 0.46 |
| 1,3,5-Cycloheptatriene | 2.63 | 2.75 | -0.12 |
| 1,3,5-Tribromobenzene | 4.51 | 4.18 | 0.33 |
| 1,3,5-Trichlorobenzene | 4.19 | 3.82 | 0.37 |
| 1,3,5-Trihydroxybenzene | 0.16 | 1.03 | -0.87 |
| 1,3,5-Triiodobenzene | 5.85 | 5.26 | 0.59 |
| 1,3,5-Trimethylbenzene | 3.42 | 3.43 | -0.01 |
| 1,3,5-Trinitrobenzene | 1.18 | 1.84 | -0.66 |
| 1,3,6,8-Tetrachlorodibenzofuran | 6.37 | 6.12 | 0.25 |
| 1,3,6,8-Tetrachlorodibenzo-p-dioxin | 6.29 | 6.11 | 0.18 |
| 1,3,7,8-Tetrachlorodibenzofuran | 6.39 | 6.12 | 0.27 |
| 1,3,7,9-Tetrachlorodibenzofuran | 6.39 | 6.12 | 0.27 |
| 1,3,7,9-Tetrachlorodibenzo-p-dioxin | 6.39 | 6.11 | 0.28 |
| 1,3,7-Trichlorodibenzo-p-dioxin | 6.31 | 5.58 | 0.73 |
| 1,3,7-Trichloronaphthalene | 5.35 | 4.82 | 0.53 |
| 1,3-Benzodioxole | 2.08 | 2.16 | -0.08 |
| 1,3-Bis(trifluoromethyl)benzene | 3.83 | 4.09 | -0.26 |
| 1,3-Butyl dinitrate | 2.15 | 2.34 | -0.19 |
| 1,3-Cyclohexadiene | 2.47 | 2.55 | -0.08 |
| 1,3-Cyclohexanedione | -0.45 | 0.49 | -0.94 |
| 1,3-Diamino-2-propanol | -2.05 | -2.43 | 0.38 |
| 1,3-Dibromobenzene | 3.75 | 3.53 | 0.22 |
| 1,3-Dichloro-2-propanol | 0.2 | 0.53 | -0.33 |
| 1,3-Dichloro-4-fluorobenzene | 2.91 | 3.31 | -0.40 |
| 1,3-Dichloroacetone | 0.02 | 0.53 | -0.51 |
| 1,3-Dichlorobenzene | 3.53 | 3.29 | 0.24 |
| 1,3-Dichloropropane | 2 | 1.83 | 0.17 |
| 1,3-Difluorobenzene | 2.21 | 2.27 | -0.06 |
| 1,3-Dihydroxybenzene | 0.8 | 1.43 | -0.63 |
| 1,3-Dimethoxybenzene | 2.21 | 2.09 | 0.12 |
| 1,3-Dimethylbenzene | 3.2 | 3.07 | 0.13 |
| 1,3-Dimethylimidazolium chloride | 1.9 | 2.16 | -0.26 |
| 1,3-Dimethylimidazolium methosulfate | -0.41 | -0.47 | 0.06 |
| 1,3-Dimethylnaphthalene | 4.42 | 4.15 | 0.27 |
| 1,3-Dimethyluracil | 0 | -0.89 | 0.89 |
| 1,3-Dinitrobenzene | 1.49 | 1.97 | -0.48 |
| 1,3-Dithiolane | 1.58 | 1.29 | 0.29 |
| 1,3-Propanediamine | -1.43 | -1.13 | -0.30 |
| 1,4,5-Trimethylnaphthalene | 4.9 | 4.51 | 0.39 |
| 1,4-Benzoquinone | 0.2 | -0.03 | 0.23 |
| 1,4-Butyl dinitrate | 2.17 | 2.31 | -0.14 |
| 1,4-Cyclohexadiene | 2.3 | 2.69 | -0.39 |
| 1,4-Cyclohexanedione | -0.52 | 0.49 | -1.01 |
| 1,4-Diaminobenzene | -0.3 | 0.41 | -0.71 |
| 1,4-Dibromo-2,3-butanedione | -0.86 | -0.17 | -0.69 |
| 1,4-Dibromo-2-butene | 2.03 | 2.03 | 0.00 |
| 1,4-Dibromobenzene | 3.79 | 3.53 | 0.26 |
| 1,4-Dichlorobenzene | 3.44 | 3.29 | 0.15 |
| 1,4-Dichlorobutane | 2.81 | 2.27 | 0.54 |
| 1,4-Dichloronaphthalene | 4.66 | 4.29 | 0.37 |
| 1,4-Difluorobenzene | 2.13 | 2.27 | -0.14 |
| 1,4-Dihydroxybenzene | 0.59 | 1.43 | -0.84 |
| 1,4-Diiodobenzene | 4.11 | 4.25 | -0.14 |
| 1,4-Dimethoxy-2,3,5,6-tetrachlorocyclohexane | 3.15 | 2.45 | 0.70 |
| 1,4-Dimethylbenzene | 3.15 | 3.07 | 0.08 |
| 1,4-Dimethylnaphthalene | 4.37 | 4.15 | 0.22 |
| 1,4-Dimethylquinoxalin-2,3-dione | 0.08 | -0.03 | 0.11 |
| 1,4-Dinitrobenzene | 1.49 | 1.97 | -0.48 |
| 1,4-Dioxane | -0.27 | -0.39 | 0.12 |
| 1,4-Dioxatetralin | 2.01 | 1.99 | 0.02 |
| 1,4-Di-t-butylbenzene | 5.63 | 5.35 | 0.28 |
| 1,4-Naphthoquinone | 1.78 | 1.13 | 0.65 |
| 1,4-Pentadiene | 2.48 | 2.25 | 0.23 |
| 1,4-Pentyl dinitrate | 2.88 | 2.78 | 0.10 |
| 1,5-Cyclooctadiene | 3.55 | 3.33 | 0.22 |
| 1,5-Dichloropentane | 3.3 | 2.71 | 0.59 |
| 1,5-Dimethylnaphthalene | 4.38 | 4.15 | 0.23 |
| 1,5-Hexadiene | 2.45 | 2.71 | -0.26 |
| 1,5-Hexyl dinitrate | 3.25 | 3.22 | 0.03 |
| 1,5-Pentanediol | 0.3 | 0.19 | 0.11 |
| 1,5-Pentyl dinitrate | 2.64 | 2.75 | -0.11 |
| 1,6-Dibromohexane | 3.57 | 3.31 | 0.26 |
| 1,6-Hexanedioic acid | 0.08 | 0.64 | -0.56 |
| 1,6-Hexanedithiol | 2.71 | 3.13 | -0.42 |
| 1,6-Hexyl dinitrate | 3.19 | 3.19 | 0.00 |
| 1,7-Dimethylnaphthalene | 4.44 | 4.15 | 0.29 |
| 1,7-Heptyl dinitrate | 3.81 | 3.63 | 0.18 |
| 1,7-Phenanthroline | 2.51 | 2.33 | 0.18 |
| 1,8-Dichloronaphthalene | 4.19 | 4.29 | -0.10 |
| 1,8-Dimethylnaphthalene | 4.26 | 4.15 | 0.11 |
| 1,8-Octanedithiol | 3.77 | 4.01 | -0.24 |
| 1,8-Octyl dinitrate | 4.4 | 4.07 | 0.33 |
| 11-Deoxycorticosterone | 2.88 | 3.41 | -0.53 |
| 17a-Hydroxyprogesterone | 3.17 | 3.37 | -0.20 |
| 17a-Methyltestosterone | 3.36 | 4.23 | -0.87 |
| 1-Acetoxy-2,3,4,5,6-pentachlorocyclohexane | 3.4 | 3.45 | -0.05 |
| 1-Adamantanol | 2.14 | 2.12 | 0.02 |
| 1-Amino-3-methoxypropane | -1.02 | -0.28 | -0.74 |
| 1-Aminoacridine | 2.47 | 2.77 | -0.30 |
| 1-Aminoadamantane | 2.44 | 2.18 | 0.26 |
| 1-Azabicyclo[2.2.2]octane | 1.2 | 1.47 | -0.27 |
| 1-Benzyl-3-methylimidazolium chloride | 2.99 | 4.01 | -1.02 |
| 1-Benzyl-3-methylimidazolium tetrafluoroborate | 4.8 | 5.62 | -0.82 |
| 1-Benzylbenzimidazole | 3.24 | 3 | 0.24 |
| 1-Benzylimidazole | 1.6 | 1.06 | 0.54 |
| 1-Bromo-2-propanol | 0.28 | 0.55 | -0.27 |
| 1-Bromo-3-chloropropane | 2.18 | 1.91 | 0.27 |
| 1-Bromobutane | 2.75 | 2.29 | 0.46 |
| 1-Bromooctane | 4.89 | 4.05 | 0.84 |
| 1-Bromopentane | 3.37 | 2.73 | 0.64 |
| 1-Bromopinacolone | 1.28 | 1.63 | -0.35 |
| 1-Bromopropane | 2.1 | 1.85 | 0.25 |
| 1-Butanethiol | 2.28 | 2.2 | 0.08 |
| 1-Butanol | 0.79 | 0.82 | -0.03 |
| 1-Butene | 1.59 | 2.01 | -0.42 |
| 1-Butyl-3-methylimidazolium bromide | 3.59 | 3.59 | 0.00 |
| 1-Butyl-3-methylimidazolium chloride | 3.25 | 3.59 | -0.34 |
| 1-Butyl-3-methylimidazolium iodide | 3.79 | 3.59 | 0.20 |
| 1-Butyl-3-methylimidazolium methosulfate | 0.94 | 0.96 | -0.02 |
| 1-Butyl-3-methylimidazolium tetrafluoroborate | 5.06 | 5.2 | -0.14 |
| 1-Butyl-3-methylpyridinium tetrafluoroborate | 4.77 | 4.78 | -0.01 |
| 1-Butyl-4-methylpyridinium tetrafluoroborate | 4.98 | 4.78 | 0.20 |
| 1-Butylamine | 0.97 | 0.73 | 0.24 |
| 1-Butylpyridinium chloride | 2.78 | 2.83 | -0.05 |
| 1-Butylpyridinium tetrafluoroborate | 4.59 | 4.44 | 0.15 |
| 1-Butyne | 1.44 | 1.45 | -0.01 |
| 1-Chloro-2-propanol | 0.14 | 0.47 | -0.33 |
| 1-Chlorobutane | 2.55 | 2.21 | 0.34 |
| 1-Chlorodibenzo-p-dioxin | 5.05 | 4.52 | 0.53 |
| 1-Chloroheptane | 4.15 | 3.53 | 0.62 |
| 1-Chloronaphthalene | 4.24 | 3.76 | 0.48 |
| 1-Chloropentane | 2.73 | 2.65 | 0.08 |
| 1-Chloropropane | 2.04 | 1.77 | 0.27 |
| 1-Decyl-3-methylimidazolium bromide | 7 | 6.23 | 0.77 |
| 1-Decyl-3-methylimidazolium tetrafluoroborate | 8.48 | 7.84 | 0.64 |
| 1-Dimethylamino-2-propyne | -0.01 | 0.33 | -0.34 |
| 1-Dodecyl-3-methylimidazolium bromide | 7 | 7.11 | -0.11 |
| 1-Ethoxy-butane | 2.03 | 2.01 | 0.02 |
| 1-Ethyl-1-hydroxyurea | -0.1 | -0.02 | -0.08 |
| 1-Ethyl-3-methylimidazolium bromide | 2.66 | 2.71 | -0.05 |
| 1-Ethyl-3-methylimidazolium chloride | 2.33 | 2.71 | -0.38 |
| 1-Ethyl-3-methylimidazolium ethosulfate | 0.44 | 0.51 | -0.07 |
| 1-Ethyl-3-methylimidazolium tetrafluoroborate | 4.14 | 4.32 | -0.18 |
| 1-Ethylnaphthalene | 4.39 | 4.25 | 0.14 |
| 1-Fluoropentane | 2.33 | 2.03 | 0.30 |
| 1-Heptanethiol | 3.82 | 3.52 | 0.30 |
| 1-Heptanol | 2.57 | 2.14 | 0.43 |
| 1-Heptene | 3.99 | 3.39 | 0.60 |
| 1-Heptyn-3-ol | 1.73 | 1.39 | 0.34 |
| 1-Hexanol | 2.03 | 1.7 | 0.33 |
| 1-Hexen-3-ol | 1.18 | 1.51 | -0.33 |
| 1-Hexen-5-one | 1.02 | 1.51 | -0.49 |
| 1-Hexene | 3.39 | 2.93 | 0.46 |
| 1-Hexyl-3-methylimidazolium bromide | 4.73 | 4.47 | 0.26 |
| 1-Hexyl-3-methylimidazolium chloride | 4.39 | 4.47 | -0.08 |
| 1-Hexyl-3-methylimidazolium iodide | 4.93 | 4.47 | 0.46 |
| 1-Hexyl-3-methylimidazolium tetrafluoroborate | 6.2 | 6.08 | 0.12 |
| 1-Hexyn-3-ol | 1.2 | 0.95 | 0.25 |
| 1-Hexyne | 2.73 | 2.37 | 0.36 |
| 1H-Indazole | 1.82 | 2.6 | -0.78 |
| 1H-Indene-1,3(2H)-dione | 0.61 | 1.09 | -0.48 |
| 1H-Purine | -0.37 | -0.28 | -0.09 |
| 1H-Pyrazole | 0.13 | 1.05 | -0.92 |
| 1-Hydroxy-2,3,4,5,6-pentachlorocyclohexane | 2.54 | 2.48 | 0.06 |
| 1-Iodobutane | 3.06 | 2.96 | 0.10 |
| 1-Iodoheptane | 4.7 | 4.28 | 0.42 |
| 1-Iodopentane | 3.56 | 3.4 | 0.16 |
| 1-Isopropylbenzotriazole | 1.98 | 2.19 | -0.21 |
| 1-Methoxy-2-propanamine | -0.36 | -0.29 | -0.07 |
| 1-Methoxy-3-phenylpropane | 2.7 | 2.88 | -0.18 |
| 1-Methyl-1-hydroxypentachlorocyclohexane | 2.94 | 2.69 | 0.25 |
| 1-Methyl-1-hydroxyurea | -0.46 | -0.57 | 0.11 |
| 1-Methyl-4-isopropylcyclohexene | 4.57 | 4.16 | 0.41 |
| 1-Methyl-4-phenylquinazolin-2-one | 1.79 | 2.53 | -0.74 |
| 1-Methylbenzotriazole | 1.13 | 1.21 | -0.08 |
| 1-Methylfluorene | 4.97 | 5.07 | -0.10 |
| 1-Methylisatin | 0.58 | 0.31 | 0.27 |
| 1-Methylnaphthalene | 3.87 | 3.79 | 0.08 |
| 1-Methylphenanthrene | 5.08 | 4.87 | 0.21 |
| 1-Methyluracil | -1.2 | -0.78 | -0.42 |
| 1-Naphthalenecarboxylic acid | 3.1 | 2.45 | 0.65 |
| 1-Naphthol | 2.84 | 2.83 | 0.01 |
| 1-Naphthyl acetate | 2.78 | 3.18 | -0.40 |
| 1-Naphthylamine | 2.25 | 2.32 | -0.07 |
| 1-Naphthylisothiocyanate | 4.34 | 4.18 | 0.16 |
| 1-Naphthylmethylisothiocyanate | 4.42 | 4.53 | -0.11 |
| 1-Nitrobutane | 1.47 | 1.29 | 0.18 |
| 1-Nitronaphthalene | 3.19 | 3.1 | 0.09 |
| 1-Nitropentane | 2.01 | 1.73 | 0.28 |
| 1-Nitropropane | 0.65 | 0.85 | -0.20 |
| 1-Nonanol | 3.77 | 3.02 | 0.75 |
| 1-Nonene | 5.15 | 4.31 | 0.84 |
| 1-Octanol | 3 | 2.58 | 0.42 |
| 1-Octyl-3-methylimidazolium bromide | 5.87 | 5.35 | 0.52 |
| 1-Octyl-3-methylimidazolium chloride | 5.53 | 5.35 | 0.18 |
| 1-Octyl-3-methylimidazolium tetrafluoroborate | 7.34 | 6.96 | 0.38 |
| 1-Pentanethiol | 2.74 | 2.64 | 0.10 |
| 1-Pentanol | 1.4 | 1.26 | 0.14 |
| 1-Penten-3-ol | 0.65 | 1.07 | -0.42 |
| 1-Pentylbenzimidazole | 3.63 | 3.02 | 0.61 |
| 1-Pentylbenzotriazole | 3.22 | 3.08 | 0.14 |
| 1-Pentyn-3-ol | 0.67 | 0.51 | 0.16 |
| 1-Pentyne | 1.98 | 1.91 | 0.07 |
| 1-Phenethylisothiocyanate | 3.46 | 3.96 | -0.50 |
| 1-Phenyl-1,3-butanedione (enol form) | 2.52 | 2.38 | 0.14 |
| 1-Phenyl-1-propanone | 2.19 | 2.15 | 0.04 |
| 1-Phenyl-2-acetamidocyclopropane | 1.43 | 2 | -0.57 |
| 1-Phenyl-2-butanol | 2.02 | 2.59 | -0.57 |
| 1-Phenyl-2-nitropropene | 2.52 | 2.52 | 0.00 |
| 1-Phenylhydrazono-1-cyanoacetic acid methylester | 2.59 | 3.04 | -0.45 |
| 1-Phenyltetrazole | 1.09 | 0.8 | 0.29 |
| 1-Propanethiol | 1.81 | 1.76 | 0.05 |
| 1-Propanol | 0.34 | 0.38 | -0.04 |
| 1-Propyl-3-methylimidazolium iodide | 3.22 | 3.15 | 0.07 |
| 1-Propyl-3-methylimidazolium tetrafluoroborate | 4.33 | 4.76 | -0.43 |
| 1-Propylamine | 0.48 | 0.29 | 0.19 |
| 1-Propylbenzotriazole | 2.13 | 2.2 | -0.07 |
| 1-Propylpyridinium chloride | 2.21 | 2.39 | -0.18 |
| 1-s-Butylbenzotriazole | 2.31 | 2.48 | -0.17 |
| 1-Undecanol | 4.54 | 3.9 | 0.64 |
| 2-(2,4,6-Tribromophenoxy)ethanol | 3.42 | 3.21 | 0.21 |
| 2-(2,4-Dichlorophenoxy)propanoic acid | 3.43 | 3 | 0.43 |
| 2-(2-Pyridyl)ethanol | 0.12 | 0.37 | -0.25 |
| 2-(2-Pyridyl)ethylamine | 0.08 | 0.28 | -0.20 |
| 2-(3-Hydroxypropyl)benzimidazole | 1.25 | 1.38 | -0.13 |
| 2-(3-Pyridyl)ethanol | 0.12 | 0.33 | -0.21 |
| 2-(3-Pyridyl)ethylamine | 0 | 0.24 | -0.24 |
| 2-(4-Pyridyl)ethanol | 0.1 | 0.33 | -0.23 |
| 2-(6-Methoxynaphthalen-2-yl)propanoic acid | 3.18 | 3.1 | 0.08 |
| 2-(Ethylamino)ethanol | -0.46 | -0.52 | 0.06 |
| 2-(Hydroxymethyl)-1-methyl-5-nitroimidazole | -0.03 | -0.46 | 0.43 |
| 2-(Methylthio)aniline | 1.2 | 1.79 | -0.59 |
| 2-(Methylthio)phenyl N-methylcarbamate | 1.51 | 1.92 | -0.41 |
| 2-(Methylthio)quinoxaline | 2.79 | 2.3 | 0.49 |
| 2-(Phenoxymethyl)oxirane | 1.6 | 1.96 | -0.36 |
| 2-(Propylamino)ethanol | 0.07 | -0.08 | 0.15 |
| 2-(t-Butylamino)ethanol | 0.41 | 0.31 | 0.10 |
| 2,2,2-Trichloroethanol | 1.42 | 1.27 | 0.15 |
| 2,2,2-Trifluoroethanol | 0.41 | 0.53 | -0.12 |
| 2,2,2-Trifluoroethylacetate | 1.18 | 1.5 | -0.32 |
| 2,2',3,3',4,4',5,5',6-Nonachlorobiphenyl | 7.51 | 8.64 | -1.13 |
| 2,2',3,3',4,4',5,5',6-Nonachlorodiphenyl ether | 8.07 | 8.63 | -0.56 |
| 2,2',3,3',4,4',5,5'-Octachlorobiphenyl | 7.65 | 8.11 | -0.46 |
| 2,2',3,3',4,4',5,5'-Octachlorodiphenyl ether | 7.78 | 8.1 | -0.32 |
| 2,2',3,3',4,4',5,6,6'-Nonachlorobiphenyl | 7.88 | 8.64 | -0.76 |
| 2,2',3,3',4,4',5,6'-Octachlorobiphenyl | 7.43 | 8.11 | -0.68 |
| 2,2',3,3',4,4',5-Heptachlorobiphenyl | 6.96 | 7.58 | -0.62 |
| 2,2',3,3',4,4',6,6'-Octachlorobiphenyl | 7.21 | 8.11 | -0.90 |
| 2,2',3,3',4,4',6-Heptachlorobiphenyl | 6.68 | 7.58 | -0.90 |
| 2,2',3,3',4,4'-Hexachlorobiphenyl | 7.32 | 7.05 | 0.27 |
| 2,2',3,3',4,4'-Hexachlorodiphenyl ether | 6.82 | 7.04 | -0.22 |
| 2,2',3,3',4,5,5',6'-Octachlorobiphenyl | 7.21 | 8.11 | -0.90 |
| 2,2',3,3',4,5,5',6-Octachlorobiphenyl | 7.43 | 8.11 | -0.68 |
| 2,2',3,3',4,5,5'-Heptachlorobiphenyl | 7.03 | 7.58 | -0.55 |
| 2,2',3,3',4,5,6,6'-Octachlorobiphenyl | 7.35 | 8.11 | -0.76 |
| 2,2',3,3',4,5',6'-Heptachlorobiphenyl | 6.73 | 7.58 | -0.85 |
| 2,2',3,3',4,5',6-Heptachlorobiphenyl | 6.92 | 7.58 | -0.66 |
| 2,2',3,3',4,5'-Hexachlorobiphenyl | 7.39 | 7.05 | 0.34 |
| 2,2',3,3',4,6,6'-Heptachlorobiphenyl | 6.65 | 7.58 | -0.93 |
| 2,2',3,3',4,6'-Hexachlorobiphenyl | 7.04 | 7.05 | -0.01 |
| 2,2',3,3',4,6-Hexachlorobiphenyl | 6.82 | 7.05 | -0.23 |
| 2,2',3,3',4-Pentabromodiphenyl ether | 6.97 | 7.11 | -0.14 |
| 2,2',3,3',5,5',6,6'-Octachlorobiphenyl | 7.73 | 8.11 | -0.38 |
| 2,2',3,3',5,5',6-Heptachlorobiphenyl | 6.85 | 7.58 | -0.73 |
| 2,2',3,3',5,5'-Hexachlorobiphenyl | 7.07 | 7.05 | 0.02 |
| 2,2',3,3',5,6,6'-Heptachlorobiphenyl | 6.41 | 7.58 | -1.17 |
| 2,2',3,3',5,6'-Hexachlorobiphenyl | 7.15 | 7.05 | 0.10 |
| 2,2',3,3',5,6-Hexachlorobiphenyl | 6.91 | 7.05 | -0.14 |
| 2,2',3,3',6,6'-Hexachlorobiphenyl | 7.12 | 7.05 | 0.07 |
| 2,2',3,3',6-Pentachlorobiphenyl | 6.04 | 6.52 | -0.48 |
| 2,2',3,3'-Tetrachlorobiphenyl | 6.18 | 5.99 | 0.19 |
| 2,2',3,4,4',5,5',6-Octachlorobiphenyl | 7.21 | 8.11 | -0.90 |
| 2,2',3,4,4',5,5'-Heptachlorobiphenyl | 6.89 | 7.58 | -0.69 |
| 2,2',3,4,4',5,5'-Heptachlorodiphenyl ether | 7.46 | 7.57 | -0.11 |
| 2,2',3,4,4',5,6,6'-Octachlorobiphenyl | 7.48 | 8.11 | -0.63 |
| 2,2',3,4,4',5',6-Heptachlorobiphenyl | 6.92 | 7.58 | -0.66 |
| 2,2',3,4,4',5,6'-Heptachlorobiphenyl | 6.92 | 7.58 | -0.66 |
| 2,2',3,4,4',5,6-Heptachlorobiphenyl | 7.13 | 7.58 | -0.45 |
| 2,2',3,4,4',5,6'-Heptachlorodiphenyl ether | 7.5 | 7.57 | -0.07 |
| 2,2',3,4,4',5'-Hexachlorobiphenyl | 7.25 | 7.05 | 0.20 |
| 2,2',3,4,4',5-Hexachlorobiphenyl | 7.25 | 7.05 | 0.20 |
| 2,2',3,4,4',5'-Hexachlorodiphenyl ether | 7.01 | 7.04 | -0.03 |
| 2,2',3,4,4',5-Hexachlorodiphenyl ether | 7.11 | 7.04 | 0.07 |
| 2,2',3,4,4',6,6'-Heptachlorobiphenyl | 6.65 | 7.58 | -0.93 |
| 2,2',3,4,4',6'-Hexachlorobiphenyl | 6.97 | 7.05 | -0.08 |
| 2,2',3,4,4',6-Hexachlorobiphenyl | 6.95 | 7.05 | -0.10 |
| 2,2',3,4,4',6'-Hexachlorodiphenyl ether | 6.76 | 7.04 | -0.28 |
| 2,2',3,4,4'-Pentabromodiphenyl ether | 7.03 | 7.11 | -0.08 |
| 2,2',3,4,4'-Pentachlorobiphenyl | 6.61 | 6.52 | 0.09 |
| 2,2',3,4,4'-Pentachlorodiphenyl ether | 6.28 | 6.51 | -0.23 |
| 2,2',3,4,5,5',6-Heptachlorobiphenyl | 6.99 | 7.58 | -0.59 |
| 2,2',3,4',5,5',6-Heptachlorobiphenyl | 6.84 | 7.58 | -0.74 |
| 2,2',3,4,5,5'-Hexachlorobiphenyl | 7.19 | 7.05 | 0.14 |
| 2,2',3,4',5,5'-Hexachlorobiphenyl | 7.12 | 7.05 | 0.07 |
| 2,2',3,4',5,6,6'-Heptachlorobiphenyl | 6.78 | 7.58 | -0.80 |
| 2,2',3,4,5,6-Hexachlorobiphenyl | 6.97 | 7.05 | -0.08 |
| 2,2',3,4',5,6-Hexachlorobiphenyl | 6.93 | 7.05 | -0.12 |
| 2,2',3,4,5',6-Hexachlorobiphenyl | 6.79 | 7.05 | -0.26 |
| 2,2',3,4',5',6-Hexachlorobiphenyl | 6.86 | 7.05 | -0.19 |
| 2,2',3,4',5,6'-Hexachlorobiphenyl | 6.87 | 7.05 | -0.18 |
| 2,2',3,4',5-Pentachlorobiphenyl | 6.32 | 6.52 | -0.20 |
| 2,2',3,4,5'-Pentachlorobiphenyl | 6.37 | 6.52 | -0.15 |
| 2,2',3,4',5'-Pentachlorobiphenyl | 6.67 | 6.52 | 0.15 |
| 2,2',3,4,6,6'-Hexachlorobiphenyl | 6.71 | 7.05 | -0.34 |
| 2,2',3,4',6,6'-Hexachlorobiphenyl | 6.75 | 7.05 | -0.30 |
| 2,2',3,4',6-Pentachlorobiphenyl | 6.31 | 6.52 | -0.21 |
| 2,2',3,4'-Tetrachlorobiphenyl | 5.72 | 5.99 | -0.27 |
| 2,2',3,4-Tetrachlorobiphenyl | 6.11 | 5.99 | 0.12 |
| 2,2',3,5,5',6-Hexachlorobiphenyl | 6.85 | 7.05 | -0.20 |
| 2,2',3,5,5'-Pentachlorobiphenyl | 6.97 | 6.52 | 0.45 |
| 2,2',3,5,6,6'-Hexachlorobiphenyl | 6.51 | 7.05 | -0.54 |
| 2,2',3,5,6-Pentachlorobiphenyl | 6.06 | 6.52 | -0.46 |
| 2,2',3,5',6-Pentachlorobiphenyl | 5.92 | 6.52 | -0.60 |
| 2,2',3,5'-Tetrachlorobiphenyl | 5.81 | 5.99 | -0.18 |
| 2,2',3-Trichlorobiphenyl | 5.31 | 5.46 | -0.15 |
| 2,2',4,4',5,5'-Hexabromodiphenyl ether | 7.62 | 7.76 | -0.14 |
| 2,2',4,4',5,5'-Hexachlorobiphenyl | 7.5 | 7.05 | 0.45 |
| 2,2',4,4',5,5'-Hexachlorodiphenyl ether | 6.72 | 7.04 | -0.32 |
| 2,2',4,4',5,6'-Hexabromodiphenyl ether | 7.39 | 7.76 | -0.37 |
| 2,2',4,4',5,6'-Hexachlorobiphenyl | 6.89 | 7.05 | -0.16 |
| 2,2',4,4',5,6'-Hexachlorodiphenyl ether | 6.49 | 7.04 | -0.55 |
| 2,2',4,4',5-Pentabromodiphenyl ether | 6.97 | 7.11 | -0.14 |
| 2,2',4,4',5-Pentachlorobiphenyl | 7.21 | 6.52 | 0.69 |
| 2,2',4,4',5-Pentachlorodiphenyl ether | 6.38 | 6.51 | -0.13 |
| 2,2',4,4',6,6'-Hexabromobiphenyl | 7.2 | 7.77 | -0.57 |
| 2,2',4,4',6,6'-Hexachlorobiphenyl | 7.29 | 7.05 | 0.24 |
| 2,2',4,4',6-Pentabromodiphenyl ether | 6.86 | 7.11 | -0.25 |
| 2,2',4,4',6-Pentachlorobiphenyl | 6.23 | 6.52 | -0.29 |
| 2,2',4,4',6-Pentachlorodiphenyl ether | 6.11 | 6.51 | -0.40 |
| 2,2',4,4'-Tetrabromodiphenyl ether | 6.39 | 6.46 | -0.07 |
| 2,2',4,4'-Tetrachlorobiphenyl | 6.29 | 5.99 | 0.30 |
| 2,2',4,4'-Tetrachlorodiphenyl ether | 5.95 | 5.98 | -0.03 |
| 2,2',4,5,5'-PCB | 6.5 | 6.52 | -0.02 |
| 2,2',4,5,5'-Pentabromobiphenyl | 7.1 | 7.12 | -0.02 |
| 2,2',4,5,5'-Pentachlorodiphenyl ether | 6.22 | 6.51 | -0.29 |
| 2,2',4,5',6-Pentachlorobiphenyl | 6.11 | 6.52 | -0.41 |
| 2,2',4,5'-Tetrachlorobiphenyl | 6.38 | 5.99 | 0.39 |
| 2,2',4,6'-Tetrachlorobiphenyl | 5.51 | 5.99 | -0.48 |
| 2,2',4,6-Tetrachlorobiphenyl | 5.75 | 5.99 | -0.24 |
| 2,2',4-Tribromodiphenyl ether | 5.58 | 5.81 | -0.23 |
| 2,2',4-Trichlorobiphenyl | 5.76 | 5.46 | 0.30 |
| 2,2',5,5'-Tetrabromobiphenyl | 6.5 | 6.47 | 0.03 |
| 2,2',5,5'-Tetrachlorobiphenyl | 6.09 | 5.99 | 0.10 |
| 2,2,5,5-Tetramethyltetrahydrofuran | 2.06 | 2.13 | -0.07 |
| 2,2',5,6'-Tetrachlorobiphenyl | 5.98 | 5.99 | -0.01 |
| 2,2',5-Trichlorobiphenyl | 5.6 | 5.46 | 0.14 |
| 2,2',6,6'-Tetrachlorobiphenyl | 5.94 | 5.99 | -0.05 |
| 2,2,6,6-Tetramethyl-N-nitrosopiperidine | 2.49 | 2.46 | 0.03 |
| 2,2',6-Trichlorobiphenyl | 5.48 | 5.46 | 0.02 |
| 2,2'-Dichlorobiphenyl | 4.97 | 4.93 | 0.04 |
| 2,2'-Dichlorodiisopropyl ether | 2.48 | 2.19 | 0.29 |
| 2,2-Dichloroethanol | 0.37 | 0.6 | -0.23 |
| 2,2-Dichloropropionic acid | 0.78 | 0.99 | -0.21 |
| 2,2-Dimethylpropane | 3.11 | 2.8 | 0.31 |
| 2,2-Diphenylpropionic acid | 2.69 | 3.83 | -1.14 |
| 2,3,3',4,4',5,5',6-Octachlorobiphenyl | 7.62 | 8.11 | -0.49 |
| 2',3,3',4,4',5,6-Heptabromodiphenyl ether | 8.36 | 8.41 | -0.05 |
| 2,3,3',4,4',5,6-Heptachlorobiphenyl | 7.08 | 7.58 | -0.50 |
| 2,3,3',4,4',5',6-Heptachlorobiphenyl | 7.21 | 7.58 | -0.37 |
| 2,3,3',4,4',5'-Hexabromodiphenyl ether | 7.91 | 7.76 | 0.15 |
| 2,3,3',4,4',5-Hexabromodiphenyl ether | 7.93 | 7.76 | 0.17 |
| 2,3,3',4,4',5'-Hexachlorobiphenyl | 7.6 | 7.05 | 0.55 |
| 2,3,3',4,4',5-Hexachlorobiphenyl | 7.57 | 7.05 | 0.52 |
| 2,3,3',4,4',6-Hexachlorobiphenyl | 7.25 | 7.05 | 0.20 |
| 2,3,3',4,4'-Pentachlorobiphenyl | 6.65 | 6.52 | 0.13 |
| 2,3,3',4,4'-Pentachlorodiphenyl ether | 6.51 | 6.51 | 0.00 |
| 2,3,3',4,5,5',6-Heptachlorobiphenyl | 7.21 | 7.58 | -0.37 |
| 2,3,3',4',5,5',6-Heptachlorobiphenyl | 7.21 | 7.58 | -0.37 |
| 2,3,3',4,5,5'-Hexachlorobiphenyl | 7.43 | 7.05 | 0.38 |
| 2,3,3',4',5,5'-Hexachlorobiphenyl | 7.1 | 7.05 | 0.05 |
| 2,3,3',4,5,6-Hexachlorobiphenyl | 7.3 | 7.05 | 0.25 |
| 2,3,3',4',5,6-Hexachlorobiphenyl | 7.25 | 7.05 | 0.20 |
| 2,3,3',4,5',6-Hexachlorobiphenyl | 7.1 | 7.05 | 0.05 |
| 2,3,3',4',5',6-Hexachlorobiphenyl | 7.2 | 7.05 | 0.15 |
| 2,3,3',4,5-Pentachlorobiphenyl | 6.92 | 6.52 | 0.40 |
| 2,3,3',4,6-Pentachlorobiphenyl | 6.51 | 6.52 | -0.01 |
| 2,3,3',4',6-Pentachlorobiphenyl | 6.2 | 6.52 | -0.32 |
| 2,3,3',4'-Tetrachlorobiphenyl | 5.85 | 5.99 | -0.14 |
| 2,3,3',5,5',6-Hexachlorobiphenyl | 7.37 | 7.05 | 0.32 |
| 2,3,3',5,6-Pentachlorobiphenyl | 6.41 | 6.52 | -0.11 |
| 2,3,3',5',6-Pentachlorobiphenyl | 6.45 | 6.52 | -0.07 |
| 2,3,3',5'-Tetrachlorobiphenyl | 6.17 | 5.99 | 0.18 |
| 2,3,3'-Trichlorobiphenyl | 5.57 | 5.46 | 0.11 |
| 2,3',4,4',5,5'-Hexachlorobiphenyl | 7.5 | 7.05 | 0.45 |
| 2,3',4,4',5,5'-Hexachlorodiphenyl ether | 7.11 | 7.04 | 0.07 |
| 2,3,4,4',5,6-Hexachlorobiphenyl | 7.31 | 7.05 | 0.26 |
| 2,3',4,4',5',6-Hexachlorobiphenyl | 7.17 | 7.05 | 0.12 |
| 2,3',4,4',5'-Pentachlorobiphenyl | 6.64 | 6.52 | 0.12 |
| 2,3',4,4',5-Pentachlorobiphenyl | 6.57 | 6.52 | 0.05 |
| 2,3,4,4',6-Pentabromodiphenyl ether | 6.97 | 7.11 | -0.14 |
| 2,3,4,4',6-Pentachlorobiphenyl | 6.44 | 6.52 | -0.08 |
| 2,3',4,4',6-Pentachlorobiphenyl | 6.4 | 6.52 | -0.12 |
| 2,3',4,4'-Tetrabromodiphenyl ether | 6.16 | 6.46 | -0.30 |
| 2,3,4,4'-Tetrachlorobiphenyl | 5.84 | 5.99 | -0.15 |
| 2,3',4,4'-Tetrachlorobiphenyl | 6.31 | 5.99 | 0.32 |
| 2,3',4,4'-Tetrachlorodiphenyl ether | 6.13 | 5.98 | 0.15 |
| 2,3,4,5,6-Pentachlorobiphenyl | 6.74 | 6.52 | 0.22 |
| 2,3',4,5',6-Pentachlorobiphenyl | 6.42 | 6.52 | -0.10 |
| 2,3,4',5,6-Pentachlorobiphenyl | 6.39 | 6.52 | -0.13 |
| 2,3,4,5-Tetrachloroaniline | 4.27 | 3.44 | 0.83 |
| 2,3,4,5-Tetrachloroanisole | 4.5 | 4.28 | 0.22 |
| 2,3',4',5'-Tetrachlorobiphenyl | 5.98 | 5.99 | -0.01 |
| 2,3,4,5-Tetrachlorobiphenyl | 6.41 | 5.99 | 0.42 |
| 2,3',4,5-Tetrachlorobiphenyl | 6.32 | 5.99 | 0.33 |
| 2,3,4',5-Tetrachlorobiphenyl | 6.1 | 5.99 | 0.11 |
| 2,3',4',5-Tetrachlorobiphenyl | 6.23 | 5.99 | 0.24 |
| 2,3,4,5-Tetrachloronitrobenzene | 3.93 | 4.22 | -0.29 |
| 2,3,4,5-Tetrachlorophenol | 4.21 | 3.95 | 0.26 |
| 2,3',4,6-Tetrabromodiphenyl ether | 6.16 | 6.46 | -0.30 |
| 2,3,4',6-Tetrachlorobiphenyl | 5.76 | 5.99 | -0.23 |
| 2,3,4,6-Tetrachlorophenol | 3.88 | 3.95 | -0.07 |
| 2,3,4,7,8-Pentachlorodibenzofuran | 6.92 | 6.65 | 0.27 |
| 2',3,4-Tribromodiphenyl ether | 5.58 | 5.81 | -0.23 |
| 2,3,4-Trichloroanisole | 4.03 | 3.75 | 0.28 |
| 2,3',4'-Trichlorobiphenyl | 5.87 | 5.46 | 0.41 |
| 2,3,4-Trichlorobiphenyl | 5.86 | 5.46 | 0.40 |
| 2,3',4-Trichlorobiphenyl | 5.54 | 5.46 | 0.08 |
| 2,3,4'-Trichlorobiphenyl | 5.42 | 5.46 | -0.04 |
| 2,3,4-Trichloronitrobenzene | 3.61 | 3.69 | -0.08 |
| 2,3,4-Trichlorophenol | 3.61 | 3.42 | 0.19 |
| 2,3,5,6-Tetrachloroaniline | 4.1 | 3.44 | 0.66 |
| 2,3,5,6-Tetrachloroanisole | 4.4 | 4.28 | 0.12 |
| 2,3,5,6-Tetrachlorobiphenyl | 5.96 | 5.99 | -0.03 |
| 2,3,5,6-Tetrachloronitrobenzene | 4.38 | 4.22 | 0.16 |
| 2,3,5,6-Tetrachlorophenol | 3.88 | 3.95 | -0.07 |
| 2,3,5,6-Tetrafluorothiophenol | 1.76 | 2.28 | -0.52 |
| 2,3,5,6-Tetramethyl-1,4-benzoquinone | 2.23 | 1.61 | 0.62 |
| 2,3,5,6-Tetramethyl-4-hydroxyacetanilide | 1.44 | 2.44 | -1.00 |
| 2,3',5'-Trichlorobiphenyl | 5.71 | 5.46 | 0.25 |
| 2,3',5-Trichlorobiphenyl | 5.76 | 5.46 | 0.30 |
| 2,3,5-Trimethyl-4-hydroxyacetanilide | 1.3 | 2.1 | -0.80 |
| 2,3,6-Trichlorobiphenyl | 5.67 | 5.46 | 0.21 |
| 2,3,6-Trimethyl-4-hydroxyacetanilide | 1.24 | 2.1 | -0.86 |
| 2,3,6-Trimethylnaphthalene | 4.73 | 4.51 | 0.22 |
| 2,3,6-Trimethylphenol | 2.67 | 2.85 | -0.18 |
| 2,3,7,8-Tetrachlorodibenzofuran | 6.53 | 6.12 | 0.41 |
| 2,3,7,8-Tetrachlorodibenzo-p-dioxin | 6.53 | 6.11 | 0.42 |
| 2,3,7-Trichlorodibenzo-p-dioxin | 6.46 | 5.58 | 0.88 |
| 2,3,8-Trichlorodibenzofuran | 5.75 | 5.59 | 0.16 |
| 2,3-Butanedione | -1.34 | -0.45 | -0.89 |
| 2,3-Butyl dinitrate | 2.36 | 2.37 | -0.01 |
| 2,3-Butyleneglycol | -0.92 | -0.19 | -0.73 |
| 2,3-Dibromo-1-propanol | 0.63 | 0.89 | -0.26 |
| 2,3-Dichloroaniline | 2.78 | 2.38 | 0.40 |
| 2,3-Dichloroanisole | 3.24 | 3.22 | 0.02 |
| 2,3'-Dichlorobiphenyl | 5.02 | 4.93 | 0.09 |
| 2,3-Dichlorobiphenyl | 4.99 | 4.93 | 0.06 |
| 2,3-Dichlorodibenzofuran | 5.43 | 5.06 | 0.37 |
| 2,3-Dichlorodibenzo-p-dioxin | 5.8 | 5.05 | 0.75 |
| 2,3-Dichloronaphthalene | 4.51 | 4.29 | 0.22 |
| 2,3-Dichloronitrobenzene | 3.05 | 3.16 | -0.11 |
| 2,3-Dichlorophenyl N-methylcarbamate | 2.48 | 2.51 | -0.03 |
| 2,3-Dichloropyridine | 2.11 | 2.06 | 0.05 |
| 2,3-Dichlorothiophenol | 2.44 | 3.26 | -0.82 |
| 2,3-Dimethoxyamphetamine | 1.49 | 1.88 | -0.39 |
| 2,3-Dimethyl-4-hydroxyacetanilide | 1.06 | 1.76 | -0.70 |
| 2,3-Dimethylbutane | 3.85 | 3.25 | 0.60 |
| 2,3-Dimethylphenyl N-methylcarbamate | 1.95 | 2.13 | -0.18 |
| 2,3-Xylenol | 2.42 | 2.51 | -0.09 |
| 2,3-Xylidine | 1.81 | 2 | -0.19 |
| 2,4,4',5-Tetrachlorobiphenyl | 6.67 | 5.99 | 0.68 |
| 2,4,4',5-Tetrachlorodiphenyl ether | 5.99 | 5.98 | 0.01 |
| 2,4,4',6-Tetrachlorobiphenyl | 6.03 | 5.99 | 0.04 |
| 2,4,4'-Tribromodiphenyl ether | 5.8 | 5.81 | -0.01 |
| 2,4,4'-Trichlorobiphenyl | 5.62 | 5.46 | 0.16 |
| 2,4,4'-Trichlorodiphenyl ether | 5.53 | 5.45 | 0.08 |
| 2,4,5-T | 3.13 | 3.06 | 0.07 |
| 2,4,5-Trichloroaniline | 3.69 | 2.91 | 0.78 |
| 2,4,5-Trichlorobiphenyl | 5.9 | 5.46 | 0.44 |
| 2,4',5-Trichlorobiphenyl | 5.79 | 5.46 | 0.33 |
| 2,4,5-Trichlorodiphenyl ether | 5.58 | 5.45 | 0.13 |
| 2,4',5-Trichlorodiphenyl ether | 5.7 | 5.45 | 0.25 |
| 2,4,5-Trichloronitrobenzene | 3.47 | 3.69 | -0.22 |
| 2,4,5-Trichlorophenol | 3.72 | 3.42 | 0.30 |
| 2,4,5-Trichlorotoluene | 4.78 | 4.16 | 0.62 |
| 2,4,5-Trimethylphenyl N-methylcarbamate | 2.52 | 2.47 | 0.05 |
| 2,4,5-Trioxoimidazolidine | -0.58 | -1.52 | 0.94 |
| 2,4,6-Collidine | 1.88 | 1.98 | -0.10 |
| 2,4,6-Tribromobiphenyl | 6.03 | 5.82 | 0.21 |
| 2,4,6-Tribromodiphenyl ether | 5.58 | 5.81 | -0.23 |
| 2,4',6-Tribromodiphenyl ether | 5.59 | 5.81 | -0.22 |
| 2,4,6-Tribromophenol | 3.96 | 3.78 | 0.18 |
| 2,4,6-Tribromoresorcinol | 4.37 | 3.38 | 0.99 |
| 2,4,6-Trichloroanisole | 4.02 | 3.75 | 0.27 |
| 2,4,6-Trichlorobiphenyl | 5.71 | 5.46 | 0.25 |
| 2,4',6-Trichlorobiphenyl | 5.75 | 5.46 | 0.29 |
| 2,4,6-Trichlorodibenzofuran | 5.69 | 5.59 | 0.10 |
| 2,4,6-Trichloronitrobenzene | 3.69 | 3.69 | 0.00 |
| 2,4,6-Trichlorophenol | 3.69 | 3.42 | 0.27 |
| 2,4,6-Trichloropurine | 3.9 | 3.36 | 0.54 |
| 2,4,6-Trimethylphenyl isocyanate | 3.21 | 3.31 | -0.10 |
| 2,4,6-Trinitrophenol | 1.33 | 1.95 | -0.62 |
| 2,4,8-Trichlorodibenzofuran | 5.69 | 5.59 | 0.10 |
| 2,4-Diaminobenzoic acid | -1.14 | -1.69 | 0.55 |
| 2,4-Diaminophenol | -0.61 | 0.01 | -0.62 |
| 2,4-Dibromo-2,4-dimethyl-3-pentanone | 1.97 | 2.13 | -0.16 |
| 2,4'-Dibromodiphenyl ether | 5.03 | 5.16 | -0.13 |
| 2,4-Dibromodiphenyl ether | 5.03 | 5.16 | -0.13 |
| 2,4-Dibromophenol | 3.22 | 3.13 | 0.09 |
| 2,4-Dichloro-beta-nitrostyrene | 3.26 | 3.27 | -0.01 |
| 2,4'-Dichlorobiphenyl | 5.1 | 4.93 | 0.17 |
| 2,4-Dichlorobiphenyl | 5.15 | 4.93 | 0.22 |
| 2,4-Dichlorodiphenyl ether | 4.93 | 4.92 | 0.01 |
| 2,4-Dichloronitrobenzene | 3.09 | 3.16 | -0.07 |
| 2,4-Dichlorophenol | 3.06 | 2.89 | 0.17 |
| 2,4-Dichlorophenoxyacetic acid | 2.58 | 2.53 | 0.05 |
| 2,4-Dichlorothiophenol | 2.49 | 3.26 | -0.77 |
| 2,4-Dichlorotoluene | 4.24 | 3.63 | 0.61 |
| 2,4-Difluorophenol | 1.9 | 1.87 | 0.03 |
| 2,4-Difluorothiophenol | 1.34 | 2.24 | -0.90 |
| 2,4-Dimethoxyamphetamine | 1.75 | 1.88 | -0.13 |
| 2,4-Dimethylthiophenol | 3.77 | 2.88 | 0.89 |
| 2,4-Dinitroanisole | 1.61 | 1.9 | -0.29 |
| 2,4-Dinitrophenol | 1.67 | 1.57 | 0.10 |
| 2,4-Dinitrotoluene | 1.98 | 2.31 | -0.33 |
| 2,4-Imidazolidinedione | -1.69 | -1.01 | -0.68 |
| 2,4-Nonanedione | 1.65 | 1.75 | -0.10 |
| 2,4-Octanedione | 1.13 | 1.31 | -0.18 |
| 2,4-Xylenol | 2.35 | 2.51 | -0.16 |
| 2,5-Diamino-1,3,4-thiadiazole | 0.52 | 1.07 | -0.55 |
| 2,5-Diaminonitrobenzene | 0.53 | 0.79 | -0.26 |
| 2,5-Dichloroaniline | 2.75 | 2.38 | 0.37 |
| 2,5-Dichlorobiphenyl | 5.16 | 4.93 | 0.23 |
| 2,5-Dichlorophenol | 3.2 | 2.89 | 0.31 |
| 2,5-Dichlorophenyl N-methylcarbamate | 2.44 | 2.51 | -0.07 |
| 2,5-Dichloropyridine | 2.4 | 2.06 | 0.34 |
| 2,5-Dichlorothiophenol | 2.48 | 3.26 | -0.78 |
| 2,5-Dihydrofuran | 0.46 | 0.79 | -0.33 |
| 2,5-Dihydroxybenzoic acid | 1.18 | 1.16 | 0.02 |
| 2,5-Dimethoxyamphetamine | 1.88 | 1.88 | 0.00 |
| 2,5-Dimethyl-4-hydroxyacetanilide | 1.09 | 1.76 | -0.67 |
| 2,5-Dimethylphenyl N-methylcarbamate | 2.03 | 2.13 | -0.10 |
| 2,5-Dimethylpyrazine | 0.63 | 0.29 | 0.34 |
| 2,5-Dimethylthiophenol | 3.92 | 2.88 | 1.04 |
| 2,5-Dinitrophenol | 1.86 | 2.08 | -0.22 |
| 2,5-Hexyl dinitrate | 3.09 | 3.25 | -0.16 |
| 2,5-Xylenol | 2.34 | 2.51 | -0.17 |
| 2,5-Xylidine | 1.86 | 2 | -0.14 |
| 2,6-Dibromo-4-nitrophenol | 3.05 | 3 | 0.05 |
| 2,6-Dibromodiphenyl ether | 5.03 | 5.16 | -0.13 |
| 2,6-Dichloro-4-nitrophenol | 2.94 | 2.76 | 0.18 |
| 2,6-Dichloroanisole | 3.14 | 3.22 | -0.08 |
| 2,6-Dichlorobenzonitrile | 2.74 | 2.66 | 0.08 |
| 2,6-Dichlorobiphenyl | 4.98 | 4.93 | 0.05 |
| 2,6-Dichlorodiphenyl ether | 4.64 | 4.92 | -0.28 |
| 2,6-Dichlorophenol | 2.75 | 2.89 | -0.14 |
| 2,6-Dichloropyridine | 2.15 | 2.18 | -0.03 |
| 2,6-Dichlorosyringaldehyde | 2.52 | 2.09 | 0.43 |
| 2,6-Dichlorothiophenol | 2.35 | 3.26 | -0.91 |
| 2,6-Dichlorotoluene | 4.29 | 3.63 | 0.66 |
| 2,6-Difluoropyridine | 1.17 | 1.4 | -0.23 |
| 2,6-Dihydroxybenzoic acid | 2.2 | 1.67 | 0.53 |
| 2,6-Diisopropylaniline | 3.18 | 3.44 | -0.26 |
| 2,6-Diisopropylphenol | 3.79 | 3.95 | -0.16 |
| 2,6-Dimethoxyphenol | 1.15 | 1.69 | -0.54 |
| 2,6-Dimethyl-4-hydroxyacetanilide | 0.8 | 1.76 | -0.96 |
| 2,6-Dimethyl-N,N'-dinitrosopiperazine | 0.08 | -0.07 | 0.15 |
| 2,6-Dimethylnaphthalene | 4.31 | 4.15 | 0.16 |
| 2,6-Dimethyl-N-nitrosomorpholine | 0.32 | 0.2 | 0.12 |
| 2,6-Dimethyl-N-nitrosopiperidine | 1.36 | 1.66 | -0.30 |
| 2,6-Dimethylphenyl isocyanate | 2.74 | 2.97 | -0.23 |
| 2,6-Dimethylpyrazine | 0.54 | 0.29 | 0.25 |
| 2,6-Dimethylthiophenol | 4.02 | 2.88 | 1.14 |
| 2,6-Dinitroaniline | 1.79 | 2.08 | -0.29 |
| 2,6-Dinitrophenol | 1.33 | 2.08 | -0.75 |
| 2,6-Dinitrotoluene | 2.1 | 2.31 | -0.21 |
| 2,6-Diphenylpyridine | 4.82 | 4.24 | 0.58 |
| 2,6-Di-s-butylphenol | 4.36 | 4.83 | -0.47 |
| 2,6-Di-t-butylpyridine | 4.14 | 3.8 | 0.34 |
| 2,6-Lutidine | 1.68 | 1.64 | 0.04 |
| 2,6-Xylenol | 2.36 | 2.51 | -0.15 |
| 2,7-Dichlorodibenzofuran | 5.41 | 5.06 | 0.35 |
| 2,7-Dichlorodibenzo-p-dioxin | 5.77 | 5.05 | 0.72 |
| 2,7-Dichloronaphthalene | 4.56 | 4.29 | 0.27 |
| 2,8-Dichlorodibenzofuran | 5.65 | 5.06 | 0.59 |
| 2,8-Dichlorodibenzo-p-dioxin | 5.77 | 5.05 | 0.72 |
| 2,beta-Dinitrostyrene | 1.8 | 2.08 | -0.28 |
| 2,N,N-Trimethylaniline | 2.85 | 2.26 | 0.59 |
| 2.5-Dichloronitrobenzene | 3.03 | 3.16 | -0.13 |
| 2-Acetamido-1,4-naphthoquinone | 1.29 | 0.76 | 0.53 |
| 2-Acetamidopyridine | 0.61 | 0.97 | -0.36 |
| 2-Acetoxyanisole | 1.38 | 2.11 | -0.73 |
| 2-Acetylphenoxyacetic acid | 1.25 | 0.95 | 0.30 |
| 2-Acetylphenyl N,N-dimethylcarbamate | 0.93 | 1.27 | -0.34 |
| 2-Amino-1,3-propanediol | -2.15 | -2.12 | -0.03 |
| 2-Amino-1,7-dihydro-6H-purine-6-thione | -0.07 | -0.21 | 0.14 |
| 2-Amino-1-hexanol | 0.6 | 0.27 | 0.33 |
| 2-Amino-1-pentanol | 0.07 | -0.17 | 0.24 |
| 2-Amino-3,3-dimethyl-1-butanol | 0.34 | 0.03 | 0.31 |
| 2-Amino-4-methyl-1-pentanol | 0.47 | 0.11 | 0.36 |
| 2-Amino-4-picoline | 0.56 | 1.15 | -0.59 |
| 2-Amino-4-pyrimidone | -0.99 | -1.25 | 0.26 |
| 2-Amino-5-methylpyridine | 1.02 | 1.15 | -0.13 |
| 2-Amino-5-phenylvaleric acid | -0.36 | -0.3 | -0.06 |
| 2-Aminoacridine | 2.62 | 2.77 | -0.15 |
| 2-aminodiphenyl ether | 2.46 | 2.95 | -0.49 |
| 2-Aminoisobutanol | -0.59 | -0.65 | 0.06 |
| 2-Aminopentane | 1.23 | 1.16 | 0.07 |
| 2-Aminophenol | 0.57 | 0.92 | -0.35 |
| 2-Aminopyridine | 0.58 | 0.81 | -0.23 |
| 2-Aminopyrimidine | -0.22 | -0.34 | 0.12 |
| 2-Aminoquinazolin-4-one | 0.6 | 0.93 | -0.33 |
| 2-Aminoquinoline | 1.87 | 2.21 | -0.34 |
| 2-Anthracenylisothiocyanate | 5.7 | 5.18 | 0.52 |
| 2-Azacyclooctanethione | 1 | 1.22 | -0.22 |
| 2-Azacyclopentathione | -0.05 | 0.32 | -0.37 |
| 2-Benzimidazolethiol | 1.66 | 1.7 | -0.04 |
| 2-Bromo-3-methylbutyric acid | 1.48 | 1.68 | -0.20 |
| 2-Bromoaniline | 2.29 | 1.97 | 0.32 |
| 2-Bromoanisole | 2.86 | 2.81 | 0.05 |
| 2-Bromobutanoic acid | 1.42 | 1.4 | 0.02 |
| 2-Bromobutyric acid methyl ester | 1.49 | 1.73 | -0.24 |
| 2-Bromoethanol | 0.23 | 0.08 | 0.15 |
| 2-Bromohexanoic acid | 2.14 | 2.28 | -0.14 |
| 2-Bromoisobutyric acid | 0.86 | 1.01 | -0.15 |
| 2-Bromonitrobenzene | 2.51 | 2.75 | -0.24 |
| 2-Bromooctanoic acid | 3.19 | 3.16 | 0.03 |
| 2-Bromophenol | 2.35 | 2.48 | -0.13 |
| 2-Bromophenoxyacetic acid | 2.1 | 2.12 | -0.02 |
| 2-Bromophenyl N-methylcarbamate | 1.77 | 2.1 | -0.33 |
| 2-Bromophenylacetate | 2.2 | 2.83 | -0.63 |
| 2-Bromopropane | 2.14 | 2.08 | 0.06 |
| 2-Bromopropanoic acid | 0.92 | 0.96 | -0.04 |
| 2-Bromopropionitrile | 0.89 | 1.11 | -0.22 |
| 2-Bromothiophenol | 2.44 | 2.85 | -0.41 |
| 2-Bromotoluene | 2.92 | 3.22 | -0.30 |
| 2-Bromovaleric acid | 1.61 | 1.84 | -0.23 |
| 2-Butanol | 0.61 | 0.85 | -0.24 |
| 2-Butanone | 0.69 | 0.85 | -0.16 |
| 2-Buten-1-ol | 0.34 | 0.42 | -0.08 |
| 2-Butylamine | 0.74 | 0.72 | 0.02 |
| 2-Butylthiophenyl N-methylcarbamate | 2.98 | 3.08 | -0.10 |
| 2-Butyn-1,4-diol | -0.72 | -0.73 | 0.01 |
| 2-Butyn-1-ol | 0.37 | 0.34 | 0.03 |
| 2-Butyne | 1.46 | 1.75 | -0.29 |
| 2-Butynyl acetate | 0.81 | 1.31 | -0.50 |
| 2-Chloro-1,4-naphthoquinone | 2.15 | 1.7 | 0.45 |
| 2-Chloro-1-ethylbenzene | 2.95 | 3.54 | -0.59 |
| 2-Chloro-2-methylbutane | 2.52 | 2.78 | -0.26 |
| 2-Chloro-4-phenylenediamine | 0.85 | 0.94 | -0.09 |
| 2-Chloro-5-nitro-beta-nitrostyrene | 2.23 | 2.61 | -0.38 |
| 2-Chloro-6-(trichloromethyl)pyridine | 3.41 | 3.24 | 0.17 |
| 2-Chloro-6-nitrotoluene | 3.09 | 2.97 | 0.12 |
| 2-Chloroaniline | 1.88 | 1.85 | 0.03 |
| 2-Chloroanisole | 2.5 | 2.69 | -0.19 |
| 2-Chlorobenzenesulfonamide | 0.74 | 0.99 | -0.25 |
| 2-Chlorobenzoic acid | 2.05 | 1.98 | 0.07 |
| 2-Chloro-beta-nitrostyrene | 2.44 | 2.74 | -0.30 |
| 2-Chlorobiphenyl | 4.53 | 4.4 | 0.13 |
| 2-Chlorodibenzofuran | 4.37 | 4.53 | -0.16 |
| 2-Chlorodibenzo-p-dioxin | 5.45 | 4.52 | 0.93 |
| 2-Chlorodiphenyl ether | 4.45 | 4.39 | 0.06 |
| 2-Chloroethanol | -0.06 | 0 | -0.06 |
| 2-Chloroisoniazid | 0.11 | -0.43 | 0.54 |
| 2-Chloronaphthalene | 4.14 | 3.76 | 0.38 |
| 2-Chloronitrobenzene | 2.52 | 2.63 | -0.11 |
| 2-Chlorophenol | 2.15 | 2.36 | -0.21 |
| 2-Chlorophenoxyacetic acid | 2.02 | 2 | 0.02 |
| 2-Chlorophenylacetate | 2.18 | 2.71 | -0.53 |
| 2-Chloropropane | 1.9 | 1.96 | -0.06 |
| 2-Chloropropionitrile | 0.75 | 0.99 | -0.24 |
| 2-Chloropyridine | 1.28 | 1.53 | -0.25 |
| 2-Chloroquinoline | 2.71 | 2.93 | -0.22 |
| 2-Chloroquinoxaline | 2.23 | 1.98 | 0.25 |
| 2-Chlorosyringaldehyde | 1.81 | 1.56 | 0.25 |
| 2-Chlorothiophenol | 2.27 | 2.73 | -0.46 |
| 2-Chlorotoluene | 3.52 | 3.1 | 0.42 |
| 2-Cyano-6-methylpyridine | 0.84 | 0.67 | 0.17 |
| 2-Cyanophenyl N-methylcarbamate | 0.86 | 0.82 | 0.04 |
| 2-Cyanophenylacetate | 1.33 | 1.55 | -0.22 |
| 2-Decanone | 3.73 | 3.49 | 0.24 |
| 2-Decyn-1-ol | 3.54 | 2.98 | 0.56 |
| 2-Diethylaminoethanol | 0.48 | 0.44 | 0.04 |
| 2-Dodecanone | 4.55 | 4.37 | 0.18 |
| 2-Ethoxyethanol | -0.54 | -0.2 | -0.34 |
| 2-Ethoxyethylacetate | 0.65 | 0.77 | -0.12 |
| 2-Ethoxyphenol | 1.68 | 2.19 | -0.51 |
| 2-Ethoxyphenyl N-methylcarbamate | 1.24 | 1.81 | -0.57 |
| 2-Ethylaniline | 1.74 | 2.1 | -0.36 |
| 2-Ethylbutanoic acid | 1.68 | 1.75 | -0.07 |
| 2-Ethylbutyl acetate | 2.7 | 2.51 | 0.19 |
| 2-Ethylhexanal | 2.73 | 2.75 | -0.02 |
| 2-Ethylhexanoic acid | 2.64 | 2.63 | 0.01 |
| 2-Ethylhexylamine | 2.82 | 2.33 | 0.49 |
| 2-Ethylnaphthalene | 4.38 | 4.25 | 0.13 |
| 2-Ethylphenoxyacetic acid | 2.65 | 2.25 | 0.40 |
| 2-Ethylphenyl N-methylcarbamate | 1.93 | 2.23 | -0.30 |
| 2-Ethylphenylacetate | 2.42 | 2.96 | -0.54 |
| 2-Ethylpyridine | 1.69 | 1.7 | -0.01 |
| 2-Ethyltoluene | 3.53 | 3.53 | 0.00 |
| 2-Fluoroaniline | 1.38 | 1.34 | 0.04 |
| 2-Fluoroethanol | -0.92 | -0.62 | -0.30 |
| 2-Fluoroisoniazid | -0.11 | -0.82 | 0.71 |
| 2-Fluorophenol | 1.71 | 1.85 | -0.14 |
| 2-Fluorophenoxyacetic acid | 1.26 | 1.49 | -0.23 |
| 2-Fluorophenyl N-methylcarbamate | 1.25 | 1.47 | -0.22 |
| 2-Fluorophenylacetate | 1.76 | 2.2 | -0.44 |
| 2-Fluorophenylacetic acid | 1.5 | 1.91 | -0.41 |
| 2-Fluoropyridine | 0.84 | 1.14 | -0.30 |
| 2-Fluorothiophenol | 1.9 | 2.22 | -0.32 |
| 2-Heptanol | 2.31 | 2.17 | 0.14 |
| 2-Heptanone | 1.98 | 2.17 | -0.19 |
| 2-Heptanone oxime | 2.24 | 1.9 | 0.34 |
| 2-Heptyn-1-ol | 1.95 | 1.66 | 0.29 |
| 2-Hexenoic acid | 1.94 | 1.51 | 0.43 |
| 2-Hexyn-1-ol | 1.42 | 1.22 | 0.20 |
| 2-Hydroxyacetanilide | 0.72 | 1.08 | -0.36 |
| 2-Hydroxyacetophenone | 1.92 | 1.82 | 0.10 |
| 2-Hydroxybenzaldehyde | 1.7 | 1.68 | 0.02 |
| 2-Hydroxybenzamide | 0.89 | 0.67 | 0.22 |
| 2-Hydroxybenzonitrile | 1.61 | 1.2 | 0.41 |
| 2-Hydroxybenzophenone | 3.52 | 3.12 | 0.40 |
| 2-Hydroxybenzylalcohol | 0.73 | 1.35 | -0.62 |
| 2-Hydroxybiphenyl | 3.09 | 3.47 | -0.38 |
| 2-Hydroxyphenoxyacetic acid | 0.85 | 1.07 | -0.22 |
| 2-Iodoaniline | 2.32 | 2.33 | -0.01 |
| 2-Iodobenzoic acid | 2.4 | 2.46 | -0.06 |
| 2-Iodophenol | 2.65 | 2.84 | -0.19 |
| 2-Iodophenoxyacetic acid | 2.44 | 2.48 | -0.04 |
| 2-Iodophenyl N-methylcarbamate | 1.96 | 2.46 | -0.50 |
| 2-Iodophenylacetate | 2.55 | 3.19 | -0.64 |
| 2-Isopropoxyphenol | 2.09 | 2.66 | -0.57 |
| 2-Isopropyl-5-methylphenol | 3.3 | 3.23 | 0.07 |
| 2-Isopropylphenoxyacetic acid | 2.84 | 2.53 | 0.31 |
| 2-Isopropylphenylacetate | 2.78 | 3.24 | -0.46 |
| 2-Isopropyltoluene | 4.1 | 3.83 | 0.27 |
| 2-Methoxyacetanilide | 0.98 | 1.41 | -0.43 |
| 2-Methoxyaniline | 0.95 | 1.25 | -0.30 |
| 2-Methoxybenzamide | 0.87 | 0.49 | 0.38 |
| 2-Methoxybenzylalcohol | 1.13 | 1.68 | -0.55 |
| 2-Methoxyethylamine | -0.67 | -0.72 | 0.05 |
| 2-Methoxyisoniazid | -0.1 | -0.01 | -0.09 |
| 2-Methoxynitrobenzene | 1.73 | 2.03 | -0.30 |
| 2-Methoxyphenol | 1.32 | 1.76 | -0.44 |
| 2-Methoxyphenoxyacetic acid | 0.98 | 1.4 | -0.42 |
| 2-Methoxyphenyl N-methylcarbamate | 0.81 | 1.38 | -0.57 |
| 2-Methoxyquinoxaline | 2.31 | 2.4 | -0.09 |
| 2-Methyl valeraldehyde | 1.67 | 1.87 | -0.20 |
| 2-Methyl-1-propanol | 0.76 | 0.66 | 0.10 |
| 2-Methyl-2-butanamine | 1.1 | 1.12 | -0.02 |
| 2-Methyl-2-butanol | 0.89 | 1.06 | -0.17 |
| 2-Methyl-2-propanol | 0.37 | 0.62 | -0.25 |
| 2-Methyl-2-propenol | 0.21 | 0.57 | -0.36 |
| 2-Methyl-4-hydroxyacetanilide | 0.66 | 1.42 | -0.76 |
| 2-Methyl-5-octyn-4-ol | 2.66 | 2.41 | 0.25 |
| 2-Methyl-8-quinolinol | 2.33 | 2.22 | 0.11 |
| 2-Methylaminoethanol | -0.94 | -1.07 | 0.13 |
| 2-Methylanthracene | 5 | 4.87 | 0.13 |
| 2-Methylbenzaldehyde | 2.26 | 1.91 | 0.35 |
| 2-Methylbenzalmalonodinitrile | 2.1 | 1.86 | 0.24 |
| 2-Methylbenzenesulfonamide | 0.84 | 0.8 | 0.04 |
| 2-Methylbenzoic acid | 2.46 | 1.79 | 0.67 |
| 2-Methylbenzylalcohol | 1.58 | 1.58 | 0.00 |
| 2-Methyl-beta-nitrostyrene | 2.63 | 2.55 | 0.08 |
| 2-Methylbutylamine | 1.32 | 1.01 | 0.31 |
| 2-Methylbutyraldehyde | 1.14 | 1.43 | -0.29 |
| 2-Methylfuran | 1.85 | 1.93 | -0.08 |
| 2-Methylimidazole | 0.49 | -0.11 | 0.60 |
| 2-Methylimidazoline | 0.52 | 0.15 | 0.37 |
| 2-Methylindole | 2.6 | 3.24 | -0.64 |
| 2-Methylisoniazid | -0.37 | -0.7 | 0.33 |
| 2-Methyl-N,N'-dinitrosopiperazine | -0.28 | -0.5 | 0.22 |
| 2-Methylnaphthalene | 3.86 | 3.79 | 0.07 |
| 2-Methyl-N-nitrosopiperidine | 0.71 | 1.23 | -0.52 |
| 2-Methylphenanthrene | 5.24 | 4.87 | 0.37 |
| 2-Methylphenoxyacetic acid | 1.98 | 1.81 | 0.17 |
| 2-Methylphenoxyacetic acid methylester | 2.08 | 2.14 | -0.06 |
| 2-Methylpropanal | 0.61 | 0.99 | -0.38 |
| 2-Methylpropane | 2.76 | 2.35 | 0.41 |
| 2-Methylpropanoic acid | 0.6 | 0.87 | -0.27 |
| 2-Methylpropenoic acid | 0.93 | 0.78 | 0.15 |
| 2-Methylpropylamine | 0.73 | 0.57 | 0.16 |
| 2-Methylpyrazine | 0.23 | -0.09 | 0.32 |
| 2-Methylquinoline | 2.59 | 2.66 | -0.07 |
| 2-Methylquinoxaline | 1.61 | 1.71 | -0.10 |
| 2-Naphthol | 2.7 | 2.83 | -0.13 |
| 2-Naphthoxyacetic acid | 2.53 | 2.47 | 0.06 |
| 2-Naphthylamine | 2.28 | 2.32 | -0.04 |
| 2-Naphthylisothiocyanate | 4.34 | 4.18 | 0.16 |
| 2-Nitroaniline | 1.85 | 1.7 | 0.15 |
| 2-Nitrobenzaldehyde | 1.74 | 1.44 | 0.30 |
| 2-Nitrobenzenesulfonamide | 0.34 | 0.84 | -0.50 |
| 2-Nitrobenzoic acid | 1.47 | 1.83 | -0.36 |
| 2-Nitroethanol | -0.42 | -0.92 | 0.50 |
| 2-Nitroethylbenzene | 2.08 | 2.15 | -0.07 |
| 2-Nitro-m-xylene | 2.95 | 2.78 | 0.17 |
| 2-Nitrophenol | 1.77 | 2.21 | -0.44 |
| 2-Nitrophenoxyacetic acid | 1.22 | 1.34 | -0.12 |
| 2-Nitrophenyl N-methylcarbamate | 1.02 | 1.32 | -0.30 |
| 2-Nitrophenylacetate | 1.55 | 2.05 | -0.50 |
| 2-Nitropropane | 0.93 | 0.81 | 0.12 |
| 2-Nitroresorcinol | 1.36 | 2.32 | -0.96 |
| 2-Nitrotoluene | 2.3 | 2.44 | -0.14 |
| 2-Nonanone | 3.14 | 3.05 | 0.09 |
| 2-Nonyn-1-ol | 3.01 | 2.54 | 0.47 |
| 2-Nonynoic acid | 2.65 | 2.75 | -0.10 |
| 2-n-Propylphenol | 2.93 | 3.05 | -0.12 |
| 2-Octanol | 2.9 | 2.61 | 0.29 |
| 2-Octanone | 2.37 | 2.61 | -0.24 |
| 2-Octen-1-ol | 2.45 | 2.18 | 0.27 |
| 2-Octyn-1-ol | 2.48 | 2.1 | 0.38 |
| 2-Octynoic acid | 2.12 | 2.31 | -0.19 |
| 2-Penten-4-yn-1-ol | -0.01 | 0.08 | -0.09 |
| 2-Pentyn-1-ol | 0.89 | 0.78 | 0.11 |
| 2-Phenethylisothiocyanate | 3.74 | 3.97 | -0.23 |
| 2-Phenoxyanisole | 2.92 | 3.79 | -0.87 |
| 2-Phenoxybenzoic acid | 2.84 | 3.59 | -0.75 |
| 2-Phenoxyethanol | 1.16 | 1.26 | -0.10 |
| 2-Phenylaniline | 3.34 | 2.96 | 0.38 |
| 2-Phenylethylamine | 1.41 | 1.59 | -0.18 |
| 2-Phenylimidazole | 1.88 | 1.19 | 0.69 |
| 2-Phenylphenoxyacetic acid | 2.83 | 3.11 | -0.28 |
| 2-Phenylpyridine | 2.63 | 2.56 | 0.07 |
| 2-Phenylquinoline | 3.9 | 3.96 | -0.06 |
| 2-Phenylthiophene | 3.74 | 3.62 | 0.12 |
| 2-Picoline | 1.11 | 1.26 | -0.15 |
| 2-Propanol | 0.26 | 0.41 | -0.15 |
| 2-Propylpentanoic acid | 2.75 | 2.63 | 0.12 |
| 2-Propyn-1-ol | -0.38 | -0.4 | 0.02 |
| 2-Pyridinecarbonitrile | 0.4 | 0.29 | 0.11 |
| 2-Pyridinemethanamine | -0.21 | -0.16 | -0.05 |
| 2-Pyridinemethanol | 0.06 | -0.07 | 0.13 |
| 2-Pyridinepropanol | 0.58 | 0.81 | -0.23 |
| 2-Pyridone | -0.58 | 0.21 | -0.79 |
| 2-Pyrimidone | -1.62 | -2.21 | 0.59 |
| 2-Pyrrolidone | 0.46 | -0.01 | 0.47 |
| 2-s-Butylphenol | 3.27 | 3.33 | -0.06 |
| 2-s-Butylphenoxyacetic acid | 3.32 | 2.97 | 0.35 |
| 2-s-Butylphenyl N,N-dimethylcarbamate | 3.31 | 3.29 | 0.02 |
| 2-s-Butylphenyl N-methylcarbamate | 2.78 | 2.95 | -0.17 |
| 2-t-Butylphenol | 3.31 | 3.25 | 0.06 |
| 2-t-Butylphenoxyacetic acid | 3.33 | 2.89 | 0.44 |
| 2-t-Butylphenyl N-methylcarbamate | 2.65 | 2.87 | -0.22 |
| 2-Thiocresol | 3.52 | 2.54 | 0.98 |
| 2-Thiouracil | -0.28 | -0.63 | 0.35 |
| 2-Tolunitrile | 2.21 | 1.94 | 0.27 |
| 2-Tolyl N-methylcarbamate | 1.46 | 1.79 | -0.33 |
| 2-Tridecanone | 5.08 | 4.81 | 0.27 |
| 2-Tridecyn-1-ol | 5.13 | 4.3 | 0.83 |
| 2-Trifluoromethylbenzimidazole | 2.67 | 2.42 | 0.25 |
| 2-Trifluoromethylphenol | 2.8 | 2.76 | 0.04 |
| 2-Undecanone | 4.09 | 3.93 | 0.16 |
| 3-(1-Methyl-2-pyrrolidinyl)pyridine | 1.17 | 1.24 | -0.07 |
| 3-(2-pyridyl)propionamide | -0.27 | 0.13 | -0.40 |
| 3-(2-Pyridyl)propylamine | 0.49 | 0.72 | -0.23 |
| 3-(3-pyridyl)propionamide | -0.26 | 0.09 | -0.35 |
| 3-(3-Pyridyl)propylamine | 0.44 | 0.68 | -0.24 |
| 3-(4-Pyridyl)propanol | 0.58 | 0.77 | -0.19 |
| 3-(4-pyridyl)propionamide | -0.25 | 0.09 | -0.34 |
| 3-(4-Pyridyl)propylamine | 0.4 | 0.68 | -0.28 |
| 3-(Dimethylamino)benzamide | 0.95 | 0.25 | 0.70 |
| 3-(Dimethylamino)phenyl N-methylcarbamate | 1.43 | 1.14 | 0.29 |
| 3-(Methylthio)aniline | 1.45 | 1.79 | -0.34 |
| 3-(Trifluoromethylsulfonyl)phenoxyacetic acid | 2.19 | 1.84 | 0.35 |
| 3-(Trifluoromethylthio)phenoxyacetic acid | 2.86 | 3.32 | -0.46 |
| 3,3',4,4',5,5'-Hexachlorobiphenyl | 7.41 | 7.05 | 0.36 |
| 3,3',4,4',5-Pentabromodiphenyl ether | 6.97 | 7.11 | -0.14 |
| 3,3',4,4',5-Pentachlorodiphenyl ether | 6.88 | 6.51 | 0.37 |
| 3,3',4,4'-Tetrabromodiphenyl ether | 6.96 | 6.46 | 0.50 |
| 3,3',4,4'-Tetrachlorobiphenyl | 6.63 | 5.99 | 0.64 |
| 3,3',4,4'-Tetrachlorodiphenyl ether | 6.36 | 5.98 | 0.38 |
| 3,3',4-Tribromodiphenyl ether | 5.58 | 5.81 | -0.23 |
| 3,3',5,5'-Tetrachlorobiphenyl | 6.48 | 5.99 | 0.49 |
| 3,3',5-Trichlorobiphenyl | 5.81 | 5.46 | 0.35 |
| 3,3'-Dichlorobenzidine | 3.51 | 3.11 | 0.40 |
| 3,3'-Dichlorobiphenyl | 5.3 | 4.93 | 0.37 |
| 3,3-Dimethyl-2-butanol | 1.48 | 1.49 | -0.01 |
| 3,3-Dimethylbutyraldehyde | 1.63 | 1.79 | -0.16 |
| 3,3-Dimethylglutaric acid | 0.16 | 0.84 | -0.68 |
| 3,4,4'-Tribromodiphenyl ether | 5.58 | 5.81 | -0.23 |
| 3,4,4'-Trichlorobiphenyl | 5.78 | 5.46 | 0.32 |
| 3,4,5,6-Tetrachloroguaiacol | 4.42 | 3.88 | 0.54 |
| 3,4,5-Trichlorocatechol | 3.75 | 3.02 | 0.73 |
| 3,4,5-Trichloroguaiacol | 3.77 | 3.35 | 0.42 |
| 3,4,5-Trichloroveratrole | 4.01 | 3.68 | 0.33 |
| 3,4,5-Trimethylphenol | 2.87 | 2.85 | 0.02 |
| 3,4-Diaminobenzoic acid | -0.7 | -0.37 | -0.33 |
| 3,4-Diaminofurazan | 0.02 | -0.26 | 0.28 |
| 3,4'-Dibromodiphenyl ether | 5.03 | 5.16 | -0.13 |
| 3,4-Dibromodiphenyl ether | 5.03 | 5.16 | -0.13 |
| 3,4-Dibromohexane | 3.85 | 3.77 | 0.08 |
| 3,4-Dichloroaniline | 2.69 | 2.38 | 0.31 |
| 3,4-Dichlorobenzenesulfonamide | 1.44 | 1.52 | -0.08 |
| 3,4'-Dichlorobiphenyl | 5.15 | 4.93 | 0.22 |
| 3,4-Dichlorobiphenyl | 5.29 | 4.93 | 0.36 |
| 3,4-Dichloronitrobenzene | 3.12 | 3.16 | -0.04 |
| 3,4-Dichlorophenol | 3.33 | 2.89 | 0.44 |
| 3,4-Dichlorophenoxyacetic acid | 2.81 | 2.53 | 0.28 |
| 3,4-Dichlorophenyl N-methylcarbamate | 2.8 | 2.51 | 0.29 |
| 3,4-Dichlorotoluene | 3.95 | 3.63 | 0.32 |
| 3,4-Dihydro-2H-1-benzopyran-2-one | 1.67 | 2.72 | -1.05 |
| 3,4-Dimethoxyamphetamine | 1 | 1.88 | -0.88 |
| 3,4-Dimethylphenyl N-methylcarbamate | 2.09 | 2.13 | -0.04 |
| 3,4-Dimethylthiophenol | 3.62 | 2.88 | 0.74 |
| 3,4-Diphenyl-1,2,5-oxadiazole | 3.84 | 4 | -0.16 |
| 3,4-Xylenol | 2.23 | 2.51 | -0.28 |
| 3,4-Xylidine | 1.86 | 2 | -0.14 |
| 3,5-Dibromo-4-hydroxybenzonitrile | 2.6 | 2.5 | 0.10 |
| 3,5-Dichloroaniline | 2.9 | 2.38 | 0.52 |
| 3,5-Dichlorobiphenyl | 5.41 | 4.93 | 0.48 |
| 3,5-Dichloronitrobenzene | 3.09 | 3.16 | -0.07 |
| 3,5-Dichlorophenol | 3.61 | 2.89 | 0.72 |
| 3,5-Dichlorophenyl N-methylcarbamate | 3.03 | 2.51 | 0.52 |
| 3,5-Dichloropyridine | 2.56 | 1.94 | 0.62 |
| 3,5-Dichlorothiophenol | 2.43 | 3.26 | -0.83 |
| 3,5-Diethyl-4-hydroxyacetanilide | 2.36 | 2.64 | -0.28 |
| 3,5-Diiodosalicylic acid | 4.56 | 3.58 | 0.98 |
| 3,5-Dimethyl-4-hydroxyacetanilide | 1.6 | 1.76 | -0.16 |
| 3,5-Dimethyl-N-nitrosopiperidine | 1.53 | 1.36 | 0.17 |
| 3,5-Dinitro-4-methylbenzamide | 0.68 | 0.64 | 0.04 |
| 3,5-Dinitrophenol | 2.32 | 1.57 | 0.75 |
| 3,5-Dipropyl-4-hydroxyacetanilide | 3.16 | 3.52 | -0.36 |
| 3,5-Dithiaheptane | 2.64 | 2.53 | 0.11 |
| 3,5-Heptanedione | 0.6 | 0.87 | -0.27 |
| 3,5-Xylenol | 2.35 | 2.51 | -0.16 |
| 3,6-Acridinediamine | 1.4 | 1.86 | -0.46 |
| 3,6-Dichlorodibenzofuran | 5.44 | 5.06 | 0.38 |
| 3,6-Dichloropicolinic acid | 1.07 | 1.32 | -0.25 |
| 3,beta-Dinitrostyrene | 1.82 | 2.08 | -0.26 |
| 3-Acetamido-4-chlorophenoxyacetic acid | 0.67 | 1.25 | -0.58 |
| 3-Acetamidophenol | 0.73 | 1.08 | -0.35 |
| 3-Acetamidophenoxyacetic acid | 0.48 | 0.72 | -0.24 |
| 3-Acetaminpyridine | 0.41 | 0.13 | 0.28 |
| 3-Acetylaminoquinoline | 1.92 | 1.53 | 0.39 |
| 3-Acetylphenoxyacetic acid | 0.98 | 0.95 | 0.03 |
| 3-Acetylphenyl N,N-dimethylcarbamate | 1.18 | 1.27 | -0.09 |
| 3-Acetylphenyl N-methylcarbamate | 0.9 | 0.93 | -0.03 |
| 3-Acetylpyridine | 0.43 | 0.36 | 0.07 |
| 3-Allyloxy-4-aminobenzoic acid | 0.42 | 1.12 | -0.70 |
| 3-Amino-1,2-propanediol, | -2.12 | -1.57 | -0.55 |
| 3-Amino-2,2-dimethyl-1-propanol | -0.79 | -0.4 | -0.39 |
| 3-Amino-4-chlorophenoxyacetic acid | 1.16 | 1.09 | 0.07 |
| 3-Amino-4-phenyl-1,2,5-oxadiazole | 1.81 | 1.87 | -0.06 |
| 3-Aminoacridine | 2.19 | 2.77 | -0.58 |
| 3-Aminobenzamide | 0.33 | -0.35 | 0.68 |
| 3-Aminobenzenesulfonamide | -1.2 | -0.45 | -0.75 |
| 3-Aminobenzylalcohol | -0.55 | 0.33 | -0.88 |
| 3-Aminopentane | 1.23 | 1.16 | 0.07 |
| 3-Aminophenol | 0.17 | 0.92 | -0.75 |
| 3-Aminopyridine | 0.11 | -0.03 | 0.14 |
| 3-Aminoquinoline | 1.63 | 1.37 | 0.26 |
| 3-Benzamidophenoxyacetic acid | 1.99 | 2.02 | -0.03 |
| 3-Bromo-1-propanol | 0.15 | 0.52 | -0.37 |
| 3-Bromo-2,2-dimethyl-1-propanol | 0.95 | 1.16 | -0.21 |
| 3-Bromo-4-chlorophenoxyacetic acid | 2.75 | 2.65 | 0.10 |
| 3-Bromoaniline | 2.1 | 1.97 | 0.13 |
| 3-Bromobenzamide | 1.65 | 1.21 | 0.44 |
| 3-Bromobenzoic acid | 2.87 | 2.1 | 0.77 |
| 3-Bromochlorobenzene | 3.7 | 3.41 | 0.29 |
| 3-Bromonitrobenzene | 2.64 | 2.75 | -0.11 |
| 3-Bromophenol | 2.63 | 2.48 | 0.15 |
| 3-Bromophenoxyacetic acid | 2.22 | 2.12 | 0.10 |
| 3-Bromophenyl N-methylcarbamate | 2.25 | 2.1 | 0.15 |
| 3-Bromophenylacetic acid | 2.37 | 2.54 | -0.17 |
| 3-Bromopropionic acid | 0.5 | 0.73 | -0.23 |
| 3-Bromopyridine | 1.6 | 1.53 | 0.07 |
| 3-Bromoquinoline | 2.91 | 2.93 | -0.02 |
| 3-Bromothiophenol | 2.48 | 2.85 | -0.37 |
| 3-Bromotoluene | 3.43 | 3.22 | 0.21 |
| 3-Buten-2-ol | 0.12 | 0.63 | -0.51 |
| 3-Butenoic acid | 0.34 | 0.81 | -0.47 |
| 3-Butoxyphenyl N-methylcarbamate | 2.96 | 2.69 | 0.27 |
| 3-Butylphenoxyacetic acid | 3.18 | 3.13 | 0.05 |
| 3-Butyn-2-ol | 0.14 | 0.07 | 0.07 |
| 3-Carbamidomethylpyridine | -0.71 | -0.35 | -0.36 |
| 3-Carboxyphenol | 1.5 | 1.05 | 0.45 |
| 3-Carboxyphenoxyacetic acid | 1.11 | 0.54 | 0.57 |
| 3-Carboxyphenylacetic acid | 1.14 | 0.96 | 0.18 |
| 3-Chloro-1-propanol | 0.5 | 0.44 | 0.06 |
| 3-Chloro-2,2-dimethyl-1-propanol | 0.81 | 1.08 | -0.27 |
| 3-Chloro-2,4-pentanedione | 0.05 | 0.24 | -0.19 |
| 3-Chloro-2-butanone | 0.43 | 1.1 | -0.67 |
| 3-Chloro-5-fluorophenoxyacetic acid | 2.2 | 2.02 | 0.18 |
| 3-Chloroaniline | 1.88 | 1.85 | 0.03 |
| 3-Chloroanisole | 2.6 | 2.69 | -0.09 |
| 3-Chlorobenzamide | 1.51 | 1.09 | 0.42 |
| 3-Chlorobenzenesulfonamide | 1.29 | 0.99 | 0.30 |
| 3-Chlorobenzoic acid | 2.68 | 1.98 | 0.70 |
| 3-Chlorobenzylalcohol | 1.94 | 1.77 | 0.17 |
| 3-Chloro-beta-nitrostyrene | 2.57 | 2.74 | -0.17 |
| 3-Chlorobiphenyl | 4.58 | 4.4 | 0.18 |
| 3-Chlorodibenzofuran | 4.35 | 4.53 | -0.18 |
| 3-Chloronitrobenzene | 2.46 | 2.63 | -0.17 |
| 3-Chlorophenol | 2.5 | 2.36 | 0.14 |
| 3-Chlorophenoxyacetic acid | 2.03 | 2 | 0.03 |
| 3-Chlorophenyl N-methylcarbamate | 2.03 | 1.98 | 0.05 |
| 3-Chlorophenylacetate | 2.32 | 2.71 | -0.39 |
| 3-Chlorophenylacetic acid | 2.09 | 2.42 | -0.33 |
| 3-Chloropropionic acid | 0.41 | 0.65 | -0.24 |
| 3-Chloropropionitrile | 0.18 | 0.8 | -0.62 |
| 3-Chloropyridine | 1.33 | 1.41 | -0.08 |
| 3-Chlorothiophenol | 2.47 | 2.73 | -0.26 |
| 3-Chlorotoluene | 3.28 | 3.1 | 0.18 |
| 3-Cyanobenzamide | 0.52 | -0.07 | 0.59 |
| 3-Cyanobenzoic acid | 1.48 | 0.82 | 0.66 |
| 3-Cyanophenol | 1.7 | 1.2 | 0.50 |
| 3-Cyanophenoxyacetic acid | 0.95 | 0.84 | 0.11 |
| 3-Cyanophenyl N-methylcarbamate | 0.97 | 0.82 | 0.15 |
| 3-Cyanophenylacetic acid | 1.18 | 1.26 | -0.08 |
| 3-Decanone | 3.49 | 3.49 | 0.00 |
| 3-Decyn-1-ol | 2.99 | 2.98 | 0.01 |
| 3-Dimethylaminophenol | 1.57 | 1.52 | 0.05 |
| 3-Ethoxyphenol | 1.98 | 2.19 | -0.21 |
| 3-Ethoxyphenyl N-methylcarbamate | 1.75 | 1.81 | -0.06 |
| 3-Ethoxypropylamine | -0.49 | 0.15 | -0.64 |
| 3-Ethyl-1-hydroxyurea | -0.76 | -0.91 | 0.15 |
| 3-Ethyl-4-hydroxyacetanilide | 1.79 | 1.86 | -0.07 |
| 3-Ethylphenol | 2.5 | 2.61 | -0.11 |
| 3-Ethylphenoxyacetic acid | 2.25 | 2.25 | 0.00 |
| 3-Ethylphenyl N-methylcarbamate | 2.2 | 2.23 | -0.03 |
| 3-Ethyltoluene | 3.88 | 3.53 | 0.35 |
| 3-Fluoro-5-iodophenoxyacetic acid | 2.42 | 2.5 | -0.08 |
| 3-Fluoroaniline | 1.3 | 1.34 | -0.04 |
| 3-Fluorobenzalmalonodiamide | 0.1 | -0.54 | 0.64 |
| 3-Fluorobenzamide | 0.91 | 0.58 | 0.33 |
| 3-Fluorobenzoic acid | 2.15 | 1.47 | 0.68 |
| 3-Fluorobenzyl chloride | 2.77 | 2.65 | 0.12 |
| 3-Fluorophenol | 1.93 | 1.85 | 0.08 |
| 3-Fluorophenoxyacetic acid | 1.48 | 1.49 | -0.01 |
| 3-Fluorophenyl N-methylcarbamate | 1.48 | 1.47 | 0.01 |
| 3-Fluorophenylacetate | 1.74 | 2.2 | -0.46 |
| 3-Fluorophenylacetic acid | 1.65 | 1.91 | -0.26 |
| 3-Fluorothiophenol | 2.12 | 2.22 | -0.10 |
| 3-Heptanol | 2.24 | 2.17 | 0.07 |
| 3-Heptanone | 1.73 | 2.17 | -0.44 |
| 3-Heptyn-1-ol | 1.4 | 1.66 | -0.26 |
| 3-Hexyn-1-ol | 0.87 | 1.22 | -0.35 |
| 3-Hexyn-2-ol | 1.2 | 1.25 | -0.05 |
| 3-Hexyne-2,5-diol | -0.1 | 0.21 | -0.31 |
| 3-Hydroxyacetophenone | 1.39 | 1.31 | 0.08 |
| 3-Hydroxybenzamide | 0.39 | 0.16 | 0.23 |
| 3-Hydroxybenzylalcohol | 0.49 | 0.84 | -0.35 |
| 3-Hydroxy-beta-nitrostyrene | 2.07 | 1.81 | 0.26 |
| 3-Hydroxybiphenyl | 3.23 | 3.47 | -0.24 |
| 3-Hydroxy-N-Nitrosopiperidine | -0.47 | -0.5 | 0.03 |
| 3-Hydroxyphenoxyacetic acid | 0.76 | 1.07 | -0.31 |
| 3-Hydroxyphenylacetate | 1.23 | 1.78 | -0.55 |
| 3-Hydroxyphenylacetic acid | 0.85 | 1.49 | -0.64 |
| 3-Hydroxypicolinic acid | -1.27 | -1.14 | -0.13 |
| 3-Iodoaniline | 2.86 | 2.33 | 0.53 |
| 3-Iodobenzoic acid | 3.13 | 2.46 | 0.67 |
| 3-Iodonitrobenzene | 2.94 | 3.11 | -0.17 |
| 3-Iodophenol | 2.93 | 2.84 | 0.09 |
| 3-Iodophenoxyacetic acid | 2.62 | 2.48 | 0.14 |
| 3-Iodophenyl N-methylcarbamate | 2.52 | 2.46 | 0.06 |
| 3-Isopropoxyphenyl N-methylcarbamate | 1.96 | 2.28 | -0.32 |
| 3-Isopropyl-4-hydroxyacetanilide | 2.2 | 2.14 | 0.06 |
| 3-Isopropylphenoxyacetic acid | 2.59 | 2.53 | 0.06 |
| 3-Methoxy-4-hydroxybenzaldehyde | 1.21 | 1.1 | 0.11 |
| 3-Methoxybenzalmalonodiamide | 0.01 | -0.12 | 0.13 |
| 3-Methoxybenzamide | 0.94 | 0.49 | 0.45 |
| 3-Methoxy-beta-nitrostyrene | 2.37 | 2.14 | 0.23 |
| 3-Methoxycarbonylphenyl N-methylcarbamate | 1.42 | 1 | 0.42 |
| 3-Methoxyformanilide | 1.25 | 1.2 | 0.05 |
| 3-Methoxyphenol | 1.58 | 1.76 | -0.18 |
| 3-Methoxyphenoxyacetic acid | 1.38 | 1.4 | -0.02 |
| 3-Methoxyphenyl N,N-dimethylcarbamate | 1.6 | 1.72 | -0.12 |
| 3-Methoxyphenyl N-methylcarbamate | 1.3 | 1.38 | -0.08 |
| 3-Methoxyphenylacetic acid | 1.5 | 1.82 | -0.32 |
| 3-Methoxysalicylaldehyde | 1.37 | 1.61 | -0.24 |
| 3-Methoxythiophenol | 2.93 | 2.13 | 0.80 |
| 3-Methoxytoluene | 2.66 | 2.5 | 0.16 |
| 3-Methyl-2-butanol | 1.28 | 1.13 | 0.15 |
| 3-Methyl-2-butanone | 0.84 | 1.13 | -0.29 |
| 3-Methyl-4-hydroxyacetanilide | 1.28 | 1.42 | -0.14 |
| 3-Methyl-4-methylthiophenyl N-methylcarbamate | 2.47 | 2.26 | 0.21 |
| 3-Methyl-4-nitroquinoline-1-oxide | 1.06 | 1.1 | -0.04 |
| 3-Methyl-4-phenyl-1,2,5-oxadiazole | 2.59 | 2.7 | -0.11 |
| 3-Methylamino-1,2-propanediol | -1.82 | -1.67 | -0.15 |
| 3-Methylbenzalmalonodiamide | 0.4 | 0.29 | 0.11 |
| 3-Methylbenzenesulfonamide | 0.85 | 0.8 | 0.05 |
| 3-Methylbenzoic acid | 2.37 | 1.79 | 0.58 |
| 3-Methylbenzylalcohol | 1.6 | 1.58 | 0.02 |
| 3-Methylbutanoic acid | 1.16 | 1.31 | -0.15 |
| 3-Methylcholanthrene | 6.42 | 6.87 | -0.45 |
| 3-Methyl-N-nitrosopiperidine | 0.99 | 1.08 | -0.09 |
| 3-Methylpentane | 3.6 | 3.41 | 0.19 |
| 3-Methylphenanthrene | 5.15 | 4.87 | 0.28 |
| 3-Methylphenoxyacetic acid | 1.78 | 1.81 | -0.03 |
| 3-Methylpyridine | 1.2 | 1.22 | -0.02 |
| 3-Methylquinazolin-4-one | 0.69 | 0.39 | 0.30 |
| 3-Methylstyrene | 3.35 | 3.31 | 0.04 |
| 3-Methylthiophenoxyacetic acid | 1.9 | 1.94 | -0.04 |
| 3-Methylvaleric acid | 1.75 | 1.75 | 0.00 |
| 3-Nitroacetophenone | 1.42 | 1.58 | -0.16 |
| 3-Nitroaniline | 1.37 | 1.19 | 0.18 |
| 3-Nitroanisole | 2.16 | 2.03 | 0.13 |
| 3-Nitrobenzaldehyde | 1.47 | 1.44 | 0.03 |
| 3-Nitrobenzamide | 0.77 | 0.43 | 0.34 |
| 3-Nitrobenzenesulfonamide | 0.55 | 0.33 | 0.22 |
| 3-Nitrobenzoic acid | 1.89 | 1.32 | 0.57 |
| 3-Nitrobenzonitrile | 1.17 | 1.47 | -0.30 |
| 3-Nitrobenzylalcohol | 1.21 | 1.11 | 0.10 |
| 3-Nitrophenol | 2 | 1.7 | 0.30 |
| 3-Nitrophenoxyacetic acid | 1.37 | 1.34 | 0.03 |
| 3-Nitrophenyl N-methylcarbamate | 1.39 | 1.32 | 0.07 |
| 3-Nitrophenylacetate | 1.82 | 2.05 | -0.23 |
| 3-Nitrophenylacetic acid | 1.45 | 1.76 | -0.31 |
| 3-Nitropyridine | 0.6 | 0.75 | -0.15 |
| 3-Nitroquinoline | 1.97 | 2.15 | -0.18 |
| 3-Nitroquinoline-1-oxide | 0.56 | 0.76 | -0.20 |
| 3-Nitrotoluene | 2.45 | 2.44 | 0.01 |
| 3-Nonyn-1-ol | 2.46 | 2.54 | -0.08 |
| 3-Octyn-1-ol | 1.93 | 2.1 | -0.17 |
| 3-p-Anisoyl-3-bromoacrylic acid | 1.74 | 1.7 | 0.04 |
| 3-Pentanol | 1.21 | 1.29 | -0.08 |
| 3-Penten-2-ol | 0.65 | 0.89 | -0.24 |
| 3-Pentyn-1-ol | 0.34 | 0.78 | -0.44 |
| 3-Phenyl-1-iodopropane | 3.9 | 4.26 | -0.36 |
| 3-Phenylphenoxyacetic acid | 3.18 | 3.11 | 0.07 |
| 3-Phenylpropanoic acid | 1.84 | 2.33 | -0.49 |
| 3-Phenylpropene | 3.23 | 3.41 | -0.18 |
| 3-Phenylpropionamide | 1.03 | 1.44 | -0.41 |
| 3-Phenylpropylamine | 1.83 | 2.03 | -0.20 |
| 3-Phenylpropyldimethylamine | 2.73 | 2.85 | -0.12 |
| 3-Phenylpropylfluoride | 2.95 | 2.89 | 0.06 |
| 3-Propionylphenyl N-methylcarbamate | 1.49 | 1.37 | 0.12 |
| 3-Propylphenoxyacetic acid | 2.71 | 2.69 | 0.02 |
| 3-Pyridinecarbonitrile | 0.36 | 0.25 | 0.11 |
| 3-Pyridinemethanamine | -0.32 | -0.2 | -0.12 |
| 3-Pyridinemethanol | -0.02 | -0.11 | 0.09 |
| 3-Pyridinepropanol | 0.6 | 0.77 | -0.17 |
| 3-t-Butyl-4-hydroxyacetanilide | 2.85 | 2.5 | 0.35 |
| 3-t-Butylphenyl N-methylcarbamate | 2.93 | 2.87 | 0.06 |
| 3-Tetradecyn-1-ol | 5.11 | 4.74 | 0.37 |
| 3-Thiocresol | 3.13 | 2.54 | 0.59 |
| 3-Thiopropionic acid | 0.43 | 0.64 | -0.21 |
| 3-Trifluoromethylbenzoic acid | 2.95 | 2.38 | 0.57 |
| 3-Trifluoromethylphenol | 2.95 | 2.76 | 0.19 |
| 3-Trifluoromethylphenoxyacetic acid | 2.36 | 2.4 | -0.04 |
| 3-Trifluoromethylphenylacetic acid | 2.62 | 2.82 | -0.20 |
| 3-Ureidophenoxyacetic acid | 0.26 | 0.16 | 0.10 |
| 4-(2,4-Dichlorophenoxy)butyric acid | 3.53 | 3.41 | 0.12 |
| 4-(2-Pyridyl)butanol | 0.86 | 1.25 | -0.39 |
| 4-(2-Pyridyl)butylamine | 0.86 | 1.16 | -0.30 |
| 4-(2-Pyridyl)pentamide | -0.01 | 0.85 | -0.86 |
| 4(3H)-Pyridmidone | -1.38 | -1.05 | -0.33 |
| 4-(3-Pyridyl)butanamide | -0.08 | 0.53 | -0.61 |
| 4-(3-Pyridyl)butanol | 0.92 | 1.21 | -0.29 |
| 4-(3-Pyridyl)butylamine | 0.88 | 1.12 | -0.24 |
| 4-(4-Pyridyl)butanamide | -0.09 | 0.53 | -0.62 |
| 4-(4-Pyridyl)butanol | 0.9 | 1.21 | -0.31 |
| 4-(4-Pyridyl)butylamine | 0.86 | 1.12 | -0.26 |
| 4-(Acetylamino)benzamide | 0.01 | -0.19 | 0.20 |
| 4-(Acetylamino)benzoic acid | 1.31 | 0.7 | 0.61 |
| 4-(Dimethylamino)benzamide | 1.14 | 0.25 | 0.89 |
| 4-(Methylthio)benzoic acid | 2.74 | 1.92 | 0.82 |
| 4-(Methylthio)phenol | 1.78 | 2.3 | -0.52 |
| 4-(Methylthio)phenyl N-methylcarbamate | 1.92 | 1.92 | 0.00 |
| 4,4'-Diaminodiphenyl sulfone | 0.97 | 1.07 | -0.10 |
| 4,4'-Dibromobiphenyl | 5.72 | 5.17 | 0.55 |
| 4,4'-Dibromodiphenyl ether | 5.03 | 5.16 | -0.13 |
| 4,4'-Dichlorobiphenyl | 5.58 | 4.93 | 0.65 |
| 4,4'-Diisothiocyanatobiphenyl | 5.5 | 5.77 | -0.27 |
| 4,4'-Dimethylbiphenyl | 5.09 | 4.83 | 0.26 |
| 4,5,6-Trichloro-2-trifluoromethylbenzimidazole | 4.08 | 4.01 | 0.07 |
| 4,5,6-Trichloroguaiacol | 3.72 | 3.35 | 0.37 |
| 4,5,7-Trichloro-2-trifluoromethylbenzimidazole | 3.78 | 4.01 | -0.23 |
| 4,5-Dibromo-1,2,3-triazole | 2.24 | 3.01 | -0.77 |
| 4,5-Dichloroguaiacol | 3.26 | 2.82 | 0.44 |
| 4,5-Dichloroveratrole | 3.11 | 3.15 | -0.04 |
| 4,5-Diethyldibenzothiophene | 5.98 | 6.07 | -0.09 |
| 4,5-Dimethyl-8-quinolinol | 2.71 | 2.56 | 0.15 |
| 4,5-Dimethyldibenzothiophene | 5.97 | 5.19 | 0.78 |
| 4,5-Dinitroquinoline-1-oxide | 0.95 | 0.63 | 0.32 |
| 4,6-Dichloro-2-trifluoromethylbenzimidazole | 3.49 | 3.48 | 0.01 |
| 4,6-Dimethylpyrimidine | 0.62 | 0.61 | 0.01 |
| 4,6-Dinitro-o-cresol | 2.12 | 2.42 | -0.30 |
| 4,6-Dinitroquinoline-1-oxide | 0.9 | 0.63 | 0.27 |
| 4,7-Dichloro-2-trifluoromethylbenzimidazole | 2.87 | 3.48 | -0.61 |
| 4,7-Phenanthroline | 2.05 | 2.33 | -0.28 |
| 4,beta-Dinitrostyrene | 1.89 | 2.08 | -0.19 |
| 4-Acetaminpyridine | 0.59 | 0.13 | 0.46 |
| 4-Acetyl-7-chloroquinoline | 2.62 | 2.29 | 0.33 |
| 4-Acetylanisole | 1.82 | 1.64 | 0.18 |
| 4-Acetylformanilide | 0.94 | 0.75 | 0.19 |
| 4-Acetylphenol | 1.35 | 1.31 | 0.04 |
| 4-Acetylphenoxyacetic acid | 0.87 | 0.95 | -0.08 |
| 4-Acetylphenyl N-methylcarbamate | 1.01 | 0.93 | 0.08 |
| 4-Acetylpyridine | 0.54 | 0.36 | 0.18 |
| 4-Allyl-2-methoxyphenol | 2.27 | 2.76 | -0.49 |
| 4-Amino-1-butanol | -1.06 | -0.6 | -0.46 |
| 4-Amino-2-bromobenzoic acid | 0.66 | 1.19 | -0.53 |
| 4-Amino-2-butoxybenzoic acid | 1.24 | 2.29 | -1.05 |
| 4-Amino-2-chlorobenzoic acid | 0.5 | 1.07 | -0.57 |
| 4-Amino-2-ethoxybenzoic acid | 0.16 | 0.9 | -0.74 |
| 4-Amino-2-fluorobenzoic acid | 0.46 | 0.56 | -0.10 |
| 4-Amino-2-iodobenzoic acid | 0.82 | 1.55 | -0.73 |
| 4-Amino-2-isopentoxybenzoic acid | 1.47 | 2.57 | -1.10 |
| 4-Amino-2-methoxybenzoic acid | -0.38 | 0.47 | -0.85 |
| 4-Amino-2-methylbenzoic acid | 0.31 | 0.88 | -0.57 |
| 4-Amino-2-nitrobenzoic acid | 0.38 | 0.41 | -0.03 |
| 4-Amino-2-nitrophenol | 0.96 | 1.3 | -0.34 |
| 4-Amino-2-pentoxybenzoic acid | 1.55 | 2.73 | -1.18 |
| 4-Amino-2-propoxybenzoic acid | 0.7 | 1.85 | -1.15 |
| 4-Amino-3,5,6-trichloro-2-pyridinecarboxlic acid | 0.3 | 0.94 | -0.64 |
| 4-Amino-3-bromobenzoic acid | 1.4 | 1.19 | 0.21 |
| 4-Amino-3-chlorobenzoic acid | 1.52 | 1.07 | 0.45 |
| 4-Amino-3-fluorobenzoic acid | 0.58 | 0.56 | 0.02 |
| 4-Amino-3-hydroxybenzoic acid | -0.32 | 0.14 | -0.46 |
| 4-Amino-3-iodobenzoic acid | 1.53 | 1.55 | -0.02 |
| 4-Amino-3-methylbenzoic acid | 0.54 | 0.88 | -0.34 |
| 4-Amino-3-methylthio-6-propyl-1,2,4-triazine-5-one | 1.01 | 1.28 | -0.27 |
| 4-Amino-3-morpholino-6-isopropyl-1,2,4-triazine-5-one | 0.49 | 0.16 | 0.33 |
| 4-Amino-6-isopentyl-3-methylthio-1,2,4-triazin-5-one | 1.85 | 2 | -0.15 |
| 4-Amino-6-isopropyl-3-isopropylthio-1,2,4-triazin-5-one | 2.06 | 1.79 | 0.27 |
| 4-Amino-6-isopropyl-3-propylthio-1,2,4-triazin-5-one | 2.12 | 1.84 | 0.28 |
| 4-Amino-6-methyl-3-(methylthio)-1,2,4-triazin-5-one | -0.16 | 0.4 | -0.56 |
| 4-Amino-6-phenyl-3-(methylthio)-1,2,4-triazin-5-one | 1.66 | 1.7 | -0.04 |
| 4-Aminoacetanilide | 0.08 | 0.57 | -0.49 |
| 4-Aminoacetophenone | 0.41 | 0.8 | -0.39 |
| 4-Aminoacridine | 3.26 | 2.77 | 0.49 |
| 4-Aminobenzamide | 0.02 | -0.35 | 0.37 |
| 4-Aminobenzenesulfonamide | -0.78 | -0.45 | -0.33 |
| 4-aminodiphenyl ether | 2.36 | 2.95 | -0.59 |
| 4-Aminophenol | 0.04 | 0.92 | -0.88 |
| 4-Aminophenylacetate | 0.45 | 1.27 | -0.82 |
| 4-Aminopyridine | 0.28 | -0.03 | 0.31 |
| 4-Aminopyrimidine | -0.25 | -0.22 | -0.03 |
| 4-Aminoquinoline | 1.63 | 1.37 | 0.26 |
| 4-Aminoquinoline-1-oxide | 0.05 | -0.02 | 0.07 |
| 4-Aminosalicylic acid | 0.87 | 0.65 | 0.22 |
| 4-Aminosalicylic acid 2-bromophenylester | 3.74 | 3.33 | 0.41 |
| 4-Aminosalicylic acid 2-chlorophenylester | 3.72 | 3.21 | 0.51 |
| 4-Aminosalicylic acid 2-fluorophenylester | 3.29 | 2.7 | 0.59 |
| 4-Aminosalicylic acid 2-methoxyphenylester | 2.88 | 2.61 | 0.27 |
| 4-Aminosalicylic acid 2-tolylester | 3.14 | 3.02 | 0.12 |
| 4-Aminosalicylic acid 3-bromophenylester | 3.84 | 3.33 | 0.51 |
| 4-Aminosalicylic acid 3-chlorophenylester | 3.9 | 3.21 | 0.69 |
| 4-Aminosalicylic acid 3-fluorophenylester | 3.42 | 2.7 | 0.72 |
| 4-Aminosalicylic acid 3-methoxyphenylester | 3.25 | 2.61 | 0.64 |
| 4-Aminosalicylic acid 3-tolylester | 3.64 | 3.02 | 0.62 |
| 4-Aminosalicylic acid 4-bromophenylester | 3.46 | 3.33 | 0.13 |
| 4-Aminosalicylic acid 4-chlorophenylester | 3.6 | 3.21 | 0.39 |
| 4-Aminosalicylic acid 4-fluorophenylester | 3.27 | 2.7 | 0.57 |
| 4-Aminosalicylic acid 4-methoxyphenylester | 3.07 | 2.61 | 0.46 |
| 4-Aminosalicylic acid 4-tolylester | 3.38 | 3.02 | 0.36 |
| 4-Aminothiophenol | 1.88 | 1.29 | 0.59 |
| 4-Benzoylphenol | 3.07 | 2.61 | 0.46 |
| 4-Benzoylpyridine | 1.98 | 1.66 | 0.32 |
| 4-Benzylphenylisothiocyanate | 4.4 | 5.26 | -0.86 |
| 4-Biphenylisothiocyanate | 4.66 | 4.82 | -0.16 |
| 4-Bromo-1-butene | 2.53 | 2.07 | 0.46 |
| 4-Bromo-2,6-dimethylphenyl isocyanate | 3.63 | 3.62 | 0.01 |
| 4-Bromo-3,5-dimethoxyphenethylamine | 2.03 | 2.1 | -0.07 |
| 4-Bromoacetophenone | 2.43 | 2.36 | 0.07 |
| 4-Bromoaniline | 2.26 | 1.97 | 0.29 |
| 4-Bromobenzamide | 1.76 | 1.21 | 0.55 |
| 4-Bromobenzenesulfonamide | 1.36 | 1.11 | 0.25 |
| 4-Bromobenzoic acid | 2.86 | 2.1 | 0.76 |
| 4-Bromobiphenyl | 4.95 | 4.52 | 0.43 |
| 4-Bromobutyl acetate | 1.62 | 1.93 | -0.31 |
| 4-Bromobutyric acid | 0.68 | 1.17 | -0.49 |
| 4-Bromobutyronitrile | 0.52 | 1.32 | -0.80 |
| 4-Bromonitrobenzene | 2.55 | 2.75 | -0.20 |
| 4-Bromophenol | 2.43 | 2.48 | -0.05 |
| 4-Bromophenoxyacetic acid | 2.45 | 2.12 | 0.33 |
| 4-Bromophenyl N-methylcarbamate | 2.17 | 2.1 | 0.07 |
| 4-Bromophenylacetic acid | 2.31 | 2.54 | -0.23 |
| 4-Bromophenylisothiocyanate | 4.03 | 3.83 | 0.20 |
| 4-Bromopyridine | 1.54 | 1.53 | 0.01 |
| 4-Bromothiophenol | 2.72 | 2.85 | -0.13 |
| 4-Bromotoluene | 3.42 | 3.22 | 0.20 |
| 4-Butoxybenzamide | 2.48 | 1.8 | 0.68 |
| 4-Butoxyphenol | 2.87 | 3.07 | -0.20 |
| 4-Butoxyphenyl N-methylcarbamate | 2.86 | 2.69 | 0.17 |
| 4-Butylaniline | 3.18 | 2.98 | 0.20 |
| 4-Butylbenzenesulfonamide | 2.45 | 2.12 | 0.33 |
| 4-Carbamidomethylpyridine | -0.65 | -0.35 | -0.30 |
| 4-Carboxyphenol | 1.58 | 1.05 | 0.53 |
| 4-Carboxyphenylisothiocyanate | 3.52 | 2.4 | 1.12 |
| 4-Chloro-1-butanol | 0.85 | 0.88 | -0.03 |
| 4-Chloro-2,5-dimethylphenyl N-methylcarbamate | 2.95 | 2.66 | 0.29 |
| 4-Chloro-2-methylphenol | 2.78 | 2.7 | 0.08 |
| 4-Chloro-2-nitrotoluene | 3.05 | 2.97 | 0.08 |
| 4-Chloro-2-trifluoromethylbenzimidazole | 2.93 | 2.95 | -0.02 |
| 4-Chloro-3-cyanophenoxyacetic acid | 1.56 | 1.37 | 0.19 |
| 4-Chloro-3-iodophenoxyacetic acid | 3.1 | 3.01 | 0.09 |
| 4-Chloro-3-nitrophenoxyacetic acid | 1.85 | 1.87 | -0.02 |
| 4-Chloro-6-nitro-m-cresol | 2.93 | 3.08 | -0.15 |
| 4-Chloro-8-quinolinol | 2.67 | 2.41 | 0.26 |
| 4-Chloroacetanilide | 1.87 | 2.01 | -0.14 |
| 4-Chloroacetophenone | 2.35 | 2.24 | 0.11 |
| 4-Chloroaniline | 1.83 | 1.85 | -0.02 |
| 4-Chloroanisole | 2.78 | 2.69 | 0.09 |
| 4-Chlorobenzaldehyde | 2.13 | 2.1 | 0.03 |
| 4-Chlorobenzamide | 1.51 | 1.09 | 0.42 |
| 4-Chlorobenzenesulfonamide | 0.84 | 0.99 | -0.15 |
| 4-Chlorobenzoic acid | 2.65 | 1.98 | 0.67 |
| 4-Chlorobenzylalcohol | 1.96 | 1.77 | 0.19 |
| 4-Chloro-beta-nitrostyrene | 2.85 | 2.74 | 0.11 |
| 4-Chlorobiphenyl | 4.61 | 4.4 | 0.21 |
| 4-Chlorobutanoic acid | 0.54 | 1.09 | -0.55 |
| 4-Chlorobutyronitrile | 0.56 | 1.24 | -0.68 |
| 4-Chlorodiphenyl ether | 4.08 | 4.39 | -0.31 |
| 4-Chloro-m-cresol | 3.1 | 2.7 | 0.40 |
| 4-Chloronitrobenzene | 2.39 | 2.63 | -0.24 |
| 4-Chlorophenol | 2.39 | 2.36 | 0.03 |
| 4-Chlorophenoxyacetic acid | 1.99 | 2 | -0.01 |
| 4-Chlorophenylacetic acid | 2.12 | 2.42 | -0.30 |
| 4-Chloroquinoline-1-oxide | 1.08 | 1.42 | -0.34 |
| 4-Chlorothiophenol | 2.66 | 2.73 | -0.07 |
| 4-Chlorotoluene | 3.33 | 3.1 | 0.23 |
| 4-Cumylphenyl diphenyl phosphate | 6.1 | 6.88 | -0.78 |
| 4-Cyano-2-methylpyridine | 0.81 | 0.63 | 0.18 |
| 4-Cyanobenzamide | 0.48 | -0.07 | 0.55 |
| 4-Cyanobenzenesulfonamide | 0.23 | -0.17 | 0.40 |
| 4-Cyanobenzoic acid | 1.56 | 0.82 | 0.74 |
| 4-Cyanoformanilide | 1.08 | 0.64 | 0.44 |
| 4-Cyano-N-formylstyrylamine | 1.58 | 0.73 | 0.85 |
| 4-Cyanophenoxyacetic acid | 0.93 | 0.84 | 0.09 |
| 4-Cyanophenyl N-methylcarbamate | 0.95 | 0.82 | 0.13 |
| 4-Cyanopyrazole | 0.24 | 0.49 | -0.25 |
| 4-Cyanopyridine | 0.46 | 0.25 | 0.21 |
| 4-Cyclohexylphenoxyacetic acid | 3.79 | 3.35 | 0.44 |
| 4-Cyclopentylphenoxyacetic acid | 3.41 | 3.05 | 0.36 |
| 4-Cyclopropyl-2-butanone | 1.5 | 1.93 | -0.43 |
| 4-Diethylaminobenzylalcohol | 2.29 | 2.03 | 0.26 |
| 4-Dimethylamino-beta-nitrostyrene | 2.67 | 1.9 | 0.77 |
| 4-Ethoxyacetanilide | 1.58 | 1.84 | -0.26 |
| 4-Ethoxybenzamide | 1.3 | 0.92 | 0.38 |
| 4-Ethoxyphenol | 1.81 | 2.19 | -0.38 |
| 4-Ethoxyphenyl N-methylcarbamate | 1.63 | 1.81 | -0.18 |
| 4-Ethoxyphenylacetate | 1.95 | 2.54 | -0.59 |
| 4-Ethylaniline | 1.96 | 2.1 | -0.14 |
| 4-Ethylbenzenesulfonamide | 1.31 | 1.24 | 0.07 |
| 4-Ethylbenzylidene t-butylamine N-oxide | 2.19 | 2.1 | 0.09 |
| 4-Ethylphenol | 2.5 | 2.61 | -0.11 |
| 4-Ethylphenyl N-methylcarbamate | 2.23 | 2.23 | 0.00 |
| 4-Ethylphenylacetate | 2.56 | 2.96 | -0.40 |
| 4-Ethylpyridine | 1.65 | 1.66 | -0.01 |
| 4-Ethyltoluene | 3.63 | 3.53 | 0.10 |
| 4-Fluoroacetanilide | 1.47 | 1.5 | -0.03 |
| 4-Fluoroaniline | 1.46 | 1.34 | 0.12 |
| 4-Fluorobenzamide | 0.91 | 0.58 | 0.33 |
| 4-Fluorobenzoic acid | 1.67 | 1.47 | 0.20 |
| 4-Fluorobenzylidene t-butylamine N-oxide | 1.42 | 1.34 | 0.08 |
| 4-Fluoronitrobenzene | 1.99 | 2.12 | -0.13 |
| 4-Fluorophenol | 1.79 | 1.85 | -0.06 |
| 4-Fluorophenoxyacetic acid | 1.41 | 1.49 | -0.08 |
| 4-Fluorophenyl N-methylcarbamate | 1.28 | 1.47 | -0.19 |
| 4-Fluorophenylacetic acid | 1.55 | 1.91 | -0.36 |
| 4-Fluorothiophenol | 2.92 | 2.22 | 0.70 |
| 4-Formylphenoxyacetic acid | 0.79 | 0.81 | -0.02 |
| 4-Heptanol | 2.22 | 2.17 | 0.05 |
| 4-Heptanone | 1.91 | 2.17 | -0.26 |
| 4-Heptyn-2-ol | 1.18 | 1.69 | -0.51 |
| 4-Heptyn-3-ol | 1.73 | 1.69 | 0.04 |
| 4-Hexylpyridine | 3.84 | 3.42 | 0.42 |
| 4-Hexylresorcinol | 3.45 | 3.97 | -0.52 |
| 4-Hexyn-3-ol | 1.2 | 1.25 | -0.05 |
| 4-Hydroxy-3-methoxybenzaldehyde | 0.97 | 1.1 | -0.13 |
| 4-Hydroxybenzamide | 0.25 | 0.16 | 0.09 |
| 4-Hydroxybenzenesulfonamide | 0.06 | 0.06 | 0.00 |
| 4-Hydroxybenzoic acid heptylester | 4.83 | 4.01 | 0.82 |
| 4-Hydroxybenzonitrile | 1.6 | 1.2 | 0.40 |
| 4-Hydroxybenzylalcohol | 0.25 | 0.84 | -0.59 |
| 4-Hydroxy-beta-nitrostyrene | 2.12 | 1.81 | 0.31 |
| 4-Hydroxybiphenyl | 3.2 | 3.47 | -0.27 |
| 4-Hydroxy-N-Nitrosopiperidine | -0.89 | -0.5 | -0.39 |
| 4-Hydroxyphenoxyacetic acid | 0.65 | 1.07 | -0.42 |
| 4-Hydroxyphenylacetic acid | 1.96 | 1.49 | 0.47 |
| 4'-Hydroxypropiophenone | 2.03 | 1.75 | 0.28 |
| 4-Iodoacetanilide | 2.46 | 2.49 | -0.03 |
| 4-Iodoaniline | 2.34 | 2.33 | 0.01 |
| 4-Iodobenzamide | 1.99 | 1.57 | 0.42 |
| 4-Iodobenzoic acid | 3.02 | 2.46 | 0.56 |
| 4-Iodophenol | 2.9 | 2.84 | 0.06 |
| 4-Iodophenoxyacetic acid | 2.64 | 2.48 | 0.16 |
| 4-Iodophenyl N-methylcarbamate | 2.46 | 2.46 | 0.00 |
| 4-Isopropyl-3-methylphenyl N-methylcarbamate | 3.11 | 2.85 | 0.26 |
| 4-Isopropylaniline | 2.47 | 2.38 | 0.09 |
| 4-Isopropylbenzamide | 2.14 | 1.62 | 0.52 |
| 4-Isopropylphenoxyacetic acid | 2.69 | 2.53 | 0.16 |
| 4-Isothiocyanatobenzophenone | 4.88 | 3.96 | 0.92 |
| 4-Isothiocyanatodiphenylamine | 4.94 | 4.49 | 0.45 |
| 4-Isothiocyanatodiphenylether | 4.75 | 4.81 | -0.06 |
| 4-Isothiocyanatophenylbenzoate | 4.9 | 4.43 | 0.47 |
| 4-Methoxyacetanilide | 1.14 | 1.41 | -0.27 |
| 4-Methoxyaniline | 0.95 | 1.25 | -0.30 |
| 4-Methoxybenzaldehyde | 1.59 | 1.5 | 0.09 |
| 4-Methoxybenzamide | 0.86 | 0.49 | 0.37 |
| 4-Methoxybenzoic acid | 1.96 | 1.38 | 0.58 |
| 4-Methoxybenzylidene t-butylamine N-oxide | 1.21 | 1.25 | -0.04 |
| 4-Methoxy-beta-nitrostyrene | 2.2 | 2.14 | 0.06 |
| 4-Methoxycarbonylphenyl N-methylcarbamate | 1.5 | 1 | 0.50 |
| 4-Methoxyformanilide | 1.03 | 1.2 | -0.17 |
| 4-Methoxy-N,N-dimethylaniline | 1.42 | 1.85 | -0.43 |
| 4-Methoxyphenol | 1.34 | 1.76 | -0.42 |
| 4-Methoxyphenoxyacetic acid | 1.23 | 1.4 | -0.17 |
| 4-Methoxyphenyl N,N-dimethylcarbamate | 1.53 | 1.72 | -0.19 |
| 4-Methoxyphenyl N-methylcarbamate | 1.2 | 1.38 | -0.18 |
| 4-Methoxyphenylacetate | 1.54 | 2.11 | -0.57 |
| 4-Methoxyphenylacetic acid | 1.42 | 1.82 | -0.40 |
| 4-Methoxytoluene | 2.81 | 2.5 | 0.31 |
| 4-Methyl-1-heptyn-3-ol | 2.13 | 1.67 | 0.46 |
| 4-Methyl-1H-pyrazole | 0.9 | 1.46 | -0.56 |
| 4-Methyl-1-pentyn-3-ol | 1.07 | 0.79 | 0.28 |
| 4-Methyl-2-nitroaniline | 1.82 | 2.04 | -0.22 |
| 4-Methyl-2-pentanol | 1.53 | 1.57 | -0.04 |
| 4-Methyl-5-methoxy-8-quinolinol | 2.75 | 2.15 | 0.60 |
| 4-Methyl-8-quinolinol | 2.36 | 2.22 | 0.14 |
| 4-Methylacetophenone | 2.28 | 2.05 | 0.23 |
| 4-Methylbenzenesulfonamide | 0.82 | 0.8 | 0.02 |
| 4-Methylbenzoic acid | 2.27 | 1.79 | 0.48 |
| 4-Methylbenzylalcohol | 1.59 | 1.58 | 0.01 |
| 4-Methylbenzylidene t-butylamine N-oxide | 1.74 | 1.66 | 0.08 |
| 4-Methyl-beta-nitrostyrene | 2.66 | 2.55 | 0.11 |
| 4-Methylcyclohexanone | 1.38 | 1.79 | -0.41 |
| 4-Methyldibenzothiophene | 4.8 | 4.85 | -0.05 |
| 4-Methylformanilide | 1.61 | 1.61 | 0.00 |
| 4-Methyl-N-nitrosopiperazine | 0.2 | -0.57 | 0.77 |
| 4-Methyl-N-nitrosopiperidine | 1.05 | 1.08 | -0.03 |
| 4-Methylphenoxyacetic acid | 1.86 | 1.81 | 0.05 |
| 4-Methylphenylacetic acid | 1.86 | 2.23 | -0.37 |
| 4-Methylphenylisothiocyanate | 3.92 | 3.52 | 0.40 |
| 4-Methylpyridine | 1.22 | 1.22 | 0.00 |
| 4-Methylstyrene | 3.35 | 3.31 | 0.04 |
| 4-Methylsulfonylbenzoic acid | 0.67 | 0.44 | 0.23 |
| 4-Methylumbelliferon | 1.58 | 2.47 | -0.89 |
| 4-Methylvaleronitrile | 1.54 | 1.9 | -0.36 |
| 4-Nitroacetanilide | 1.66 | 1.35 | 0.31 |
| 4-Nitroacetophenone | 1.49 | 1.58 | -0.09 |
| 4-Nitroaniline | 1.37 | 1.19 | 0.18 |
| 4-Nitroanisole | 2.03 | 2.03 | 0.00 |
| 4-Nitrobenzaldehyde | 1.56 | 1.44 | 0.12 |
| 4-Nitrobenzamide | 0.82 | 0.43 | 0.39 |
| 4-Nitrobenzenesulfonamide | 0.64 | 0.33 | 0.31 |
| 4-Nitrobenzoic acid | 1.89 | 1.32 | 0.57 |
| 4-Nitrobenzonitrile | 1.19 | 1.47 | -0.28 |
| 4-Nitrobenzylalcohol | 1.26 | 1.11 | 0.15 |
| 4-Nitroformanilide | 1.43 | 1.14 | 0.29 |
| 4-Nitrophenetole | 2.53 | 2.46 | 0.07 |
| 4-Nitrophenol | 1.91 | 1.7 | 0.21 |
| 4-Nitrophenoxyacetic acid | 1.48 | 1.34 | 0.14 |
| 4-Nitrophenyl N-methylcarbamate | 1.47 | 1.32 | 0.15 |
| 4-Nitrophenylacetate | 1.49 | 2.05 | -0.56 |
| 4-Nitrophenylacetic acid | 1.39 | 1.76 | -0.37 |
| 4-Nitrophenylisothiocyanate | 3.62 | 3.05 | 0.57 |
| 4-Nitrophthalic acid | 1 | 0.39 | 0.61 |
| 4-Nitropyrazole | 0.59 | 0.52 | 0.07 |
| 4-Nitropyridine | 0.48 | 0.75 | -0.27 |
| 4-Nitroquinoline | 2.06 | 2.15 | -0.09 |
| 4-Nitroquinoline-1-oxide | 1.02 | 0.76 | 0.26 |
| 4-Nitrotoluene | 2.42 | 2.44 | -0.02 |
| 4-Nonylphenol | 4.48 | 5.69 | -1.21 |
| 4-Octanol | 2.68 | 2.61 | 0.07 |
| 4-Octylphenol | 4.12 | 5.25 | -1.13 |
| 4-Pentoxyphenol | 3.26 | 3.51 | -0.25 |
| 4-Pentylpyrazole | 2.96 | 3.22 | -0.26 |
| 4-Pentyn-2-ol | 0.12 | 0.51 | -0.39 |
| 4-Phenoxybenzoic acid | 3.21 | 3.08 | 0.13 |
| 4-Phenyl-1-butanol | 2.35 | 2.56 | -0.21 |
| 4-Phenylbut-3-en-2-one | 2.07 | 2.19 | -0.12 |
| 4-Phenylbutylamine | 2.39 | 2.47 | -0.08 |
| 4-Phenylbutyramide | 1.41 | 1.88 | -0.47 |
| 4-Phenylbutyric acid | 2.42 | 2.77 | -0.35 |
| 4-Phenylbutyric acid methylester | 2.77 | 3.1 | -0.33 |
| 4-Phenylbutyronitrile | 2.21 | 2.92 | -0.71 |
| 4-Phenyl-N-nitrosopiperidine | 2.59 | 2.38 | 0.21 |
| 4-Phenylpyridine | 2.45 | 2.52 | -0.07 |
| 4-Phenyltoluene | 4.63 | 4.47 | 0.16 |
| 4-Propionylphenyl N-methylcarbamate | 1.55 | 1.37 | 0.18 |
| 4-Propoylpyridine | 0.77 | 0.8 | -0.03 |
| 4-Propylbenzenesulfonamide | 1.64 | 1.68 | -0.04 |
| 4-Propylphenol | 3.2 | 3.05 | 0.15 |
| 4-Propylpyridine | 2.1 | 2.1 | 0.00 |
| 4-Pyridinemethanamine | -0.38 | -0.2 | -0.18 |
| 4-Pyridinemethanol | 0.06 | -0.11 | 0.17 |
| 4-Quinolone | 0.58 | 1.27 | -0.69 |
| 4-s-Butylphenoxyacetic acid | 3.12 | 2.97 | 0.15 |
| 4-s-Butylphenyl N-methylcarbamate | 3.2 | 2.95 | 0.25 |
| 4-Sulfamidobenzoic acid propylester | 1.75 | 0.88 | 0.87 |
| 4-t-Butyl-3-methylphenyl N-methylcarbamate | 3.38 | 3.21 | 0.17 |
| 4-t-Butyl-N-nitrosopiperidine | 1.96 | 2.16 | -0.20 |
| 4-t-Butylphenol | 3.31 | 3.25 | 0.06 |
| 4-t-Butylphenyl N-methylcarbamate | 3.06 | 2.87 | 0.19 |
| 4-t-Butyltoluene | 5.17 | 4.21 | 0.96 |
| 4-Thiocresol | 3.27 | 2.54 | 0.73 |
| 4-Tolyl N-methylcarbamate | 1.66 | 1.79 | -0.13 |
| 4-Tolylacetate | 2.11 | 2.52 | -0.41 |
| 4-Trifluoromethylaniline | 1.95 | 2.25 | -0.30 |
| 4-Trifluoromethylbenzamide | 1.71 | 1.49 | 0.22 |
| 4-Trifluoromethylphenylacetic acid | 2.45 | 2.82 | -0.37 |
| 5-(2-Pyridyl)pentamide | 0.39 | 1.01 | -0.62 |
| 5-(2-Pyridyl)pentanol | 1.28 | 1.69 | -0.41 |
| 5-(2-Pyridyl)pentylamine | 1.32 | 1.6 | -0.28 |
| 5-(3-Pyridyl)pentamide | 0.4 | 0.97 | -0.57 |
| 5-(3-Pyridyl)pentanol | 1.41 | 1.65 | -0.24 |
| 5-(3-Pyridyl)pentylamine | 1.41 | 1.56 | -0.15 |
| 5-(4-Pyridyl)pentamide | 0.42 | 0.97 | -0.55 |
| 5-(4-Pyridyl)pentanol | 1.39 | 1.65 | -0.26 |
| 5-(4-Pyridyl)pentylamine | 1.4 | 1.56 | -0.16 |
| 5,5-Diphenylhydantoin | 2.47 | 2.42 | 0.05 |
| 5,6-Dibromo-2-trifluoromethylbenzimidazole | 4.15 | 3.72 | 0.43 |
| 5,6-Dichloro-2-trifluoromethylbenzimidazole | 3.99 | 3.48 | 0.51 |
| 5,6-Dichlorovanillin | 2.47 | 2.16 | 0.31 |
| 5,6-Dimethylbenzimidazole | 2.35 | 1.94 | 0.41 |
| 5,8-Dihydroxy-4-methylquinoline | 1.59 | 1.82 | -0.23 |
| 5-Allyl-5-butylbarbituric acid | 1.35 | 1.54 | -0.19 |
| 5-Allyl-5-ethylbarbituric acid | 0.95 | 0.66 | 0.29 |
| 5-Amino-1-pentanol | -0.53 | -0.16 | -0.37 |
| 5-Aminoquinoline | 1.16 | 1.37 | -0.21 |
| 5-Amyl-5-ethylbarbituric acid | 2.24 | 1.76 | 0.48 |
| 5-Azauracil | -1.87 | -0.85 | -1.02 |
| 5-Bromo-2-trifluoromethylbenzimidazole | 3.57 | 3.07 | 0.50 |
| 5-Bromoindole | 3 | 2.78 | 0.22 |
| 5-Bromopentyl acetate | 2.15 | 2.37 | -0.22 |
| 5-Bromosalicylic acid | 2.87 | 2.21 | 0.66 |
| 5-Bromouracil | -0.21 | 0.03 | -0.24 |
| 5-Bromovaleric acid | 1.21 | 1.61 | -0.40 |
| 5-Bromovaleronitrile | 1.05 | 1.76 | -0.71 |
| 5-Butyl-N-methylbarbituric acid | 1.1 | 0.41 | 0.69 |
| 5-Chloro-1-phenyltetrazole | 1.48 | 1.99 | -0.51 |
| 5-Chloro-2-methylthiobenzimidazole | 3.22 | 2.73 | 0.49 |
| 5-Chloro-2-trifluoromethylbenzimidazole | 3.39 | 2.95 | 0.44 |
| 5-Chloro-6-nitro-2-trifluoromethylbenzimidazole | 3.21 | 2.82 | 0.39 |
| 5-Chloropentylacetate | 2.01 | 2.29 | -0.28 |
| 5-Chloroquinoxaline | 1.75 | 1.86 | -0.11 |
| 5-Chlorouracil | -0.35 | -0.1 | -0.25 |
| 5-Chlorovaleric acid | 1.07 | 1.53 | -0.46 |
| 5-Chlorovaleronitrile | 0.91 | 1.68 | -0.77 |
| 5-Chlorovanillin | 1.76 | 1.63 | 0.13 |
| 5-Dimethylamino-1,3,6-trimethyluracil | 0.99 | 0.29 | 0.70 |
| 5-Formyluracil | -1.03 | -1.26 | 0.23 |
| 5-Hexyn-2-one | 0.58 | 0.95 | -0.37 |
| 5-Hexyn-3-ol | 0.65 | 0.95 | -0.30 |
| 5-Methoxy-8-quinolinol | 2.06 | 1.81 | 0.25 |
| 5-Methoxyindole | 2.06 | 2.06 | 0.00 |
| 5-Methyl-1-hexyn-3-ol | 1.6 | 1.23 | 0.37 |
| 5-Methyl-4-nitroquinoline-1-oxide | 1.36 | 1.1 | 0.26 |
| 5-Methyl-5-hexen-2-one | 1.29 | 1.92 | -0.63 |
| 5-Methyl-8-quinolinol | 2.37 | 2.22 | 0.15 |
| 5-Methylindole | 2.68 | 2.47 | 0.21 |
| 5-Methylquinoxaline | 2.04 | 1.67 | 0.37 |
| 5-Methyluracil | -0.62 | -0.26 | -0.36 |
| 5-Nitro-2-trifluoromethylbenzimidazole | 2.68 | 2.29 | 0.39 |
| 5-Nitroimidazole | -0.16 | 0.41 | -0.57 |
| 5-Nitroquinoline | 1.86 | 2.15 | -0.29 |
| 5-Nitroquinoline-1-oxide | 0.49 | 0.76 | -0.27 |
| 5-Nitrosalicylic acid | 2.34 | 1.43 | 0.91 |
| 5-Nonanone | 2.88 | 3.05 | -0.17 |
| 5-Octyn-3-ol | 1.71 | 2.13 | -0.42 |
| 5-Phenyl-2-pentanone | 2.42 | 3.03 | -0.61 |
| 5-Phenylvaleric acid | 2.92 | 3.21 | -0.29 |
| 5-t-Butyl-3-methylphenyl N-methylcarbamate | 3.35 | 3.21 | 0.14 |
| 5-t-Butyl-4-hydroxy-2-methylacetanilide | 2.67 | 2.84 | -0.17 |
| 6,7-Dimethyl-1,4-naphthoquinone | 2.49 | 1.81 | 0.68 |
| 6-Amino-1-hexanol | -0.01 | 0.28 | -0.29 |
| 6-Aminopurine | -0.09 | -0.35 | 0.26 |
| 6-Aminoquinoline | 1.28 | 1.37 | -0.09 |
| 6-Azauracil | -0.59 | -0.2 | -0.39 |
| 6-Bromo-1-hexanol | 1.73 | 1.84 | -0.11 |
| 6-Bromohexanoic acid | 1.74 | 2.05 | -0.31 |
| 6-Bromoquinoline | 2.83 | 2.93 | -0.10 |
| 6-Chloro-1-hexanol | 1.59 | 1.76 | -0.17 |
| 6-Chloro-1-methyl-4-phenylquinazolin-2-one | 2.38 | 3.06 | -0.68 |
| 6-Chloro-4-nitroquinoline-1-oxide | 1.41 | 1.29 | 0.12 |
| 6-Chloroquinoline | 2.73 | 2.81 | -0.08 |
| 6-Chloroquinoxaline | 2.1 | 1.86 | 0.24 |
| 6-Chlorovanillin | 1.76 | 1.63 | 0.13 |
| 6-Cyanoquinoxaline | 1.01 | 0.7 | 0.31 |
| 6-Fluoro-1-methyl-4-phenylquinazolin-2-one | 1.87 | 2.55 | -0.68 |
| 6-Hydroxy-1-methyl-4-phenylquinazolin-2-one | 1.72 | 2.13 | -0.41 |
| 6-Isopropyl-3-methylphenyl N-methylcarbamate | 2.84 | 2.85 | -0.01 |
| 6-Mercaptopurine | -0.18 | 0.19 | -0.37 |
| 6-Methoxyquinoline | 2.2 | 2.21 | -0.01 |
| 6-Methyl-1,4-naphthoquinone | 2.1 | 1.47 | 0.63 |
| 6-Methyl-4-nitroquinoline-1-oxide | 1.43 | 1.1 | 0.33 |
| 6-Methylquinoline | 2.57 | 2.62 | -0.05 |
| 6-Nitroquinoline | 1.84 | 2.15 | -0.31 |
| 6-Nitroquinoline-1-oxide | 0.39 | 0.76 | -0.37 |
| 6-t-Butyl-3-methylphenyl N-methylcarbamate | 3.14 | 3.21 | -0.07 |
| 7,12-Dimethylbenz[a]anthracene | 5.8 | 6.31 | -0.51 |
| 7-Azaindole | 1.82 | 1.62 | 0.20 |
| 7-Bromoheptanenitrile | 2.1 | 2.64 | -0.54 |
| 7-Bromoquinoline | 2.92 | 2.93 | -0.01 |
| 7-Chloro-1-methyl-4-phenylquinazolin-2-one | 2.36 | 3.06 | -0.70 |
| 7-Chloroheptanonitrile | 1.96 | 2.56 | -0.60 |
| 7-Dimethylaminoquinoline | 2.71 | 1.97 | 0.74 |
| 7-Methoxyquinoline | 2.37 | 2.21 | 0.16 |
| 7-Methyl-4-nitroquinoline-1-oxide | 1.42 | 1.1 | 0.32 |
| 7-Methylquinoline | 2.47 | 2.62 | -0.15 |
| 7-Nitroquinoline | 1.82 | 2.15 | -0.33 |
| 7-Nitroquinoline-1-oxide | 0.36 | 0.76 | -0.40 |
| 7-Tridecanone | 5.08 | 4.81 | 0.27 |
| 7-Trifluoromethylquinoline | 3.02 | 3.21 | -0.19 |
| 8-Aminoquinoline | 1.79 | 1.37 | 0.42 |
| 8-Bromo-1-octanol | 2.79 | 2.72 | 0.07 |
| 8-Bromooctanoic acid | 2.79 | 2.93 | -0.14 |
| 8-Chloro-1-octanol | 2.65 | 2.64 | 0.01 |
| 8-Chloroquinoline | 2.33 | 2.81 | -0.48 |
| 8-Fluoro-4-nitroquinoline-1-oxide | 1 | 0.78 | 0.22 |
| 8-Methoxyquinoline | 1.84 | 2.21 | -0.37 |
| 8-Methyl-4-nitroquinoline-1-oxide | 1.59 | 1.1 | 0.49 |
| 8-Methylquinoline | 2.6 | 2.62 | -0.02 |
| 8-Nitroquinoline | 1.4 | 2.15 | -0.75 |
| 8-Nitroquinoline-1-oxide | 0.04 | 0.76 | -0.72 |
| 8-Quinolinol | 2 | 1.88 | 0.12 |
| 8-Sulfonamidoquinoline | 0.36 | 1.02 | -0.66 |
| 8-Trifluoromethylquinoline | 2.5 | 3.21 | -0.71 |
| 9-(1-(hydroxymethyl)butyl)adenine | 0.66 | 0.34 | 0.32 |
| 9,10-Benzophenanthrene | 5.49 | 5.59 | -0.10 |
| 9,10-Dihydroanthracene | 4.25 | 5.17 | -0.92 |
| 9,10-Dimethylanthracene | 5.69 | 5.23 | 0.46 |
| 9-Acetylcarbazole | 3.45 | 2.98 | 0.47 |
| 9-Acridinamine | 2.74 | 2.77 | -0.03 |
| 9-Anthracenol | 3.61 | 3.83 | -0.22 |
| 9-Butyladenine | 1.25 | 1.24 | 0.01 |
| 9H-Fluoren-9-imine | 2.43 | 3.09 | -0.66 |
| 9H-Fluoren-9-one | 3.58 | 3.15 | 0.43 |
| 9-Methylanthracene | 5.07 | 4.87 | 0.20 |
| 9-Pentyladenine | 1.79 | 1.68 | 0.11 |
| 9-Propyladenine | 0.74 | 0.8 | -0.06 |
| Abstral | 4.05 | 4.53 | -0.48 |
| Accuretic | -0.03 | 0.06 | -0.09 |
| Acebutolol | 1.77 | 1.31 | 0.46 |
| Acenaphthene | 3.92 | 4.35 | -0.43 |
| Acenaphthylene | 4.03 | 4.09 | -0.06 |
| Acetaldehyde | 0.45 | 0.27 | 0.18 |
| Acetamide | -1.26 | -0.74 | -0.52 |
| Acetanilide | 1.16 | 1.48 | -0.32 |
| Acethydrazide | -1.58 | -1.03 | -0.55 |
| Acetic acid | -0.17 | 0.15 | -0.32 |
| Acetone oxime | 0.12 | 0.14 | -0.02 |
| Acetonitrile | -0.34 | 0.3 | -0.64 |
| Acetonylacetone | -0.27 | 0.43 | -0.70 |
| Acetophenone | 1.63 | 1.71 | -0.08 |
| Acetylacetone | 0.4 | -0.01 | 0.41 |
| Acetylsulfanilamide | -0.96 | -0.29 | -0.67 |
| Acetylthiobenzene | 2.23 | 2.32 | -0.09 |
| Aciclovir | -1.56 | -1.43 | -0.13 |
| Acrylamide | -0.67 | -0.52 | -0.15 |
| Acrylic acid | 0.35 | 0.37 | -0.02 |
| Acticin | 6.5 | 6.58 | -0.08 |
| Actidione | 0.55 | 0.86 | -0.31 |
| Actiprofen | 3.51 | 3.67 | -0.16 |
| Acular | 2.1 | 2.76 | -0.66 |
| Adazine | 5.19 | 5.39 | -0.20 |
| Adrucil | -0.95 | -0.92 | -0.03 |
| Akineton | 4.25 | 4.54 | -0.29 |
| Alachlor | 3.52 | 3.11 | 0.41 |
| Alclofenac | 2.47 | 3 | -0.53 |
| Aldosterone | 1.08 | 1.37 | -0.29 |
| Aldrin | 6.5 | 6.25 | 0.25 |
| Allobarbital | 1.07 | 0.88 | 0.19 |
| Allyl alcohol | 0.17 | 0.16 | 0.01 |
| Allyl bromide | 1.79 | 1.63 | 0.16 |
| Allyl butyrate | 1.81 | 2.01 | -0.20 |
| Allyl chloride | 1.69 | 1.55 | 0.14 |
| Allyl cyanide | 0.4 | 0.96 | -0.56 |
| Allyl heptanoate | 3.4 | 3.33 | 0.07 |
| Allyl hexanoate | 2.87 | 2.89 | -0.02 |
| Allyl phenyl ether | 2.94 | 2.81 | 0.13 |
| Allyl propanoate | 1.28 | 1.57 | -0.29 |
| Allylamine | 0.07 | 0.07 | 0.00 |
| Allylethylamine | 0.81 | 1.03 | -0.22 |
| Allylisopropylacetamide | 1.14 | 1.62 | -0.48 |
| Allylpropylamine | 1.33 | 1.47 | -0.14 |
| alpha,alpha-Dimethylphenethylamine | 1.9 | 2.42 | -0.52 |
| alpha-Chloroisovalerylurea | 1 | 0.78 | 0.22 |
| alpha-D-Arabinopyranose | -3.02 | -2.42 | -0.60 |
| alpha-Estradiol | 4.01 | 4.23 | -0.22 |
| alpha-Hydroxybenzylpenicillin | 1.4 | 0.6 | 0.80 |
| alpha-Hydroxybutyric acid | -0.36 | -0.27 | -0.09 |
| alpha-Ionone | 3.85 | 3.5 | 0.35 |
| alpha-Methyl benzylamine | 1.4 | 1.58 | -0.18 |
| alpha-Methylstyrene | 3.48 | 3.38 | 0.10 |
| alpha-Pinene | 4.44 | 3.98 | 0.46 |
| alpha-Terpinene | 4.25 | 4.17 | 0.08 |
| Alprazolam | 4.9 | 4.97 | -0.07 |
| Alprenolol | 3.1 | 2.7 | 0.40 |
| Ametryn | 2.98 | 3.16 | -0.18 |
| Aminocarb | 1.9 | 1.48 | 0.42 |
| Aminopyrazine | -0.07 | -0.54 | 0.47 |
| Aminopyrine | 0.85 | 0.94 | -0.09 |
| Amlodipine | 3.74 | 3.46 | 0.28 |
| Amoxicillin | -1.71 | -2.01 | 0.30 |
| Ampicillin | -2.17 | -1.61 | -0.56 |
| Amyl acetate | 2.3 | 2.23 | 0.07 |
| Amyl formate | 1.79 | 1.69 | 0.10 |
| Amyl propionate | 2.83 | 2.67 | 0.16 |
| Amylamine | 1.49 | 1.17 | 0.32 |
| Amylbenzene | 4.9 | 4.55 | 0.35 |
| Amylisothiocyanate | 3.48 | 3.55 | -0.07 |
| Amylobarbitone | 2.07 | 1.6 | 0.47 |
| Anabasine | 0.97 | 1.13 | -0.16 |
| Aniline | 0.94 | 1.32 | -0.38 |
| Anise alcohol | 1.1 | 1.17 | -0.07 |
| Anisole | 2.11 | 2.16 | -0.05 |
| Anthracene | 4.5 | 4.51 | -0.01 |
| Antipyrine | 0.23 | 0.87 | -0.64 |
| Aprobarbital | 1.37 | 0.94 | 0.43 |
| Arabinose | -3.02 | -2.93 | -0.09 |
| Arabinosylhypoxanthine | -2.08 | -2.24 | 0.16 |
| Arbutin | -1.35 | -0.52 | -0.83 |
| Arformoterol | 1.91 | 1.99 | -0.08 |
| Aspartic acid | -3.7 | -3.09 | -0.61 |
| Aspirin | 1.23 | 1.91 | -0.68 |
| Astemizole | 5.8 | 5.73 | 0.07 |
| Atenolol | 0.16 | 0.47 | -0.31 |
| Atomoxetine | 3.7 | 4.13 | -0.43 |
| Atrazine | 2.61 | 2.61 | 0.00 |
| Azanidazole | 0.85 | 0.12 | 0.73 |
| Azatadine | 3.59 | 4.47 | -0.88 |
| Azathioprine | 1.07 | 1.05 | 0.02 |
| Azulene | 3.2 | 3.57 | -0.37 |
| Azulfidine | 3.61 | 3.29 | 0.32 |
| Baclofen | -0.96 | -0.33 | -0.63 |
| Bactrim | 0.88 | 1.4 | -0.52 |
| Banzel | 0.9 | 0.26 | 0.64 |
| Barbital | 0.65 | 0.44 | 0.21 |
| Barbituric acid | -1.44 | -1.08 | -0.36 |
| Bayleton | 3.26 | 3.57 | -0.31 |
| BCNU | 1.53 | 1.37 | 0.16 |
| Benadryl | 3.27 | 3.6 | -0.33 |
| Benalaxyl | 3.4 | 3.98 | -0.58 |
| Bendroflumethiazide | 1.19 | 1.62 | -0.43 |
| Benefin | 5.29 | 4.57 | 0.72 |
| Benomyl | 2.12 | 2.39 | -0.27 |
| Benorylate | 2.15 | 2.68 | -0.53 |
| Bensulfuron-methyl | 2.45 | 2.21 | 0.24 |
| Bentazone | 2.83 | 2.69 | 0.14 |
| Benz[a]anthracene | 5.79 | 5.59 | 0.20 |
| Benz[e]acephenanthrylene | 5.78 | 6.41 | -0.63 |
| Benzalacetophenone | 3.08 | 3.49 | -0.41 |
| Benzalcyanoacetamide | 1.5 | 0.48 | 1.02 |
| Benzaldehyde | 1.48 | 1.57 | -0.09 |
| Benzalmalonodiamide | -0.13 | -0.56 | 0.43 |
| Benzalmalonodinitrile | 2.12 | 1.52 | 0.60 |
| Benzamide | 0.64 | 0.56 | 0.08 |
| Benzanilide | 2.7 | 2.78 | -0.08 |
| Benzedrine | 1.76 | 2.02 | -0.26 |
| Benzene | 2.13 | 2.35 | -0.22 |
| Benzenecarbothioamide | 1.49 | 0.89 | 0.60 |
| Benzenesulfonamide | 0.31 | 0.46 | -0.15 |
| Benzenethiol | 2.52 | 2.2 | 0.32 |
| Benzimidazole | 1.32 | 1.26 | 0.06 |
| Benzimidazole-2-thione | 1.66 | 1.68 | -0.02 |
| Benzo[a]fluorene | 5.68 | 5.79 | -0.11 |
| Benzo[a]naphthacene | 6.81 | 6.67 | 0.14 |
| Benzo[a]phenanthrene | 5.73 | 5.59 | 0.14 |
| Benzo[a]pyrene | 5.97 | 6.13 | -0.16 |
| Benzo[b]fluorene | 5.77 | 5.79 | -0.02 |
| Benzo[b]furan | 2.67 | 2.67 | 0.00 |
| Benzo[b]triphenylene | 6.17 | 6.67 | -0.50 |
| Benzo[e]pyrene | 6.44 | 6.13 | 0.31 |
| Benzo[f]quinoline | 3.25 | 3.28 | -0.03 |
| Benzo[g,h,i]perylene | 6.63 | 6.67 | -0.04 |
| Benzo[ghi]fluoranthene | 5.78 | 5.73 | 0.05 |
| Benzo[j]fluoranthene | 6.4 | 6.41 | -0.01 |
| Benzo[k]fluoranthene | 6.11 | 6.41 | -0.30 |
| Benzohydroxamic acid | 0.26 | 0.14 | 0.12 |
| Benzoic acid | 1.87 | 1.45 | 0.42 |
| Benzonitrile | 1.56 | 1.6 | -0.04 |
| Benzophenone | 3.18 | 3.01 | 0.17 |
| Benzothiazole | 2.02 | 1.95 | 0.07 |
| Benzotrifluoride | 3.01 | 3.16 | -0.15 |
| Benzoylhydrazine | 0.19 | 0.27 | -0.08 |
| Benzyl acetate | 1.96 | 2.21 | -0.25 |
| Benzyl benzoate | 3.97 | 3.51 | 0.46 |
| Benzyl butyl phthalate | 4.59 | 4.37 | 0.22 |
| Benzyl ethyl ether | 2.16 | 2.43 | -0.27 |
| Benzyl methyl ether | 1.35 | 2 | -0.65 |
| Benzylamine | 1.09 | 1.15 | -0.06 |
| Benzylaniline | 3.13 | 3.43 | -0.30 |
| Benzylisothiocyanate | 2.83 | 3.53 | -0.70 |
| Benzylmethylamine | 1.52 | 1.56 | -0.04 |
| Benzylpenicillin | 1.83 | 1.9 | -0.07 |
| Benzylphenylether | 3.79 | 3.89 | -0.10 |
| Benzylthiocyanate | 1.99 | 2.36 | -0.37 |
| beta-Ethyl-beta-nitrostyrene | 2.86 | 2.96 | -0.10 |
| beta-HCH | 3.78 | 4.03 | -0.25 |
| beta-Ionone | 3.84 | 3.63 | 0.21 |
| Betamethasone | 2.06 | 1.91 | 0.15 |
| beta-Nitrostyrene | 2.24 | 2.21 | 0.03 |
| beta-Resorcylic acid | 1.44 | 1.16 | 0.28 |
| Bevantolol | 3 | 3.21 | -0.21 |
| Bifenox | 4.48 | 4.34 | 0.14 |
| Bifonazole | 4.77 | 4.43 | 0.34 |
| Biphenyl | 4.01 | 4.11 | -0.10 |
| Bis(2-chloroethyl) ether | 1.29 | 1.25 | 0.04 |
| Bis(2-hydroxyethyl)methylamine | -1.04 | -1.18 | 0.14 |
| Bisoprolol | 2.15 | 2.23 | -0.08 |
| Bisphenol A | 3.42 | 4.15 | -0.73 |
| Bitertanol | 4.16 | 4.32 | -0.16 |
| Bornyl acetate | 4.3 | 3.38 | 0.92 |
| Bremazocine | 3.2 | 4.13 | -0.93 |
| Brethine | 1.4 | 1.28 | 0.12 |
| Bromacil | 2.11 | 2.45 | -0.34 |
| Bromazepam | 1.65 | 1.64 | 0.01 |
| Bromoacetamide | -0.52 | -0.6 | 0.08 |
| Bromoacetic acid | 0.41 | 0.29 | 0.12 |
| Bromoacetonitrile | 0.36 | 0.44 | -0.08 |
| Bromobenzene | 2.99 | 2.88 | 0.11 |
| Bromocyclohexane | 3.2 | 2.9 | 0.30 |
| Bromoethane | 1.61 | 1.41 | 0.20 |
| Bromoperidol | 3.65 | 3.91 | -0.26 |
| Bromophos | 5.21 | 4.83 | 0.38 |
| Bromophos-ethyl | 6.15 | 5.69 | 0.46 |
| Broxuridine | -0.29 | -0.83 | 0.54 |
| Budeprion | 3.21 | 3.04 | 0.17 |
| Bufexamac | 1.47 | 1.82 | -0.35 |
| Bumetanide | 1.96 | 2.09 | -0.13 |
| Bunitrolol | 1.91 | 1.47 | 0.44 |
| Bunolol | 2.4 | 2.42 | -0.02 |
| Bupirimate | 2.7 | 2.73 | -0.03 |
| Bupranolol | 2.97 | 3.48 | -0.51 |
| Buspirone | 2.3 | 1.61 | 0.69 |
| Butachlor | 4.5 | 4.8 | -0.30 |
| Butanal | 0.88 | 1.15 | -0.27 |
| Butanamide | -0.21 | 0.14 | -0.35 |
| Butane | 2.89 | 2.51 | 0.38 |
| Butanedioic acid | -0.59 | -0.24 | -0.35 |
| Butanoic acid | 0.79 | 1.03 | -0.24 |
| Butanoic anhydride | 1.39 | 2.26 | -0.87 |
| Butobarbitone | 1.73 | 1.32 | 0.41 |
| Butralin | 4.54 | 4.67 | -0.13 |
| Butyl 4-hydroxybenzoate | 3.57 | 2.69 | 0.88 |
| Butyl butanoate | 2.83 | 2.67 | 0.16 |
| Butyl propanoate | 2.3 | 2.23 | 0.07 |
| Butyl thiocyanate | 2.03 | 1.94 | 0.09 |
| Butyl-1,2-dinitrate | 2.36 | 2.76 | -0.40 |
| Butylate | 4.15 | 3.79 | 0.36 |
| Butylbenzene | 4.26 | 4.09 | 0.17 |
| Butylcellosolve | 0.83 | 0.68 | 0.15 |
| Butyldimethylamine | 1.7 | 1.55 | 0.15 |
| Butylisothiocyanate | 2.92 | 3.11 | -0.19 |
| Butylmethylamine | 1.33 | 1.14 | 0.19 |
| Butylmethylketone | 1.38 | 1.73 | -0.35 |
| Butylnitrate | 2.15 | 2.23 | -0.08 |
| Butylpropylamine | 2.12 | 2.13 | -0.01 |
| Butyranilide | 2.05 | 2.36 | -0.31 |
| Butyric acid hydrazide | -0.62 | -0.15 | -0.47 |
| Butyric acid methylester | 1.29 | 1.36 | -0.07 |
| Butyronitrile | 0.6 | 1.18 | -0.58 |
| Butyrophenone | 2.77 | 2.59 | 0.18 |
| Caffeine | -0.07 | -0.29 | 0.22 |
| Camphene | 4.22 | 4.02 | 0.20 |
| Camphorquinone | 1.52 | 1.53 | -0.01 |
| Capraldehyde | 4.01 | 3.79 | 0.22 |
| Caproic aldehyde | 1.78 | 2.03 | -0.25 |
| Caprolactone | 0.31 | 1.43 | -1.12 |
| Caprylene | 4.57 | 3.85 | 0.72 |
| Caprylic aldehyde | 2.95 | 2.91 | 0.04 |
| Caprylonitrile | 2.75 | 2.94 | -0.19 |
| Captopril | 1.02 | 0.68 | 0.34 |
| Carazolol | 3.73 | 3.15 | 0.58 |
| Carbamazepine | 2.45 | 2.9 | -0.45 |
| Carbaril | 2.36 | 2.45 | -0.09 |
| Carbazole | 3.72 | 3.68 | 0.04 |
| Carbendazim | 1.52 | 1.45 | 0.07 |
| Carbenicillin | 1.13 | 1.42 | -0.29 |
| Carbofuran | 2.32 | 2.45 | -0.13 |
| Carbophenothion | 5.33 | 5.33 | 0.00 |
| Carbophos | 2.36 | 2.54 | -0.18 |
| Carbostyril | 1.26 | 1.76 | -0.50 |
| Carbromal | 1.54 | 1.11 | 0.43 |
| Carbutamide | 1.01 | 1.34 | -0.33 |
| Carfecillin | 2.96 | 3.6 | -0.64 |
| Carvedilol | 4.14 | 3.97 | 0.17 |
| Carvone | 2.71 | 2.71 | 0.00 |
| Cathine | 0.67 | 0.72 | -0.05 |
| Cefacetrile | -0.45 | -0.38 | -0.07 |
| Cefaclor | -1.79 | -1.1 | -0.69 |
| Cefixime | 0.11 | 0.03 | 0.08 |
| Cefmetazole | -0.6 | -0.97 | 0.37 |
| Cefobid | -0.74 | -1.06 | 0.32 |
| Cefuroxime | -0.16 | 0 | -0.16 |
| Celebrex | 3.9 | 4.17 | -0.27 |
| Celiprolol | 1.92 | 1.97 | -0.05 |
| Cephamandole | 0.5 | -0.03 | 0.53 |
| Cetamolol | 1.36 | 0.71 | 0.65 |
| Cetane | 8.86 | 8.87 | -0.01 |
| Chloral | 0.99 | 1.6 | -0.61 |
| Chloral hydrate | 0.99 | 0.65 | 0.34 |
| Chloramben | 1.11 | 1.6 | -0.49 |
| Chlorazine | 3.24 | 3.96 | -0.72 |
| Chlorbromuron | 3.09 | 3.12 | -0.03 |
| Chlordane | 6.2 | 6.25 | -0.05 |
| Chlorfenidim | 1.94 | 2.05 | -0.11 |
| Chlorflurazole | 3.49 | 3.48 | 0.01 |
| Chlorguanide | 2.53 | 2.39 | 0.14 |
| Chlorimuron-ethyl | 2.7 | 2.31 | 0.39 |
| Chlorinate | 2.68 | 3.13 | -0.45 |
| Chlormidazole | 4.36 | 4.1 | 0.26 |
| Chloroacetamide | -0.53 | -0.68 | 0.15 |
| Chloroacetic acid | 0.22 | 0.21 | 0.01 |
| Chloroacetic acid ethylester | 0.94 | 0.97 | -0.03 |
| Chloroacetonitrile | 0.45 | 0.36 | 0.09 |
| Chloroambucil | 3.7 | 3.68 | 0.02 |
| Chlorobenzene | 2.84 | 2.76 | 0.08 |
| Chlorobutanol | 2.03 | 1.95 | 0.08 |
| Chloroethane | 1.43 | 1.33 | 0.10 |
| Chloromycetin | 1.14 | 0.91 | 0.23 |
| Chloroprene | 2.03 | 2.28 | -0.25 |
| Chloropropham | 3.51 | 3.14 | 0.37 |
| Chloroquine | 4.69 | 4.52 | 0.17 |
| Chlorothalonil | 2.9 | 3.09 | -0.19 |
| Chlorothiazide | -0.24 | -0.85 | 0.61 |
| Chloroxylenol | 3.27 | 3.04 | 0.23 |
| Chlorphenamine | 3.39 | 3.65 | -0.26 |
| Chlorpromazine | 5.19 | 4.99 | 0.20 |
| Chlorpropamide | 2.27 | 1.83 | 0.44 |
| Chlorprothixene | 6.03 | 5.77 | 0.26 |
| Chlorpyrifos-methyl | 4.31 | 4.62 | -0.31 |
| Chlorpyriphos | 5.27 | 5.48 | -0.21 |
| Chlorsulfuron | 1.79 | 1.85 | -0.06 |
| Chlortalidone | 0.24 | 0.5 | -0.26 |
| Chlortoluron | 2.41 | 2.39 | 0.02 |
| Cimetidine | 0.4 | 0.81 | -0.41 |
| Cinnamaldehyde | 1.9 | 2.05 | -0.15 |
| Cinnamamide | 1.41 | 1.04 | 0.37 |
| Cinnamanilide | 3.61 | 3.26 | 0.35 |
| Cinnolin-4-one | 0.82 | 1.74 | -0.92 |
| Cinoxate | 2.29 | 2.48 | -0.19 |
| Ciprofloxacin | -1.08 | -1.05 | -0.03 |
| cis-1,2-Cyclohexyl dinitrate | 2.97 | 2.75 | 0.22 |
| cis-1,2-Dichloroethylene | 1.86 | 1.75 | 0.11 |
| cis-1,3-Cyclohexyl dinitrate | 2.66 | 2.75 | -0.09 |
| cis-1,3-Dichloropropene | 1.76 | 2.32 | -0.56 |
| cis-2,4,6-Trimethyl-1,3,5-trioxane | 0.67 | 0.82 | -0.15 |
| cis-2-Butene-1,4-diol | -0.81 | -0.65 | -0.16 |
| cis-2-Hexen-1-ol | 1.4 | 1.3 | 0.10 |
| cis-Crotyl alcohol | 0.34 | 0.42 | -0.08 |
| Clenbuterol | 2.94 | 2.23 | 0.71 |
| Cleocin | 2.16 | 1.52 | 0.64 |
| Clobazam | 2.12 | 2.41 | -0.29 |
| Clofazimine | 7.48 | 6.81 | 0.67 |
| Clofenotane | 6.91 | 6.98 | -0.07 |
| Clofibrate | 3.65 | 3.44 | 0.21 |
| Clofibric acid | 2.57 | 2.68 | -0.11 |
| Clomethiazole | 2.12 | 2.12 | 0.00 |
| Clomicalm | 5.19 | 5.23 | -0.04 |
| Clonazepam | 3.02 | 2.7 | 0.32 |
| Clonidine | 1.57 | 2.06 | -0.49 |
| Clotiazepam | 3.49 | 3.53 | -0.04 |
| Clotrimazole | 5.2 | 5.02 | 0.18 |
| Cloxapen | 2.43 | 2.92 | -0.49 |
| Clozapine | 3.9 | 3.02 | 0.88 |
| Colamine | -1.31 | -1.48 | 0.17 |
| Cordarone | 7.8 | 8.31 | -0.51 |
| Coronene | 6.7 | 7.21 | -0.51 |
| Cortexolone | 2.52 | 2.3 | 0.22 |
| Corticosterone | 1.94 | 2.37 | -0.43 |
| Cortisol | 1.61 | 1.26 | 0.35 |
| Cortisone | 1.47 | 1.28 | 0.19 |
| Coumarin | 1.39 | 2.46 | -1.07 |
| CPMC | 1.64 | 1.98 | -0.34 |
| Creatinine | -1.76 | -1.25 | -0.51 |
| Cromoglicic acid | 1.6 | 1 | 0.60 |
| Crotonic acid | 0.72 | 0.63 | 0.09 |
| Crotoxyphos | 3.3 | 2.45 | 0.85 |
| Cumene | 3.66 | 3.47 | 0.19 |
| Cyanazine | 2.22 | 2.04 | 0.18 |
| Cyanoethylene | 0.25 | 0.52 | -0.27 |
| Cycloheptane | 4 | 3.46 | 0.54 |
| Cyclohexane | 3.44 | 3.07 | 0.37 |
| Cyclohexanecarboxylic acid | 1.96 | 1.69 | 0.27 |
| Cyclohexanethiol | 2.68 | 2.53 | 0.15 |
| Cyclohexanol | 1.23 | 1.23 | 0.00 |
| Cyclohexanone | 0.81 | 1.51 | -0.70 |
| Cyclohexanone oxime | 1.19 | 1.24 | -0.05 |
| Cyclohexene | 2.86 | 2.67 | 0.19 |
| Cyclohexylamine | 1.49 | 1.1 | 0.39 |
| Cyclooctane | 4.45 | 3.85 | 0.60 |
| Cyclooctatetraene | 3.08 | 2.81 | 0.27 |
| Cyclopentane | 3 | 2.68 | 0.32 |
| Cyclopentanone | 0.38 | 1.21 | -0.83 |
| Cyclopropane | 1.72 | 1.9 | -0.18 |
| Cyclopropylbenzene | 3.27 | 3.39 | -0.12 |
| Cyclosarin | 1.04 | 1.24 | -0.20 |
| Cymperator | 6.05 | 6.08 | -0.03 |
| Cytarabine | -2.51 | -2.94 | 0.43 |
| Cytosine | -1.73 | -1.04 | -0.69 |
| Daraprim | 2.87 | 2.58 | 0.29 |
| DDD | 6.22 | 6.31 | -0.09 |
| DDE | 6.96 | 6.52 | 0.44 |
| Debrisoquine | 0.85 | 1.57 | -0.72 |
| Decabromodiphenyl ether | 9.97 | 10.36 | -0.39 |
| Decachlorodiphenyl ether | 8.16 | 9.16 | -1.00 |
| Decamethylcyclopentasiloxane | 8.07 | 8.03 | 0.04 |
| Decane | 5.8 | 5.69 | 0.11 |
| Decanedioic acid | 2.01 | 2.4 | -0.39 |
| Decyl-1,2-dinitrate | 5.88 | 5.4 | 0.48 |
| Decylbenzene | 6.94 | 6.85 | 0.09 |
| DEHP | 7.6 | 7.15 | 0.45 |
| delta-Decanolactone | 2.39 | 3.36 | -0.97 |
| delta-HCH | 4.14 | 4.03 | 0.11 |
| Deprenyl | 2.9 | 3.05 | -0.15 |
| Desipramine | 4 | 4.29 | -0.29 |
| Desmethyldiazepam | 2.93 | 2.83 | 0.10 |
| Devrinol | 3.36 | 3.75 | -0.39 |
| Dexamethasone | 2.01 | 1.91 | 0.10 |
| Dexamisole | 1.94 | 2.46 | -0.52 |
| Dexfenfluramine | 3.36 | 3.91 | -0.55 |
| Dexindoprofen | 2.77 | 2.82 | -0.05 |
| Dexsotalol | -0.47 | 0.45 | -0.92 |
| Dialifos | 4.69 | 4.12 | 0.57 |
| Diallylamine | 1.11 | 1.25 | -0.14 |
| Diamylamine | 3.76 | 3.45 | 0.31 |
| Dibenz[a,h]anthracene | 6.5 | 6.67 | -0.17 |
| Dibenz[a,j]anthracene | 7.11 | 6.67 | 0.44 |
| Dibenzo[b,d]thiophene | 4.38 | 4.51 | -0.13 |
| Dibenzo[b,e]pyridine | 3.4 | 3.68 | -0.28 |
| Dibenzofuran | 4.12 | 4 | 0.12 |
| Dibenzo-p-dioxin | 4.38 | 3.99 | 0.39 |
| Dibenzyl ether | 3.31 | 3.73 | -0.42 |
| Dibenzylamine | 2.67 | 3.41 | -0.74 |
| Dibutyl adipate | 3.9 | 4.07 | -0.17 |
| Dibutyl ether | 3.21 | 2.89 | 0.32 |
| Dibutyl phenyl phosphate | 4.27 | 4.06 | 0.21 |
| Dibutyl phthalate | 4.53 | 3.95 | 0.58 |
| Dibutyl suberate | 4.96 | 4.95 | 0.01 |
| Dibutyl succinate | 3.6 | 3.19 | 0.41 |
| Dibutylamine | 2.68 | 2.57 | 0.11 |
| Dibutylsulfide | 4.02 | 3.76 | 0.26 |
| Dibutylsulfoxide | 1.85 | 1.24 | 0.61 |
| Dichlorfenidim | 2.68 | 2.58 | 0.10 |
| Dichloroacetic acid | 0.92 | 0.81 | 0.11 |
| Dichloroacetonitrile | 0.93 | 0.96 | -0.03 |
| Diclofop-methyl | 4.8 | 4.96 | -0.16 |
| Dicloxacillin | 2.91 | 3.45 | -0.54 |
| Dicyanomethane | -0.6 | -0.23 | -0.37 |
| DIDP | 7.7 | 8.91 | -1.21 |
| Diethanolamine | -1.43 | -1.59 | 0.16 |
| Diethion | 5.07 | 5.11 | -0.04 |
| Diethyl 2-butylmalonate | 3.02 | 2.59 | 0.43 |
| Diethyl 3-oxopimelate | 1.49 | 1.45 | 0.04 |
| Diethyl 4-oxopimelate | 1.54 | 1.45 | 0.09 |
| Diethyl acetamidomalonate | 0.34 | -0.22 | 0.56 |
| Diethyl adipate | 1.79 | 2.31 | -0.52 |
| Diethyl allylmalonate | 2.01 | 1.93 | 0.08 |
| Diethyl benzylidenemalonate | 3.13 | 2.74 | 0.39 |
| Diethyl chloromalonate | 1.64 | 1.24 | 0.40 |
| Diethyl decanedioate | 3.9 | 4.07 | -0.17 |
| Diethyl ethylmalonate | 1.96 | 1.71 | 0.25 |
| Diethyl isopropylidenemalonate | 2.66 | 1.85 | 0.81 |
| Diethyl malonate | 0.96 | 0.99 | -0.03 |
| Diethyl methylmalonate | 1.44 | 1.27 | 0.17 |
| Diethyl oxalate | 0.56 | 0.55 | 0.01 |
| Diethyl phthalate | 2.47 | 2.19 | 0.28 |
| Diethyl pimelate | 2.31 | 2.75 | -0.44 |
| Diethyl propylmalonate | 2.49 | 2.15 | 0.34 |
| Diethyl suberate | 2.84 | 3.19 | -0.35 |
| Diethyl succinate | 1.19 | 1.43 | -0.24 |
| Diethyl sulphide | 1.95 | 2 | -0.05 |
| Diethylacetaldehyde | 1.67 | 1.87 | -0.20 |
| Diethylacetamide | 0.34 | 0.96 | -0.62 |
| Diethylamine | 0.58 | 0.81 | -0.23 |
| Diethylcarbonate | 1.21 | 0.81 | 0.40 |
| Diethylene glycol dimethyl ether | -0.36 | -0.01 | -0.35 |
| Diethyleneglycol | -1.98 | -1.27 | -0.71 |
| Diethyleneglycol diethyl ether | 0.39 | 0.85 | -0.46 |
| Diethylketone | 0.99 | 1.29 | -0.30 |
| Diethylmethylamine | 0.95 | 1.22 | -0.27 |
| Diethylstilbestrol | 5.07 | 5.25 | -0.18 |
| Diflubenzuron | 3.88 | 3.46 | 0.42 |
| Diflunisal | 4.32 | 3.24 | 1.08 |
| Digitoxin | 2.83 | 3.13 | -0.30 |
| Digoxin | 1.26 | 1.58 | -0.32 |
| Dihexyl phthalate | 5.8 | 5.71 | 0.09 |
| Dihydro-2(3H)-thiophenone | 0.6 | 0.85 | -0.25 |
| Dihydrocarvone | 2.85 | 2.7 | 0.15 |
| Diisoamyl ether | 4.25 | 3.45 | 0.80 |
| Diisobutyl phthalate | 4.11 | 3.63 | 0.48 |
| Diisobutylamine | 2.94 | 2.25 | 0.69 |
| Di-isooctyl phthalate | 8 | 7.15 | 0.85 |
| Diisopropyl ether | 2 | 2.07 | -0.07 |
| Diisopropyl phthalate | 2.83 | 3.13 | -0.30 |
| Diisopropylamine | 1.4 | 1.67 | -0.27 |
| Diltiazem | 2.7 | 2.98 | -0.28 |
| Dimethoxymethane | 0 | 0.16 | -0.16 |
| Dimethyl brassylate | 4.43 | 4.53 | -0.10 |
| Dimethyl carbonate | 0.23 | -0.05 | 0.28 |
| Dimethyl glutarate | 0.62 | 1.01 | -0.39 |
| Dimethyl malonate | -0.05 | 0.13 | -0.18 |
| Dimethyl phthalate | 1.56 | 1.33 | 0.23 |
| Dimethyl sebacate | 2.84 | 3.21 | -0.37 |
| Dimethyl suberate | 1.79 | 2.33 | -0.54 |
| Dimethyl succinate | 0.35 | 0.57 | -0.22 |
| Dimethyl sulfide | 1.77 | 1.44 | 0.33 |
| Dimethyl-(2,2-dichlorovinyl) phosphate | 1.42 | 1.15 | 0.27 |
| Dimethylacetamide | -0.7 | -0.14 | -0.56 |
| Dimethylamine | -0.38 | -0.29 | -0.09 |
| Dimethylcyanamide | -0.15 | 0.32 | -0.47 |
| Dimethylether | 0.1 | 0.27 | -0.17 |
| Dimpylate | 3.81 | 3.21 | 0.60 |
| Di-n-butylsulfone | 1.76 | 1.87 | -0.11 |
| Dinitramine | 4.3 | 3.8 | 0.50 |
| Dinoseb | 3.56 | 3.58 | -0.02 |
| Di-n-propyl phthalate | 3.27 | 3.07 | 0.20 |
| Diphenyl 2-ethylhexyl phosphate | 5.73 | 5.71 | 0.02 |
| Diphenyl ether | 4.21 | 3.86 | 0.35 |
| Diphenyl sulfide | 4.45 | 4.37 | 0.08 |
| Diphenylacetic acid | 3.05 | 3.47 | -0.42 |
| Diphenylamine | 3.5 | 3.54 | -0.04 |
| Diphenylmethane | 4.14 | 4.57 | -0.43 |
| Diphenylmethanol | 2.67 | 3.01 | -0.34 |
| Diphenylmethylamine | 3.16 | 2.88 | 0.28 |
| Diphenylnitrone | 1.88 | 2.04 | -0.16 |
| Diphenylsulfone | 2.4 | 2.89 | -0.49 |
| Diphenylsulfoxide | 2.06 | 2.26 | -0.20 |
| Dipropyl ether | 1.93 | 2.01 | -0.08 |
| Dipropyl sulfide | 2.96 | 2.88 | 0.08 |
| Dipropylamine | 1.67 | 1.69 | -0.02 |
| Dipropylsulfoxide | 0.74 | 0.36 | 0.38 |
| Disugran | 2.21 | 2.44 | -0.23 |
| Disulfoton | 4.02 | 4.02 | 0.00 |
| D-Lyxose | -3.02 | -2.93 | -0.09 |
| DMSO | -1.35 | -1.08 | -0.27 |
| Dodecamethylcyclohexasiloxane | 8.87 | 9.49 | -0.62 |
| Dodecane | 6.8 | 6.75 | 0.05 |
| Dodecanedioic acid | 3.07 | 3.28 | -0.21 |
| Dolasteron | 2.42 | 2.7 | -0.28 |
| Dopa | -1.8 | -1.98 | 0.18 |
| Dosulepin | 4.49 | 5.01 | -0.52 |
| D-Ribose | -2.32 | -2.79 | 0.47 |
| Dronabinol | 6.97 | 6.74 | 0.23 |
| Eicosane | 10.39 | 10.99 | -0.60 |
| Elaidic acid | 6.86 | 6.79 | 0.07 |
| Emodepside | 4.9 | 4.99 | -0.09 |
| Enalapril | 0.16 | 0.7 | -0.54 |
| Enanthic acid | 2.41 | 2.35 | 0.06 |
| Enantholactam | 0.24 | 0.89 | -0.65 |
| Endrin | 5.2 | 5.33 | -0.13 |
| Enprofylline | 0.33 | 0.92 | -0.59 |
| Ephedrine | 1.13 | 1.13 | 0.00 |
| Epichlorohydrin | 0.45 | 0.7 | -0.25 |
| Epiquinine | 3.44 | 2.82 | 0.62 |
| Epivir | -0.93 | -0.18 | -0.75 |
| epsilon-Aminocaproic acid | -1.95 | -1.56 | -0.39 |
| epsilon-Caprolactam | -0.19 | 0.59 | -0.78 |
| epsilon-Caprothiolactam | 0.75 | 0.92 | -0.17 |
| Eradicane | 3.21 | 3.23 | -0.02 |
| Ergonovine | 1.67 | 1.57 | 0.10 |
| Esketamine | 2.18 | 2.72 | -0.54 |
| Estriol | 2.45 | 3.19 | -0.74 |
| Ethalfluralin | 4.92 | 4.32 | 0.60 |
| Ethane | 1.81 | 1.45 | 0.36 |
| Ethanol | -0.32 | -0.06 | -0.26 |
| Ethene | 1.13 | 1.27 | -0.14 |
| Ethinyl Estradiol | 3.42 | 4.1 | -0.68 |
| Ethiofencarb | 2.04 | 2.52 | -0.48 |
| Ethoxybenzene | 2.51 | 2.59 | -0.08 |
| Ethyl 2,3-dibromobutanoate | 2.5 | 2.53 | -0.03 |
| Ethyl 2,3-dibromopropionate | 1.98 | 1.86 | 0.12 |
| Ethyl 2-bromo-2-methylpropanoate | 1.8 | 1.77 | 0.03 |
| Ethyl 2-bromo-3-methylbutyrate | 2.42 | 2.44 | -0.02 |
| Ethyl 2-bromobutyrate | 2.02 | 2.16 | -0.14 |
| Ethyl 2-bromohexanoate | 3.08 | 3.04 | 0.04 |
| Ethyl 2-bromooctanoate | 4.14 | 3.92 | 0.22 |
| Ethyl 2-bromopropionate | 1.49 | 1.72 | -0.23 |
| Ethyl 2-bromovalerate | 2.55 | 2.6 | -0.05 |
| Ethyl 2-chloropropionate | 1.35 | 1.6 | -0.25 |
| Ethyl 2-furancarboxylate | 1.52 | 1.57 | -0.05 |
| Ethyl 2-methylbutanoate | 1.59 | 2.07 | -0.48 |
| Ethyl 2-picolinate | 0.87 | 0.9 | -0.03 |
| Ethyl 3-bromopropionate | 1.44 | 1.49 | -0.05 |
| Ethyl 3-chloropropionate | 1.3 | 1.41 | -0.11 |
| Ethyl 4-aminobenzoate | 1.89 | 1.3 | 0.59 |
| Ethyl 4-bromobutyrate | 1.62 | 1.93 | -0.31 |
| Ethyl 4-chlorobutyrate | 1.48 | 1.85 | -0.37 |
| Ethyl 4-hydroxybenzoate | 2.43 | 1.81 | 0.62 |
| Ethyl 4-pyridinecarboxylate | 1.43 | 0.86 | 0.57 |
| Ethyl 5-bromovalerate | 2.15 | 2.37 | -0.22 |
| Ethyl 6-bromohexanoate | 2.68 | 2.81 | -0.13 |
| Ethyl acetate | 0.73 | 0.91 | -0.18 |
| Ethyl acetoacetate | 0.24 | 0.49 | -0.25 |
| Ethyl acrylate | 1.32 | 1.13 | 0.19 |
| Ethyl amyl ether | 2.46 | 2.45 | 0.01 |
| Ethyl benzoate | 2.64 | 2.21 | 0.43 |
| Ethyl benzoylacetate | 1.87 | 1.79 | 0.08 |
| Ethyl bromoacetate | 1.12 | 1.05 | 0.07 |
| Ethyl butanoate | 1.73 | 1.79 | -0.06 |
| Ethyl chloroformate | 0.63 | 0.64 | -0.01 |
| Ethyl cyanoacetate | 0.02 | 0.38 | -0.36 |
| Ethyl dodecanoate | 5.71 | 5.31 | 0.40 |
| Ethyl ether | 0.89 | 1.13 | -0.24 |
| Ethyl formate | 0.26 | 0.37 | -0.11 |
| Ethyl hexanoate | 2.83 | 2.67 | 0.16 |
| Ethyl iodide | 2 | 2.08 | -0.08 |
| Ethyl isobutanoate | 1.55 | 1.63 | -0.08 |
| Ethyl isothiocyanate | 1.47 | 2.23 | -0.76 |
| Ethyl isovalerate | 2.17 | 2.07 | 0.10 |
| Ethyl lactate | -0.18 | 0.05 | -0.23 |
| Ethyl methyl ketone oxime | 0.65 | 0.58 | 0.07 |
| Ethyl nicotinate | 1.32 | 0.86 | 0.46 |
| Ethyl N-phenylcarbamate | 2.3 | 2.14 | 0.16 |
| Ethyl pentanoate | 2.3 | 2.23 | 0.07 |
| Ethyl phenylacetate | 2.42 | 2.65 | -0.23 |
| Ethyl propanoate | 1.21 | 1.35 | -0.14 |
| Ethyl salicylate | 2.95 | 2.32 | 0.63 |
| Ethyl thiocyanate | 1.22 | 1.06 | 0.16 |
| Ethyl trans-cinnamate | 2.99 | 2.69 | 0.30 |
| Ethyl trichloroacetate | 2.39 | 2.24 | 0.15 |
| Ethyl vanillin | 1.58 | 1.53 | 0.05 |
| Ethyl vinyl ether | 1.04 | 1.34 | -0.30 |
| Ethylamine | -0.13 | -0.15 | 0.02 |
| Ethylbenzene | 3.15 | 3.17 | -0.02 |
| Ethylcarbamate | -0.15 | -0.08 | -0.07 |
| Ethylcarbamide | -0.74 | -0.49 | -0.25 |
| Ethyldiisopropylamin | 2.68 | 2.63 | 0.05 |
| Ethyldimethylamine | 0.7 | 0.67 | 0.03 |
| Ethylenedichloride | 1.48 | 1.39 | 0.09 |
| Ethylenethiourea | -0.66 | -0.6 | -0.06 |
| Ethylmethylamine | 0.15 | 0.26 | -0.11 |
| Ethylnitrate | 1 | 1.35 | -0.35 |
| Ethynylbenzene | 2.53 | 2.39 | 0.14 |
| Ethyrimol | 2.22 | 2.4 | -0.18 |
| Etofylline | -0.49 | -1.07 | 0.58 |
| Etoposide | 1.97 | 1.29 | 0.68 |
| Exalgin | 1.07 | 1.37 | -0.30 |
| Exaltol | 4.82 | 3.93 | 0.89 |
| Famotidine | -0.81 | -0.86 | 0.05 |
| Fenarimol | 3.6 | 3.2 | 0.40 |
| Fenbufen | 3.2 | 3.11 | 0.09 |
| Fenchlorphos | 5.07 | 4.71 | 0.36 |
| Fenchone | 3.52 | 2.69 | 0.83 |
| Fenoprop | 3.8 | 3.53 | 0.27 |
| Fenoxycarb | 4.3 | 3.68 | 0.62 |
| Fenpropathrin | 6 | 5.26 | 0.74 |
| Fenpropimorph | 4.93 | 5.07 | -0.14 |
| Fensulfothion | 2.23 | 2.34 | -0.11 |
| Fenthion | 4.09 | 3.93 | 0.16 |
| Fenthoate | 3.69 | 3.76 | -0.07 |
| Fenvalerate | 6.2 | 6.61 | -0.41 |
| Fimepinostat | -1.49 | -0.93 | -0.56 |
| Finasteride | 3.03 | 3.89 | -0.86 |
| Fipronil | 3.47 | 3.52 | -0.05 |
| Fleroxacin | -0.55 | -0.16 | -0.39 |
| Floxuridine | -1.38 | -1.78 | 0.40 |
| Fluchloralin | 4.63 | 4.19 | 0.44 |
| Flucloxacillin | 2.61 | 2.94 | -0.33 |
| Fluconazole | 0.5 | 0.73 | -0.23 |
| Fludrocortisone | 1.67 | 1.75 | -0.08 |
| Flufenamic acid | 5.25 | 4.2 | 1.05 |
| Flumazenil | 1.64 | 1.36 | 0.28 |
| Flumequine | 1.72 | 2.22 | -0.50 |
| Flunarizine | 5.78 | 5.74 | 0.04 |
| Flunitrazepam | 2.06 | 2.08 | -0.02 |
| Fluometuron | 2.42 | 2.45 | -0.03 |
| Fluoranthene | 5.16 | 5.33 | -0.17 |
| Fluorene | 4.18 | 4.71 | -0.53 |
| Fluoroacetamide | -1.05 | -1.3 | 0.25 |
| Fluorobenzene | 2.27 | 2.25 | 0.02 |
| Flupentixol | 4.51 | 5.06 | -0.55 |
| Flurbiprofen | 3.99 | 3.83 | 0.16 |
| Fluridone | 2.98 | 3.96 | -0.98 |
| Flutamide | 3.35 | 3 | 0.35 |
| Fluvastatin | 4.17 | 5.13 | -0.96 |
| Fomesafen | 3 | 3.2 | -0.20 |
| Formaldehyde diethylacetal | 0.84 | 1.02 | -0.18 |
| Formamide | -1.51 | -0.95 | -0.56 |
| Formamidoxime | -1.64 | -1.26 | -0.38 |
| Formanilide | 1.15 | 1.27 | -0.12 |
| Formic acid | -0.54 | -0.39 | -0.15 |
| Formylhydrazine | -2.05 | -1.24 | -0.81 |
| Ftorafur | -0.27 | 0.12 | -0.39 |
| Furan | 1.34 | 1.34 | 0.00 |
| Furfural | 0.52 | 0.93 | -0.41 |
| Fusaric acid | 0.68 | 0.41 | 0.27 |
| gamma-Decalactone | 2.72 | 3.5 | -0.78 |
| gamma-Nonanolactone | 1.83 | 3.06 | -1.23 |
| Ganciclovir | -2.07 | -2.03 | -0.04 |
| Gitoxin | 1.68 | 1.58 | 0.10 |
| Glycerol trinitrate | 1.62 | 1.98 | -0.36 |
| Glyceryltriacetate | 0.25 | 0.66 | -0.41 |
| Glycine | -3 | -3.32 | 0.32 |
| Glydiazinamide | 1.91 | 1.22 | 0.69 |
| Glyme | -0.21 | 0.13 | -0.34 |
| Griseofulvin | 2.18 | 2.43 | -0.25 |
| Guajen | 4.4 | 4.15 | 0.25 |
| Guanabenz | 3.02 | 2.59 | 0.43 |
| Guanidine | -1.25 | -1.25 | 0.00 |
| Guanine | -0.91 | -0.54 | -0.37 |
| Guanosine | -1.89 | -2.44 | 0.55 |
| Harmalol | 2.19 | 2.73 | -0.54 |
| Harmony | 1.23 | 0.39 | 0.84 |
| Hemimellitene | 3.55 | 3.43 | 0.12 |
| Heptachlor | 5.27 | 6.02 | -0.75 |
| Heptachlor epoxide | 5.4 | 5.1 | 0.30 |
| Heptadecane | 8.79 | 9.4 | -0.61 |
| Heptane | 4.66 | 4.1 | 0.56 |
| Heptanedioic acid | 0.58 | 1.08 | -0.50 |
| Heptanonitrile | 2.25 | 2.5 | -0.25 |
| Heptanoyl chloride | 3.52 | 3.48 | 0.04 |
| Heptyl bromide | 4.36 | 3.61 | 0.75 |
| Heptylbenzene | 5.37 | 5.47 | -0.10 |
| Hexabromobenzene | 6.07 | 6.13 | -0.06 |
| Hexachlorobenzene | 5.73 | 5.41 | 0.32 |
| Hexachlorobutadiene | 4.78 | 4.77 | 0.01 |
| Hexachloroethane | 4.14 | 3.93 | 0.21 |
| Hexadecanedioic acid | 5.7 | 5.04 | 0.66 |
| Hexafluoro-2-propanol | 1.66 | 1.59 | 0.07 |
| Hexafluorobenzene | 2.54 | 2.35 | 0.19 |
| Hexamethylbenzene | 4.61 | 4.51 | 0.10 |
| Hexane | 3.8 | 3.57 | 0.23 |
| Hexanenitrile | 1.66 | 2.06 | -0.40 |
| Hexanoyl chloride | 2.99 | 3.04 | -0.05 |
| Hexobarbital | 1.49 | 1.14 | 0.35 |
| Hexyl bromide | 3.8 | 3.17 | 0.63 |
| Hexyl-1,2-dinitrate | 3.51 | 3.64 | -0.13 |
| Hexylbenzene | 5.52 | 5.01 | 0.51 |
| Hexylcarbamate | 1.85 | 1.68 | 0.17 |
| Hexylisothiocyanate | 4.01 | 3.99 | 0.02 |
| Hydracrylic acid | -0.62 | -0.74 | 0.12 |
| Hydrocinnamonitrile | 1.7 | 2.48 | -0.78 |
| Hydrocinnamyl alcohol | 1.88 | 2.12 | -0.24 |
| Hydrocortisone hemipimelate | 3.26 | 3.05 | 0.21 |
| Hydroflumethiazide | 0.54 | 0.46 | 0.08 |
| Hydroxyacetic acid | -1.11 | -1.18 | 0.07 |
| Hydroxyurea | -1.27 | -1.72 | 0.45 |
| Hydroxyzine | 3.55 | 2.98 | 0.57 |
| Hyoscyamine | 1.83 | 2.3 | -0.47 |
| Hypoxanthine | -1.31 | -0.34 | -0.97 |
| Imazapyr | 0.22 | 1.05 | -0.83 |
| Imazaquin | 1.86 | 2.45 | -0.59 |
| Imidazole | -0.08 | -0.68 | 0.60 |
| Imipramine | 4.62 | 4.7 | -0.08 |
| Imiquimod | 2.7 | 2.4 | 0.30 |
| Indane | 3.18 | 3.59 | -0.41 |
| Indene | 2.92 | 3.47 | -0.55 |
| Indinavir | 2.92 | 2.83 | 0.09 |
| Indol-3-ylacetic acid | 1.41 | 1.86 | -0.45 |
| Indole | 2.14 | 2.13 | 0.01 |
| Indometacin | 3.1 | 4.03 | -0.93 |
| Iodoacetamide | -0.19 | 0.07 | -0.26 |
| Iodobenzene | 3.25 | 3.24 | 0.01 |
| Iohexol | -3.05 | -2.04 | -1.01 |
| Iopromide | -2.05 | -1.04 | -1.01 |
| Ioversol | -2.98 | -2.51 | -0.47 |
| Ioxynil | 3.43 | 3.22 | 0.21 |
| Ipronidazole | 1.06 | 1.59 | -0.53 |
| Isoamyl acetate | 2.25 | 2.07 | 0.18 |
| Isobutene | 2.34 | 1.98 | 0.36 |
| Isobutyl formate | 1.19 | 1.09 | 0.10 |
| Isobutyl isobutyrate | 2.48 | 2.35 | 0.13 |
| Isobutyl methyl ketone | 1.31 | 1.57 | -0.26 |
| Isobutyl propanoate | 2.17 | 2.07 | 0.10 |
| Isobutylbenzene | 4.54 | 3.93 | 0.61 |
| Isobutylpropylamine | 2.07 | 1.97 | 0.10 |
| Isobutyranilide | 2.02 | 2.2 | -0.18 |
| Isobutyronitrile | 0.47 | 1.02 | -0.55 |
| Isocarboxazid | 1.49 | 1.23 | 0.26 |
| Isocumene | 3.69 | 3.63 | 0.06 |
| Isodecyl diphenyl phosphate | 5.7 | 6.59 | -0.89 |
| Isohexanoic acid | 1.75 | 1.75 | 0.00 |
| Isoleucine | -1.69 | -1.76 | 0.07 |
| Isoleucinol | 0.47 | -0.33 | 0.80 |
| Isoniazid | -1.14 | -1.08 | -0.06 |
| Isopentyl alcohol | 1.16 | 1.1 | 0.06 |
| Isopentyl chloride | 2.98 | 2.49 | 0.49 |
| Isopentyl propionate | 2.76 | 2.51 | 0.25 |
| Isopentylamine | 1.32 | 1.01 | 0.31 |
| Isophthalamide | -0.21 | -1.11 | 0.90 |
| Isophthalic acid | 1.66 | 0.52 | 1.14 |
| Isoprene | 2.42 | 2.22 | 0.20 |
| Isopropanolamine | -0.96 | -1.01 | 0.05 |
| Isopropenylacetate | 1.07 | 1.52 | -0.45 |
| Isopropylacetate | 1.02 | 1.38 | -0.36 |
| Isopropylamine | 0.26 | 0.28 | -0.02 |
| Isopropylnitrate | 1.66 | 1.82 | -0.16 |
| Isoproturon | 2.87 | 2.58 | 0.29 |
| Isoquinoline | 2.08 | 1.88 | 0.20 |
| Isosorbide | -1.31 | -1.87 | 0.56 |
| Isosorbide 5-nitrate | -0.4 | -0.72 | 0.32 |
| Isotretinoin | 6.3 | 5.63 | 0.67 |
| Isovaleronitrile | 1.12 | 1.46 | -0.34 |
| Isoxazole | 0.08 | -0.8 | 0.88 |
| Isoxicam | 2.83 | 3.56 | -0.73 |
| Kappa-bifenthrin | 6.27 | 7.39 | -1.12 |
| Kentanserin | 3.01 | 2.5 | 0.51 |
| Kepone | 5.44 | 5.43 | 0.01 |
| Ketoconazole | 4.34 | 3.88 | 0.46 |
| Ketoprofen | 3.16 | 2.95 | 0.21 |
| Labetalol | 3.09 | 2.74 | 0.35 |
| Lacidipine | 5.56 | 6.06 | -0.50 |
| Lactic acid | -0.72 | -0.71 | -0.01 |
| Lactonitrile | -0.94 | -0.56 | -0.38 |
| lambda-Cyhalothrin | 7 | 6.54 | 0.46 |
| Latamoxef | -0.58 | -0.72 | 0.14 |
| Lauric acid | 4.2 | 4.55 | -0.35 |
| Lauronitrile | 4.9 | 4.7 | 0.20 |
| Lawsone | 1.38 | 0.81 | 0.57 |
| Leucine | -1.57 | -1.76 | 0.19 |
| Levalbuterol | 1.4 | 1.46 | -0.06 |
| Levobetaxolol | 2.81 | 2.98 | -0.17 |
| Levofloxacin | -0.28 | 0.72 | -1.00 |
| Levomoprolol | 1.69 | 1.63 | 0.06 |
| Levopropicillin | 2.65 | 2.39 | 0.26 |
| Levopropoxyphene | 4.4 | 5.19 | -0.79 |
| Lidoflazine | 5.6 | 6.02 | -0.42 |
| Lignocaine | 2.9 | 2.66 | 0.24 |
| Lincomycin | 0.2 | 0.23 | -0.03 |
| Lindane | 3.55 | 4.03 | -0.48 |
| Linuron | 3.2 | 3 | 0.20 |
| L-Menthone | 3.05 | 2.79 | 0.26 |
| Lomefloxacin | -0.8 | -0.98 | 0.18 |
| Lomustine | 2.83 | 2.56 | 0.27 |
| Loratadine | 5.2 | 5.4 | -0.20 |
| Lormetazepam | 2.38 | 3.13 | -0.75 |
| Lysine | -2.82 | -3.02 | 0.20 |
| Malic acid | -1.26 | -1.03 | -0.23 |
| Mandelic acid | 0.62 | 0.59 | 0.03 |
| Mandelic acid ethylester | 0.91 | 1.35 | -0.44 |
| m-Anisic acid | 2.02 | 1.38 | 0.64 |
| m-Anisidine | 0.93 | 1.25 | -0.32 |
| m-Anthranilic acid | 0.34 | 0.54 | -0.20 |
| MCPB | 3.43 | 3.22 | 0.21 |
| m-Cresol | 1.98 | 2.17 | -0.19 |
| m-Cresylacetate | 2.09 | 2.52 | -0.43 |
| m-Diacetamidobenzene | 0.5 | 0.73 | -0.23 |
| Mebendazole | 2.83 | 2.23 | 0.60 |
| Mecoprop | 3.13 | 2.81 | 0.32 |
| Medazepam | 4.05 | 3.54 | 0.51 |
| Mefoxine | -0.02 | 0.39 | -0.41 |
| Meloxicam | 3.01 | 2.81 | 0.20 |
| Memantine | 3.28 | 2.9 | 0.38 |
| Menthol | 3.4 | 2.51 | 0.89 |
| Mephenamic acid | 4.2 | 3.95 | 0.25 |
| Mephenate | 2.01 | 1.98 | 0.03 |
| Mephenesin | 1.41 | 1 | 0.41 |
| Mepindolol | 2.3 | 2.71 | -0.41 |
| Meprobamate | 0.7 | 0.53 | 0.17 |
| Mepyramine | 3.27 | 3.14 | 0.13 |
| Mercaptoacetic acid | 0.09 | 0.2 | -0.11 |
| Mercaptodimethur | 2.92 | 2.6 | 0.32 |
| Mescalin | 0.78 | 1.38 | -0.60 |
| Mesitol | 2.73 | 2.85 | -0.12 |
| Mesoridazine | 3.05 | 3.74 | -0.69 |
| Metalaxyl | 1.65 | 1.67 | -0.02 |
| Metaxon | 2.69 | 2.34 | 0.35 |
| Methadone | 3.93 | 4.8 | -0.87 |
| Methanol | -0.77 | -0.49 | -0.28 |
| Methaqualone | 2.5 | 2.77 | -0.27 |
| Methicillin | 1.3 | 1.83 | -0.53 |
| Methomyl | 0.6 | 1.01 | -0.41 |
| Methotrimeprazine | 4.68 | 4.67 | 0.01 |
| Methoxychlor | 5.08 | 5.78 | -0.70 |
| Methoxytetrachlorocyclohexane | 2.99 | 2.99 | 0.00 |
| Methyl (Z) 9-octadecenoate | 7.45 | 7.12 | 0.33 |
| Methyl 2-hydroxybenzoate | 2.46 | 1.89 | 0.57 |
| Methyl 2-methoxybenzoate | 2.04 | 1.71 | 0.33 |
| Methyl 2-methylbutyrate | 1.55 | 1.64 | -0.09 |
| Methyl 4-hydroxybenzoate | 1.96 | 1.38 | 0.58 |
| Methyl 5-bromovalerate | 1.62 | 1.94 | -0.32 |
| Methyl acetate | 0.18 | 0.48 | -0.30 |
| Methyl acrylate | 0.8 | 0.7 | 0.10 |
| Methyl benzoate | 2.12 | 1.78 | 0.34 |
| Methyl carbamate | -0.66 | -0.51 | -0.15 |
| Methyl cellosolve | -0.77 | -0.63 | -0.14 |
| Methyl chlorocarbonate | 0.14 | 0.21 | -0.07 |
| Methyl decanoate | 4.41 | 4 | 0.41 |
| Methyl formate | 0.03 | -0.06 | 0.09 |
| Methyl hexanoate | 2.3 | 2.24 | 0.06 |
| Methyl hydrocinnamate | 2.32 | 2.66 | -0.34 |
| Methyl isoamyl ketone | 1.88 | 2.01 | -0.13 |
| Methyl isonicotinate | 0.87 | 0.43 | 0.44 |
| Methyl laurate | 5.41 | 4.88 | 0.53 |
| Methyl levulinate | -0.13 | 0.5 | -0.63 |
| Methyl methacrylate | 1.38 | 1.11 | 0.27 |
| Methyl nicotinate | 0.81 | 0.43 | 0.38 |
| Methyl N-methylcarbamate | -0.06 | -0.25 | 0.19 |
| Methyl nonanoate | 3.88 | 3.56 | 0.32 |
| Methyl octanoate | 3.36 | 3.12 | 0.24 |
| Methyl phenylacetate | 1.83 | 2.22 | -0.39 |
| Methyl propanoate | 0.84 | 0.92 | -0.08 |
| Methyl trans-3-pentenoate | 1.28 | 1.4 | -0.12 |
| Methyl trans-cinnamate | 2.62 | 2.26 | 0.36 |
| Methyl trichloroacetate | 2.03 | 1.81 | 0.22 |
| Methyl trifluoroacetate | 0.6 | 1.07 | -0.47 |
| Methyl undecanoate | 4.79 | 4.44 | 0.35 |
| Methyl valerate | 1.96 | 1.8 | 0.16 |
| Methyl Z,Z-9,12-octadecadieneoate | 6.82 | 6.72 | 0.10 |
| Methylacetamide | -1.05 | -0.48 | -0.57 |
| Methylamine | -0.57 | -0.7 | 0.13 |
| Methylbenzene | 2.73 | 2.71 | 0.02 |
| Methylchloroacetate | 0.63 | 0.54 | 0.09 |
| Methylchloroform | 2.49 | 2.6 | -0.11 |
| Methylcyclohexane | 3.88 | 3.44 | 0.44 |
| Methylcyclopentane | 3.37 | 3.05 | 0.32 |
| Methylenanthate | 2.83 | 2.68 | 0.15 |
| Methylhippurate | 0.82 | 0.58 | 0.24 |
| Methylhydrazine | -1.05 | -1.08 | 0.03 |
| Methylnitrophos | 3.3 | 3.33 | -0.03 |
| Methyl-n-propylketone | 0.91 | 1.29 | -0.38 |
| Methyloxiran | 0.03 | 0.64 | -0.61 |
| Methylparathion | 2.86 | 2.99 | -0.13 |
| Methylpentachlorocyclohexane | 4.04 | 4.06 | -0.02 |
| Methylphenobarbital | 1.84 | 1.19 | 0.65 |
| Methylphenylsulfone | 0.47 | 1.22 | -0.75 |
| Methylphenylsulfoxide | 0.55 | 0.59 | -0.04 |
| Methylthiocyanate | 0.73 | 0.78 | -0.05 |
| Methylthiopentachlorocyclohexane | 3.75 | 4.18 | -0.43 |
| Methyltriazothion | 2.75 | 2.79 | -0.04 |
| Metolachlor | 3.13 | 2.96 | 0.17 |
| Metolcarb | 1.7 | 1.79 | -0.09 |
| Metoprolol | 2.34 | 1.91 | 0.43 |
| Metosulam | 2.5 | 2.88 | -0.38 |
| Metribuzin | 1.58 | 1.48 | 0.10 |
| Metronidazol | -0.1 | 0.09 | -0.19 |
| Mevinphos | 1.2 | 0.25 | 0.95 |
| Mexiletine | 2.15 | 2.28 | -0.13 |
| Midazolam | 3.27 | 3.73 | -0.46 |
| Molinate | 3.21 | 2.59 | 0.62 |
| Monacolin K | 4.26 | 5.36 | -1.10 |
| Monocrotophos | -0.2 | -0.71 | 0.51 |
| Monolinuron | 2.3 | 2.47 | -0.17 |
| Moracizine | 2.98 | 2.81 | 0.17 |
| Morpholine | -0.86 | -0.71 | -0.15 |
| MTBE | 1.05 | 1.38 | -0.33 |
| m-Toluamide | 1.18 | 0.9 | 0.28 |
| m-Toluidine | 1.4 | 1.66 | -0.26 |
| m-Tolyl N,N-dimethylcarbamate | 2.05 | 2.13 | -0.08 |
| Mustard oil | 1.94 | 2.45 | -0.51 |
| N-(2,6-dichlorophenylmethylene)benzenamine N-oxide | 2.61 | 3.1 | -0.49 |
| N-(2-Chloroethyl)-N'-(4-hydroxycyclohexyl)-N-nitrosourea | 1.05 | 1.26 | -0.21 |
| N-(2-Chloroethyl)-N-nitrosourea | 0.57 | 0.5 | 0.07 |
| N-(2-Methoxyphenyl)sulfanilamide | 1.56 | 1.69 | -0.13 |
| N-(2-Norbornyl)-N'-(2-chloroethyl)-N'-nitrosourea | 2.98 | 2.74 | 0.24 |
| N-(3,4-Dichlorophenyl)-N'-phenylurea | 4.7 | 4.2 | 0.50 |
| N-(3,5-Dibromo-2-pyridyl)sulfanilamide | 2.74 | 2.55 | 0.19 |
| N-(3,5-Dichloro-2-pyridyl)sulfanilamide | 1.97 | 2.31 | -0.34 |
| N-(3-Bromo-2-pyridyl)sulfanilamide | 1.24 | 1.9 | -0.66 |
| N-(4-Isopropylphenylmethylene)benzenamine N-oxide | 3.37 | 3.1 | 0.27 |
| N-(4-Methoxyphenyl)sulfanilamide | 1.51 | 1.69 | -0.18 |
| N-(4-Methoxyphenylmethylene)benzenamine N-oxide | 1.94 | 1.97 | -0.03 |
| N-(4-Methylbenzylidene)aniline N-oxide | 2.41 | 2.38 | 0.03 |
| N,N'-Diacetylurea | -0.68 | -0.47 | -0.21 |
| N,N-Diallylurea | 0.64 | 0.84 | -0.20 |
| N,N'-Dibutylurea | 1.4 | 2.08 | -0.68 |
| N,N-Diethylaniline | 3.31 | 3.02 | 0.29 |
| N,N-Diethyl-N'-methyl-N'-nitrosourea | 1.11 | 1.08 | 0.03 |
| N,N-Dimethyl-2-anisidine | 1.63 | 1.85 | -0.22 |
| N,N-Dimethyl-2-methoxybenzamide | 0.71 | 1.09 | -0.38 |
| N,N-Dimethyl-3-methoxybenzamide | 1 | 1.09 | -0.09 |
| N,N-Dimethyl-3-toluidine | 2.8 | 2.26 | 0.54 |
| N,N-Dimethyl-4-methoxybenzamide | 0.96 | 1.09 | -0.13 |
| N,N-Dimethylaniline | 2.31 | 1.92 | 0.39 |
| N,N-Dimethylbenzamide | 0.62 | 1.16 | -0.54 |
| N,N-Dimethylbenzenesulfonamide | 1.35 | 0.87 | 0.48 |
| N,N-Dimethylformamide | -0.74 | -0.35 | -0.39 |
| N,N-Dimethyl-N'-(3-chlorophenyl)urea | 2 | 2.05 | -0.05 |
| N,N-Dimethyl-N'-(4-bromophenyl)urea | 2.19 | 2.17 | 0.02 |
| N,N-Dimethyl-N'-(4-nitrophenyl)urea | 1.51 | 1.39 | 0.12 |
| N,N-Dimethyl-N'-(4-tolyl)urea | 1.98 | 1.86 | 0.12 |
| N,N-Dimethyl-N',N'-diphenylurea | 2.8 | 2.88 | -0.08 |
| N,N'-Dimethyl-N-phenylurea | 1.02 | 1.07 | -0.05 |
| N,N-Dimethylphenoxyacetamide | 0.77 | 1.18 | -0.41 |
| N,N-Dimethylpropionamide | -0.11 | 0.3 | -0.41 |
| N,N-Dimethyl-p-toluidine | 2.61 | 2.26 | 0.35 |
| N,N'-Dinitrosopiperazine | -0.85 | -0.93 | 0.08 |
| N-Acetylanthranilic acid | 1.88 | 1.21 | 0.67 |
| Nadolol | 0.71 | 1.5 | -0.79 |
| Nalidixic acid | 1.59 | 1.38 | 0.21 |
| Naloxone | 2.09 | 2.12 | -0.03 |
| Naphthalene | 3.35 | 3.43 | -0.08 |
| n-Butyl acetate | 1.7 | 1.79 | -0.09 |
| n-Butyl acrylate | 2.36 | 2.01 | 0.35 |
| n-Butylcarbamate | 0.85 | 0.8 | 0.05 |
| n-Butylformate | 1.32 | 1.25 | 0.07 |
| n-Butylurea | 0.41 | 0.39 | 0.02 |
| N-Cyano-2-(3,3-dimethyl-1-triazenyl)-benzamide | 0.8 | -0.07 | 0.87 |
| n-Decanoic acid | 4.09 | 3.67 | 0.42 |
| n-Decylacetate | 4.94 | 4.43 | 0.51 |
| n-Decylamine | 4.1 | 3.37 | 0.73 |
| n-Dodecanal | 5.07 | 4.67 | 0.40 |
| Nebivolol | 4.04 | 3.49 | 0.55 |
| Neburea | 3.8 | 4.01 | -0.21 |
| Necrostatin-1 | 0.63 | 1.06 | -0.43 |
| Nedocromil | 2.22 | 1.82 | 0.40 |
| Neohexane | 3.82 | 3.33 | 0.49 |
| Neopentyl alcohol | 1.36 | 1.02 | 0.34 |
| N-Ethylaniline | 2.16 | 2.13 | 0.03 |
| N-Ethylbromoacetamide | 0.34 | 0.21 | 0.13 |
| N-Ethyl-N'-phenylurea | 1.64 | 1.73 | -0.09 |
| Neurontin | -1.25 | -0.98 | -0.27 |
| Nevirapine | 2.41 | 2.7 | -0.29 |
| n-Heptaldehyde | 1.99 | 2.47 | -0.48 |
| n-Heptylamine | 2.57 | 2.05 | 0.52 |
| n-Hexanoic acid | 1.92 | 1.91 | 0.01 |
| n-Hexylacetate | 2.83 | 2.67 | 0.16 |
| n-Hexylamine | 2.06 | 1.61 | 0.45 |
| n-Hexylformate | 2.38 | 2.13 | 0.25 |
| N-Hydroxyacetamide | -1.54 | -1.16 | -0.38 |
| N-Hydroxy-N'-butylurea | 0.32 | -0.03 | 0.35 |
| N-Hydroxy-N'-propylurea | -0.22 | -0.47 | 0.25 |
| Nicosulfuron | 0.5 | 0.83 | -0.33 |
| Niflumic acid | 4.43 | 3.69 | 0.74 |
| Nimesulide | 2.6 | 2.5 | 0.10 |
| Nimorazole | 0.07 | -0.17 | 0.24 |
| Ninhydrin | 0.65 | 0.64 | 0.01 |
| Nitrazepam | 2.12 | 2.17 | -0.05 |
| Nitrobenzene | 1.85 | 2.1 | -0.25 |
| Nitroethane | 0.18 | 0.41 | -0.23 |
| Nitroethylene | 0.01 | 0.65 | -0.64 |
| Nitrofungin | 2.33 | 2.23 | 0.10 |
| Nitromide | 0.83 | 0.3 | 0.53 |
| Nitrophenylmethane | 1.75 | 1.71 | 0.04 |
| N-Maleoyl-3-aminopropionic acid ethylester | 0.41 | -0.12 | 0.53 |
| N-Methyl-2-pyrrolidone | -0.38 | 0.33 | -0.71 |
| N-Methyl-2-quinolone | 1.45 | 1.65 | -0.20 |
| N-Methyl-3,5-dimethylphenyl carbamate | 2.23 | 2.13 | 0.10 |
| N-Methyl-4-nitroaniline | 2.04 | 1.45 | 0.59 |
| N-Methylaniline | 1.7 | 1.58 | 0.12 |
| N-Methylformamide | -0.97 | -0.69 | -0.28 |
| N-Methylformanilide | 1.09 | 1.16 | -0.07 |
| N-Methylmorpholine | -0.33 | -0.3 | -0.03 |
| N-Methyl-N-benzylaniline | 4.22 | 3.29 | 0.93 |
| N-Methyl-N-nitrosourea | -0.1 | -0.11 | 0.01 |
| N-Methyl-N-phenylthiourea | 0.85 | 0.85 | 0.00 |
| N-Methyl-o-toluidine | 2.16 | 1.92 | 0.24 |
| N-Methylpiperidine | 1.3 | 1.16 | 0.14 |
| N-Methylpropargylamine | 0.08 | -0.08 | 0.16 |
| N-Methylpropylamine | 0.84 | 0.7 | 0.14 |
| N-Methyl-p-toluidine | 2.15 | 1.92 | 0.23 |
| N-Nitroso-4-piperidone | -0.47 | -0.22 | -0.25 |
| N-Nitrosodibutylamine | 1.92 | 2.62 | -0.70 |
| N-Nitrosodiethanolamine | -1.51 | -1.54 | 0.03 |
| N-Nitrosodiethylamine | 0.48 | 0.86 | -0.38 |
| N-Nitrosodiisopropylamine | 1.63 | 1.72 | -0.09 |
| N-Nitrosodimethylamine | -0.57 | -0.24 | -0.33 |
| N-Nitrosodiphenylamine | 3.13 | 3.73 | -0.60 |
| N-Nitrosodipropylamine | 1.36 | 1.74 | -0.38 |
| N-Nitrosomorpholine | -0.44 | -0.66 | 0.22 |
| N-Nitrosopiperidine | 0.63 | 0.8 | -0.17 |
| N-Nitrosopyrrolidone | -0.19 | 0.41 | -0.60 |
| N-Nitrosothiomorpholine | 0.4 | 0.21 | 0.19 |
| N-Nitrosotriethylurea | 1.54 | 1.63 | -0.09 |
| N-Nitrosotrimethylurea | 0.36 | -0.02 | 0.38 |
| n-Nonanal | 3.48 | 3.35 | 0.13 |
| n-Nonylamine | 3.57 | 2.93 | 0.64 |
| n-Octanoic acid | 3.05 | 2.79 | 0.26 |
| n-Octylacetate | 3.88 | 3.55 | 0.33 |
| n-Octylamine | 3.04 | 2.49 | 0.55 |
| Nonane | 5.65 | 5.16 | 0.49 |
| Nonanedioic acid | 1.57 | 1.96 | -0.39 |
| Nonylbenzene | 6.41 | 6.39 | 0.02 |
| Nopinene | 4.16 | 4.02 | 0.14 |
| Norethisterone | 2.97 | 3.53 | -0.56 |
| Norfloxacin | -1.03 | -1.4 | 0.37 |
| Norflurazon | 2.3 | 1.46 | 0.84 |
| Nortriptyline | 4.04 | 5.07 | -1.03 |
| N-Phenylanthranilic acid | 4.36 | 3.27 | 1.09 |
| N-Phenylglycine | 0.62 | 1.01 | -0.39 |
| N-Phenylhydroxylamine | 0.79 | 0.9 | -0.11 |
| N-Phenylmorpholine | 1.36 | 1.5 | -0.14 |
| N-Phenylpiperidine | 2.78 | 2.96 | -0.18 |
| N-Phenylsulfamide | 0.4 | 0.61 | -0.21 |
| n-Propyl acetate | 1.24 | 1.35 | -0.11 |
| n-Propyl benzoate | 3.01 | 2.65 | 0.36 |
| N-Propylaniline | 2.45 | 2.57 | -0.12 |
| n-Propylformate | 0.83 | 0.81 | 0.02 |
| N-p-Tolylsulfanilamide | 1.56 | 2.1 | -0.54 |
| N-Salicylideneaniline | 1.55 | 1.35 | 0.20 |
| n-Undecanoic acid | 4.53 | 4.11 | 0.42 |
| n-Undecylamine | 4.63 | 3.81 | 0.82 |
| n-Valeraldehyde | 1.36 | 1.59 | -0.23 |
| O,O'-Diethyl-O''-(benzothien-3-yl)glyoxylonitrile oximino phosphate | 0.56 | 0.21 | 0.35 |
| O,O'-Diethyl-O''-3,4-dimethoxyphenylglyoxylonitrile oximino thiophosphate | -0.19 | 0.54 | -0.73 |
| O,O'-Diethyl-O''-4-chlorophenylglyoxylonitrile oximino thiophosphate | 0.47 | 1.21 | -0.74 |
| O,O'-Diethyl-O''-4-fluorophenylglyoxylonitrile oximino thiophosphate | 0.35 | 0.7 | -0.35 |
| O,O-Diethyl-O-phenylphosphate | 1.34 | 2.3 | -0.96 |
| O,O'-Diisopropyl-O''-(benzothien-3-yl)glyoxylonitrile oximino phosphate | 1.56 | 1.15 | 0.41 |
| O,O'-Diisopropyl-O''-3,4-dimethoxyphenylglyoxylonitrile oximino phosphate | -0.38 | -0.2 | -0.18 |
| O,O'-Diisopropyl-O''-3,4-dimethoxyphenylglyoxylonitrile oximino thiophosphate | 0.47 | 1.48 | -1.01 |
| O,O'-Diisopropyl-O''-4-chlorophenylglyoxylonitrile oximino phosphate | -0.2 | 0.47 | -0.67 |
| O,O'-Diisopropyl-O''-4-fluorophenylglyoxylonitrile oximino phosphate | -0.43 | -0.04 | -0.39 |
| O,O'-Diisopropyl-O''-phenylglyoxylonitrile oximino phosphate | 0.06 | -0.06 | 0.12 |
| O,O'-Diisopropyl-O''-phenylglyoxylonitrile oximino thiophosphate | 2.07 | 1.62 | 0.45 |
| O,O'-Dimethyl-O''-(benzothien-3-yl)glyoxylonitrile oximino thiophosphate | 1.94 | 1.03 | 0.91 |
| O,O'-Dimethyl-O''-4-fluorophenylglyoxylonitrile oximino phosphate | -1.08 | -1.84 | 0.76 |
| O,O'-Dimethyl-O''-phenylglyoxylonitrile oximino phosphate | -1.01 | -1.86 | 0.85 |
| o-Anisic acid | 1.59 | 1.89 | -0.30 |
| o-Anthranilic acid | 1.26 | 1.05 | 0.21 |
| o-Cresol | 1.98 | 2.17 | -0.19 |
| o-Cresylacetate | 2.11 | 2.52 | -0.41 |
| Octachlorodibenzo-p-dioxin | 8.6 | 8.23 | 0.37 |
| Octachloronaphthalene | 7.7 | 7.47 | 0.23 |
| Octachlorostyrene | 6.29 | 6.97 | -0.68 |
| Octadecane | 9.32 | 9.93 | -0.61 |
| Octamethylcyclotetrasiloxane | 6.98 | 6.57 | 0.41 |
| Octane | 5.18 | 4.63 | 0.55 |
| Octanedioic acid | 1.14 | 1.52 | -0.38 |
| Octanoyl chloride | 4.05 | 3.92 | 0.13 |
| Octyl-1,2-dinitrate | 4.63 | 4.52 | 0.11 |
| Octylbenzene | 6.3 | 5.93 | 0.37 |
| Octylcyanide | 3.12 | 3.38 | -0.26 |
| o-Cumenol | 2.88 | 2.89 | -0.01 |
| Optipranolol | 2.28 | 2.67 | -0.39 |
| Ornidazole | 0.6 | 0.62 | -0.02 |
| Ornithine | -4.41 | -3.46 | -0.95 |
| Orphenadrine | 3.77 | 3.94 | -0.17 |
| o-Toluidine | 1.43 | 1.66 | -0.23 |
| o-Tolyl N,N-dimethylcarbamate | 1.86 | 2.13 | -0.27 |
| Oxacillin | 2.38 | 2.39 | -0.01 |
| Oxamniquine | 2.24 | 1.67 | 0.57 |
| Oxasulfuron | 1.1 | 0.58 | 0.52 |
| Oxazepam | 2.17 | 2.6 | -0.43 |
| Oxirane | -0.3 | 0.17 | -0.47 |
| Oxprenolol | 2.1 | 2.28 | -0.18 |
| Oxycarboxin | 0.74 | 0.62 | 0.12 |
| Oxyphenbutazone | 2.72 | 2.79 | -0.07 |
| p-Anthranilic acid | 0.86 | 0.54 | 0.32 |
| Papaverine | 2.95 | 3.72 | -0.77 |
| Paracetamol | 0.34 | 1.08 | -0.74 |
| Paspertin | 2.62 | 1.93 | 0.69 |
| p-Benzidine | 1.34 | 2.05 | -0.71 |
| PBN | 1.22 | 1.32 | -0.10 |
| PCNB | 4.64 | 4.75 | -0.11 |
| p-Cresol | 1.97 | 2.17 | -0.20 |
| p-Cresyl diphenyl phosphate | 4.4 | 4.5 | -0.10 |
| p-Cymene | 4.1 | 3.83 | 0.27 |
| Pebulate | 3.84 | 3.67 | 0.17 |
| Pefloxacin | 0.27 | 0.89 | -0.62 |
| Pelargonic acid | 3.47 | 3.23 | 0.24 |
| Penbutolol | 4.15 | 3.68 | 0.47 |
| Penconazole | 3.4 | 4.36 | -0.96 |
| Penoxalin | 5.18 | 4.37 | 0.81 |
| Pentachloroanisole | 5.45 | 4.81 | 0.64 |
| Pentachlorobenzene | 5.17 | 4.88 | 0.29 |
| Pentachlorobenzimidazole | 4.53 | 4.57 | -0.04 |
| Pentachloroethane | 3.22 | 3.26 | -0.04 |
| Pentachlorophenol | 5.12 | 4.48 | 0.64 |
| Pentachloropyridine | 3.53 | 3.77 | -0.24 |
| Pentadecane | 7.72 | 8.34 | -0.62 |
| Pentafluorobenzene | 2.53 | 2.33 | 0.20 |
| Pentafluorothiophenol | 1.56 | 2.3 | -0.74 |
| Pentamethylbenzene | 4.56 | 4.15 | 0.41 |
| Pentane | 3.39 | 3.04 | 0.35 |
| Pentanedioic acid | -0.29 | 0.2 | -0.49 |
| Pentanenitrile | 1.12 | 1.62 | -0.50 |
| Pentanoic acid | 1.39 | 1.47 | -0.08 |
| Pentobarbital | 1.4 | 1.6 | -0.20 |
| Pentoxyfylline | 0.72 | 0.72 | 0.00 |
| Pentyl benzoate | 3.79 | 3.53 | 0.26 |
| Pentyl-1,2-dinitrate | 2.94 | 3.2 | -0.26 |
| Pentylcarbamate | 1.35 | 1.24 | 0.11 |
| Peonol | 1.98 | 1.75 | 0.23 |
| Perazine | 3.9 | 4.13 | -0.23 |
| Perchlorobiphenyl | 8.27 | 9.17 | -0.90 |
| Perchlorocyclopentadiene | 5.04 | 4.81 | 0.23 |
| Peridol | 4.3 | 3.79 | 0.51 |
| Perphenazine | 4.2 | 3.88 | 0.32 |
| Pervitin | 2.07 | 2.43 | -0.36 |
| Perylene | 5.82 | 6.13 | -0.31 |
| Pethidine | 2.45 | 2.74 | -0.29 |
| Phenacemide | 0.87 | 1.11 | -0.24 |
| Phenanthrene | 4.56 | 4.51 | 0.05 |
| Phenanthrene-9,10-dione | 2.52 | 2.29 | 0.23 |
| Phenazine | 2.84 | 3.13 | -0.29 |
| Phenethyl acetate | 2.42 | 2.65 | -0.23 |
| Phenethyl alcohol | 1.42 | 1.68 | -0.26 |
| Pheneticillin | 2.28 | 1.95 | 0.33 |
| Phenindione | 2.9 | 2.67 | 0.23 |
| Phenobarbital | 1.47 | 2.16 | -0.69 |
| Phenol | 1.5 | 1.83 | -0.33 |
| Phenolphthalol | 3.27 | 4.1 | -0.83 |
| Phenothiazine | 3.78 | 4.18 | -0.40 |
| Phenoxyacetamide | 0.76 | 0.58 | 0.18 |
| Phenoxyacetic acid | 1.34 | 1.47 | -0.13 |
| Phenoxymethylpenicillin | 2.09 | 1.48 | 0.61 |
| Phenserine | 4.19 | 4.17 | 0.02 |
| Phenyl aminosalicylate | 3.15 | 2.68 | 0.47 |
| Phenyl benzoate | 3.59 | 3.48 | 0.11 |
| Phenyl N,N-dimethylcarbamate | 1.69 | 1.79 | -0.10 |
| Phenyl N-methylcarbamate | 1.24 | 1.45 | -0.21 |
| Phenyl-2-tolylcarbinol | 3.06 | 3.35 | -0.29 |
| Phenyl-4-tolylcarbinol | 3.13 | 3.35 | -0.22 |
| Phenylacetamide | 0.45 | 1 | -0.55 |
| Phenylacetate | 1.49 | 2.18 | -0.69 |
| Phenylacetic acid | 1.41 | 1.89 | -0.48 |
| Phenylacetonitrile | 1.56 | 2.04 | -0.48 |
| Phenylalanine | -1.43 | -1.18 | -0.25 |
| Phenylbutazone | 3.16 | 3.19 | -0.03 |
| Phenylcyclopropylcarbinol | 1.95 | 2.35 | -0.40 |
| Phenylethanal | 1.78 | 2.01 | -0.23 |
| Phenylformate | 1.26 | 1.64 | -0.38 |
| Phenylglycerol | 0.7 | -0.22 | 0.92 |
| Phenylhydrazine | 1.25 | 1.03 | 0.22 |
| Phenylisocyanate | 2.59 | 2.29 | 0.30 |
| Phenylisothiocyanate | 3.28 | 3.18 | 0.10 |
| Phenylmethanol | 1.1 | 1.24 | -0.14 |
| Phenylpropylether | 3.18 | 3.03 | 0.15 |
| Phenylthioacetic acid | 1.91 | 1.86 | 0.05 |
| Phenylthiocyanate | 2.54 | 2.45 | 0.09 |
| Phenylthiourea | 0.73 | 0.96 | -0.23 |
| Phenyltrifluoromethylsulfone | 2.68 | 2.6 | 0.08 |
| Phenylurea | 0.82 | 0.92 | -0.10 |
| Phenylvinylketone | 1.88 | 1.93 | -0.05 |
| Phlorol | 2.47 | 2.61 | -0.14 |
| Phosphamide | 0.78 | 0.68 | 0.10 |
| Phthalic acid | 0.73 | 0.52 | 0.21 |
| Phthalic anhydride | 1.43 | 1.6 | -0.17 |
| Phthalophos | 2.78 | 2.75 | 0.03 |
| Phthiocol | 1.2 | 1.22 | -0.02 |
| Physostigmine | 1.58 | 2.21 | -0.63 |
| Pimozide | 6.3 | 6.75 | -0.45 |
| Pinacolone | 1.2 | 1.49 | -0.29 |
| Pindolol | 1.92 | 1.6 | 0.32 |
| Pipamperone | 2.02 | 1.87 | 0.15 |
| Piperazine | -1.17 | -1.03 | -0.14 |
| Piperidine | 0.85 | 0.75 | 0.10 |
| Piperonal | 1.05 | 1.5 | -0.45 |
| Piperonyl alcohol | 1.05 | 1.17 | -0.12 |
| Pipracil | 0.5 | -0.03 | 0.53 |
| Piracetam | -1.54 | -1.13 | -0.41 |
| Pirenzepine | 0.6 | 0.45 | 0.15 |
| Piretanide | 1.5 | 1.74 | -0.24 |
| Pirimicarb | 1.7 | 1.68 | 0.02 |
| Piroxicam | 3.06 | 3.41 | -0.35 |
| p-Isopropylphenyl diphenyl phosphate | 5.7 | 5.22 | 0.48 |
| Pivalone | 3 | 2.57 | 0.43 |
| Pivalonitrile | 1.08 | 1.38 | -0.30 |
| p-Menthadiene | 4.38 | 4.07 | 0.31 |
| Practolol | 0.79 | 0.95 | -0.16 |
| Prazepam | 3.72 | 3.91 | -0.19 |
| Prednisolone | 1.62 | 1.65 | -0.03 |
| Prednisone | 1.47 | 1.67 | -0.20 |
| Preforan | 3.65 | 4.53 | -0.88 |
| Pregnenolone | 4.22 | 4.6 | -0.38 |
| Prehnitene | 3.98 | 3.79 | 0.19 |
| Proazamine | 4.81 | 4.45 | 0.36 |
| Probarbital | 0.97 | 0.72 | 0.25 |
| Procainamide | 0.88 | 0.96 | -0.08 |
| Procaine | 1.92 | 1.8 | 0.12 |
| Procarbazine | 0.06 | 0.23 | -0.17 |
| Procodazole | 1.3 | 1.59 | -0.29 |
| Procymidone | 3 | 2.94 | 0.06 |
| Progabide | 2.97 | 3.12 | -0.15 |
| Progesterone | 3.87 | 4.74 | -0.87 |
| Promazine | 4.55 | 4.46 | 0.09 |
| Promecarb | 3.1 | 2.85 | 0.25 |
| Prometon | 2.99 | 3.29 | -0.30 |
| Prometryn | 3.51 | 3.59 | -0.08 |
| Pronamide | 3.26 | 2.92 | 0.34 |
| Propachlor | 2.18 | 2.41 | -0.23 |
| Propanal | 0.59 | 0.71 | -0.12 |
| Propandioic acid | -0.81 | -0.17 | -0.64 |
| Propane | 2.36 | 1.98 | 0.38 |
| Propanenitrile | 0.16 | 0.74 | -0.58 |
| Propanil | 3.07 | 2.98 | 0.09 |
| Propanoic acid | 0.33 | 0.59 | -0.26 |
| Propanoic anhydride | 0.4 | 1.38 | -0.98 |
| Propanolamine | -1.12 | -1.04 | -0.08 |
| Propanone | -0.24 | 0.41 | -0.65 |
| Propargyl acetate | 0.28 | 0.57 | -0.29 |
| Propargyl propionate | 0.81 | 1.01 | -0.20 |
| Propargylamine | -0.43 | -0.49 | 0.06 |
| Propazine | 2.93 | 3.04 | -0.11 |
| Propenal | -0.01 | 0.49 | -0.50 |
| Propham | 2.6 | 2.61 | -0.01 |
| Propiolic acid | -0.52 | -0.19 | -0.33 |
| Propionanilide | 1.61 | 1.92 | -0.31 |
| Propoxur | 1.52 | 2.28 | -0.76 |
| Propranolol | 2.98 | 2.7 | 0.28 |
| Propyl 4-hydroxybenzoate | 3.04 | 2.25 | 0.79 |
| Propyl butyrate | 2.3 | 2.23 | 0.07 |
| Propyl chloroformate | 1.12 | 1.08 | 0.04 |
| Propyl isothiocyanate | 2.42 | 2.67 | -0.25 |
| Propyl N-methylcarbamate | 0.95 | 0.62 | 0.33 |
| Propyl propanoate | 1.77 | 1.79 | -0.02 |
| Propyl valerate | 2.83 | 2.67 | 0.16 |
| Propyl-1,2-dinitrate | 1.83 | 2.32 | -0.49 |
| Propylene | 1.77 | 1.55 | 0.22 |
| Propylenecarbonate | -0.41 | 0.32 | -0.73 |
| Propylisopropylacetamide | 1.48 | 1.83 | -0.35 |
| Propyne | 0.94 | 0.99 | -0.05 |
| Prostaglandin F2A | 2.28 | 3.21 | -0.93 |
| Prosulfuron | 2.8 | 3.13 | -0.33 |
| Proxyphylline | -0.77 | -0.6 | -0.17 |
| Prozac | 3.82 | 4.72 | -0.90 |
| Pseudococaine | 2.09 | 2.4 | -0.31 |
| p-Terphenyl | 6.03 | 5.87 | 0.16 |
| p-Toluidine | 1.39 | 1.66 | -0.27 |
| p-Tolyl N,N-dimethylcarbamate | 2.03 | 2.13 | -0.10 |
| Pulegone | 3.08 | 2.79 | 0.29 |
| Purine | -0.37 | -0.28 | -0.09 |
| Pyrazinamide | -1.88 | -2.1 | 0.22 |
| Pyrazine | -0.22 | -0.47 | 0.25 |
| Pyrazon | 1.14 | 0.27 | 0.87 |
| Pyrene | 5.08 | 5.05 | 0.03 |
| Pyridine | 0.65 | 0.88 | -0.23 |
| Pyrimidine | -0.4 | -0.15 | -0.25 |
| Pyrrole | 0.75 | 0.58 | 0.17 |
| Pyrrolidine | 0.46 | 0.45 | 0.01 |
| Quadricyclane | 2.9 | 3.1 | -0.20 |
| Quatrimycin | -1.47 | -1.73 | 0.26 |
| Quazepam | 4.03 | 4.21 | -0.18 |
| Quercitrin | 0.8 | 0.39 | 0.41 |
| Quinazolin-2,4-dione | 0.2 | 0.88 | -0.68 |
| Quinazolin-4-one | 0.77 | 0.5 | 0.27 |
| Quinclorac | 3.6 | 3.07 | 0.53 |
| Quinine | 3.5 | 2.82 | 0.68 |
| Quinmerac | 0.78 | 0.95 | -0.17 |
| Quinoclamine | 2.12 | 1.17 | 0.95 |
| Quinoline | 2.03 | 2.28 | -0.25 |
| Quinoline-1-oxide | 0.36 | 0.89 | -0.53 |
| Quinoxaline | 1.32 | 1.33 | -0.01 |
| Ranitidine | 1.28 | 1.45 | -0.17 |
| Rebemide | 1.25 | 2.26 | -1.01 |
| Reglone | -4.6 | -4.53 | -0.07 |
| Remoxipride | 2.13 | 2.96 | -0.83 |
| Renriduron | 1.3 | 1.17 | 0.13 |
| Retinol | 5.68 | 5.42 | 0.26 |
| Ribavirin | -2.6 | -3.38 | 0.78 |
| Rivastigmine | 2.1 | 2.51 | -0.41 |
| Ronidazole | -0.38 | -0.48 | 0.10 |
| Ropivacaine | 2.9 | 3.47 | -0.57 |
| Rosamicin | 2.19 | 1.43 | 0.76 |
| Saccharin | 0.91 | 0.41 | 0.50 |
| Saccharose | -3.7 | -3.44 | -0.26 |
| Salicylanilide | 3.27 | 2.89 | 0.38 |
| Salicylic acid | 2.19 | 1.56 | 0.63 |
| Sarin | 0.3 | 0.42 | -0.12 |
| s-Butylacrylate | 1.78 | 2.04 | -0.26 |
| s-Butylbenzene | 4.44 | 3.93 | 0.51 |
| s-Butylpropylamine | 1.91 | 2.12 | -0.21 |
| Scopolamine | 1.24 | 1.4 | -0.16 |
| Secnidazole | 0.22 | 0.56 | -0.34 |
| Seconal | 2.39 | 1.82 | 0.57 |
| Semustine | 3.3 | 2.84 | 0.46 |
| Serotonin | 0.53 | 1.16 | -0.63 |
| Sethoxydim | 4.38 | 4.3 | 0.08 |
| Simazine | 2.18 | 2.18 | 0.00 |
| Simvastatin | 4.68 | 5.72 | -1.04 |
| Skatole | 2.6 | 2.54 | 0.06 |
| Soman | 1.82 | 1.5 | 0.32 |
| Sorbitol | -3.1 | -3.53 | 0.43 |
| s-Phenethyl alcohol | 1.42 | 1.71 | -0.29 |
| Stavudine | -0.81 | -0.06 | -0.75 |
| s-trans-1,3-Butadiene | 1.99 | 1.79 | 0.20 |
| Stugeron | 5.77 | 5.7 | 0.07 |
| Styrene | 2.95 | 2.95 | 0.00 |
| Styrene oxide | 1.61 | 1.94 | -0.33 |
| Succinonitrile | -0.99 | 0.21 | -1.20 |
| Sufentanil | 3.95 | 4.11 | -0.16 |
| Sulcatone | 1.82 | 2.18 | -0.36 |
| Sulfadimidine | 0.27 | 0.86 | -0.59 |
| Sulfafurazole | 1.01 | 0.67 | 0.34 |
| Sulfaguanidine | -1.22 | -1.14 | -0.08 |
| Sulfamerazine | 0.14 | 0.48 | -0.34 |
| Sulfamethoxydiazine | 0.41 | 0.03 | 0.38 |
| Sulfaperine | 0.34 | 0.44 | -0.10 |
| Sulfaphenazole | 1.52 | 1.43 | 0.09 |
| Sulfasomidine | -0.3 | -0.03 | -0.27 |
| Sulfathiazole | 0.05 | 0.56 | -0.51 |
| Sulfinpyrazone | 2.3 | 1.91 | 0.39 |
| Sulfolane | -0.77 | 0.03 | -0.80 |
| Sulfometuron-methyl | 1.4 | 0.92 | 0.48 |
| Sulforidazine | 4.45 | 4.37 | 0.08 |
| Sulindac | 3.6 | 3.56 | 0.04 |
| Sulphadiazine | -0.08 | 0.1 | -0.18 |
| Tacrine | 3.32 | 2.89 | 0.43 |
| Tamoxifen | 7.1 | 6.67 | 0.43 |
| Tavron | 4.56 | 4.97 | -0.41 |
| t-Butyl propionate | 1.95 | 2.03 | -0.08 |
| t-Butylamine | 0.4 | 0.68 | -0.28 |
| t-Butylbenzene | 4.11 | 3.85 | 0.26 |
| t-Butylformate | 0.97 | 1.05 | -0.08 |
| t-Butylmercaptan | 2.14 | 2.09 | 0.05 |
| Temafloxacin | -0.2 | -0.04 | -0.16 |
| Temazepam | 2.19 | 2.49 | -0.30 |
| Terbacil | 1.89 | 2.28 | -0.39 |
| Terbufos | 4.48 | 4.59 | -0.11 |
| Terbutryne | 3.74 | 3.56 | 0.18 |
| Terfenadine | 7.1 | 6.94 | 0.16 |
| Testosterone | 3.32 | 4.02 | -0.70 |
| Tetrabromo-2-trifluoromethylbenzimidazole | 4.81 | 5.02 | -0.21 |
| Tetracene | 5.9 | 5.59 | 0.31 |
| Tetrachloro-2-trifluoromethylbenzimidazole | 3.97 | 4.54 | -0.57 |
| Tetrachlorocatechol | 4.29 | 3.55 | 0.74 |
| Tetrachloroethylene | 3.4 | 3.15 | 0.25 |
| Tetrachloroveratrole | 4.86 | 4.21 | 0.65 |
| Tetracosane | 12.53 | 13.11 | -0.58 |
| Tetradecane | 8 | 7.81 | 0.19 |
| Tetrahydrofuran | 0.46 | 0.77 | -0.31 |
| Tetrahydropyran | 0.95 | 1.07 | -0.12 |
| Tetramethylene glycol | 0.27 | -0.25 | 0.52 |
| Tetramethylguanidine | 0.41 | -0.05 | 0.46 |
| Tetramethylurea | 0.19 | -0.1 | 0.29 |
| Tetraphenylmethane | 7.88 | 8.05 | -0.17 |
| Tetrazepam | 2.76 | 3.11 | -0.35 |
| Tetroxoprim | 0.56 | 1.32 | -0.76 |
| Theophylline | -0.18 | -0.18 | 0.00 |
| Thiamazole | -0.34 | -0.35 | 0.01 |
| Thiameturon | 0.02 | 0.57 | -0.55 |
| Thiamphenicol | -0.27 | -0.48 | 0.21 |
| Thianaphthene | 3.12 | 3.37 | -0.25 |
| Thianthrene | 4.57 | 5.01 | -0.44 |
| Thiazole | 0.44 | 0.42 | 0.02 |
| Thiazone | 1.4 | 1.42 | -0.02 |
| Thimet | 3.56 | 3.82 | -0.26 |
| Thioacetamide | -0.26 | -0.41 | 0.15 |
| Thioacetanilide | 1.71 | 1.81 | -0.10 |
| Thioacetic acid | 0.14 | 0.15 | -0.01 |
| Thioanisole | 2.74 | 2.7 | 0.04 |
| Thiobencarb | 3.4 | 4.18 | -0.78 |
| Thiolane | 1.61 | 1.64 | -0.03 |
| Thiolane 1-oxide | -0.96 | -0.6 | -0.36 |
| Thiophanate-ethyl | 1.4 | 1.33 | 0.07 |
| Thiophene | 1.81 | 2.23 | -0.42 |
| Thiophos | 3.83 | 3.85 | -0.02 |
| Thioridazine | 5.9 | 5.85 | 0.05 |
| Thiourea | -1.02 | -1.26 | 0.24 |
| Thioxamyl | -0.47 | -0.4 | -0.07 |
| Thioxanthone | 3.99 | 3.65 | 0.34 |
| Threonine | -3.5 | -3.78 | 0.28 |
| Thyreoliberin | -2.47 | -3 | 0.53 |
| Tiabendazole | 1.94 | 2.09 | -0.15 |
| Tiapride | 0.9 | 1.3 | -0.40 |
| Tinidazole | 0.23 | 0.26 | -0.03 |
| t-Nitrobutane | 1.17 | 1.38 | -0.21 |
| TNT | 1.73 | 2.18 | -0.45 |
| Tolane | 4.78 | 4.55 | 0.23 |
| Tolazoline | 2.65 | 1.89 | 0.76 |
| Tolbutamide | 2.34 | 2.08 | 0.26 |
| Tolclofos-methyl | 4.56 | 4.52 | 0.04 |
| Toliprolol | 1.93 | 2.04 | -0.11 |
| Tolmetin | 2.79 | 2.79 | 0.00 |
| t-Pentylcarbamate | 0.94 | 1.04 | -0.10 |
| t-Pentylisothiocyanate | 3.13 | 3.5 | -0.37 |
| Tralkoxydim | 4.46 | 4.62 | -0.16 |
| Tramadol | 2.63 | 2.35 | 0.28 |
| Tranexamic acid | -1.87 | -1.5 | -0.37 |
| trans-1,2-Cycloheptyl dinitrate | 3.41 | 3.05 | 0.36 |
| trans-1,2-Cyclohexyl dinitrate | 2.62 | 2.75 | -0.13 |
| trans-1,2-Dichloroethylene | 2.09 | 1.75 | 0.34 |
| trans-1,3-Cyclohexyl dinitrate | 2.89 | 2.75 | 0.14 |
| trans-1,3-Dichloropropene | 1.41 | 1.81 | -0.40 |
| trans-1-Propenylbenzene | 3.35 | 3.23 | 0.12 |
| trans-2,5-Dimethyltetrahydrofuran | 1.34 | 1.71 | -0.37 |
| trans-2-Butene | 2.31 | 1.83 | 0.48 |
| trans-2-Hepten-1-ol | 1.93 | 1.74 | 0.19 |
| trans-2-Hexen-1-ol | 1.4 | 1.3 | 0.10 |
| trans-2-Methylcyclohexanol | 1.84 | 1.51 | 0.33 |
| trans-2-Nonenoic acid | 3.53 | 2.83 | 0.70 |
| trans-2-Octenoic acid | 3 | 2.39 | 0.61 |
| trans-2-Pentenoic acid | 1.41 | 1.07 | 0.34 |
| trans-2-Phenylcyclopropylamine | 1.49 | 1.78 | -0.29 |
| trans-3-Hexenoic acid | 1.4 | 1.51 | -0.11 |
| trans-3-Pentenenitrile | 0.71 | 1.22 | -0.51 |
| trans-3-Phenyl-2-propen-1-ol | 1.95 | 1.72 | 0.23 |
| trans-3-Phenyl-2-propenenitrile | 1.96 | 2.08 | -0.12 |
| trans-4-Methylcyclohexanol | 1.79 | 1.51 | 0.28 |
| trans-Cinnamic acid | 2.08 | 1.93 | 0.15 |
| trans-Stilbene | 4.81 | 4.63 | 0.18 |
| Trazodone | 2.9 | 3.28 | -0.38 |
| Triallate | 4.29 | 4.96 | -0.67 |
| Triasulfuron | 1.6 | 2.25 | -0.65 |
| Triazamate | 1.62 | 2.07 | -0.45 |
| Triazolam | 5.5 | 5.5 | 0.00 |
| Tribenuron-methyl | 1.5 | 0.76 | 0.74 |
| Tributyl phosphate | 4.01 | 4.01 | 0.00 |
| Trichlormethiazide | 0.56 | 0.14 | 0.42 |
| Trichloroacetamide | 1.04 | 0.59 | 0.45 |
| Trichloroacetic acid | 1.33 | 1.48 | -0.15 |
| Trichloroacetonitrile | 2.09 | 1.63 | 0.46 |
| Trichloroethylene | 2.53 | 2.45 | 0.08 |
| Trichloromethylthiobenzene | 3.78 | 3.8 | -0.02 |
| Trichlorosyringol | 3.74 | 3.28 | 0.46 |
| Triclosan | 4.76 | 5.05 | -0.29 |
| Tridecane | 7.33 | 7.28 | 0.05 |
| Triethanolamine | -1 | -1.7 | 0.70 |
| Triethyl phosphate | 0.8 | 1.37 | -0.57 |
| Triethylamine | 1.45 | 1.77 | -0.32 |
| Triflumethazine | 4.36 | 4.28 | 0.08 |
| Triflumizole | 1.4 | 2.23 | -0.83 |
| Trifluoperazine | 5.03 | 5.06 | -0.03 |
| Trifluoroacetamide | 0.12 | -0.15 | 0.27 |
| Trifluoroacetanilide | 2.21 | 2.07 | 0.14 |
| Trifluoroacetic acid | 0.5 | 0.74 | -0.24 |
| Trifluoroacetophenone | 2.15 | 2.3 | -0.15 |
| Trifluoromethylthiobenzene | 3.57 | 4.08 | -0.51 |
| Trifluralin | 5.34 | 4.57 | 0.77 |
| Triflusulfuron-methyl | 3.4 | 3.27 | 0.13 |
| Triforine | 2.2 | 1.99 | 0.21 |
| Trihexyphenidyl | 4.49 | 4.34 | 0.15 |
| Trimellitic anhydride | 0.99 | 0.82 | 0.17 |
| Trimeprazine | 4.71 | 4.74 | -0.03 |
| Trimethadione | -0.37 | -0.03 | -0.34 |
| Trimethoprim | 0.91 | 1.46 | -0.55 |
| Trimethyl phosphate | -0.52 | 0.08 | -0.60 |
| Trimethylacetic acid | 1.47 | 1.23 | 0.24 |
| Trimethylamine | 0.16 | 0.12 | 0.04 |
| Trimethyleneglycol dinitrate | 1.68 | 1.87 | -0.19 |
| Trimetrexate | 2.55 | 2.32 | 0.23 |
| Triphenyl phosphate | 3.9 | 4.16 | -0.26 |
| Triphenylamine | 5.74 | 4.9 | 0.84 |
| Triprolidine | 3.92 | 3.93 | -0.01 |
| Tripropyl phosphate | 1.87 | 2.69 | -0.82 |
| Tripropylamine | 2.79 | 3.09 | -0.30 |
| Triptanol | 4.93 | 5.48 | -0.55 |
| Tris(2-chloroethyl) phosphate | 1.48 | 1.55 | -0.07 |
| Tris-BP | 4.39 | 4.22 | 0.17 |
| Tropolone | 0.53 | 0.99 | -0.46 |
| Trovafloxacin | 0.15 | -0.59 | 0.74 |
| Tryptophane | -1.04 | -1.21 | 0.17 |
| Tyrosine | -1.8 | -1.58 | -0.22 |
| Undecane | 6.31 | 6.22 | 0.09 |
| Undecanedioic acid | 2.85 | 2.84 | 0.01 |
| Undecanonitrile | 4.37 | 4.26 | 0.11 |
| Uracil | -1.07 | -0.67 | -0.40 |
| Urea | -1.66 | -1.3 | -0.36 |
| Uridine | -1.71 | -2.57 | 0.86 |
| Valeryl chloride | 2.46 | 2.6 | -0.14 |
| Valine | -2.1 | -2.2 | 0.10 |
| Valium | 2.99 | 2.72 | 0.27 |
| Veratrole | 2.18 | 2.09 | 0.09 |
| Vernolate | 3.84 | 3.67 | 0.17 |
| Viagra | 1.9 | 1.71 | 0.19 |
| Vinclozolin | 3.1 | 2.72 | 0.38 |
| Vinyl acetate | 0.73 | 0.93 | -0.20 |
| Vinyl butyrate | 1.81 | 1.81 | 0.00 |
| Vinylidenechloride | 2.13 | 2.19 | -0.06 |
| Vinylpropionate | 1.29 | 1.37 | -0.08 |
| Vitamin B3 | -0.37 | -0.79 | 0.42 |
| Vitamin B6 | -0.5 | -0.35 | -0.15 |
| Vitamin C | -1.85 | -1.67 | -0.18 |
| Vitavax | 2.14 | 1.96 | 0.18 |
| Voltaren | 4.51 | 4.26 | 0.25 |
| Xylose | -3.02 | -2.93 | -0.09 |
| Zalcitabine | -1.3 | -0.86 | -0.44 |
| Zofenopril | 3.5 | 3.25 | 0.25 |
| Zoocoumarin | 3.54 | 4.15 | -0.61 |
