# Supplementary material for: Calculation of the Three Partition Coefficients logPow, logKoa and logKaw of Organic Molecules at Standard Conditions at Once by Means of a Generally Applicable Group-Additivity Method
Source: Preprints.org preprint supplement (doi:10.20944/preprints202312.0275.v1), 2023-12-05
Supplement: Supplementary file 2 [file S05. Compounds with Experimental vs. Calculated logKoa Values.doc]

| **Molecule name** | **logKoa exp** | **logKoa calc** | **Diff** |
| --- | --- | --- | --- |
| (3-(2,3-Epoxypropoxy)propyl)trimethoxysilane | 5.8 | 6.4 | -0.60 |
| (Bromomethyl)benzene | 4.65 | 4.85 | -0.20 |
| (Chloromethyl)benzene | 3.74 | 4.51 | -0.77 |
| (E) 2-Ethylhexyl 4-methoxycinnamate | 9.7 | 8.88 | 0.82 |
| (Trichloromethyl)benzene | 4.15 | 5.42 | -1.27 |
| (Z)-2-Ethylhexyl 4-methoxycinnamate | 9.08 | 8.88 | 0.20 |
| 1-(3-Methylphenyl)ethanone | 5.6 | 5.22 | 0.38 |
| 1,1,1,2-Tetrachloroethane | 3.89 | 3.79 | 0.10 |
| 1,1,1-Trifluoro-2-(2,2,2-trifluoroethoxy)ethane | 1.88 | 2.39 | -0.51 |
| 1,1,1-Trifluoro-2-propanol | 3.62 | 3.53 | 0.09 |
| 1,1,1-Trifluoroacetone | 3.51 | 2.41 | 1.10 |
| 1,1,2,2-Tetrachloroethane | 4.26 | 3.82 | 0.44 |
| 1,1,2-Trichloroethane | 3.54 | 3.35 | 0.19 |
| 1,10-Decyl dinitrate | 8.75 | 8.14 | 0.61 |
| 1,16-Hexadecanolide | 7.31 | 7.49 | -0.18 |
| 1,1-Dichloro-2-fluoroethane | 1.87 | 1.87 | 0.00 |
| 1,1-Dichloroethane | 2.41 | 2.57 | -0.16 |
| 1,1-Dichloropropane | 2.81 | 3 | -0.19 |
| 1,1-Dichloropropene | 2.51 | 2.87 | -0.36 |
| 1,1-Diethoxyethane | 3.14 | 3.86 | -0.72 |
| 1,1-Difluoroethane | 0.85 | 1.21 | -0.36 |
| 1,1'-Dimethyl-3,3',4,4'-tetrabromo-5,5'-dichloro-2,2'-bipyrrole | 13.04 | 12.6 | 0.44 |
| 1,1'-Dimethyl-3,3',4-tribromo-4',5,5'-trichloro-2,2'-bipyrrole | 11.6 | 12.21 | -0.61 |
| 1,1'-Dimethyl-3,4,4'-tribromo-3',5,5'-trichloro-2,2'-bipyrrole | 12.41 | 12.21 | 0.20 |
| 1,1-Dimethyl-3-phenylurea | 7.85 | 8.54 | -0.69 |
| 1,2,3,4,5,6,7-Heptachloronaphthalene | 10.63 | 9.92 | 0.71 |
| 1,2,3,4,5,6,8-Heptachloronaphthalene | 10.68 | 9.92 | 0.76 |
| 1,2,3,4,5,6-Hexachloronaphthalene | 10.11 | 9.32 | 0.79 |
| 1,2,3,4,5,7-Hexachloronaphthalene | 9.8 | 9.32 | 0.48 |
| 1,2,3,4,5,8-Hexachloronaphthalene | 10.37 | 9.32 | 1.05 |
| 1,2,3,4,5-Pentabromo-6-ethylbenzene | 9.26 | 8.81 | 0.45 |
| 1,2,3,4,5-Pentachloronaphthalene | 9.28 | 8.72 | 0.56 |
| 1,2,3,4,6,7,8-Heptachlorodibenzofuran | 11.17 | 11.34 | -0.17 |
| 1,2,3,4,6,7,8-Heptachlorodibenzo-p-dioxin | 11.42 | 11.38 | 0.04 |
| 1,2,3,4,6,7-Hexachloronaphthalene | 9.69 | 9.32 | 0.37 |
| 1,2,3,4,6,8,9-Heptachlorodibenzofuran | 11.17 | 11.34 | -0.17 |
| 1,2,3,4,6,8-Hexachlorodibenzofuran | 10.44 | 10.74 | -0.30 |
| 1,2,3,4,6-Pentachloronaphthalene | 8.9 | 8.72 | 0.18 |
| 1,2,3,4,7,8,9-Heptachlorodibenzofuran | 11.43 | 11.34 | 0.09 |
| 1,2,3,4,7,8-Hexachlorodibenzofuran | 10.77 | 10.74 | 0.03 |
| 1,2,3,4,7,8-Hexachlorodibenzo-p-dioxin | 11.11 | 10.78 | 0.33 |
| 1,2,3,4,7-Pentachlorodibenzofuran | 10.12 | 10.14 | -0.02 |
| 1,2,3,4,7-Pentachlorodibenzo-p-dioxin | 10.67 | 10.18 | 0.49 |
| 1,2,3,4,8,9-Hexachlorodibenzofuran | 10.95 | 10.74 | 0.21 |
| 1,2,3,4-Tetrachlorobenzene | 5.83 | 5.72 | 0.11 |
| 1,2,3,4-Tetrachlorodibenzofuran | 9.47 | 9.54 | -0.07 |
| 1,2,3,4-Tetrachlorodibenzo-p-dioxin | 9.7 | 9.58 | 0.12 |
| 1,2,3,4-Tetrachloronaphthalene | 8.33 | 8.12 | 0.21 |
| 1,2,3,4-Tetrahydronaphthalene | 4.65 | 5.37 | -0.72 |
| 1,2,3,5,6,7-Hexachloronaphthalene | 9.69 | 9.32 | 0.37 |
| 1,2,3,5,6,8-Hexachloronaphthalene | 9.8 | 9.32 | 0.48 |
| 1,2,3,5,7,8-Hexachloronaphthalene | 9.82 | 9.32 | 0.50 |
| 1,2,3,5,7-Pentachloronaphthalene | 8.72 | 8.72 | 0.00 |
| 1,2,3,5,8-Pentachloronaphthalene | 9.1 | 8.72 | 0.38 |
| 1,2,3,5-Tetrachlorobenzene | 5.78 | 5.72 | 0.06 |
| 1,2,3,5-Tetrachloronaphthalene | 8.26 | 8.12 | 0.14 |
| 1,2,3,6,7,8-Hexachlorodibenzofuran | 10.78 | 10.74 | 0.04 |
| 1,2,3,6,7,8-Hexachlorodibenzo-p-dioxin | 10.97 | 10.78 | 0.19 |
| 1,2,3,6,7-Pentachloronaphthalene | 9.1 | 8.72 | 0.38 |
| 1,2,3,6,8-Pentachloronaphthalene | 9.16 | 8.72 | 0.44 |
| 1,2,3,7,8,9-Hexachlorodibenzofuran | 10.93 | 10.74 | 0.19 |
| 1,2,3,7,8,9-Hexachlorodibenzo-p-dioxin | 11.01 | 10.78 | 0.23 |
| 1,2,3,7,8-Pentachlorodibenzofuran | 10.43 | 10.14 | 0.29 |
| 1,2,3,7,8-Pentachlorodibenzo-p-dioxin | 10.57 | 10.18 | 0.39 |
| 1,2,3,7-Tetrachlorodibenzofuran | 9.42 | 9.54 | -0.12 |
| 1,2,3,7-Tetrachlorodibenzo-p-dioxin | 9.94 | 9.58 | 0.36 |
| 1,2,3,7-Tetrachloronaphthalene | 8.35 | 8.12 | 0.23 |
| 1,2,3,8,9-Pentachlorodibenzofuran | 10.48 | 10.14 | 0.34 |
| 1,2,3,8-Tetrachloronaphthalene | 8.6 | 8.12 | 0.48 |
| 1,2,3-Propanetriol | 7.63 | 7.68 | -0.05 |
| 1,2,3-Trichlorobenzene | 5.16 | 5.12 | 0.04 |
| 1,2,3-Trichloronaphthalene | 7.62 | 7.52 | 0.10 |
| 1,2,3-Trichloropropane | 4.15 | 4.09 | 0.06 |
| 1,2,4,5,6,8-Hexachloronaphthalene | 9.69 | 9.32 | 0.37 |
| 1,2,4,5,6-Pentachloronaphthalene | 9.15 | 8.72 | 0.43 |
| 1,2,4,5,7,8-Hexachloronaphthalene | 9.89 | 9.32 | 0.57 |
| 1,2,4,5,7-Pentachloronaphthalene | 8.86 | 8.72 | 0.14 |
| 1,2,4,5,8-Pentachloronaphthalene | 9.18 | 8.72 | 0.46 |
| 1,2,4,5-Tetrachlorobenzene | 5.8 | 5.72 | 0.08 |
| 1,2,4,5-Tetrachloronaphthalene | 8.58 | 8.12 | 0.46 |
| 1,2,4,5-Tetramethylbenzene | 5.08 | 4.66 | 0.42 |
| 1,2,4,6,7,8-Hexachlorodibenzofuran | 10.5 | 10.74 | -0.24 |
| 1,2,4,6,7,9-Hexachlorodibenzo-p-dioxin | 10.93 | 10.78 | 0.15 |
| 1,2,4,6,7-Pentachloronaphthalene | 8.73 | 8.72 | 0.01 |
| 1,2,4,6,8,9-Hexachlorodibenzofuran | 10.55 | 10.74 | -0.19 |
| 1,2,4,6,8-Pentachloronaphthalene | 8.78 | 8.72 | 0.06 |
| 1,2,4,6-Tetrachloronaphthalene | 8.08 | 8.12 | -0.04 |
| 1,2,4,7,8-Pentachlorodibenzofuran | 9.96 | 10.14 | -0.18 |
| 1,2,4,7,8-Pentachlorodibenzo-p-dioxin | 10.24 | 10.18 | 0.06 |
| 1,2,4,7,8-Pentachloronaphthalene | 9.06 | 8.72 | 0.34 |
| 1,2,4,7-Tetrachloronaphthalene | 8.13 | 8.12 | 0.01 |
| 1,2,4,8-Tetrachloronaphthalene | 8.41 | 8.12 | 0.29 |
| 1,2,4-Trichlorobenzene | 5.1 | 5.12 | -0.02 |
| 1,2,4-Trichlorodibenzo-p-dioxin | 8.97 | 8.98 | -0.01 |
| 1,2,4-Trichloronaphthalene | 7.27 | 7.52 | -0.25 |
| 1,2,4-Trimethylbenzene | 4.2 | 4.28 | -0.08 |
| 1,2,5,6-Tetrabromocyclooctane | 7.4 | 7.54 | -0.14 |
| 1,2,5,6-Tetrachloronaphthalene | 8.22 | 8.12 | 0.10 |
| 1,2,5,6-Tetramethylnaphthalene | 7.33 | 6.94 | 0.39 |
| 1,2,5,7-Tetrachloronaphthalene | 8.08 | 8.12 | -0.04 |
| 1,2,5,8-Tetrachloronaphthalene | 8.4 | 8.12 | 0.28 |
| 1,2,5-Trichloronaphthalene | 7.45 | 7.52 | -0.07 |
| 1,2,6,7-Tetrachloronaphthalene | 8.34 | 8.12 | 0.22 |
| 1,2,6-Trichloronaphthalene | 7.5 | 7.52 | -0.02 |
| 1,2,7,8-Tetrachlorodibenzofuran | 9.78 | 9.54 | 0.24 |
| 1,2,7,8-Tetrachlorodibenzo-p-dioxin | 9.96 | 9.58 | 0.38 |
| 1,2,7,8-Tetrachloronaphthalene | 8.65 | 8.12 | 0.53 |
| 1,2,7-Trichloronaphthalene | 7.54 | 7.52 | 0.02 |
| 1,2,9,10-Tetrachlorodecane | 7.28 | 7.88 | -0.60 |
| 1,2-Benzenedicarboxylic acid, di-2-propenyl ester | 7.92 | 7.9 | 0.02 |
| 1,2-Butanediol | 6.02 | 6.03 | -0.01 |
| 1,2-Butyl dinitrate | 5.01 | 5.31 | -0.30 |
| 1,2-Decyl dinitrate | 7.84 | 7.89 | -0.05 |
| 1,2-Dibromobenzene | 5.2 | 5.18 | 0.02 |
| 1,2-Dibromoethane | 3.69 | 3.56 | 0.13 |
| 1,2-Dibutoxyethane | 5.22 | 5.14 | 0.08 |
| 1,2-Dichlorobenzene | 4.39 | 4.52 | -0.13 |
| 1,2-Dichloronaphthalene | 6.83 | 6.92 | -0.09 |
| 1,2-Dichloropropane | 2.96 | 3.31 | -0.35 |
| 1,2-Difluorobenzene | 2.86 | 2.96 | -0.10 |
| 1,2-Dihydroxybenzene | 7.69 | 8.02 | -0.33 |
| 1,2-Dimethylbenzene | 3.92 | 3.9 | 0.02 |
| 1,2-Dimethylnaphthalene | 6.31 | 6.18 | 0.13 |
| 1,2-Diphenylethane | 7.01 | 6.58 | 0.43 |
| 1,2-Ethanediol | 5.34 | 5.42 | -0.08 |
| 1,2-Ethanediol dinitrate | 4.55 | 4.7 | -0.15 |
| 1,2-Hexyl dinitrate | 5.88 | 6.17 | -0.29 |
| 1,2-Octyl dinitrate | 6.83 | 7.03 | -0.20 |
| 1,2-Pentyl dinitrate | 5.42 | 5.74 | -0.32 |
| 1,2-Propanediol | 5.48 | 5.6 | -0.12 |
| 1,2-Propyl dinitrate | 4.64 | 4.88 | -0.24 |
| 1,3,5,7-Tetrachloronaphthalene | 7.9 | 8.12 | -0.22 |
| 1,3,5,8-Tetrachloronaphthalene | 8.26 | 8.12 | 0.14 |
| 1,3,5-Cycloheptatriene | 3.38 | 3.72 | -0.34 |
| 1,3,5-Tribromo-2-(2,3-dibromopropoxy)benzene | 8.77 | 9.36 | -0.59 |
| 1,3,5-Tribromo-2-prop-2-enoxybenzene | 6.8 | 7.15 | -0.35 |
| 1,3,5-Tribromobenzene | 6.1 | 6.11 | -0.01 |
| 1,3,5-Trichlorobenzene | 4.91 | 5.12 | -0.21 |
| 1,3,5-Trichloronaphthalene | 7.32 | 7.52 | -0.20 |
| 1,3,5-Trichlorotrifluorobenzene | 4.71 | 4.58 | 0.13 |
| 1,3,5-Trimethylbenzene | 4.18 | 4.28 | -0.10 |
| 1,3,5-Trinitrobenzene | 7.83 | 7.58 | 0.25 |
| 1,3,5-Trioxane | 2.55 | 2.63 | -0.08 |
| 1,3,6,8-Tetrachlorodibenzofuran | 9.75 | 9.54 | 0.21 |
| 1,3,6,8-Tetrachlorodibenzo-p-dioxin | 9.38 | 9.58 | -0.20 |
| 1,3,6,8-Tetrachloronaphthalene | 8.22 | 8.12 | 0.10 |
| 1,3,7,8-Tetrachlorodibenzofuran | 9.32 | 9.54 | -0.22 |
| 1,3,7,8-Tetrachlorodibenzo-p-dioxin | 9.86 | 9.58 | 0.28 |
| 1,3,7,9-Tetrachlorodibenzofuran | 9.82 | 9.54 | 0.28 |
| 1,3,7,9-Tetrachlorodibenzo-p-dioxin | 9.93 | 9.58 | 0.35 |
| 1,3,7-Trichlorodibenzo-p-dioxin | 9.63 | 8.98 | 0.65 |
| 1,3,7-Trimethylnaphthalene | 6.61 | 6.56 | 0.05 |
| 1,3-Butyl dinitrate | 5.21 | 5.31 | -0.10 |
| 1,3-Butyleneglycol | 6.01 | 6.03 | -0.02 |
| 1,3-Diaminobenzene | 6.64 | 7.44 | -0.80 |
| 1,3-Dibromobenzene | 5.1 | 5.18 | -0.08 |
| 1,3-Dibromopropane | 3.79 | 3.99 | -0.20 |
| 1,3-Dichloro-2-propanol | 4.31 | 5.08 | -0.77 |
| 1,3-Dichlorobenzene | 4.29 | 4.52 | -0.23 |
| 1,3-Dichlorofluoranthene | 10.11 | 10.7 | -0.59 |
| 1,3-Dichloropropane | 3.53 | 3.31 | 0.22 |
| 1,3-Diethylbenzene | 5.18 | 4.7 | 0.48 |
| 1,3-Difluorobenzene | 2.71 | 2.96 | -0.25 |
| 1,3-Dihydroxybenzene | 9.24 | 8.02 | 1.22 |
| 1,3-Dimethylbenzene | 3.81 | 3.9 | -0.09 |
| 1,3-Dimethylnaphthalene | 6.31 | 6.18 | 0.13 |
| 1,3-Dinitrobenzene | 6.28 | 6.16 | 0.12 |
| 1,3-Dioxolane | 2.41 | 2.57 | -0.16 |
| 1,3-Propanediol | 5.59 | 5.85 | -0.26 |
| 1,4,5,8-Tetrachloronaphthalene | 8.45 | 8.12 | 0.33 |
| 1,4,5-Trichloronaphthalene | 7.56 | 7.52 | 0.04 |
| 1,4,5-Trimethylnaphthalene | 7.04 | 6.56 | 0.48 |
| 1,4,6,7-Tetrachloronaphthalene | 8.13 | 8.12 | 0.01 |
| 1,4,6,7-Tetramethylnaphthalene | 7.16 | 6.94 | 0.22 |
| 1,4,6-Trichloronaphthalene | 7.27 | 7.52 | -0.25 |
| 1,4,6-Trimethylnaphthalene | 6.66 | 6.56 | 0.10 |
| 1,4-Benzoquinone | 4.68 | 4.98 | -0.30 |
| 1,4-Butyl dinitrate | 5.66 | 5.56 | 0.10 |
| 1,4-Cyclohexadiene | 2.71 | 3.5 | -0.79 |
| 1,4-Diaminoanthraquinone | 10.85 | 10.36 | 0.49 |
| 1,4-Dibromobenzene | 5.21 | 5.18 | 0.03 |
| 1,4-Dibromobutane | 4.48 | 4.42 | 0.06 |
| 1,4-Dichlorobenzene | 4.3 | 4.52 | -0.22 |
| 1,4-Dichloronaphthalene | 6.92 | 6.92 | 0.00 |
| 1,4-Diethylbenzene | 4.75 | 4.7 | 0.05 |
| 1,4-Difluorobenzene | 2.93 | 2.96 | -0.03 |
| 1,4-Dihydroxybenzene | 9.03 | 8.02 | 1.01 |
| 1,4-Dimethylbenzene | 3.79 | 3.9 | -0.11 |
| 1,4-Dimethylnaphthalene | 6.51 | 6.18 | 0.33 |
| 1,4-Dinitrobenzene | 6.28 | 6.16 | 0.12 |
| 1,4-Dinitrobutane | 4.61 | 4.88 | -0.27 |
| 1,4-Dioxane | 3.17 | 2.9 | 0.27 |
| 1,4-Pentadiene | 1.87 | 2.04 | -0.17 |
| 1,4-Pentyl dinitrate | 5.8 | 5.74 | 0.06 |
| 1,5-Dichloronaphthalene | 6.65 | 6.92 | -0.27 |
| 1,5-Dichloropentane | 4.47 | 4.17 | 0.30 |
| 1,5-Dimethylnaphthalene | 6.3 | 6.18 | 0.12 |
| 1,5-Hexadiene | 2.21 | 2.44 | -0.23 |
| 1,5-Hexyl dinitrate | 6.04 | 6.17 | -0.13 |
| 1,5-Pentanediol | 7.38 | 6.71 | 0.67 |
| 1,5-Pentyl dinitrate | 6.02 | 5.99 | 0.03 |
| 1,6,7-Trichloronaphthalene | 7.54 | 7.52 | 0.02 |
| 1,6-Dimethylnaphthalene | 6.22 | 6.18 | 0.04 |
| 1,6-Hexanedioic acid | 10.74 | 10.62 | 0.12 |
| 1,6-Hexyl dinitrate | 6.69 | 6.42 | 0.27 |
| 1,7-Dimethylnaphthalene | 6.49 | 6.18 | 0.31 |
| 1,7-Heptyl dinitrate | 7.23 | 6.85 | 0.38 |
| 1,8-Cineole | 4.87 | 4.67 | 0.20 |
| 1,8-Dichlorooctane | 5.92 | 5.46 | 0.46 |
| 1,8-Dimethylnaphthalene | 6.56 | 6.18 | 0.38 |
| 1,8-Octyl dinitrate | 7.71 | 7.28 | 0.43 |
| 12-Oxahexadecanolide | 7.74 | 7.25 | 0.49 |
| 1-Aminoanthraquinone | 10.28 | 9.81 | 0.47 |
| 1-Bromo-3-chloropropane | 3.72 | 3.65 | 0.07 |
| 1-Bromo-3-fluorobenzene | 3.8 | 4.07 | -0.27 |
| 1-Bromo-4-chlorobenzene | 4.81 | 4.85 | -0.04 |
| 1-Bromo-4-fluorobenzene | 4.11 | 4.07 | 0.04 |
| 1-Bromobutane | 3.08 | 3.3 | -0.22 |
| 1-Bromodecane | 5.99 | 5.88 | 0.11 |
| 1-Bromonaphthalene | 6.03 | 6.65 | -0.62 |
| 1-Bromooctane | 4.72 | 5.02 | -0.30 |
| 1-Bromopentane | 3.51 | 3.73 | -0.22 |
| 1-Bromopropane | 2.53 | 2.87 | -0.34 |
| 1-Bromopyrene | 10.1 | 10.83 | -0.73 |
| 1-Butanol | 4.1 | 4.2 | -0.10 |
| 1-Butene | 1.5 | 1.85 | -0.35 |
| 1-Butylamine | 3.61 | 3.98 | -0.37 |
| 1-Butyne | 1.59 | 1.92 | -0.33 |
| 1-Chloro-1,1-difluoroethane | 1.27 | 1.37 | -0.10 |
| 1-Chloro-2,4-dinitrobenzene | 7.02 | 6.76 | 0.26 |
| 1-Chloro-2-[2,2,2-trichloro-1-(4-chlorophenyl)ethyl]benzene | 9.74 | 9.6 | 0.14 |
| 1-Chloro-2-[2,2-dichloro-1-(4-chlorophenyl)vinyl]benzene | 9.26 | 9.28 | -0.02 |
| 1-Chloro-3-fluorobenzene | 3.4 | 3.74 | -0.34 |
| 1-Chlorobutane | 2.72 | 2.96 | -0.24 |
| 1-Chlorodibenzo-p-dioxin | 7.86 | 7.78 | 0.08 |
| 1-Chloroheptane | 4.07 | 4.25 | -0.18 |
| 1-Chlorohexane | 3.76 | 3.82 | -0.06 |
| 1-Chloronaphthalene | 5.81 | 6.32 | -0.51 |
| 1-Chlorooctane | 4.55 | 4.68 | -0.13 |
| 1-Chloropentane | 3.19 | 3.39 | -0.20 |
| 1-Chloropropane | 2.24 | 2.53 | -0.29 |
| 1-Chloropyrene | 9.71 | 10.5 | -0.79 |
| 1-Decene | 4.47 | 4.25 | 0.22 |
| 1-Dodecanol | 7.78 | 7.64 | 0.14 |
| 1-Ethoxy-butane | 3.16 | 3.23 | -0.07 |
| 1-Ethylnaphthalene | 6.2 | 6.2 | 0.00 |
| 1H-Benzotriazole | 5.99 | 5.91 | 0.08 |
| 1-Heptanol | 5.51 | 5.49 | 0.02 |
| 1-Heptene | 2.93 | 3.05 | -0.12 |
| 1-Heptyne | 2.97 | 3.12 | -0.15 |
| 1-Hexadecanol | 9.9 | 9.36 | 0.54 |
| 1-Hexanol | 5.18 | 5.06 | 0.12 |
| 1-Hexene | 2.41 | 2.65 | -0.24 |
| 1-Hexyne | 2.58 | 2.72 | -0.14 |
| 1-Hydroxyanthraquinone | 9.87 | 10.1 | -0.23 |
| 1-Iodobutane | 3.33 | 3.38 | -0.05 |
| 1-Iodoheptane | 4.68 | 4.67 | 0.01 |
| 1-Iodopentane | 3.81 | 3.81 | 0.00 |
| 1-Methyl-4-isopropyl-7-oxabicyclo[2.2.1]heptane | 5.06 | 4.78 | 0.28 |
| 1-Methyl-4-isopropylcyclohexene | 4.04 | 4.33 | -0.29 |
| 1-Methylfluorene | 7.75 | 7.52 | 0.23 |
| 1-Methylnaphthalene | 5.57 | 5.8 | -0.23 |
| 1-Methylphenanthrene | 7.89 | 8.08 | -0.19 |
| 1-Naphthaleneacetic acid | 9.33 | 9.75 | -0.42 |
| 1-Naphthylamine | 7.42 | 7.78 | -0.36 |
| 1-Nitrobutane | 3.67 | 3.53 | 0.14 |
| 1-Nitronaphthalene | 7.24 | 7.14 | 0.10 |
| 1-Nitrooxy-2-butanol | 5.83 | 5.64 | 0.19 |
| 1-Nitrooxy-2-propanol | 5.62 | 5.21 | 0.41 |
| 1-Nitropentane | 4.03 | 3.96 | 0.07 |
| 1-Nitropropane | 3.25 | 3.1 | 0.15 |
| 1-Nonanol | 6.5 | 6.35 | 0.15 |
| 1-Nonene | 3.83 | 3.85 | -0.02 |
| 1-Nonyne | 3.93 | 3.92 | 0.01 |
| 1-Octadecanol | 10.93 | 10.22 | 0.71 |
| 1-Octanol | 6.03 | 5.92 | 0.11 |
| 1-Octen-3-ol | 5.13 | 5.46 | -0.33 |
| 1-Octyne | 3.53 | 3.52 | 0.01 |
| 1-Pentanol | 4.69 | 4.63 | 0.06 |
| 1-Pentene | 1.93 | 2.25 | -0.32 |
| 1-Pentyl nitrate | 3.03 | 4.3 | -1.27 |
| 1-Pentyne | 2 | 2.32 | -0.32 |
| 1-Phenyl-1-propanone | 5.46 | 5.24 | 0.22 |
| 1-Propanol | 3.68 | 3.77 | -0.09 |
| 1-Propylamine | 3.6 | 3.55 | 0.05 |
| 1-Tridecanol | 8.19 | 8.07 | 0.12 |
| 1-Undecanol | 7.27 | 7.21 | 0.06 |
| 2-(3,4-Epoxycyclohexyl)ethyltriethoxysilane | 8.45 | 7.88 | 0.57 |
| 2-(4-Bromophenoxy)phenol | 8.3 | 9.46 | -1.16 |
| 2,2,2-Trichloroethanol | 5.15 | 5.03 | 0.12 |
| 2,2,2-Trifluoroethanol | 3.33 | 3.35 | -0.02 |
| 2,2,3,3,3-Pentafluoro-1-propanol | 3.69 | 3.58 | 0.11 |
| 2,2',3,3',4,4',5,5',6-Nonachlorobiphenyl | 11.47 | 11.54 | -0.07 |
| 2,2',3,3',4,4',5,5'-Octachlorobiphenyl | 11.31 | 10.94 | 0.37 |
| 2,2',3,3',4,4',5,6,6'-Nonachlorobiphenyl | 10.93 | 11.54 | -0.61 |
| 2,2',3,3',4,4',5,6'-Octachlorobiphenyl | 10.82 | 10.94 | -0.12 |
| 2,2',3,3',4,4',5,6-Octachlorobiphenyl | 11.12 | 10.94 | 0.18 |
| 2,2',3,3',4,4',5-Heptachlorobiphenyl | 10.78 | 10.34 | 0.44 |
| 2,2',3,3',4,4',6,6'-Octachlorobiphenyl | 10.22 | 10.94 | -0.72 |
| 2,2',3,3',4,4',6-Heptachlorobiphenyl | 10.25 | 10.34 | -0.09 |
| 2,2',3,3',4,4'-Hexachlorobiphenyl | 10.36 | 9.74 | 0.62 |
| 2,2',3,3',4,4'-Hexachlorodiphenyl ether | 9.55 | 9.78 | -0.23 |
| 2,2',3,3',4,5,5',6,6'-Nonachlorobiphenyl | 10.93 | 11.54 | -0.61 |
| 2,2',3,3',4,5,5',6'-Octachlorobiphenyl | 10.67 | 10.94 | -0.27 |
| 2,2',3,3',4,5,5',6-Octachlorobiphenyl | 10.73 | 10.94 | -0.21 |
| 2,2',3,3',4,5,5'-Heptachlorobiphenyl | 10.38 | 10.34 | 0.04 |
| 2,2',3,3',4,5,6,6'-Octachlorobiphenyl | 10.74 | 10.94 | -0.20 |
| 2,2',3,3',4,5',6,6'-Octachlorobiphenyl | 10.51 | 10.94 | -0.43 |
| 2,2',3,3',4,5',6-Heptachlorobiphenyl | 9.88 | 10.34 | -0.46 |
| 2,2',3,3',4,5,6'-Heptachlorobiphenyl | 10.22 | 10.34 | -0.12 |
| 2,2',3,3',4,5',6'-Heptachlorobiphenyl | 10.29 | 10.34 | -0.05 |
| 2,2',3,3',4,5,6-Heptachlorobiphenyl | 10.3 | 10.34 | -0.04 |
| 2,2',3,3',4,5'-Hexachlorobiphenyl | 9.3 | 9.74 | -0.44 |
| 2,2',3,3',4,5-Hexachlorobiphenyl | 10.07 | 9.74 | 0.33 |
| 2,2',3,3',4,6,6'-Heptachlorobiphenyl | 9.8 | 10.34 | -0.54 |
| 2,2',3,3',4,6'-Hexachlorobiphenyl | 9.8 | 9.74 | 0.06 |
| 2,2',3,3',4,6-Hexachlorobiphenyl | 9.49 | 9.74 | -0.25 |
| 2,2',3,3',4-Pentabromodiphenyl ether | 11.14 | 10.83 | 0.31 |
| 2,2',3,3',5,5',6,6'-Octachlorobiphenyl | 10.08 | 10.94 | -0.86 |
| 2,2',3,3',5,5',6-Heptachlorobiphenyl | 9.83 | 10.34 | -0.51 |
| 2,2',3,3',5,6,6'-Heptachlorobiphenyl | 9.81 | 10.34 | -0.53 |
| 2,2',3,3',5,6'-Hexachlorobiphenyl | 9.42 | 9.74 | -0.32 |
| 2,2',3,3',5,6-Hexachlorobiphenyl | 9.44 | 9.74 | -0.30 |
| 2,2',3,3',5-Pentachlorobiphenyl | 9.13 | 9.14 | -0.01 |
| 2,2',3,3',6,6'-Hexachlorobiphenyl | 9.27 | 9.74 | -0.47 |
| 2,2',3,3',6-Pentachlorobiphenyl | 8.8 | 9.14 | -0.34 |
| 2,2',3,3'-Tetrachlorobiphenyl | 8.86 | 8.54 | 0.32 |
| 2,2',3,4,4',5,5',6-Octachlorobiphenyl | 10.79 | 10.94 | -0.15 |
| 2,2',3,4,4',5,5'-Heptachlorobiphenyl | 10.52 | 10.34 | 0.18 |
| 2,2',3,4,4',5,5'-Heptachlorodiphenyl ether | 9.15 | 10.38 | -1.23 |
| 2,2',3,4,4',5,6-Heptachlorobiphenyl | 10.51 | 10.34 | 0.17 |
| 2,2',3,4,4',5',6-Heptachlorobiphenyl | 10.32 | 10.34 | -0.02 |
| 2,2',3,4,4',5'-Hexachlorobiphenyl | 9.81 | 9.74 | 0.07 |
| 2,2',3,4,4',5-Hexachlorobiphenyl | 10.1 | 9.74 | 0.36 |
| 2,2',3,4,4',5'-Hexachlorodiphenyl ether | 9.45 | 9.78 | -0.33 |
| 2,2',3,4,4',5-Hexachlorodiphenyl ether | 9.14 | 9.78 | -0.64 |
| 2,2',3,4,4',6-Hexachlorobiphenyl | 9.62 | 9.74 | -0.12 |
| 2,2',3,4,4',6'-Hexachlorodiphenyl ether | 9.04 | 9.78 | -0.74 |
| 2,2',3,4,4'-Pentabromodiphenyl ether | 11.63 | 10.83 | 0.80 |
| 2,2',3,4,4'-Pentachlorobiphenyl | 9.52 | 9.14 | 0.38 |
| 2,2',3,4,4'-Pentachlorodiphenyl ether | 8.71 | 9.18 | -0.47 |
| 2,2',3,4,5,5',6-Heptachlorobiphenyl | 10.4 | 10.34 | 0.06 |
| 2,2',3,4',5,5',6-Heptachlorobiphenyl | 10.27 | 10.34 | -0.07 |
| 2,2',3,4,5,5'-Hexachlorobiphenyl | 9.79 | 9.74 | 0.05 |
| 2,2',3,4',5,5'-Hexachlorobiphenyl | 9.56 | 9.74 | -0.18 |
| 2,2',3,4',5,6-Hexachlorobiphenyl | 9.39 | 9.74 | -0.35 |
| 2,2',3,4,5',6-Hexachlorobiphenyl | 9.34 | 9.74 | -0.40 |
| 2,2',3,4',5',6-Hexachlorobiphenyl | 9.47 | 9.74 | -0.27 |
| 2,2',3,4,5'-Pentachlorobiphenyl | 9.21 | 9.14 | 0.07 |
| 2,2',3,4',5'-Pentachlorobiphenyl | 9.18 | 9.14 | 0.04 |
| 2,2',3,4',6-Pentachlorobiphenyl | 8.94 | 9.14 | -0.20 |
| 2,2',3,4'-Tetrachlorobiphenyl | 8.64 | 8.54 | 0.10 |
| 2,2',3,4-Tetrachlorobiphenyl | 8.58 | 8.54 | 0.04 |
| 2,2',3,5,5',6-Hexachlorobiphenyl | 9.61 | 9.74 | -0.13 |
| 2,2',3,5',6-Pentachlorobiphenyl | 8.8 | 9.14 | -0.34 |
| 2,2',3,5'-Tetrachlorobiphenyl | 8.36 | 8.54 | -0.18 |
| 2,2',3,6,6'-Pentachlorobiphenyl | 8.53 | 9.14 | -0.61 |
| 2,2',3,6'-Tetrachlorobiphenyl | 8.32 | 8.54 | -0.22 |
| 2,2',3,6-Tetrachlorobiphenyl | 8.62 | 8.54 | 0.08 |
| 2,2',3-Trichlorobiphenyl | 7.76 | 7.94 | -0.18 |
| 2,2',4,4',5,5'-Hexabromobiphenyl | 12 | 11.72 | 0.28 |
| 2,2',4,4',5,5'-Hexabromodiphenyl ether | 12.15 | 11.76 | 0.39 |
| 2,2',4,4',5,5'-Hexachlorobiphenyl | 9.8 | 9.74 | 0.06 |
| 2,2',4,4',5,5'-Hexachlorodiphenyl ether | 8.64 | 9.78 | -1.14 |
| 2,2',4,4',5,6'-Hexabromodiphenyl ether | 11.94 | 11.76 | 0.18 |
| 2,2',4,4',5,6'-Hexachlorodiphenyl ether | 8.41 | 9.78 | -1.37 |
| 2,2',4,4',5-Pentabromodiphenyl ether | 11.45 | 10.83 | 0.62 |
| 2,2',4,4',5-Pentachlorobiphenyl | 9.24 | 9.14 | 0.10 |
| 2,2',4,4',5-Pentachlorodiphenyl ether | 8.39 | 9.18 | -0.79 |
| 2,2',4,4',6,6'-Hexachlorobiphenyl | 8.99 | 9.74 | -0.75 |
| 2,2',4,4',6-Pentabromodiphenyl ether | 11.18 | 10.83 | 0.35 |
| 2,2',4,4',6-Pentachlorodiphenyl ether | 8.14 | 9.18 | -1.04 |
| 2,2',4,4'-Tetrabromodiphenyl ether | 10.34 | 9.9 | 0.44 |
| 2,2',4,4'-Tetrachlorobiphenyl | 8.31 | 8.54 | -0.23 |
| 2,2',4,4'-Tetrachlorodiphenyl ether | 8.08 | 8.58 | -0.50 |
| 2,2',4,5,5'-PCB | 9.04 | 9.14 | -0.10 |
| 2,2',4,5,5'-Pentachlorodiphenyl ether | 8.14 | 9.18 | -1.04 |
| 2,2',4,5',6-Pentabromobiphenyl | 10.46 | 10.79 | -0.33 |
| 2,2',4,5'-Tetrabromobiphenyl | 9.83 | 9.86 | -0.03 |
| 2,2',4,5'-Tetrachlorobiphenyl | 8.3 | 8.54 | -0.24 |
| 2,2',4,5-Tetrachlorobiphenyl | 8.25 | 8.54 | -0.29 |
| 2,2',4,6,6'-Pentachlorobiphenyl | 8.16 | 9.14 | -0.98 |
| 2,2',4,6'-Tetrachlorobiphenyl | 7.95 | 8.54 | -0.59 |
| 2,2',4-Tribromodiphenyl ether | 9.27 | 8.97 | 0.30 |
| 2,2',4-Trichlorobiphenyl | 7.51 | 7.94 | -0.43 |
| 2,2',4-Trichlorodiphenylether | 8.09 | 7.98 | 0.11 |
| 2,2',5,5'-Tetrachlorobiphenyl | 8.25 | 8.54 | -0.29 |
| 2,2',5,6'-Tetrachlorobiphenyl | 7.93 | 8.54 | -0.61 |
| 2,2',5-Trichlorobiphenyl | 7.56 | 7.94 | -0.38 |
| 2,2',6,6'-Tetrachlorobiphenyl | 7.76 | 8.54 | -0.78 |
| 2,2',6-Trichlorobiphenyl | 7.54 | 7.94 | -0.40 |
| 2,2-Dichloro-1,1,1-trifluoroethane | 1.78 | 2.58 | -0.80 |
| 2,2'-Dichlorobiphenyl | 6.86 | 7.34 | -0.48 |
| 2,2'-Dichlorodiisopropyl ether | 4.3 | 4.29 | 0.01 |
| 2,2-Dichloropropane | 2.3 | 2.56 | -0.26 |
| 2,2-Dichloropropionic acid | 6.53 | 5.75 | 0.78 |
| 2,2-Dimethyl-1,3-dioxolane | 3.38 | 3.59 | -0.21 |
| 2,2-Dimethylpropane | 1.41 | 1.66 | -0.25 |
| 2,3,3',4,4',5,5',6-Octachlorobiphenyl | 11.31 | 10.94 | 0.37 |
| 2,3,3',4,4',5,5'-Heptachlorobiphenyl | 11.22 | 10.34 | 0.88 |
| 2,3,3',4,4',5,6-Heptachlorobiphenyl | 10.57 | 10.34 | 0.23 |
| 2,3,3',4,4',5',6-Heptachlorobiphenyl | 10.62 | 10.34 | 0.28 |
| 2,3,3',4,4',5-Hexabromodiphenyl ether | 11.98 | 11.76 | 0.22 |
| 2,3,3',4,4',5'-Hexachlorobiphenyl | 10.77 | 9.74 | 1.03 |
| 2,3,3',4,4',5-Hexachlorobiphenyl | 10.57 | 9.74 | 0.83 |
| 2,3,3',4,4',6-Hexachlorobiphenyl | 9.86 | 9.74 | 0.12 |
| 2,3,3',4,4'-Pentachlorobiphenyl | 9.53 | 9.14 | 0.39 |
| 2,3,3',4,4'-Pentachlorodiphenyl ether | 8.89 | 9.18 | -0.29 |
| 2,3,3',4',5,5',6-Heptachlorobiphenyl | 10.53 | 10.34 | 0.19 |
| 2,3,3',4,5,5'-Hexachlorobiphenyl | 9.91 | 9.74 | 0.17 |
| 2,3,3',4,5,6-Hexachlorobiphenyl | 10.32 | 9.74 | 0.58 |
| 2,3,3',4',5,6-Hexachlorobiphenyl | 9.89 | 9.74 | 0.15 |
| 2,3,3',4',6-Pentachlorobiphenyl | 9.06 | 9.14 | -0.08 |
| 2,3,3',4'-Tetrachlorobiphenyl | 8.45 | 8.54 | -0.09 |
| 2,3,3',4-Tetrachlorobiphenyl | 8.81 | 8.54 | 0.27 |
| 2,3,3',5,5',6-Hexachlorobiphenyl | 10.36 | 9.74 | 0.62 |
| 2,3,3'-Trichlorobiphenyl | 8.24 | 7.94 | 0.30 |
| 2,3',4,4',5,5'-Hexachlorodiphenyl ether | 8.93 | 9.78 | -0.85 |
| 2,3,4,4',5,6-Hexachlorobiphenyl | 10 | 9.74 | 0.26 |
| 2,3,4,4',5-Pentachlorobiphenyl | 10.04 | 9.14 | 0.90 |
| 2,3',4,4',5-Pentachlorobiphenyl | 9.47 | 9.14 | 0.33 |
| 2,3',4,4',6-Pentabromodiphenyl ether | 11.52 | 10.83 | 0.69 |
| 2,3',4,4',6-Pentachlorobiphenyl | 9.03 | 9.14 | -0.11 |
| 2,3',4,4'-Tetrabromodiphenyl ether | 10.58 | 9.9 | 0.68 |
| 2,3,4,4'-Tetrachlorobiphenyl | 9.13 | 8.54 | 0.59 |
| 2,3',4,4'-Tetrachlorobiphenyl | 9.02 | 8.54 | 0.48 |
| 2,3',4,4'-Tetrachlorodiphenyl ether | 8.22 | 8.58 | -0.36 |
| 2,3,4,5,6-Pentachlorobiphenyl | 9.06 | 9.14 | -0.08 |
| 2,3,4,5,6-Pentafluorotoluene | 3.19 | 2.83 | 0.36 |
| 2,3,4,5-Tetrachloroanisole | 5.9 | 6.24 | -0.34 |
| 2,3',4,5-Tetrachlorobiphenyl | 9.11 | 8.54 | 0.57 |
| 2,3,4',5-Tetrachlorobiphenyl | 8.79 | 8.54 | 0.25 |
| 2,3',4',5-Tetrachlorobiphenyl | 8.87 | 8.54 | 0.33 |
| 2,3,4,6,7,8-Hexachlorodibenzofuran | 10.87 | 10.74 | 0.13 |
| 2,3',4,6-Tetrabromodiphenyl ether | 10.23 | 9.9 | 0.33 |
| 2,3,4,6-Tetrachloroanisole | 6.02 | 6.24 | -0.22 |
| 2,3',4,6-Tetrachlorobiphenyl | 8.38 | 8.54 | -0.16 |
| 2,3,4',6-Tetrachlorobiphenyl | 8.38 | 8.54 | -0.16 |
| 2,3',4',6-Tetrachlorobiphenyl | 8.61 | 8.54 | 0.07 |
| 2,3,4,6-Tetrachlorophenol | 8.01 | 8.07 | -0.06 |
| 2,3,4,7,8-Pentachlorodibenzofuran | 10.37 | 10.14 | 0.23 |
| 2,3,4-Tribromoanisole | 6.36 | 6.63 | -0.27 |
| 2,3,4-Tribromodiphenylether | 9.49 | 8.97 | 0.52 |
| 2,3,4-Trichloroanisole | 5.61 | 5.64 | -0.03 |
| 2,3',4-Trichlorobiphenyl | 8.02 | 7.94 | 0.08 |
| 2,3,4'-Trichlorobiphenyl | 8.33 | 7.94 | 0.39 |
| 2,3',4'-Trichlorobiphenyl | 8.2 | 7.94 | 0.26 |
| 2',3,4-Trichlorodiphenylether | 8.59 | 7.98 | 0.61 |
| 2,3',4-Trichlorodiphenylether | 8.43 | 7.98 | 0.45 |
| 2,3,4'-Trichlorodiphenylether | 8.72 | 7.98 | 0.74 |
| 2,3,4-Trimethylpentane | 3.2 | 2.63 | 0.57 |
| 2,3,5,6-Tetrabromo-p-xylene | 8.85 | 7.86 | 0.99 |
| 2,3,5,6-Tetrachloroanisole | 5.71 | 6.24 | -0.53 |
| 2,3,5,6-Tetrachlorobiphenyl | 8.18 | 8.54 | -0.36 |
| 2,3,5,6-Tetrachloropyridine | 5.41 | 5.93 | -0.52 |
| 2,3',5-Tribromobiphenyl | 9.13 | 8.93 | 0.20 |
| 2,3,5-Trichloroanisole | 5.39 | 5.64 | -0.25 |
| 2,3',5'-Trichlorobiphenyl | 8.03 | 7.94 | 0.09 |
| 2,3',5-Trichlorobiphenyl | 7.99 | 7.94 | 0.05 |
| 2,3,5-Trichlorodiphenylether | 8.55 | 7.98 | 0.57 |
| 2,3,5-Trichlorophenol | 7.33 | 7.47 | -0.14 |
| 2,3,6,7-Tetrachloronaphthalene | 8.4 | 8.12 | 0.28 |
| 2,3,6-Tribromoanisole | 6.48 | 6.63 | -0.15 |
| 2,3,6-Trichloroanisole | 5.22 | 5.64 | -0.42 |
| 2,3,6-Trichlorobiphenyl | 7.94 | 7.94 | 0.00 |
| 2,3,6-Trichlorodiphenylether | 7.4 | 7.98 | -0.58 |
| 2,3,6-Trimethylnaphthalene | 6.68 | 6.56 | 0.12 |
| 2,3,7,8-Tetrachlorodibenzofuran | 9.89 | 9.54 | 0.35 |
| 2,3,7,8-Tetrachlorodibenzo-p-dioxin | 10.05 | 9.58 | 0.47 |
| 2,3,7-Trichlorodibenzo-p-dioxin | 9.14 | 8.98 | 0.16 |
| 2,3,8-Trichlorodibenzofuran | 8.93 | 8.94 | -0.01 |
| 2,3-Butanedione | 2.92 | 3.48 | -0.56 |
| 2,3-Butyl dinitrate | 4.78 | 5.06 | -0.28 |
| 2,3-Butyleneglycol | 5.3 | 5.78 | -0.48 |
| 2,3-Dibromo-5,6-dichloroanisole | 6.64 | 6.9 | -0.26 |
| 2,3-Dichloro-1.4-naphthoquinone | 7.72 | 7.68 | 0.04 |
| 2,3-Dichloroanisole | 5.06 | 5.04 | 0.02 |
| 2,3'-Dichlorobiphenyl | 7.31 | 7.34 | -0.03 |
| 2,3-Dichlorobiphenyl | 7.35 | 7.34 | 0.01 |
| 2,3-Dichlorodibenzofuran | 8.3 | 8.34 | -0.04 |
| 2,3-Dichlorodibenzo-p-dioxin | 8.5 | 8.38 | 0.12 |
| 2,3-Dichloronitrobenzene | 6.55 | 5.94 | 0.61 |
| 2,3-Dichlorophenol | 6.15 | 6.87 | -0.72 |
| 2,3-Dichloropropene | 3.12 | 2.6 | 0.52 |
| 2,3-Diethyl-5-methylpyrazine | 5.15 | 5.76 | -0.61 |
| 2,3-Dimethyl-2-butanol | 4.35 | 4.27 | 0.08 |
| 2,3-Dimethylbutane | 1.84 | 2.16 | -0.32 |
| 2,3-Naphthalenediol | 10.64 | 10.42 | 0.22 |
| 2,3-Xylenol | 6.87 | 6.49 | 0.38 |
| 2,3-Xylidine | 5.77 | 6.2 | -0.43 |
| 2,4,4',5-Tetrachlorobiphenyl | 8.86 | 8.54 | 0.32 |
| 2,4,4',5-Tetrachlorodiphenyl ether | 7.95 | 8.58 | -0.63 |
| 2,4,4',6-Tetrabromodiphenyl ether | 10.13 | 9.9 | 0.23 |
| 2,4,4',6-Tetrachlorobiphenyl | 8.09 | 8.54 | -0.45 |
| 2,4,4'-Tribromodiphenyl ether | 9.46 | 8.97 | 0.49 |
| 2,4,4'-Trichlorobiphenyl | 7.92 | 7.94 | -0.02 |
| 2,4,4'-Trichlorodiphenyl ether | 7.61 | 7.98 | -0.37 |
| 2,4,5-T | 9.59 | 9.13 | 0.46 |
| 2,4',5-Tribromobiphenyl | 9.21 | 8.93 | 0.28 |
| 2,4,5-Trichloroanisole | 5.43 | 5.64 | -0.21 |
| 2,4,5-Trichlorobiphenyl | 7.96 | 7.94 | 0.02 |
| 2,4',5-Trichlorobiphenyl | 7.92 | 7.94 | -0.02 |
| 2,4,5-Trichlorodiphenyl ether | 7.12 | 7.98 | -0.86 |
| 2,4',5-Trichlorodiphenyl ether | 8.46 | 7.98 | 0.48 |
| 2,4,5-Trichlorophenol | 6.9 | 7.47 | -0.57 |
| 2,4,5-Trimethylaniline | 6.15 | 6.61 | -0.46 |
| 2,4,5-Trimethylnaphthalene | 6.81 | 6.56 | 0.25 |
| 2,4,6-Collidine | 5.15 | 4.56 | 0.59 |
| 2,4,6-Tribromo-3-chloroanisole | 6.64 | 7.23 | -0.59 |
| 2,4,6-Tribromoanisole | 6.21 | 6.63 | -0.42 |
| 2,4,6-Tribromodiphenyl ether | 9.02 | 8.97 | 0.05 |
| 2,4',6-Tribromodiphenyl ether | 9.28 | 8.97 | 0.31 |
| 2,4,6-Trichloroanisole | 5.17 | 5.64 | -0.47 |
| 2,4,6-Trichlorobiphenyl | 7.56 | 7.94 | -0.38 |
| 2,4',6-Trichlorobiphenyl | 7.74 | 7.94 | -0.20 |
| 2,4,6-Trichlorodibenzofuran | 8.82 | 8.94 | -0.12 |
| 2,4',6-Trichlorodiphenylether | 7.49 | 7.98 | -0.49 |
| 2,4,6-Trichlorophenol | 6.96 | 7.47 | -0.51 |
| 2,4,8-Trichlorodibenzofuran | 8.82 | 8.94 | -0.12 |
| 2,4-Dibromo-3,5-dichloroanisole | 6.64 | 6.9 | -0.26 |
| 2,4-Dibromo-3-chloroanisole | 6.06 | 6.3 | -0.24 |
| 2,4-Dibromo-5,6-dichloroanisole | 6.35 | 6.9 | -0.55 |
| 2,4-Dibromo-5-chloroanisole | 6.18 | 6.3 | -0.12 |
| 2,4-Dibromoanisole | 6.05 | 5.7 | 0.35 |
| 2,4'-Dibromodiphenyl ether | 8.47 | 8.04 | 0.43 |
| 2,4-Dibromodiphenyl ether | 8.37 | 8.04 | 0.33 |
| 2,4-Dichloroanisole | 4.96 | 5.04 | -0.08 |
| 2,4'-Dichlorobiphenyl | 7.37 | 7.34 | 0.03 |
| 2,4-Dichlorobiphenyl | 7.15 | 7.34 | -0.19 |
| 2,4-Dichlorodiphenyl ether | 7.7 | 7.38 | 0.32 |
| 2,4-Dichloronitrobenzene | 6.15 | 5.94 | 0.21 |
| 2,4-Dichlorophenol | 6.72 | 6.87 | -0.15 |
| 2,4-Dichlorotoluene | 5.17 | 4.93 | 0.24 |
| 2,4-Dimethyl-3-pentanone | 3.82 | 3.54 | 0.28 |
| 2,4-Dimethylpentane | 2.63 | 2.54 | 0.09 |
| 2,4-Dinitrotoluene | 6.96 | 6.57 | 0.39 |
| 2,4-Lutidine | 5.22 | 4.48 | 0.74 |
| 2,4-Xylenol | 6.58 | 6.49 | 0.09 |
| 2,4-Xylidine | 5.37 | 6.2 | -0.83 |
| 2,5-Dichloroanisole | 5 | 5.04 | -0.04 |
| 2,5-Dichlorobiphenyl | 7.16 | 7.34 | -0.18 |
| 2,5-Dimethyl-2,4-hexadiene | 3.31 | 3.22 | 0.09 |
| 2,5-Dimethylhexane | 3.1 | 2.92 | 0.18 |
| 2,5-Dimethylpyrazine | 4.69 | 4.82 | -0.13 |
| 2,5-Dinitrophenol | 7.06 | 7 | 0.06 |
| 2,5-Dinitrotoluene | 6.53 | 6.57 | -0.04 |
| 2,5-Hexanediol | 7.25 | 6.64 | 0.61 |
| 2,5-Hexyl dinitrate | 5.93 | 5.92 | 0.01 |
| 2,5-Xylenol | 6.54 | 6.49 | 0.05 |
| 2,5-Xylidine | 5.5 | 6.2 | -0.70 |
| 2,6-Dibromo-3,4,5-trichloroanisole | 6.88 | 7.5 | -0.62 |
| 2,6-Dibromo-4-chloroanisole | 5.77 | 6.3 | -0.53 |
| 2,6-Dibromoanisole | 5.37 | 5.7 | -0.33 |
| 2,6-Dibromodiphenyl ether | 8.12 | 8.04 | 0.08 |
| 2,6-Dichloro-4-nitroaniline | 8.1 | 8 | 0.10 |
| 2,6-Dichloroanisole | 4.55 | 5.04 | -0.49 |
| 2,6-Dichlorobenzonitrile | 5.71 | 5.73 | -0.02 |
| 2,6-Dichlorobiphenyl | 7.18 | 7.34 | -0.16 |
| 2,6-Dichlorodiphenyl ether | 6.82 | 7.38 | -0.56 |
| 2,6-Dichlorophenol | 6.03 | 6.87 | -0.84 |
| 2,6-Dichlorotoluene | 5.13 | 4.93 | 0.20 |
| 2,6-Diisopropylnaphthalene | 8.1 | 7.2 | 0.90 |
| 2,6-Dimethoxyphenol | 6.05 | 6.71 | -0.66 |
| 2,6-Dimethylnaphthalene | 6.3 | 6.18 | 0.12 |
| 2,6-Dimethyl-N-nitrosomorpholine | 5.05 | 5.31 | -0.26 |
| 2,6-Dimethylpyrazine | 3.8 | 4.82 | -1.02 |
| 2,6-Dinitro-4-methylphenol | 7.87 | 7.41 | 0.46 |
| 2,6-Dinitrotoluene | 6.99 | 6.57 | 0.42 |
| 2,6-Lutidine | 4.94 | 4.15 | 0.79 |
| 2,6-Xylenol | 6.11 | 6.49 | -0.38 |
| 2,6-Xylidine | 5.54 | 6.2 | -0.66 |
| 2,7-Dichlorodibenzofuran | 8.27 | 8.34 | -0.07 |
| 2,7-Dichlorodibenzo-p-dioxin | 8.36 | 8.38 | -0.02 |
| 2,7-Dichloronaphthalene | 6.7 | 6.92 | -0.22 |
| 2,7-Dimethylnaphthalene | 6.14 | 6.18 | -0.04 |
| 2,8-Dichlorodibenzofuran | 8.36 | 8.34 | 0.02 |
| 2,8-Dichlorodibenzo-p-dioxin | 8.36 | 8.38 | -0.02 |
| 2.5-Dichloronitrobenzene | 6.27 | 5.94 | 0.33 |
| 2-Aminoanthraquinone | 11.49 | 11.32 | 0.17 |
| 2-Anisaldehyde | 5.94 | 5.32 | 0.62 |
| 2-Bromo-3,4,5-trichloroanisole | 6.35 | 6.57 | -0.22 |
| 2-Bromo-3,5-dichloroanisole | 5.82 | 5.97 | -0.15 |
| 2-Bromo-4,6-dichloroanisole | 5.48 | 5.97 | -0.49 |
| 2-Bromo-4-chloroanisole | 5.26 | 5.37 | -0.11 |
| 2-Bromo-6-chloroanisole | 4.96 | 5.37 | -0.41 |
| 2-Bromoanisole | 4.7 | 4.77 | -0.07 |
| 2-Bromodiphenyl ether | 7.24 | 7.11 | 0.13 |
| 2-Bromofluorene | 8.06 | 8.46 | -0.40 |
| 2-Bromopropane | 2.48 | 2.63 | -0.15 |
| 2-Bromotoluene | 4.56 | 4.66 | -0.10 |
| 2-Butanol | 3.85 | 3.95 | -0.10 |
| 2-Butanone | 2.79 | 2.83 | -0.04 |
| 2-Butylamine | 3.61 | 3.65 | -0.04 |
| 2-Chloro-2-methylbutane | 2.45 | 2.55 | -0.10 |
| 2-Chloro-2-methylpropane | 1.84 | 2.12 | -0.28 |
| 2-Chloro-4-nitroaniline | 7.82 | 7.4 | 0.42 |
| 2-Chloro-6-(trichloromethyl)pyridine | 6.21 | 6.13 | 0.08 |
| 2-Chloroaniline | 5.39 | 5.98 | -0.59 |
| 2-Chloroanisole | 5.1 | 4.44 | 0.66 |
| 2-Chloroanthracene | 8.47 | 8.72 | -0.25 |
| 2-Chlorobiphenyl | 6.43 | 6.74 | -0.31 |
| 2-Chlorobutane | 2.38 | 2.96 | -0.58 |
| 2-Chlorodibenzofuran | 7.67 | 7.74 | -0.07 |
| 2-Chlorodibenzo-p-dioxin | 7.56 | 7.78 | -0.22 |
| 2-Chlorodiphenyl ether | 6.42 | 6.78 | -0.36 |
| 2-Chloroethanol | 4.3 | 4.12 | 0.18 |
| 2-Chloronaphthalene | 5.76 | 6.32 | -0.56 |
| 2-Chloronitrobenzene | 5.2 | 5.34 | -0.14 |
| 2-Chlorophenol | 5.4 | 6.27 | -0.87 |
| 2-Chloropropane | 2.05 | 2.53 | -0.48 |
| 2-Chloropyridine | 4.37 | 4.36 | 0.01 |
| 2-Chlorotoluene | 4.11 | 4.33 | -0.22 |
| 2-Cresyl diphenyl phosphate | 10.7 | 10.39 | 0.31 |
| 2-Decanone | 5.48 | 5.41 | 0.07 |
| 2-Ethoxyethanol | 4.12 | 4.39 | -0.27 |
| 2-Ethoxyethylacetate | 4.43 | 4.03 | 0.40 |
| 2-Ethyl-1-hexanol | 5.58 | 5.63 | -0.05 |
| 2-Ethyl-3-methoxypyrazine | 4.92 | 5.4 | -0.48 |
| 2-Ethylaniline | 5.43 | 6.22 | -0.79 |
| 2-Ethylbutanoic acid | 5.72 | 5.94 | -0.22 |
| 2-Ethylhexanoic acid | 6.28 | 6.8 | -0.52 |
| 2-Ethylhexyl 2-(2,4-dichlorophenoxy)acetate | 9.12 | 9.29 | -0.17 |
| 2-Ethylhexyl 2-(4-chloro-2-methylphenoxy)acetate | 9.83 | 9.1 | 0.73 |
| 2-Ethylhexyl 2,3,4,5-tetrabromobenzoate | 10.43 | 11.4 | -0.97 |
| 2-Ethylhexyl acetate | 6.11 | 5.27 | 0.84 |
| 2-Ethylhexylamine | 5.19 | 5.41 | -0.22 |
| 2-Ethylnaphthalene | 6.12 | 6.2 | -0.08 |
| 2-Ethylpyridine | 4.76 | 4.5 | 0.26 |
| 2-Ethyltoluene | 4.23 | 4.3 | -0.07 |
| 2-Fluoroaniline | 4.66 | 5.2 | -0.54 |
| 2-Fluoroethanol | 1.98 | 2.64 | -0.66 |
| 2-Fluorophenol | 5.46 | 5.49 | -0.03 |
| 2-Heptanol | 5.1 | 5.24 | -0.14 |
| 2-Heptanone | 4.15 | 4.12 | 0.03 |
| 2-Heptenal | 4.55 | 4.36 | 0.19 |
| 2-Hexanol | 4.73 | 4.81 | -0.08 |
| 2'-Hydroxy-2,4-dibromodiphenylether | 9.23 | 10.39 | -1.16 |
| 2-Hydroxy-4-methoxybenzophenone | 9.06 | 8.58 | 0.48 |
| 2-Hydroxyacetophenone | 5.21 | 5.65 | -0.44 |
| 2-Hydroxyethylmethacrylate | 5.3 | 5.61 | -0.31 |
| 2-Iodophenol | 7.07 | 7.5 | -0.43 |
| 2-Isopropoxyethanol | 4.65 | 4.57 | 0.08 |
| 2-Isopropyl-5-methylphenol | 7.05 | 7.06 | -0.01 |
| 2-Isopropylaniline | 5.59 | 6.36 | -0.77 |
| 2-Isopropylnaphthalene | 6.21 | 6.31 | -0.10 |
| 2-Isopropyltoluene | 4.84 | 4.41 | 0.43 |
| 2'-Methoxy-2,3',4,5'-tetrabromodiphenylether | 10.57 | 10.42 | 0.15 |
| 2'-Methoxy-2,4,4'-tribromodiphenylether | 10.1 | 9.49 | 0.61 |
| 2-Methoxyacetophenone | 6.27 | 5.33 | 0.94 |
| 2-Methoxyaniline | 5.26 | 5.9 | -0.64 |
| 2-Methoxyethylamine | 3.81 | 3.87 | -0.06 |
| 2-Methoxynitrobenzene | 5.4 | 5.26 | 0.14 |
| 2-Methoxyphenol | 5.26 | 6.19 | -0.93 |
| 2-Methyl-1-butanol | 4.41 | 4.34 | 0.07 |
| 2-Methyl-1-propanol | 3.93 | 3.91 | 0.02 |
| 2-Methyl-2-butanol | 4.01 | 4.13 | -0.12 |
| 2-Methyl-2-propanol | 3.5 | 3.7 | -0.20 |
| 2-Methyl-3-butyn-2-ol | 3.89 | 3.99 | -0.10 |
| 2-Methylacrylonitrile | 2.6 | 2.73 | -0.13 |
| 2-Methylbenzaldehyde | 4.88 | 5.21 | -0.33 |
| 2-Methylbutyric acid | 5.24 | 5.51 | -0.27 |
| 2-Methylfuran | 2.43 | 2.85 | -0.42 |
| 2-Methylnaphthalene | 5.11 | 5.8 | -0.69 |
| 2-Methylpentane | 2.34 | 2.45 | -0.11 |
| 2-Methylpropane | 1.23 | 1.69 | -0.46 |
| 2-Methylpropanoic acid | 5.21 | 5.08 | 0.13 |
| 2-Methylpropenoic acid | 5.65 | 5.12 | 0.53 |
| 2-Methylpyrazine | 4.05 | 4.74 | -0.69 |
| 2-Methylquinoline | 6.99 | 6.37 | 0.62 |
| 2-Methylthiophene | 3.48 | 3.4 | 0.08 |
| 2-Naphthol | 8.47 | 8.07 | 0.40 |
| 2-Naphthylamine | 7.59 | 7.78 | -0.19 |
| 2-n-Hexoxyethanol | 5.76 | 6.11 | -0.35 |
| 2-Nitroaniline | 6.46 | 5.29 | 1.17 |
| 2-Nitrophenol | 5.05 | 5.58 | -0.53 |
| 2-Nitrotoluene | 4.87 | 5.15 | -0.28 |
| 2-Nonanone | 5.03 | 4.98 | 0.05 |
| 2-Nonenal | 4.41 | 5.22 | -0.81 |
| 2-Octanol | 5.67 | 5.67 | 0.00 |
| 2-Octanone | 4.44 | 4.55 | -0.11 |
| 2-Pentanol | 4.29 | 4.38 | -0.09 |
| 2-Phenoxyethanol | 5.86 | 6.16 | -0.30 |
| 2-Picoline | 4.3 | 4.07 | 0.23 |
| 2-Propanol | 3.41 | 3.52 | -0.11 |
| 2-Propynyl-(2E,4E)-3,7,11-trimethyl-2,4-dodecadienoate | 8.19 | 7.88 | 0.31 |
| 2-s-Butylphenol | 6.68 | 7.08 | -0.40 |
| 2-Tolunitrile | 4.69 | 4.94 | -0.25 |
| 2-Undecanone | 5.73 | 5.84 | -0.11 |
| 3,3,4,4,5,5,6,6,6-Nonafluorohexan-1-ol | 4.54 | 4.47 | 0.07 |
| 3,3,4,4,5,5,6,6,7,7,8,8,8-Tridecafluorooctan-1-ol | 5.26 | 4.93 | 0.33 |
| 3,3,4,4,5,5,6,6,7,7,8,8,8-Tridecafluorooctyl prop-2-enoate | 4.67 | 4.79 | -0.12 |
| 3,3,4,4,5,5,6,6,7,7,8,8,9,9,10,10,10-Heptadecafluorodecan-1-ol | 5.56 | 5.39 | 0.17 |
| 3,3,4,4,5,5,6,6,7,7,8,8,9,9,10,10,10-Heptadecafluorodecyl prop-2-enoate | 5.34 | 5.25 | 0.09 |
| 3,3,4,4,5,5,6,6,7,7,8,8,9,9,10,10,11,11,12,12,12-Henicosafluorododecan-1-ol | 5.71 | 5.85 | -0.14 |
| 3,3,4,4,5,5,6,6,7,7,8,8,9,9,10,10,11,11,12,12,12-Henicosafluorododecyl prop-2-enoate | 5.68 | 5.71 | -0.03 |
| 3,3,4,4,5,5,6,6,7,7,8,8,9,9,10,10,11,11,12,12,13,13,14,14,14-Pentacosafluorotetradecan-1-ol | 6.16 | 6.31 | -0.15 |
| 3,3',4,4',5,5'-Hexachlorobiphenyl | 11.02 | 9.74 | 1.28 |
| 3,3',4,4',5-Pentabromodiphenyl ether | 12 | 10.83 | 1.17 |
| 3,3',4,4',5-Pentachlorobiphenyl | 10.31 | 9.14 | 1.17 |
| 3,3',4,4',5-Pentachlorodiphenyl ether | 8.74 | 9.18 | -0.44 |
| 3,3',4,4'-Tetrabromodiphenyl ether | 10.7 | 9.9 | 0.80 |
| 3,3',4,4'-Tetrachlorobiphenyl | 9.29 | 8.54 | 0.75 |
| 3,3',4,4'-Tetrachlorodiphenyl ether | 8.7 | 8.58 | 0.12 |
| 3,3',4-Tribromodiphenyl ether | 9.61 | 8.97 | 0.64 |
| 3,3',4-Trichlorodiphenylether | 8.69 | 7.98 | 0.71 |
| 3,3',5,5'-Tetrachlorobiphenyl | 7.7 | 8.54 | -0.84 |
| 3,3',5-Trichlorobiphenyl | 8.21 | 7.94 | 0.27 |
| 3,3,5-Trimethylcyclohexyl salicylate | 8.56 | 8.34 | 0.22 |
| 3,3'-Dichlorobiphenyl | 7.66 | 7.34 | 0.32 |
| 3,4,4',5-Tetrachlorobiphenyl | 9.67 | 8.54 | 1.13 |
| 3,4,4'-Tribromodiphenyl ether | 9.68 | 8.97 | 0.71 |
| 3,4,4'-Trichlorobiphenyl | 8.64 | 7.94 | 0.70 |
| 3,4,4'-Trichlorodiphenylether | 8.71 | 7.98 | 0.73 |
| 3,4,5,6-Tetrachloroguaiacol | 8.02 | 8.59 | -0.57 |
| 3,4,5-Trichloroanisole | 5.58 | 5.64 | -0.06 |
| 3,4,5-Trichlorocatechol | 9.36 | 9.82 | -0.46 |
| 3,4',5-Trichlorodiphenylether | 8.51 | 7.98 | 0.53 |
| 3,4,5-Trichloroguaiacol | 8.02 | 7.99 | 0.03 |
| 3,4,5-Trichloroveratrole | 6.84 | 6.16 | 0.68 |
| 3,4'-Dibromodiphenyl ether | 8.57 | 8.04 | 0.53 |
| 3,4-Dibromodiphenyl ether | 8.55 | 8.04 | 0.51 |
| 3,4-Dichloro-1-butene | 3.52 | 3.53 | -0.01 |
| 3,4-Dichloroaniline | 7.05 | 6.58 | 0.47 |
| 3,4-Dichloroanisole | 5.11 | 5.04 | 0.07 |
| 3,4'-Dichlorobiphenyl | 7.47 | 7.34 | 0.13 |
| 3,4-Dichlorobiphenyl | 7.57 | 7.34 | 0.23 |
| 3,4'-Dichlorodiphenylether | 7.75 | 7.38 | 0.37 |
| 3,4-Dichlorodiphenylether | 7.54 | 7.38 | 0.16 |
| 3,4-Dichlorofluoranthene | 10.48 | 10.7 | -0.22 |
| 3,4-Dichloronitrobenzene | 6.53 | 5.94 | 0.59 |
| 3,4-Dichlorotoluene | 5 | 4.93 | 0.07 |
| 3,4-Dihydro-4H-pyran | 2.07 | 2.74 | -0.67 |
| 3,4-Dimethylphenyl N-methylcarbamate | 7.29 | 8.03 | -0.74 |
| 3,4-Lutidine | 5.38 | 4.81 | 0.57 |
| 3,4-Xylenol | 6.85 | 6.49 | 0.36 |
| 3,4-Xylidine | 5.85 | 6.2 | -0.35 |
| 3,5,5-Trimethyl-1-hexanol | 5.52 | 5.36 | 0.16 |
| 3,5,5-Trimethyl-2-cyclohexenone | 5.15 | 4.84 | 0.31 |
| 3,5-Dibromo-4-hydroxybenzonitrile | 8.99 | 8.74 | 0.25 |
| 3,5-Dichloroanisole | 4.83 | 5.04 | -0.21 |
| 3,5-Dichlorobiphenyl | 7.52 | 7.34 | 0.18 |
| 3,5-Dichlorodiphenylether | 7.57 | 7.38 | 0.19 |
| 3,5-Lutidine | 5.22 | 4.81 | 0.41 |
| 3,5-Xylenol | 6.81 | 6.49 | 0.32 |
| 3,6-Dichlorodibenzofuran | 8.33 | 8.34 | -0.01 |
| 3,6-Dichloropicolinic acid | 9.14 | 8.23 | 0.91 |
| 3,8-Dichlorofluoranthene | 10.32 | 10.7 | -0.38 |
| 3,9,10-Trichlorophenanthrene | 9.98 | 9.92 | 0.06 |
| 3,9-Dichlorophenanthrene | 9.24 | 9.32 | -0.08 |
| 3-Acetylpyridine | 6.22 | 5.48 | 0.74 |
| 3-Aminophenylsulfur pentafluoride | 7 | 6.8 | 0.20 |
| 3-Anisaldehyde | 5.64 | 5.32 | 0.32 |
| 3-Bromo-2,4,6-trichloroanisole | 6.06 | 6.57 | -0.51 |
| 3-Bromo-2,4-dichloroanisole | 5.54 | 5.97 | -0.43 |
| 3-Bromo-2,5,6-trichloroanisole | 6.07 | 6.57 | -0.50 |
| 3-Bromo-2,6-dichloroanisole | 5.7 | 5.97 | -0.27 |
| 3-Bromoanisole | 4.43 | 4.77 | -0.34 |
| 3-Bromodiphenyl ether | 7.36 | 7.11 | 0.25 |
| 3-Bromonitrobenzene | 6.65 | 5.67 | 0.98 |
| 3-Bromopyridine | 4.81 | 4.92 | -0.11 |
| 3-Bromotoluene | 4.03 | 4.66 | -0.63 |
| 3-Buten-2-one | 2.95 | 2.62 | 0.33 |
| 3-Carene | 3.8 | 4.41 | -0.61 |
| 3-Chloro-1-propanol | 4.81 | 4.55 | 0.26 |
| 3-Chloro-2-methylpropene | 2.46 | 2.71 | -0.25 |
| 3-Chloro-4-methylaniline | 6.42 | 6.39 | 0.03 |
| 3-Chloroaniline | 6.01 | 5.98 | 0.03 |
| 3-Chloroanisole | 4.92 | 4.44 | 0.48 |
| 3-Chlorobiphenyl | 6.78 | 6.74 | 0.04 |
| 3-Chlorodibenzofuran | 7.67 | 7.74 | -0.07 |
| 3-Chlorofluoranthene | 9.54 | 10.1 | -0.56 |
| 3-Chloronitrobenzene | 5.64 | 5.34 | 0.30 |
| 3-Chlorophenol | 7.21 | 6.27 | 0.94 |
| 3-Chloropyridine | 4.17 | 4.59 | -0.42 |
| 3-Chlorotoluene | 4.15 | 4.33 | -0.18 |
| 3-Ethylphenol | 6.86 | 6.51 | 0.35 |
| 3-Ethylpyridine | 4.92 | 4.83 | 0.09 |
| 3-Heptanol | 5.08 | 5.24 | -0.16 |
| 3-Hexanol | 4.54 | 4.81 | -0.27 |
| 3-Hydroxy-2,2',4,4',5,6'-hexabromodiphenylether | 12.78 | 14.11 | -1.33 |
| 3-Hydroxy-2,2',4,4'-tetrabromodiphenylether | 11.12 | 12.25 | -1.13 |
| 3'-Hydroxy-2,4,4'-tribromodiphenylether | 10.29 | 11.32 | -1.03 |
| 3'-Hydroxy-2,4-dibromodiphenylether | 9.96 | 10.39 | -0.43 |
| 3-Hydroxybenzaldehyde | 8.02 | 7.15 | 0.87 |
| 3-Isopropylbiphenyl | 6.69 | 6.67 | 0.02 |
| 3-Isopropyltoluene | 5.17 | 4.41 | 0.76 |
| 3-Methoxy-2,2',4,4',5,6'-hexabromodiphenylether | 12.1 | 12.28 | -0.18 |
| 3-Methoxy-2,2',4,4'-tetrabromodiphenylether | 10.77 | 10.42 | 0.35 |
| 3-Methoxy-4-hydroxybenzaldehyde | 7.37 | 7.67 | -0.30 |
| 3-Methoxyacetophenone | 6.33 | 5.33 | 1.00 |
| 3-Methoxyphenol | 6.76 | 6.19 | 0.57 |
| 3-Methyl-2-butanol | 4.3 | 4.09 | 0.21 |
| 3-Methyl-2-butanone | 3.04 | 2.97 | 0.07 |
| 3-Methyl-2-nitrophenol | 5.98 | 5.99 | -0.01 |
| 3-Methyl-4-nitrophenol | 8.29 | 7.5 | 0.79 |
| 3-Methylbutanoic acid | 5.46 | 5.51 | -0.05 |
| 3-Methylbutyl nitrate | 3.9 | 4.01 | -0.11 |
| 3-Methylpentane | 1.93 | 2.45 | -0.52 |
| 3-Methylpyridine | 4.57 | 4.4 | 0.17 |
| 3-Methylstyrene | 4.3 | 4.09 | 0.21 |
| 3-Methylthiophene | 3.01 | 3.19 | -0.18 |
| 3-Nitroaniline | 7.62 | 6.8 | 0.82 |
| 3-Nitrotoluene | 5.19 | 5.15 | 0.04 |
| 3-Pentanol | 4.28 | 4.38 | -0.10 |
| 3-Propyltoluene | 5.09 | 4.7 | 0.39 |
| 3-Pyridinecarbonitrile | 5.08 | 5.2 | -0.12 |
| 3-Pyridinecarboxaldehyde | 5.26 | 5.47 | -0.21 |
| 3-t-Butylphenol | 7.32 | 6.67 | 0.65 |
| 3-Trifluoromethylaniline | 5.19 | 5.8 | -0.61 |
| 4-(2,4-Dichlorophenoxy)butyric acid | 10.18 | 9.39 | 0.79 |
| 4,4'-Bipyridine | 7.78 | 7.48 | 0.30 |
| 4,4'-Dibromobiphenyl | 8.5 | 8 | 0.50 |
| 4,4'-Dibromodiphenyl ether | 8.64 | 8.04 | 0.60 |
| 4,4'-Dichlorobiphenyl | 7.63 | 7.34 | 0.29 |
| 4,5,6-Trichloroguaiacol | 6.66 | 7.99 | -1.33 |
| 4,5-Dichloroguaiacol | 6.94 | 7.39 | -0.45 |
| 4,6,6,7,8,8-Hexamethyl-1,3,4,7-tetrahydrocyclopenta[g]isochromene | 8.15 | 8.06 | 0.09 |
| 4,6-Dinitro-o-cresol | 6.89 | 7.41 | -0.52 |
| 4,7-Dibromobenz[a]anthracene | 12.78 | 12.38 | 0.40 |
| 4-Acetylanisole | 6.26 | 5.33 | 0.93 |
| 4-Acetylpyridine | 5.82 | 5.48 | 0.34 |
| 4-Allyl-2-methoxyphenol | 6.48 | 7.25 | -0.77 |
| 4-Amino-3,5,6-trichloro-2-pyridinecarboxlic acid | 11.5 | 10.89 | 0.61 |
| 4-Aminophenylsulfur pentafluoride | 7.01 | 6.8 | 0.21 |
| 4-Bromo-2,3,5,6-tetrachloroanisole | 6.61 | 7.17 | -0.56 |
| 4-Bromo-2,3,6-trichloroanisole | 6.07 | 6.57 | -0.50 |
| 4-bromo-2,3-Dichloroanisole | 5.9 | 5.97 | -0.07 |
| 4-Bromo-2,6-dichloroanisole | 5.49 | 5.97 | -0.48 |
| 4-Bromo-2-chloroanisole | 5.26 | 5.37 | -0.11 |
| 4-Bromo-3,5-dichloroanisole | 5.82 | 5.97 | -0.15 |
| 4-Bromoanisole | 4.48 | 4.77 | -0.29 |
| 4-Bromobiphenyl | 7.22 | 7.07 | 0.15 |
| 4-Bromoiodobenzene | 5.87 | 6.08 | -0.21 |
| 4-Bromophenol | 7.67 | 6.6 | 1.07 |
| 4-Bromotoluene | 4.39 | 4.66 | -0.27 |
| 4-Carboxyphenol | 10.03 | 9.27 | 0.76 |
| 4-Chloro-2-methylphenol | 7.02 | 6.68 | 0.34 |
| 4-Chloro-2-nitrophenol | 5.67 | 6.18 | -0.51 |
| 4-Chloro-6-nitro-m-cresol | 5.58 | 6.59 | -1.01 |
| 4-Chloroaniline | 6.02 | 5.98 | 0.04 |
| 4-Chloroanisole | 4.97 | 4.44 | 0.53 |
| 4-Chlorobiphenyl | 6.77 | 6.74 | 0.03 |
| 4-Chlorodiphenyl ether | 6.84 | 6.78 | 0.06 |
| 4-Chloroiodobenzene | 5.34 | 5.75 | -0.41 |
| 4-Chloro-m-cresol | 7.95 | 6.68 | 1.27 |
| 4-Chloronitrobenzene | 5.24 | 5.34 | -0.10 |
| 4-Chlorophenol | 7.39 | 6.27 | 1.12 |
| 4-Chlorotoluene | 4.15 | 4.33 | -0.18 |
| 4-Cyanopyridine | 4.68 | 5.2 | -0.52 |
| 4-Ethylaniline | 5.64 | 6.22 | -0.58 |
| 4-Ethylphenol | 6.84 | 6.51 | 0.33 |
| 4-Ethylpyridine | 5 | 4.83 | 0.17 |
| 4-Ethyltoluene | 4.28 | 4.3 | -0.02 |
| 4-Fluoroaniline | 4.77 | 5.2 | -0.43 |
| 4-Fluoroiodobenzene | 4.63 | 4.97 | -0.34 |
| 4-Fluorophenol | 6.16 | 5.49 | 0.67 |
| 4-Heptanol | 5.08 | 5.24 | -0.16 |
| 4-Heptanone | 4.13 | 4.12 | 0.01 |
| 4-Hydroxy-2,2',3,4',5-pentabromodiphenylether | 12.01 | 13.18 | -1.17 |
| 4-Hydroxy-2,2',3,4'-tetrabromodiphenylether | 10.95 | 12.25 | -1.30 |
| 4'-Hydroxy-2,2',4,5'-tetrabromodiphenylether | 11 | 12.25 | -1.25 |
| 4-Hydroxyazobenzene | 10.51 | 10.83 | -0.32 |
| 4-Iodophenol | 8.09 | 7.5 | 0.59 |
| 4-Isopropylbiphenyl | 6.77 | 6.67 | 0.10 |
| 4-Methoxy-2,2',3,4',5-pentabromodiphenylether | 11.62 | 11.35 | 0.27 |
| 4-Methoxy-2-nitrophenol | 5.85 | 6.1 | -0.25 |
| 4-Methoxy-4-methyl-2-pentanone | 4.4 | 3.94 | 0.46 |
| 4-Methoxyaniline | 6.22 | 5.9 | 0.32 |
| 4-Methoxybenzaldehyde | 6.22 | 5.32 | 0.90 |
| 4-Methyl-1-pentanol | 4.52 | 4.77 | -0.25 |
| 4-Methyl-1-pentene | 2.1 | 2.36 | -0.26 |
| 4-Methyl-2-nitrophenol | 5.34 | 5.99 | -0.65 |
| 4-Methylacetophenone | 5.45 | 5.22 | 0.23 |
| 4-Methylbenzaldehyde | 5 | 5.21 | -0.21 |
| 4-Methylcyclohexanone | 4.52 | 4.39 | 0.13 |
| 4-Methylpyridine | 4.7 | 4.4 | 0.30 |
| 4-Nitroanisole | 6 | 5.26 | 0.74 |
| 4-Nitrooxy-1-butanol | 6.91 | 5.89 | 1.02 |
| 4-Nitrooxy-2-butanol | 6.23 | 5.64 | 0.59 |
| 4-Nitrophenylsulfur pentafluoride | 5.77 | 6.16 | -0.39 |
| 4-Nitrotoluene | 4.88 | 5.15 | -0.27 |
| 4-Nonylphenol | 9.73 | 9.52 | 0.21 |
| 4-Octanol | 5.37 | 5.67 | -0.30 |
| 4-Phenylcyclohexene | 5.66 | 5.72 | -0.06 |
| 4-Propylphenol | 7.22 | 6.94 | 0.28 |
| 4-Pyridinecarboxaldehyde | 5.34 | 5.47 | -0.13 |
| 4-s-Butyl-2-nitrophenol | 6.15 | 6.99 | -0.84 |
| 4-t-Butylphenol | 7.53 | 6.67 | 0.86 |
| 4-t-Butyltoluene | 4.39 | 4.4 | -0.01 |
| 4-t-Octylphenol | 8.6 | 7.69 | 0.91 |
| 4-Vinylcyclohexene | 3.79 | 3.65 | 0.14 |
| 4-Vinylpyridine | 4.67 | 4.62 | 0.05 |
| 5,7-Dibromobenz[a]anthracene | 12.83 | 12.38 | 0.45 |
| 5-Amino-1H-1,2,4-triazole | 8.09 | 7.83 | 0.26 |
| 5-Bromo-2,4-dichloroanisole | 5.9 | 5.97 | -0.07 |
| 5-Ethylidene-2-norbornene | 4.23 | 4.75 | -0.52 |
| 5-Fluoro-2-nitrophenol | 4.77 | 5.4 | -0.63 |
| 5-Isopropyl-2-methylphenol | 7.2 | 7.06 | 0.14 |
| 5-Methyl-2-furaldehyde | 4.56 | 4.59 | -0.03 |
| 5-Methyl-2-nitrophenol | 5.35 | 5.99 | -0.64 |
| 5-Nitrooxy-2-pentanol | 6.53 | 6.07 | 0.46 |
| 5-Nonanone | 4.8 | 4.98 | -0.18 |
| 6,12-Dichlorochrysene | 12.08 | 11.72 | 0.36 |
| 6-Bromo-2,3,4-trichloroanisole | 6.05 | 6.57 | -0.52 |
| 6-Bromo-2,3-dichloroanisole | 5.9 | 5.97 | -0.07 |
| 6-Bromobenzo[a]pyrene | 12.95 | 13.23 | -0.28 |
| 6-Chlorobenzo[a]pyrene | 12.76 | 12.9 | -0.14 |
| 6-Chlorochrysene | 11.3 | 11.12 | 0.18 |
| 6-Hydroxy-2,2',3,3',4'-pentabromodiphenylether | 12.42 | 13.18 | -0.76 |
| 6-Hydroxy-2,2',3,4,4'-pentabromodiphenylether | 11.95 | 13.18 | -1.23 |
| 6-Hydroxy-2,2',3,4,5'-pentabromodiphenylether | 12.03 | 13.18 | -1.15 |
| 6'-Hydroxy-2,2',4,4',5'-pentabromodiphenylether | 12.23 | 13.18 | -0.95 |
| 6-Hydroxy-2,3,3',4,4',5'-hexabromodiphenylether | 13.29 | 14.11 | -0.82 |
| 6-Methoxy-2,2',3,3',4-pentabromodiphenylether | 11.98 | 11.35 | 0.63 |
| 6-Methoxy-2,2',3,4,5'-pentabromodiphenylether | 11.52 | 11.35 | 0.17 |
| 6'-Methoxy-2,2',4,4',5-pentabromodiphenylether | 11.36 | 11.35 | 0.01 |
| 6-Methoxy-2,2',4,4'-tetrabromodiphenylether | 10.77 | 10.42 | 0.35 |
| 6-Methoxy-2,3,3',4,4',5-hexabromodiphenylether | 12.89 | 12.28 | 0.61 |
| 7,11-Dibromobenz[a]anthracene | 12.62 | 12.38 | 0.24 |
| 7,12-Dibromobenz[a]anthracene | 12.66 | 12.38 | 0.28 |
| 7,12-Dichlorobenz[a]anthracene | 12.05 | 11.72 | 0.33 |
| 7-Bromobenz[a]anthracene | 11.73 | 11.45 | 0.28 |
| 7-Chlorobenz[a]anthracene | 11.34 | 11.12 | 0.22 |
| 8-Chlorofluoranthene | 9.58 | 10.1 | -0.52 |
| 9,10-Anthraquinone | 8.28 | 9.26 | -0.98 |
| 9,10-Dibromoanthracene | 10.05 | 9.98 | 0.07 |
| 9,10-Dichlorophenanthrene | 9.3 | 9.32 | -0.02 |
| 9,10-Dihydrophenanthrene | 7.03 | 7.43 | -0.40 |
| 9-Bromoanthracene | 8.94 | 9.05 | -0.11 |
| 9-Bromophenanthrene | 8.87 | 9.05 | -0.18 |
| 9-Chloroanthracene | 8.47 | 8.72 | -0.25 |
| 9-Chlorophenanthrene | 8.41 | 8.72 | -0.31 |
| 9H-Fluoren-9-one | 7.93 | 8.18 | -0.25 |
| Abate | 11.56 | 12.26 | -0.70 |
| Acenaphthene | 6.52 | 7.07 | -0.55 |
| Acenaphthylene | 6.34 | 7 | -0.66 |
| Acetaldehyde | 2.23 | 2.39 | -0.16 |
| Acetamide | 5.38 | 5.05 | 0.33 |
| Acetic acid | 4.31 | 4.51 | -0.20 |
| Acetochlor | 8.62 | 8.16 | 0.46 |
| Acetonitrile | 2.31 | 2.12 | 0.19 |
| Acetophenone | 4.45 | 4.81 | -0.36 |
| Acetylacetone (enol form) | 4.06 | 3.84 | 0.22 |
| Aclonifen | 9.96 | 8.75 | 1.21 |
| Acrylic acid | 5.01 | 4.73 | 0.28 |
| Acticin | 12.19 | 11.34 | 0.85 |
| Adiponitrile | 5.64 | 4.64 | 1.00 |
| Alachlor | 9.31 | 8.29 | 1.02 |
| Aldicarb | 8.32 | 8.05 | 0.27 |
| Aldrin | 8.07 | 8.36 | -0.29 |
| all-trans-1,5,9-Cyclododecatriene | 5.43 | 5.39 | 0.04 |
| Allyl acetate | 3.03 | 3.2 | -0.17 |
| Allyl alcohol | 3.66 | 3.56 | 0.10 |
| Allyl bromide | 2.42 | 2.66 | -0.24 |
| Allyl chloride | 1.67 | 2.32 | -0.65 |
| Allyl cyanide | 2.95 | 2.77 | 0.18 |
| Allyl glycidyl ether | 3.99 | 3.63 | 0.36 |
| Allyl methacrylate | 4.12 | 3.81 | 0.31 |
| Allylamine | 3.28 | 3.34 | -0.06 |
| alpha-Hexachlorocyclohexane | 7.62 | 8.06 | -0.44 |
| alpha-Methylstyrene | 4.44 | 4.07 | 0.37 |
| alpha-Phellandrene | 4.41 | 4.37 | 0.04 |
| alpha-Pinene | 3.75 | 4.41 | -0.66 |
| alpha-Terpinene | 3.9 | 4.62 | -0.72 |
| alpha-Terpineol | 6.73 | 6.44 | 0.29 |
| Altosid | 9.2 | 8.31 | 0.89 |
| Ambrette musk | 8.11 | 8.09 | 0.02 |
| Ametryn | 9.52 | 9.77 | -0.25 |
| Amicarbazone | 11.04 | 11.12 | -0.08 |
| Aminocarb | 8.52 | 9.11 | -0.59 |
| Amyl acetate | 4.12 | 4.27 | -0.15 |
| Amyl propionate | 4.21 | 4.7 | -0.49 |
| Amylamine | 4.39 | 4.41 | -0.02 |
| Amylbenzene | 5.26 | 5.12 | 0.14 |
| Ancymidol | 11.35 | 11.04 | 0.31 |
| Aniline | 4.48 | 5.38 | -0.90 |
| Anisole | 4.01 | 3.84 | 0.17 |
| Anthracene | 7.71 | 7.7 | 0.01 |
| Antor | 9.74 | 10.07 | -0.33 |
| Arachic alcohol | 12.06 | 11.08 | 0.98 |
| Aspirin | 8.19 | 7.11 | 1.08 |
| Atratone | 9.87 | 9.17 | 0.70 |
| Atrazine | 9.08 | 8.89 | 0.19 |
| Azaconazole | 10.15 | 9.86 | 0.29 |
| Azamethiphos | 9.58 | 9.95 | -0.37 |
| Azoxystrobin | 13.13 | 13.04 | 0.09 |
| Bayleton | 10.98 | 10.66 | 0.32 |
| Beflubutamid | 11.49 | 11.57 | -0.08 |
| Benazolin | 10.99 | 10.42 | 0.57 |
| Benazolin-ethyl | 8.42 | 8.89 | -0.47 |
| Benomyl | 11.48 | 11.09 | 0.39 |
| Benoxacor | 7.85 | 7.93 | -0.08 |
| Benz[a]anthracene | 10.28 | 9.98 | 0.30 |
| Benz[e]acephenanthrylene | 11.34 | 11.3 | 0.04 |
| Benzalchloride | 5.01 | 4.98 | 0.03 |
| Benzaldehyde | 4.41 | 4.8 | -0.39 |
| Benzamide | 8.31 | 7.46 | 0.85 |
| Benzene | 2.8 | 3.14 | -0.34 |
| Benzo[a]phenanthrene | 9.85 | 9.98 | -0.13 |
| Benzo[a]pyrene | 11.56 | 11.7 | -0.14 |
| Benzo[b]fluorene | 9.42 | 9.42 | 0.00 |
| Benzo[b]triphenylene | 12.11 | 12.26 | -0.15 |
| Benzo[e]pyrene | 10.72 | 11.7 | -0.98 |
| Benzo[f]quinoline | 8.43 | 8.69 | -0.26 |
| Benzo[g,h,i]perylene | 12.55 | 13.42 | -0.87 |
| Benzo[k]fluoranthene | 11.37 | 11.3 | 0.07 |
| Benzoic acid | 7.23 | 6.92 | 0.31 |
| Benzonitrile | 4.46 | 4.53 | -0.07 |
| Benzophosphate | 9.91 | 9.95 | -0.04 |
| Benzotrifluoride | 3.24 | 3.74 | -0.50 |
| Benzoximate | 9.27 | 9.25 | 0.02 |
| Benzyl acetate | 5.2 | 5.39 | -0.19 |
| Benzyl benzoate | 7.94 | 7.8 | 0.14 |
| Benzyl butyl phthalate | 9.66 | 10.73 | -1.07 |
| Benzyl methyl ether | 4.29 | 4.48 | -0.19 |
| beta-Citronellol | 6.51 | 6.27 | 0.24 |
| beta-HCH | 8.74 | 8.06 | 0.68 |
| beta-Ionone | 6.19 | 6.23 | -0.04 |
| beta-Phellandrene | 4.42 | 4.23 | 0.19 |
| Bifenazate | 10.88 | 10.59 | 0.29 |
| Bifenox | 11.7 | 10.57 | 1.13 |
| Bioallethrin | 9.94 | 9.81 | 0.13 |
| Biphenyl | 5.88 | 5.78 | 0.10 |
| Bis(2-chloroethyl) ether | 3.5 | 3.93 | -0.43 |
| Bitertanol | 14.23 | 13.98 | 0.25 |
| Borneol | 5.69 | 5.96 | -0.27 |
| Bromacil | 10.02 | 9.92 | 0.10 |
| Bromoacetic acid | 6.69 | 5.63 | 1.06 |
| Bromobenzene | 4.08 | 4.25 | -0.17 |
| Bromobutide | 9.01 | 9.85 | -0.84 |
| Bromocyclohexane | 3.67 | 4.26 | -0.59 |
| Bromoethane | 2.11 | 2.44 | -0.33 |
| Bromofenoxim | 13.26 | 13.94 | -0.68 |
| Bromophos | 7.18 | 8.08 | -0.90 |
| Bromophos-ethyl | 9.22 | 8.68 | 0.54 |
| Bromoxynil butyrate | 8.62 | 8.95 | -0.33 |
| Bromoxynil heptanoate | 9.3 | 10.24 | -0.94 |
| Bromoxynil octanoate | 10.26 | 10.67 | -0.41 |
| Bromuconazole | 11.07 | 10.37 | 0.70 |
| Butachlor | 10.12 | 9.1 | 1.02 |
| Butamifos | 9.52 | 9.59 | -0.07 |
| Butanal | 3.39 | 3.25 | 0.14 |
| Butanamide | 6.39 | 5.91 | 0.48 |
| Butane | 1.53 | 1.98 | -0.45 |
| Butanedioic acid | 9.54 | 9.76 | -0.22 |
| Butanoic acid | 5.3 | 5.37 | -0.07 |
| Butenachlor | 8.79 | 9.27 | -0.48 |
| Butocarboxim | 8.23 | 7.98 | 0.25 |
| Butralin | 8.18 | 8.68 | -0.50 |
| Buturon | 10.27 | 9.95 | 0.32 |
| Butyl 4-hydroxybenzoate | 9.63 | 8.6 | 1.03 |
| Butylate | 6.64 | 6.91 | -0.27 |
| Butylbenzene | 4.34 | 4.72 | -0.38 |
| Butylcellosolve | 4.84 | 5.25 | -0.41 |
| Butylmethylketone | 3.68 | 3.69 | -0.01 |
| Butylnitrate | 3.34 | 3.87 | -0.53 |
| Butyric acid methylester | 3.29 | 3.54 | -0.25 |
| Butyronitrile | 3.12 | 2.98 | 0.14 |
| Cafenstrole | 12.22 | 11.97 | 0.25 |
| Camphene | 4.04 | 4.27 | -0.23 |
| Camphor | 5.21 | 5.06 | 0.15 |
| Capraldehyde | 5.32 | 5.83 | -0.51 |
| Caproic aldehyde | 4.41 | 4.11 | 0.30 |
| Caprylene | 3.35 | 3.45 | -0.10 |
| Caprylic aldehyde | 5.36 | 4.97 | 0.39 |
| Carbaril | 9.55 | 9.61 | -0.06 |
| Carbazole | 8.03 | 8.3 | -0.27 |
| Carbendazim | 9.83 | 10.32 | -0.49 |
| Carbofuran | 9.24 | 9.15 | 0.09 |
| Carbophenothion | 10.15 | 9.85 | 0.30 |
| Carbophos | 7.83 | 8.52 | -0.69 |
| Carvone | 5.72 | 5.43 | 0.29 |
| Cashmeran | 6.43 | 6.74 | -0.31 |
| Celestolide | 7.58 | 8 | -0.42 |
| CGA307771 | 12.4 | 12.45 | -0.05 |
| Chloral | 3.44 | 4.08 | -0.64 |
| Chloral hydrate | 7.65 | 7.55 | 0.10 |
| Chlordane | 8.92 | 8.82 | 0.10 |
| Chlordimeform | 7.22 | 6.58 | 0.64 |
| Chlorfenidim | 9.01 | 9.14 | -0.13 |
| Chlorimuron-ethyl | 13.95 | 14.57 | -0.62 |
| Chlormethine | 4.29 | 4.68 | -0.39 |
| Chloroacetic acid | 6.34 | 5.29 | 1.05 |
| Chloroacetic acid ethylester | 3.62 | 3.76 | -0.14 |
| Chloroacetonitrile | 3.19 | 2.9 | 0.29 |
| Chlorobenzene | 3.58 | 3.92 | -0.34 |
| Chlorobenzilate | 10.44 | 11.38 | -0.94 |
| Chloroethane | 1.78 | 2.1 | -0.32 |
| Chloroethylene | 0.9 | 1.71 | -0.81 |
| Chlorophthalim | 9.26 | 9.62 | -0.36 |
| Chloropropham | 7.94 | 7.89 | 0.05 |
| Chlorothalonil | 8.11 | 8.14 | -0.03 |
| Chloroxifenidim | 11.49 | 12 | -0.51 |
| Chlorpyrifos-methyl | 7.97 | 7.9 | 0.07 |
| Chlorpyriphos | 8.41 | 8.5 | -0.09 |
| Chlorsulfuron | 12.84 | 13.08 | -0.24 |
| Chlorthion | 8.55 | 7.97 | 0.58 |
| Chlortoluron | 9.92 | 9.55 | 0.37 |
| Chlozolinate | 9.04 | 9.24 | -0.20 |
| Ciafos | 6.96 | 7.16 | -0.20 |
| Cimetacarb | 11.24 | 11.09 | 0.15 |
| Cinmethylin | 9.12 | 8.4 | 0.72 |
| cis-1,1,1,4,4,4-Hexafluoro-2-butene | 1.55 | 2.02 | -0.47 |
| cis-1,2-Cyclohexyl dinitrate | 6.4 | 6.26 | 0.14 |
| cis-1,2-Dichloroethylene | 2.6 | 2.34 | 0.26 |
| cis-1,3-Cyclohexyl dinitrate | 6.49 | 6.26 | 0.23 |
| cis-1,3-Dichloropropene | 2.68 | 2.45 | 0.23 |
| cis-1,4-Dichloro-2-butene | 4.04 | 3.56 | 0.48 |
| cis-2,4-Pentyl dinitrate | 5.43 | 5.49 | -0.06 |
| cis-2,5-Dimethyltetrahydrofuran | 3.28 | 3.18 | 0.10 |
| cis-2-Butene | 1.43 | 1.88 | -0.45 |
| cis-Nonachlor | 9.66 | 9.6 | 0.06 |
| Clodinafop-propargyl | 10.69 | 9.93 | 0.76 |
| Clofenotane | 9.88 | 9.6 | 0.28 |
| Clofenvinfos | 9.78 | 9.42 | 0.36 |
| Cloquintocet-mexyl | 10.93 | 11.27 | -0.34 |
| Codlelure | 7.28 | 7.28 | 0.00 |
| Colamine | 6.32 | 5.14 | 1.18 |
| Coronene | 14.69 | 15.14 | -0.45 |
| Coumaphos | 9.5 | 10.15 | -0.65 |
| Coumarin | 6.59 | 6.25 | 0.34 |
| Coumatetralyl | 13.34 | 13.4 | -0.06 |
| Crotonic acid | 5.28 | 5.19 | 0.09 |
| Crotoxyphos | 9.55 | 9.29 | 0.26 |
| Cryofluorane | 1.29 | 1.42 | -0.13 |
| Cumene | 3.98 | 4.03 | -0.05 |
| Cumyluron | 13.22 | 13.5 | -0.28 |
| Cyanazine | 9.93 | 9.64 | 0.29 |
| Cyanoethylene | 2.28 | 2.34 | -0.06 |
| Cycloate | 7.36 | 7.5 | -0.14 |
| Cyclododecanol | 7.62 | 7.07 | 0.55 |
| Cycloheptane | 3.49 | 3.35 | 0.14 |
| Cyclohexane | 2.71 | 3.08 | -0.37 |
| Cyclohexanol | 5.18 | 5.15 | 0.03 |
| Cyclohexanone | 3.99 | 4.25 | -0.26 |
| Cyclohexene | 2.83 | 3.35 | -0.52 |
| Cyclohexylamine | 5.13 | 4.85 | 0.28 |
| Cyclooctane | 3.86 | 3.62 | 0.24 |
| Cyclopentadecanone | 6.59 | 7.13 | -0.54 |
| Cyclopentane | 2.21 | 2.81 | -0.60 |
| Cyclopentanol | 4.57 | 4.83 | -0.26 |
| Cyclopentanone | 3.67 | 3.93 | -0.26 |
| Cyclopropane | 1.21 | 2.27 | -1.06 |
| Cyenopyrafen | 12.24 | 12.37 | -0.13 |
| Cyfluthrin | 11.69 | 12.14 | -0.45 |
| Cymperator | 11.37 | 12.32 | -0.95 |
| Cyprazine | 10.12 | 9.66 | 0.46 |
| Cyproconazole | 10.32 | 11.18 | -0.86 |
| Cyprodinil | 9.37 | 9.47 | -0.10 |
| Cyromazine | 10.97 | 10.89 | 0.08 |
| DBCP | 4.56 | 4.53 | 0.03 |
| DCPA | 8.51 | 9.26 | -0.75 |
| DDD | 9.87 | 9.16 | 0.71 |
| DDE | 9.24 | 9.28 | -0.04 |
| Decabromodiphenyl ether | 16.12 | 15.48 | 0.64 |
| Decamethylcyclopentasiloxane | 4.95 | 5.06 | -0.11 |
| Decamethyltetrasiloxane | 4.64 | 4.56 | 0.08 |
| Decylbenzene | 7.43 | 7.12 | 0.31 |
| delta-HCH | 8.84 | 8.06 | 0.78 |
| Demeton-S-methyl | 7.32 | 7.56 | -0.24 |
| Desmedipham | 12.86 | 12.94 | -0.08 |
| Desmetryn | 9.52 | 10.26 | -0.74 |
| Devrinol | 10.62 | 10.72 | -0.10 |
| Diallylamine | 4 | 3.64 | 0.36 |
| Dibenz[a,h]anthracene | 12.59 | 12.26 | 0.33 |
| Dibenzo[b,d]thiophene | 7.28 | 7.96 | -0.68 |
| Dibenzo[b,e]pyridine | 8.35 | 8.59 | -0.24 |
| Dibenzofuran | 6.59 | 7.14 | -0.55 |
| Dibenzo-p-dioxin | 6.57 | 7.18 | -0.61 |
| Dibenzyl ether | 6.82 | 7.19 | -0.37 |
| Dibutyl ether | 3.89 | 4.09 | -0.20 |
| Dibutyl phthalate | 8.66 | 9.18 | -0.52 |
| Dibutylamine | 5.17 | 4.92 | 0.25 |
| Dicapthon | 8.49 | 7.97 | 0.52 |
| Dichlofenthion | 8.03 | 7.75 | 0.28 |
| Dichlorfenidim | 10.14 | 9.74 | 0.40 |
| Diclofop-methyl | 9.5 | 9.74 | -0.24 |
| Dicofol | 11.45 | 11.41 | 0.04 |
| Diethion | 10.01 | 9.78 | 0.23 |
| Diethofencarb | 10.1 | 8.93 | 1.17 |
| Diethyl adipate | 6.3 | 6.36 | -0.06 |
| Diethyl cellosolve | 3.13 | 3.42 | -0.29 |
| Diethyl malonate | 5.01 | 5.07 | -0.06 |
| Diethyl oxalate | 4.41 | 4.64 | -0.23 |
| Diethyl phthalate | 7.31 | 7.46 | -0.15 |
| Diethyl succinate | 5.69 | 5.5 | 0.19 |
| Diethyl sulfate | 4.6 | 5.02 | -0.42 |
| Diethyl sulphide | 3.01 | 3.34 | -0.33 |
| Diethylamine | 3.42 | 3.2 | 0.22 |
| Diethylcarbonate | 3.55 | 3.74 | -0.19 |
| Diethylene glycol monohexyl ether | 6.62 | 7.16 | -0.54 |
| Diethyleneglycol dinitrate | 5.59 | 5.75 | -0.16 |
| Diethyleneglycol monobutyl ether | 6.81 | 6.3 | 0.51 |
| Diethyleneglycol-di-n-butylether | 5.79 | 6.19 | -0.40 |
| Diethylketone | 3.2 | 3.26 | -0.06 |
| Difenoconazole | 13.05 | 12.9 | 0.15 |
| Difenoxuron | 12.95 | 11.92 | 1.03 |
| Diflubenzuron | 11.01 | 11.88 | -0.87 |
| Diflumetorim | 9.95 | 9.5 | 0.45 |
| Dihexyl phthalate | 10.43 | 10.9 | -0.47 |
| Diisoamyl ether | 4.58 | 4.37 | 0.21 |
| Diisobutyl ether | 3.4 | 3.51 | -0.11 |
| Diisobutylamine | 4.64 | 4.34 | 0.30 |
| Diisobutylene | 2.79 | 2.71 | 0.08 |
| Diisopropyl ether | 2.66 | 2.73 | -0.07 |
| Diisopropyl methylphosphonate | 5.57 | 5.55 | 0.02 |
| Diisopropyl sulfide | 3.73 | 3.2 | 0.53 |
| Diisopropylamine | 3.68 | 3.4 | 0.28 |
| Dimepiperate | 9.75 | 9.65 | 0.10 |
| Dimethachlor | 8.94 | 8.3 | 0.64 |
| Dimethametryn | 10.17 | 10.34 | -0.17 |
| Dimethenamid | 8.37 | 8.27 | 0.10 |
| Dimethoxymethane | 2.39 | 2.38 | 0.01 |
| Dimethyl hexanedioate | 5.87 | 5.76 | 0.11 |
| Dimethyl maleate | 4.86 | 4.72 | 0.14 |
| Dimethyl malonate | 4.68 | 4.47 | 0.21 |
| Dimethyl oxalate | 3.52 | 4.04 | -0.52 |
| Dimethyl phthalate | 6.8 | 6.86 | -0.06 |
| Dimethyl succinate | 4.99 | 4.9 | 0.09 |
| Dimethyl sulfate | 4.81 | 4.42 | 0.39 |
| Dimethyl sulfide | 2.95 | 2.98 | -0.03 |
| Dimethyl-(2,2-dichlorovinyl) phosphate | 5.95 | 5.24 | 0.71 |
| Dimethylacetamide | 5.33 | 4.48 | 0.85 |
| Dimethylamine | 2 | 2.36 | -0.36 |
| Dimethylether | 1.37 | 1.77 | -0.40 |
| Dimethylterephthalate | 6.81 | 6.86 | -0.05 |
| Dimethylvinphos | 8.85 | 8.82 | 0.03 |
| Dimoxystrobin | 12.65 | 12.25 | 0.40 |
| Dimpylate | 7.97 | 8.2 | -0.23 |
| Dinitramine | 8.52 | 7.95 | 0.57 |
| Dinoseb | 8.05 | 8.41 | -0.36 |
| Di-n-propyl phthalate | 7.9 | 8.32 | -0.42 |
| Diofenolan | 10.35 | 9.74 | 0.61 |
| Dioxacarb | 9.52 | 9.75 | -0.23 |
| Diphenyl 2-ethylhexyl phosphate | 10.56 | 10.8 | -0.24 |
| Diphenyl ether | 6.27 | 6.18 | 0.09 |
| Diphenylamine | 7.64 | 7.34 | 0.30 |
| Diphenylcarbonate | 6.93 | 7.82 | -0.89 |
| Diphenylmethane | 6.11 | 6.18 | -0.07 |
| Diphenylmethanol | 8.46 | 8.34 | 0.12 |
| Dipropetryn | 9.87 | 10.05 | -0.18 |
| Dipropyl ether | 2.97 | 3.23 | -0.26 |
| Dipropylamine | 3.59 | 4.06 | -0.47 |
| Disperse Red 1 | 14.66 | 14.25 | 0.41 |
| Disugran | 8.83 | 8.64 | 0.19 |
| Disulfoton | 7.82 | 7.46 | 0.36 |
| Dithianon | 11.62 | 11.9 | -0.28 |
| Dodecamethylcyclohexasiloxane | 5.77 | 5.78 | -0.01 |
| Dodecane | 4.88 | 5.02 | -0.14 |
| Dyrene | 8.41 | 8.7 | -0.29 |
| Ebufos | 8.12 | 8.24 | -0.12 |
| Eicosane | 8.42 | 8.06 | 0.36 |
| Enanthic acid | 6.81 | 6.66 | 0.15 |
| Endosulfan sulfate | 9.68 | 9.67 | 0.01 |
| Endrin | 9.02 | 8.68 | 0.34 |
| endrin aldehyde | 9.47 | 9.16 | 0.31 |
| Endrin ketone | 10.11 | 9.69 | 0.42 |
| Enzacamene | 8.53 | 8.63 | -0.10 |
| Epichlorohydrin | 3.21 | 3.14 | 0.07 |
| EPN | 10.31 | 10.61 | -0.30 |
| epsilon-Caprolactam | 7.08 | 6.8 | 0.28 |
| Eradicane | 6.3 | 6.63 | -0.33 |
| Erythritol | 10.25 | 9.94 | 0.31 |
| Esprocarb | 8.29 | 8.85 | -0.56 |
| Ethane | 0.42 | 1.22 | -0.80 |
| Ethanol | 3.2 | 3.34 | -0.14 |
| Ethene | 0.28 | 1.02 | -0.74 |
| Ethiofencarb | 9.12 | 9.64 | -0.52 |
| Ethoxybenzene | 4.12 | 4.14 | -0.02 |
| Ethychlozate | 9.85 | 10.31 | -0.46 |
| Ethyl 4-hydroxybenzoate | 8.9 | 7.74 | 1.16 |
| Ethyl acetate | 2.7 | 2.98 | -0.28 |
| Ethyl acetoacetate | 4.36 | 4.49 | -0.13 |
| Ethyl acrylate | 3.12 | 3.2 | -0.08 |
| Ethyl benzoate | 5.26 | 5.39 | -0.13 |
| Ethyl butanoate | 3.56 | 3.84 | -0.28 |
| Ethyl ether | 2.19 | 2.37 | -0.18 |
| Ethyl formate | 2.19 | 2.24 | -0.05 |
| Ethyl hexanoate | 4.42 | 4.7 | -0.28 |
| Ethyl iodide | 2.59 | 2.52 | 0.07 |
| Ethyl methacrylate | 3.34 | 3.59 | -0.25 |
| Ethyl methyl sulfide | 2.61 | 3.16 | -0.55 |
| Ethyl propanoate | 3.15 | 3.41 | -0.26 |
| Ethyl t-butyl ether | 2.69 | 2.73 | -0.04 |
| Ethyl trans-cinnamate | 6.67 | 6.07 | 0.60 |
| Ethyl vanillin | 7.49 | 7.97 | -0.48 |
| Ethyl vinyl ether | 1.71 | 1.61 | 0.10 |
| Ethylamine | 2.96 | 3.12 | -0.16 |
| Ethylbenzene | 3.72 | 3.92 | -0.20 |
| Ethylcyclohexane | 3.57 | 3.55 | 0.02 |
| Ethylene dodecanedioate | 7.75 | 7.76 | -0.01 |
| Ethylenediamine | 4.49 | 4.92 | -0.43 |
| Ethylenedichloride | 2.78 | 2.88 | -0.10 |
| Ethylpyrazine | 4.48 | 5.17 | -0.69 |
| Ethyne | 0.33 | 0.5 | -0.17 |
| Ethynylbenzene | 4.11 | 3.78 | 0.33 |
| Etofenprox | 12.48 | 11.46 | 1.02 |
| Etohexadiol | 6.65 | 7.46 | -0.81 |
| Etoxazole | 11.53 | 11.68 | -0.15 |
| Etrimfos | 8.07 | 7.91 | 0.16 |
| Fenamidone | 10.87 | 11.2 | -0.33 |
| Fenazaquin | 10.29 | 10.75 | -0.46 |
| Fenbuconazole | 10.91 | 11.11 | -0.20 |
| Fenchlorphos | 7.61 | 7.75 | -0.14 |
| Fenchol | 6.06 | 5.96 | 0.10 |
| Fenclorim | 7.32 | 7.76 | -0.44 |
| Fenhexamid | 11.77 | 12.78 | -1.01 |
| Fenobucarb | 8.19 | 8.62 | -0.43 |
| Fenothiocarb | 9.24 | 8.61 | 0.63 |
| Fenoxycarb | 11.93 | 11.27 | 0.66 |
| Fenpiclonil | 10.37 | 9.61 | 0.76 |
| Fenpropidin | 9.38 | 8.72 | 0.66 |
| Fenpropimorph | 8.69 | 8.84 | -0.15 |
| Fenpyroximate | 9.32 | 9.17 | 0.15 |
| Fenthion | 8.2 | 7.77 | 0.43 |
| Fenthoate | 8.54 | 8.84 | -0.30 |
| Fentrazamide | 11.48 | 11.38 | 0.10 |
| Fenvalerate | 12.98 | 13.38 | -0.40 |
| Ferimzone | 10.88 | 10.78 | 0.10 |
| Flamprop-M-isopropyl | 9.71 | 10.72 | -1.01 |
| Flamprop-M-methyl | 9.54 | 10.24 | -0.70 |
| Flonicamid | 10.26 | 9.79 | 0.47 |
| Fluacrypyrim | 10.15 | 10.74 | -0.59 |
| Fluazifop-butyl | 10.3 | 10.5 | -0.20 |
| Flucythrinate | 12.09 | 12.85 | -0.76 |
| Flufenoxuron | 14.74 | 14.98 | -0.24 |
| Fluometuron | 9.12 | 8.96 | 0.16 |
| Fluopyram | 10.99 | 11.01 | -0.02 |
| Fluoranthene | 8.88 | 9.02 | -0.14 |
| Fluorene | 6.9 | 7.14 | -0.24 |
| Fluoroacetone | 2.35 | 1.7 | 0.65 |
| Fluorobenzene | 2.84 | 3.14 | -0.30 |
| Fluquinconazole | 11.58 | 12.05 | -0.47 |
| Fluridone | 9.81 | 10.04 | -0.23 |
| Flurochloridone | 9.01 | 8.74 | 0.27 |
| Flurprimidol | 10.41 | 10.7 | -0.29 |
| Flusulfamide | 10.74 | 10.48 | 0.26 |
| Fluthiamide | 9.27 | 9.83 | -0.56 |
| Flutolanil | 11.28 | 10.84 | 0.44 |
| Flutriafol | 10.59 | 10.82 | -0.23 |
| Fluxapyroxad | 12.22 | 12.31 | -0.09 |
| Fluxofenim | 7.4 | 7.49 | -0.09 |
| Folbex | 11.73 | 12.22 | -0.49 |
| Forchlorfenuron | 12.85 | 12.11 | 0.74 |
| Formaldehyde diethylacetal | 3.29 | 2.98 | 0.31 |
| Formic acid | 4.06 | 3.77 | 0.29 |
| Formothion | 7.85 | 8.42 | -0.57 |
| Furalaxyl | 9.66 | 9.76 | -0.10 |
| Furan | 1.95 | 2.18 | -0.23 |
| Furfural | 3.96 | 3.92 | 0.04 |
| Fyrol FR-2 | 10.6 | 10.79 | -0.19 |
| gamma-Terpinene | 4.28 | 4.73 | -0.45 |
| Glycerol trinitrate | 6.87 | 6.57 | 0.30 |
| Glyceryltriacetate | 6.42 | 6.48 | -0.06 |
| Glycidyl butyl ether | 3.44 | 4.27 | -0.83 |
| Glyme | 3.12 | 2.82 | 0.30 |
| Guajen | 6.51 | 6.18 | 0.33 |
| Haloxyfop-etotyl | 12.14 | 11.29 | 0.85 |
| Haloxyfop-P-methyl | 9.29 | 9.94 | -0.65 |
| Harmony | 13.84 | 13.67 | 0.17 |
| Hemimellitene | 4.61 | 4.28 | 0.33 |
| Heptachlor | 7.7 | 8.19 | -0.49 |
| Heptachlor epoxide | 8.62 | 8.51 | 0.11 |
| Heptane | 2.93 | 3.12 | -0.19 |
| Heptanedioic acid | 10.69 | 11.05 | -0.36 |
| Heptenophos | 7.5 | 7.74 | -0.24 |
| Heptyl bromide | 4.26 | 4.59 | -0.33 |
| Heptylbenzene | 6.3 | 5.92 | 0.38 |
| Heroine | 11.79 | 12.74 | -0.95 |
| Hexabromobenzene | 9.53 | 8.9 | 0.63 |
| Hexachlorobenzene | 7.55 | 6.92 | 0.63 |
| Hexachlorobutadiene | 4.58 | 4.98 | -0.40 |
| Hexachloroethane | 4.47 | 4.7 | -0.23 |
| Hexaconazole | 10.79 | 11.26 | -0.47 |
| Hexaflumuron | 13.09 | 13.44 | -0.35 |
| Hexafluoro-2-propanol | 4.34 | 3.54 | 0.80 |
| Hexafluorobenzene | 2.11 | 2.24 | -0.13 |
| Hexamethylbenzene | 6.31 | 5.42 | 0.89 |
| Hexamethyldisiloxane | 2.71 | 2.68 | 0.03 |
| Hexane | 2.4 | 2.74 | -0.34 |
| Hexanenitrile | 4.08 | 3.84 | 0.24 |
| Hexazinone | 11.07 | 10.95 | 0.12 |
| Hexyl bromide | 3.77 | 4.16 | -0.39 |
| Hexylbenzene | 5.83 | 5.52 | 0.31 |
| Hydrocinnamyl alcohol | 6.79 | 6.61 | 0.18 |
| Hydroxyacetic acid | 6.08 | 6.53 | -0.45 |
| Imibenconazole | 12.92 | 12.74 | 0.18 |
| Imiprothrin | 11.24 | 11.71 | -0.47 |
| Indane | 4.28 | 5.08 | -0.80 |
| Indanofan | 11.06 | 12.12 | -1.06 |
| Indeno[1,2,3-cd]pyrene | 12.43 | 13.02 | -0.59 |
| Indole | 6.95 | 6.36 | 0.59 |
| Indoxacarb | 14.14 | 14.01 | 0.13 |
| Iodobenzene | 4.55 | 5.15 | -0.60 |
| Ioxynil | 11.31 | 10.54 | 0.77 |
| Ipconazole | 11.06 | 11.96 | -0.90 |
| Isazofos | 8.11 | 8.21 | -0.10 |
| Isoamyl acetate | 3.94 | 3.98 | -0.04 |
| Isobutene | 1.46 | 1.81 | -0.35 |
| Isobutyl acetate | 3.45 | 3.55 | -0.10 |
| Isobutyl acrylate | 3.71 | 3.77 | -0.06 |
| Isobutyl methacrylate | 4.31 | 4.16 | 0.15 |
| Isobutyl methyl ketone | 3.3 | 3.4 | -0.10 |
| Isobutylbenzene | 4.01 | 4.43 | -0.42 |
| Isobutyronitrile | 2.87 | 2.69 | 0.18 |
| Isocumene | 4.09 | 4.32 | -0.23 |
| Isofenphos | 9.63 | 9.58 | 0.05 |
| Isoprene | 2.06 | 2 | 0.06 |
| Isoprocarb | 8.02 | 8.19 | -0.17 |
| Isopropazol | 9.67 | 10.25 | -0.58 |
| Isopropyl (2,4-dichlorophenoxy)acetate | 6.21 | 7.18 | -0.97 |
| Isopropyl propionate | 3.16 | 3.59 | -0.43 |
| Isopropylacetate | 2.93 | 3.16 | -0.23 |
| Isoproturon | 10.18 | 9.52 | 0.66 |
| Isopyrazam (syn form) | 13.95 | 13.72 | 0.23 |
| Isoquinoline | 6.16 | 6.39 | -0.23 |
| Isouron | 9.51 | 9.87 | -0.36 |
| Isoxathion | 8.48 | 8.31 | 0.17 |
| Isoxazole | 2.9 | 2.55 | 0.35 |
| Jodfenphos | 9.09 | 8.98 | 0.11 |
| Kappa-Tefluthrin | 7.79 | 7.59 | 0.20 |
| Karbutilate | 12.88 | 12.9 | -0.02 |
| Kitazin | 8.98 | 8.91 | 0.07 |
| Kresoxim-methyl | 9.84 | 9.45 | 0.39 |
| KTU3616 | 10.44 | 11.24 | -0.80 |
| lambda-Cyhalothrin | 12.11 | 11.74 | 0.37 |
| Lenacil | 12.21 | 12.05 | 0.16 |
| Leptophos | 11.31 | 11.02 | 0.29 |
| Limonene oxide | 5.75 | 4.78 | 0.97 |
| Linalool | 5.97 | 5.85 | 0.12 |
| Lindane | 7.48 | 8.06 | -0.58 |
| L-Menthone | 5.18 | 5.1 | 0.08 |
| Lysodren | 9.57 | 9.16 | 0.41 |
| Malic acid | 9.9 | 10.02 | -0.12 |
| m-Anisidine | 6.07 | 5.9 | 0.17 |
| m-Anthranilic acid | 9.89 | 8.98 | 0.91 |
| m-Cresol | 6.28 | 6.08 | 0.20 |
| Mecoprop | 9.74 | 8.52 | 1.22 |
| Mefenacet | 10.29 | 10.46 | -0.17 |
| Menthol | 6.08 | 6 | 0.08 |
| Mepanipyrim | 9.38 | 9.57 | -0.19 |
| Meptyldinocap | 12.17 | 11.67 | 0.50 |
| Mercaptodimethur | 9.71 | 9.44 | 0.27 |
| Metalaxyl | 9.28 | 8.98 | 0.30 |
| Metamitron | 10.85 | 10.53 | 0.32 |
| Metconazole | 10.57 | 11.41 | -0.84 |
| Methacrylamide | 6.74 | 5.66 | 1.08 |
| Methanol | 2.84 | 3.04 | -0.20 |
| Methibenzuron | 10.04 | 10.13 | -0.09 |
| Methidathion | 8.74 | 8 | 0.74 |
| Methoprotryne | 10.63 | 10.95 | -0.32 |
| Methoxychlor | 10.57 | 9.44 | 1.13 |
| Methoxyflurane | 3.03 | 3.77 | -0.74 |
| Methyl (Z) 9-octadecenoate | 9.59 | 9.38 | 0.21 |
| Methyl 2-hydroxybenzoate | 5.86 | 5.93 | -0.07 |
| Methyl 4-hydroxybenzoate | 8.57 | 7.44 | 1.13 |
| Methyl acetate | 2.31 | 2.68 | -0.37 |
| Methyl acrylate | 2.8 | 2.9 | -0.10 |
| Methyl benzoate | 4.92 | 5.09 | -0.17 |
| Methyl cellosolve | 3.76 | 4.09 | -0.33 |
| Methyl decanoate | 5.94 | 6.12 | -0.18 |
| Methyl formate | 1.75 | 1.94 | -0.19 |
| Methyl hexanoate | 4.22 | 4.4 | -0.18 |
| Methyl isoamyl ketone | 3.97 | 3.83 | 0.14 |
| Methyl laurate | 6.84 | 6.98 | -0.14 |
| Methyl methacrylate | 3.08 | 3.29 | -0.21 |
| Methyl pivalate | 3.55 | 3.27 | 0.28 |
| Methyl propanoate | 2.9 | 3.11 | -0.21 |
| Methyl t-pentyl ether | 2.98 | 2.86 | 0.12 |
| Methyl trifluoroacetate | 1.58 | 2.69 | -1.11 |
| Methyl valerate | 3.8 | 3.97 | -0.17 |
| Methylacetamide | 5.4 | 5.07 | 0.33 |
| Methylamine | 2.55 | 2.7 | -0.15 |
| Methylbenzene | 3.31 | 3.52 | -0.21 |
| Methylchloroform | 2.7 | 3.01 | -0.31 |
| Methylcyanoacetate | 4.17 | 3.91 | 0.26 |
| Methylcyclohexane | 3.03 | 3.17 | -0.14 |
| Methylcyclopentane | 2.35 | 2.9 | -0.55 |
| Methylcyclopropylketone | 3.71 | 3.64 | 0.07 |
| Methylnitrophos | 7.62 | 7.78 | -0.16 |
| Methyl-n-propylketone | 3.19 | 3.26 | -0.07 |
| Methyloxiran | 2.36 | 2.36 | 0.00 |
| Methylparathion | 7.34 | 7.37 | -0.03 |
| Methylpropylether | 2.49 | 2.5 | -0.01 |
| Metofluthrin | 8.54 | 8.05 | 0.49 |
| Metolachlor | 9.37 | 8.83 | 0.54 |
| Metolcarb | 6.71 | 7.62 | -0.91 |
| Metominostrobin | 9.85 | 9.55 | 0.30 |
| Metoxuron | 10.35 | 9.66 | 0.69 |
| Metribuzin | 9.15 | 8.65 | 0.50 |
| Metsulfovax | 10.08 | 10.44 | -0.36 |
| Metsulfuron-methyl | 13.82 | 14.25 | -0.43 |
| Milbemectin A3 | 17.15 | 17.24 | -0.09 |
| Mocap | 8.51 | 8.38 | 0.13 |
| Molinate | 7.06 | 6.86 | 0.20 |
| Monalide | 9.71 | 9.06 | 0.65 |
| Monocrotophos | 9.37 | 8.79 | 0.58 |
| Morpholine | 4.04 | 3.73 | 0.31 |
| Moskene | 8.31 | 8.92 | -0.61 |
| MTBE | 2.48 | 2.43 | 0.05 |
| m-Toluidine | 5.42 | 5.79 | -0.37 |
| Musk ketone | 8.77 | 9.47 | -0.70 |
| Musk tebetine | 8.3 | 8.39 | -0.09 |
| Musk xylene | 8.24 | 9.4 | -1.16 |
| Myclobutanil | 9.51 | 9.67 | -0.16 |
| Myrcene | 4.08 | 3.78 | 0.30 |
| Myristyl alcohol | 8.49 | 8.5 | -0.01 |
| N,N-Diethylaniline | 5.56 | 5.65 | -0.09 |
| N,N-Dimethylaniline | 4.78 | 4.81 | -0.03 |
| N,N-Dimethylbenzylamine | 5 | 5.11 | -0.11 |
| N,N-Dimethylformamide | 4.38 | 4.18 | 0.20 |
| N,N-Dimethyl-p-toluidine | 5.46 | 5.22 | 0.24 |
| n-Amyl ether | 4.8 | 4.95 | -0.15 |
| Naphthalene | 5.37 | 5.42 | -0.05 |
| n-Butyl acetate | 3.65 | 3.84 | -0.19 |
| n-Butyl acrylate | 4.05 | 4.06 | -0.01 |
| n-Butyl methyl ether | 2.77 | 2.93 | -0.16 |
| n-Butylbenzoate | 6.25 | 6.25 | 0.00 |
| n-Butylmethacrylate | 4.41 | 4.45 | -0.04 |
| n-Decanoic acid | 8.31 | 7.95 | 0.36 |
| n-Decyl alcohol | 6.81 | 6.78 | 0.03 |
| Neohexane | 2.09 | 2.04 | 0.05 |
| Neopentyl alcohol | 4.06 | 3.93 | 0.13 |
| Neral | 5.43 | 5.39 | 0.04 |
| N-Ethylaniline | 5.46 | 5.82 | -0.36 |
| n-Heptaldehyde | 4.74 | 4.54 | 0.20 |
| n-Heptylamine | 5.29 | 5.27 | 0.02 |
| n-Hexanoic acid | 6.31 | 6.23 | 0.08 |
| n-Hexylacetate | 4.58 | 4.7 | -0.12 |
| n-Hexylamine | 4.88 | 4.84 | 0.04 |
| Niclofen | 8.57 | 8.8 | -0.23 |
| Nitrobenzene | 4.58 | 4.74 | -0.16 |
| Nitroethane | 2.88 | 2.67 | 0.21 |
| N-Methyl-2-pyrrolidone | 6.13 | 5.57 | 0.56 |
| N-Methyl-3,5-dimethylphenyl carbamate | 8.06 | 8.03 | 0.03 |
| N-Methylaniline | 4.99 | 5.4 | -0.41 |
| N-Methylformamide | 5.17 | 4.77 | 0.40 |
| N-Methylmorpholine | 3.77 | 3.65 | 0.12 |
| N-Methylpiperidine | 4.05 | 3.89 | 0.16 |
| N-Methylpyrrole | 3.28 | 2.94 | 0.34 |
| N-Methylpyrrolidine | 3.64 | 3.57 | 0.07 |
| N-Nitrosodibutylamine | 5.81 | 6.3 | -0.49 |
| N-Nitrosodiethylamine | 4.04 | 4.58 | -0.54 |
| N-Nitrosodiisopropylamine | 5.36 | 4.78 | 0.58 |
| N-Nitrosodimethylamine | 3.72 | 3.74 | -0.02 |
| N-Nitrosodipropylamine | 5.57 | 5.44 | 0.13 |
| N-Nitrosoethylbutylamine | 5.46 | 5.44 | 0.02 |
| N-Nitrosohexamethyleneimine | 6.16 | 5.67 | 0.49 |
| N-Nitrosomorpholine | 5.56 | 5.11 | 0.45 |
| N-Nitroso-N-methylethylamine | 3.85 | 4.16 | -0.31 |
| N-Nitroso-N-methyl-N-butylamine | 4.3 | 5.02 | -0.72 |
| N-Nitrosopiperidine | 5.19 | 5.35 | -0.16 |
| N-Nitrosopyrrolidine | 5.64 | 5.03 | 0.61 |
| n-Octanoic acid | 7.38 | 7.09 | 0.29 |
| n-Octylamine | 5.73 | 5.7 | 0.03 |
| Nonane | 3.9 | 3.88 | 0.02 |
| Nopinene | 3.68 | 4.27 | -0.59 |
| Norflurazon | 10.7 | 10.91 | -0.21 |
| n-Propyl acetate | 3.17 | 3.41 | -0.24 |
| n-Propyl iodide | 2.96 | 2.95 | 0.01 |
| n-Propylformate | 2.66 | 2.67 | -0.01 |
| O,O-Dimethyl-S-[2-(ethylthio)ethyl]dithiophosphate | 7.52 | 6.86 | 0.66 |
| o-Anthranilic acid | 8.16 | 7.47 | 0.69 |
| o-Cresol | 6.11 | 6.08 | 0.03 |
| Octachlorodibenzofuran | 11.9 | 11.94 | -0.04 |
| Octachlorodibenzo-p-dioxin | 13.31 | 11.98 | 1.33 |
| Octachloronaphthalene | 11.48 | 10.52 | 0.96 |
| Octadecane | 7.87 | 7.3 | 0.57 |
| Octafluoronaphthalene | 4.7 | 4.28 | 0.42 |
| Octamethylcyclotetrasiloxane | 4.22 | 4.34 | -0.12 |
| Octamethyltrisiloxane | 3.75 | 3.62 | 0.13 |
| Octane | 3.3 | 3.5 | -0.20 |
| Octylbenzene | 6.42 | 6.32 | 0.10 |
| Octylcyanide | 5.11 | 5.13 | -0.02 |
| Ofurace | 8.57 | 9.55 | -0.98 |
| Orbencarb | 8.82 | 8.78 | 0.04 |
| Orysastrobin | 10.92 | 11.07 | -0.15 |
| o-Toluidine | 4.66 | 5.79 | -1.13 |
| Oxabetrinil | 7.94 | 7.68 | 0.26 |
| Oxadiargyl | 9.86 | 9.72 | 0.14 |
| Oxadiazon | 9.42 | 9.61 | -0.19 |
| Oxirane | 1.82 | 2.18 | -0.36 |
| Oxyfluorfen | 9.21 | 9.44 | -0.23 |
| Paclobutrazol | 10.85 | 10.31 | 0.54 |
| p-Anthranilic acid | 9.46 | 8.98 | 0.48 |
| Paraoxon | 8.79 | 8.46 | 0.33 |
| p-Benzidine | 10.29 | 10.26 | 0.03 |
| PCNB | 8.48 | 7.74 | 0.74 |
| p-Cresol | 6.3 | 6.08 | 0.22 |
| p-Cresyl diphenyl phosphate | 10.6 | 10.39 | 0.21 |
| p-Cymene | 4.54 | 4.41 | 0.13 |
| Pebulate | 6.83 | 7.06 | -0.23 |
| Pelargonic acid | 7.52 | 7.52 | 0.00 |
| Penconazole | 9.81 | 9.02 | 0.79 |
| Pencycuron | 13.91 | 13.8 | 0.11 |
| Penfenate | 9 | 8.46 | 0.54 |
| Penoxalin | 8.66 | 8.93 | -0.27 |
| Penoxsulam | 13.53 | 13.3 | 0.23 |
| Pentabromoanisole | 9.01 | 8.49 | 0.52 |
| Pentabromobenzene | 8.3 | 7.97 | 0.33 |
| Pentabromotoluene | 9.61 | 8.38 | 1.23 |
| Pentachloroanisole | 6.65 | 6.84 | -0.19 |
| Pentachlorobenzene | 6.75 | 6.32 | 0.43 |
| Pentachloroethane | 4.38 | 4.26 | 0.12 |
| Pentachlorophenol | 9.01 | 8.67 | 0.34 |
| Pentachlorotoluene | 7.25 | 6.73 | 0.52 |
| Pentafluorobenzene | 2.54 | 2.42 | 0.12 |
| Pentafluorophenol | 4.42 | 4.77 | -0.35 |
| Pentamethylbenzene | 6.12 | 5.04 | 1.08 |
| Pentane | 1.95 | 2.36 | -0.41 |
| Pentanedioic acid | 9.88 | 10.19 | -0.31 |
| Pentanenitrile | 3.6 | 3.41 | 0.19 |
| Pentanoic acid | 5.94 | 5.8 | 0.14 |
| Perchlordecone | 9.12 | 9.36 | -0.24 |
| Perchlorobiphenyl | 11.61 | 12.14 | -0.53 |
| Perchlorocyclopentadiene | 5.42 | 5.18 | 0.24 |
| Perfluorobiphenyl | 4.97 | 4.34 | 0.63 |
| Perylene | 11.7 | 11.7 | 0.00 |
| Pethoxamid | 8.91 | 9.48 | -0.57 |
| Phantolide | 7.76 | 7.71 | 0.05 |
| Phenanthrene | 7.62 | 7.7 | -0.08 |
| Phenanthridine | 9.55 | 8.69 | 0.86 |
| Phenethyl alcohol | 6.16 | 6.18 | -0.02 |
| Phenmedipham | 13.4 | 13.05 | 0.35 |
| Phenol | 6.06 | 5.67 | 0.39 |
| Phenothrin | 11.7 | 10.86 | 0.84 |
| Phenylacetonitrile | 4.99 | 4.96 | 0.03 |
| Phenylhydrazine | 7.71 | 7.95 | -0.24 |
| Phenylmethanol | 5.78 | 5.75 | 0.03 |
| Phlorol | 6.49 | 6.51 | -0.02 |
| Phosphamide | 8.27 | 8.59 | -0.32 |
| Phthalic anhydride | 7.54 | 6.82 | 0.72 |
| Phthalide | 7.75 | 8.23 | -0.48 |
| Phthalthrin | 12.14 | 12.15 | -0.01 |
| Picoxystrobin | 10.05 | 9.63 | 0.42 |
| p-Imazamethabenzmethyl | 10.78 | 10.86 | -0.08 |
| Pinacolone | 3.24 | 2.99 | 0.25 |
| Pinoxaden | 12.34 | 12.44 | -0.10 |
| Piperazine | 3.77 | 4.56 | -0.79 |
| Piperidine | 4.04 | 3.97 | 0.07 |
| Piperophos | 10.54 | 11.17 | -0.63 |
| Pirimicarb | 8.9 | 9.04 | -0.14 |
| Pirimiphos-ethyl | 9.39 | 9.4 | -0.01 |
| Pirimiphos-methyl | 9.05 | 8.8 | 0.25 |
| Plinol | 5.88 | 5.9 | -0.02 |
| p-Menthane | 4.06 | 3.73 | 0.33 |
| Preforan | 9.64 | 9.44 | 0.20 |
| Prehnitene | 4.4 | 4.66 | -0.26 |
| Pretilachlor | 9.93 | 9.89 | 0.04 |
| Prochloraz | 10.16 | 10.8 | -0.64 |
| Procymidone | 8.98 | 8.65 | 0.33 |
| Profenofos | 10.1 | 9.57 | 0.53 |
| Promecarb | 8.4 | 8.6 | -0.20 |
| Prometon | 9.71 | 9.27 | 0.44 |
| Prometryn | 9.84 | 9.87 | -0.03 |
| Pronamide | 9.66 | 9.44 | 0.22 |
| Propachlor | 7.36 | 6.83 | 0.53 |
| Propafos | 9.22 | 9.31 | -0.09 |
| Propamocarb | 8.07 | 7.83 | 0.24 |
| Propanal | 3.02 | 2.82 | 0.20 |
| Propanamide | 5.85 | 5.48 | 0.37 |
| Propandioic acid | 8.81 | 7.82 | 0.99 |
| Propane | 0.97 | 1.6 | -0.63 |
| Propanenitrile | 2.69 | 2.55 | 0.14 |
| Propanoic acid | 4.85 | 4.94 | -0.09 |
| Propanone | 2.36 | 2.4 | -0.04 |
| Propaquizafop | 14.29 | 13.71 | 0.58 |
| Propazine | 9.02 | 8.99 | 0.03 |
| Propenal | 2.6 | 2.61 | -0.01 |
| Propham | 7.33 | 7.29 | 0.04 |
| Propiconazole | 10.75 | 10.9 | -0.15 |
| Propisochlor | 8.53 | 8.55 | -0.02 |
| Propoxur | 8.32 | 8.21 | 0.11 |
| Propyl 2-hexyl-3-oxocyclopentanecarboxylate | 8.59 | 8.45 | 0.14 |
| Propyl 4-hydroxybenzoate | 9.48 | 8.17 | 1.31 |
| Propyl butyrate | 3.79 | 4.27 | -0.48 |
| Propylene | 0.92 | 1.45 | -0.53 |
| Propylenecarbonate | 4.81 | 3.73 | 1.08 |
| Propyleneglycol-1-monomethylether-2-acetate | 4.16 | 3.91 | 0.25 |
| Propyne | 1.15 | 1.52 | -0.37 |
| Proquinazid | 10.43 | 10.72 | -0.29 |
| Prosulfocarb | 8.74 | 9.04 | -0.30 |
| Prothiofos | 8.78 | 8.54 | 0.24 |
| Pseudococaine | 10.58 | 10.08 | 0.50 |
| p-Toluidine | 5.31 | 5.79 | -0.48 |
| Pulegone | 5.87 | 5.53 | 0.34 |
| Pyraclofos | 11.32 | 11.27 | 0.05 |
| Pyrasulfotole | 10.47 | 10.55 | -0.08 |
| Pyrene | 8.83 | 9.42 | -0.59 |
| Pyridalyl | 12.64 | 11.76 | 0.88 |
| Pyridaphenthion | 10.93 | 11.06 | -0.13 |
| Pyridine | 3.91 | 3.99 | -0.08 |
| Pyrifenox | 9.33 | 9.16 | 0.17 |
| Pyriftalid | 11.11 | 10.64 | 0.47 |
| Pyrimethanil | 8.43 | 8.23 | 0.20 |
| Pyriminobac-methyl | 9.53 | 10.32 | -0.79 |
| Pyroquilon | 8.42 | 8.01 | 0.41 |
| Pyrrole | 3.77 | 4.42 | -0.65 |
| Pyrrolidine | 4.07 | 3.65 | 0.42 |
| Pyruvic acid | 5.16 | 5.59 | -0.43 |
| Quinalphos | 9.8 | 9.8 | 0.00 |
| Quinoclamine | 9.39 | 9.68 | -0.29 |
| Quinoline | 6.06 | 6.29 | -0.23 |
| Quinoxyfen | 9.37 | 10.17 | -0.80 |
| Randox | 6.56 | 7.01 | -0.45 |
| Resmethrin | 11.19 | 10.35 | 0.84 |
| Sabinene | 4.39 | 4.38 | 0.01 |
| Salicylic acid | 7.44 | 7.76 | -0.32 |
| s-Butylacetate | 3.32 | 3.59 | -0.27 |
| s-Butylbenzene | 4.2 | 4.43 | -0.23 |
| Sebuthylazine | 8.74 | 9.32 | -0.58 |
| Secbumeton | 8.99 | 9.6 | -0.61 |
| Sethoxydim | 11.21 | 11.35 | -0.14 |
| Siduron | 12.13 | 11.42 | 0.71 |
| Simazine | 8.81 | 8.79 | 0.02 |
| Simeconazole | 10 | 9.99 | 0.01 |
| Simeton | 9.35 | 9.07 | 0.28 |
| Simetryn | 9.86 | 9.67 | 0.19 |
| Sorbic acid | 7.11 | 5.87 | 1.24 |
| Sorbitol | 14.28 | 14.46 | -0.18 |
| Spiroxamine | 8.57 | 8.78 | -0.21 |
| Stirofos | 10.13 | 10.42 | -0.29 |
| s-trans-1,3-Butadiene | 1.62 | 1.64 | -0.02 |
| Styrene | 3.93 | 3.71 | 0.22 |
| Styrene oxide | 4.54 | 4.77 | -0.23 |
| Sulfometuron | 15.41 | 15.66 | -0.25 |
| Sulprofos | 9.42 | 8.75 | 0.67 |
| t-Butylacetate | 3.26 | 3.34 | -0.08 |
| t-Butylbenzene | 4.18 | 4.02 | 0.16 |
| Tebuconazole | 11.41 | 10.82 | 0.59 |
| Tebupirimfos | 8.72 | 8.61 | 0.11 |
| Tebuthiuron | 9.47 | 9.32 | 0.15 |
| Tedion | 8.54 | 8.71 | -0.17 |
| Teflubenzuron | 11.14 | 12.12 | -0.98 |
| Teproloxydim | 10.28 | 11.35 | -1.07 |
| Terbacil | 9.76 | 9.05 | 0.71 |
| Terbufos | 7.97 | 8.38 | -0.41 |
| Terbumeton | 9.35 | 9.12 | 0.23 |
| Terbuthylazine | 8.92 | 8.84 | 0.08 |
| Terbutryne | 9.9 | 9.72 | 0.18 |
| Terpinolene | 4.59 | 4.87 | -0.28 |
| Tetrabromobisphenol A | 14.83 | 15.15 | -0.32 |
| Tetrachlorocatechol | 9.09 | 10.42 | -1.33 |
| Tetrachloroethylene | 3.48 | 3.74 | -0.26 |
| Tetrachloroveratrole | 7.31 | 6.76 | 0.55 |
| Tetraconazole | 9.97 | 9.55 | 0.42 |
| Tetradecane | 6.11 | 5.78 | 0.33 |
| Tetradisul | 10.09 | 9.4 | 0.69 |
| Tetrahydrofuran | 2.86 | 2.82 | 0.04 |
| Tetrahydropyran | 3.22 | 3.14 | 0.08 |
| Tetramethylene glycol | 6.65 | 6.28 | 0.37 |
| Tetramethylsilane | 1.81 | 1.81 | 0.00 |
| Thenylchlor | 9.85 | 10.07 | -0.22 |
| Thifluzamide | 13.4 | 12.45 | 0.95 |
| Thimet | 7.54 | 7.68 | -0.14 |
| Thioanisole | 4.71 | 4.73 | -0.02 |
| Thiobencarb | 8.92 | 8.78 | 0.14 |
| Thiofanocarb | 8.98 | 8.64 | 0.34 |
| Thiophene | 2.91 | 2.8 | 0.11 |
| Thiophos | 8.23 | 7.97 | 0.26 |
| Thioxamyl | 9.8 | 10.19 | -0.39 |
| TNT | 7.53 | 7.99 | -0.46 |
| Tolclofos-methyl | 7.83 | 7.56 | 0.27 |
| Tonalide | 8.24 | 8.03 | 0.21 |
| Tralkoxydim | 11.89 | 12.18 | -0.29 |
| trans-1,2-Cycloheptyl dinitrate | 6.7 | 6.58 | 0.12 |
| trans-1,2-Cyclohexyl dinitrate | 5.66 | 6.26 | -0.60 |
| trans-1,2-Dichloroethylene | 2.73 | 2.34 | 0.39 |
| trans-1,3-Cyclohexyl dinitrate | 6.05 | 6.26 | -0.21 |
| trans-1,3-Dichloropropene | 3.28 | 2.95 | 0.33 |
| trans-1,4-Dichloro-2-butene | 4.15 | 3.56 | 0.59 |
| trans-2,5-Dimethyltetrahydrofuran | 3.41 | 3.18 | 0.23 |
| trans-2-Butene | 1.42 | 1.88 | -0.46 |
| trans-2-Methylcyclohexanol | 5.22 | 5.29 | -0.07 |
| trans-2-Octenal | 4.53 | 4.79 | -0.26 |
| trans-2-Octene | 3.16 | 3.48 | -0.32 |
| trans-4-Methylcyclohexanol | 5.47 | 5.29 | 0.18 |
| trans-Decalin | 4.2 | 4.47 | -0.27 |
| Transfluthrin | 8.36 | 7.76 | 0.60 |
| trans-Geraniol | 6.43 | 6.34 | 0.09 |
| trans-Nonachlor | 9.29 | 9.6 | -0.31 |
| trans-Stilbene | 7.48 | 6.4 | 1.08 |
| Traseolide | 8.18 | 8.26 | -0.08 |
| Tri-2-butoxyethyl phosphate | 10.9 | 11.3 | -0.40 |
| Triadimenol | 11.13 | 11.78 | -0.65 |
| Triallate | 7.95 | 7.8 | 0.15 |
| Triallylamine | 4.53 | 4.2 | 0.33 |
| Triasulfuron | 13.47 | 12.57 | 0.90 |
| Triazophos | 9.59 | 9.41 | 0.18 |
| Triazothion | 9.59 | 9.91 | -0.32 |
| Tributyl phosphate | 8.03 | 8.15 | -0.12 |
| Trichlopyr | 9.48 | 9.28 | 0.20 |
| Trichloroacetic acid | 7.36 | 6.2 | 1.16 |
| Trichloroethylene | 3 | 3.04 | -0.04 |
| Trichloronate | 8.42 | 8.42 | 0.00 |
| Trichlorosyringol | 8.69 | 8.51 | 0.18 |
| Tricyclene | 3.87 | 4 | -0.13 |
| Tridecane | 5.34 | 5.4 | -0.06 |
| Tridecylamine | 8.24 | 7.85 | 0.39 |
| Tridiphane | 7.09 | 8.27 | -1.18 |
| Triethyl phosphate | 5.21 | 5.57 | -0.36 |
| Triethylamine | 3.45 | 3.54 | -0.09 |
| Trifloxystrobin | 10.46 | 10.07 | 0.39 |
| Triflumuron | 11.31 | 12.38 | -1.07 |
| Trihexyl phosphate | 11.6 | 10.73 | 0.87 |
| Tri-m-cresylphosphate | 11.06 | 11.21 | -0.15 |
| Trimethyl phosphate | 5.3 | 4.67 | 0.63 |
| Trimethylacetic acid | 5.29 | 5.1 | 0.19 |
| Trimethylamine | 2.36 | 2.28 | 0.08 |
| Trimethyleneglycol dinitrate | 5.08 | 5.13 | -0.05 |
| Trimethylethylene | 1.78 | 2.24 | -0.46 |
| tri-n-Amylphosphate | 9.31 | 9.44 | -0.13 |
| Tri-o-cresylphosphate | 10.7 | 11.21 | -0.51 |
| Tri-p-cresyl phosphate | 11.3 | 11.21 | 0.09 |
| Triphenyl phosphate | 10.09 | 9.98 | 0.11 |
| Tripropyl phosphate | 6.2 | 6.86 | -0.66 |
| Tripropylamine | 4.34 | 4.83 | -0.49 |
| Tris(2-chloroethyl) phosphate | 7.85 | 7.91 | -0.06 |
| Tris(2-ethylhexyl) phosphate | 11.9 | 12.44 | -0.54 |
| Tris(2-isopropylphenyl) phosphate | 11.78 | 12.92 | -1.14 |
| Tris-BP | 13.5 | 12.86 | 0.64 |
| Tycor | 8.32 | 8.83 | -0.51 |
| Undecane | 4.56 | 4.64 | -0.08 |
| Veratrole | 4.93 | 4.36 | 0.57 |
| Vernolate | 6.8 | 7.06 | -0.26 |
| Vinclozolin | 8.69 | 7.8 | 0.89 |
| Vinyl acetate | 2.33 | 2.49 | -0.16 |
| Vinylidenechloride | 2.34 | 2.41 | -0.07 |
| Vitavax | 9.81 | 9.58 | 0.23 |
