# Supplementary material for: Calculation of the Three Partition Coefficients logPow, logKoa and logKaw of Organic Molecules at Standard Conditions at Once by Means of a Generally Applicable Group-Additivity Method
Source: Preprints.org preprint supplement (doi:10.20944/preprints202312.0275.v1), 2023-12-05
Supplement: Supplementary file 3 [file S06. Compounds with Experimental vs. Calculated logKaw Values.doc]

| **Molecule name** | **logKaw exp** | **logKaw calc** | **Diff** |
| --- | --- | --- | --- |
| (Bromomethyl)benzene | -1.74 | -2.14 | 0.40 |
| (Chloromethyl)benzene | -1.74 | -1.88 | 0.14 |
| (Trichloromethyl)benzene | -1.22 | -1.52 | 0.30 |
| 1-(2-Methylphenyl)ethanone | -3.25 | -3.17 | -0.08 |
| 1-(3-Methylphenyl)ethanone | -3.55 | -3.17 | -0.38 |
| 1,1,1,2-Tetrachloroethane | -1.09 | -1.13 | 0.04 |
| 1,1,1-Trichloropropane | -0.88 | -0.42 | -0.46 |
| 1,1,1-Trifluoro-2-propanol | -3.05 | -2.53 | -0.52 |
| 1,1,2,2-Tetrachloroethane | -1.73 | -1.23 | -0.50 |
| 1,1,2-Trichloroethane | -1.44 | -1.36 | -0.08 |
| 1,1,2-Trichloropropane | -1.89 | -1.18 | -0.71 |
| 1,1,3-Trimethylcyclopentane | 1.81 | 0.97 | 0.84 |
| 1,10-Decyl dinitrate | -3.02 | -3.19 | 0.17 |
| 1,10-Dichlorodecane | -0.69 | -1.5 | 0.81 |
| 1,12-Dichlorododecane | -0.58 | -1.39 | 0.81 |
| 1,1-Dichloroacetone | -2.83 | -2.58 | -0.25 |
| 1,1-Dichlorobutane | -0.51 | -0.65 | 0.14 |
| 1,1-Dichloroethane | -0.62 | -0.64 | 0.02 |
| 1,1-Dichloropropane | -0.81 | -0.65 | -0.16 |
| 1,1-Dichloropropene | -0.13 | -0.43 | 0.30 |
| 1,1-Diethoxyethane | -2.4 | -2.42 | 0.02 |
| 1,1-Dimethyl-3-phenylurea | -7.09 | -7.02 | -0.07 |
| 1,2,10,11-Tetrachloroundecane | -2.59 | -2.46 | -0.13 |
| 1,2,3,4,5,6,8-Heptachloronaphthalene | -3.77 | -2.98 | -0.79 |
| 1,2,3,4,5,7-Hexachloronaphthalene | -2.97 | -2.91 | -0.06 |
| 1,2,3,4,5,8-Hexachloronaphthalene | -3.37 | -2.92 | -0.45 |
| 1,2,3,4,6,7,8-Heptachlorodibenzofuran | -3.24 | -3.63 | 0.39 |
| 1,2,3,4,6,7-Hexachloronaphthalene | -3.03 | -2.91 | -0.12 |
| 1,2,3,4,6,8,9-Heptachlorodibenzofuran | -3.23 | -3.67 | 0.44 |
| 1,2,3,4,6,8-Hexachlorodibenzofuran | -3.29 | -3.6 | 0.31 |
| 1,2,3,4,6-Pentachloronaphthalene | -2.38 | -2.84 | 0.46 |
| 1,2,3,4,7,8,9-Heptachlorodibenzofuran | -3.19 | -3.67 | 0.48 |
| 1,2,3,4,7,8-Hexachlorodibenzofuran | -3.29 | -3.6 | 0.31 |
| 1,2,3,4,7,8-Hexachlorodibenzo-p-dioxin | -3.76 | -3.64 | -0.12 |
| 1,2,3,4,7-Pentachlorodibenzofuran | -3.26 | -3.49 | 0.23 |
| 1,2,3,4,7-Pentachlorodibenzo-p-dioxin | -3.56 | -3.54 | -0.02 |
| 1,2,3,4-Tetrachlorobenzene | -1.6 | -1.37 | -0.23 |
| 1,2,3,4-Tetrachlorodibenzofuran | -3.15 | -3.42 | 0.27 |
| 1,2,3,4-Tetrachlorodibenzo-p-dioxin | -3.33 | -3.47 | 0.14 |
| 1,2,3,4-Tetrachloronaphthalene | -2.58 | -2.77 | 0.19 |
| 1,2,3,4-Tetrahydronaphthalene | -1.2 | -1.46 | 0.26 |
| 1,2,3,5,6,7-Hexachloronaphthalene | -2.8 | -2.92 | 0.12 |
| 1,2,3,5,7,8-Hexachloronaphthalene | -3.02 | -2.91 | -0.11 |
| 1,2,3,5,7-Pentachloronaphthalene | -2.23 | -2.84 | 0.61 |
| 1,2,3,5,8-Pentachloronaphthalene | -2.67 | -2.84 | 0.17 |
| 1,2,3,5-Tetrachlorobenzene | -1.4 | -1.37 | -0.03 |
| 1,2,3,5-Tetrachloronaphthalene | -2.51 | -2.77 | 0.26 |
| 1,2,3,5-Tetrafluorobenzene | -0.1 | -0.3 | 0.20 |
| 1,2,3,6,7,8-Hexachlorodibenzofuran | -3.29 | -3.6 | 0.31 |
| 1,2,3,6,7,8-Hexachlorodibenzo-p-dioxin | -3.78 | -3.64 | -0.14 |
| 1,2,3,7,8,9-Hexachlorodibenzofuran | -3.28 | -3.6 | 0.32 |
| 1,2,3,7,8,9-Hexachlorodibenzo-p-dioxin | -3.78 | -3.64 | -0.14 |
| 1,2,3,7,8-Pentachlorodibenzofuran | -3.26 | -3.49 | 0.23 |
| 1,2,3,7,8-Pentachlorodibenzo-p-dioxin | -3.57 | -3.54 | -0.03 |
| 1,2,3,7-Tetrachlorodibenzofuran | -3.14 | -3.42 | 0.28 |
| 1,2,3,7-Tetrachlorodibenzo-p-dioxin | -3.33 | -3.5 | 0.17 |
| 1,2,3-Propanetriol | -10.07 | -9.41 | -0.66 |
| 1,2,3-Trichlorobenzene | -1.3 | -1.3 | 0.00 |
| 1,2,3-Trichloropropane | -2 | -2.01 | 0.01 |
| 1,2,4,5,8-Pentachloronaphthalene | -2.81 | -2.85 | 0.04 |
| 1,2,4,5-Tetrachlorobenzene | -1.39 | -1.37 | -0.02 |
| 1,2,4,5-Tetrafluorobenzene | -0.14 | -0.29 | 0.15 |
| 1,2,4,5-Tetramethylbenzene | -1 | -0.87 | -0.13 |
| 1,2,4,6,7,8-Hexachlorodibenzofuran | -3.29 | -3.6 | 0.31 |
| 1,2,4,6,7,9-Hexachlorodibenzo-p-dioxin | -3.71 | -3.61 | -0.10 |
| 1,2,4,6,8,9-Hexachlorodibenzofuran | -3.29 | -3.6 | 0.31 |
| 1,2,4,7,8-Pentachlorodibenzofuran | -3.26 | -3.49 | 0.23 |
| 1,2,4,7,8-Pentachlorodibenzo-p-dioxin | -3.79 | -3.54 | -0.25 |
| 1,2,4-Trichlorobenzene | -1.24 | -1.3 | 0.06 |
| 1,2,4-Trichlorodibenzo-p-dioxin | -3.04 | -3.4 | 0.36 |
| 1,2,4-Trichloronaphthalene | -2.32 | -2.71 | 0.39 |
| 1,2,4-Trimethylbenzene | -0.76 | -0.85 | 0.09 |
| 1,2,4-Trimethylnaphthalene | -2.24 | -2.05 | -0.19 |
| 1,2,5,6-Tetramethylnaphthalene | -2.26 | -1.98 | -0.28 |
| 1,2,5,8-Tetrachloronaphthalene | -2.74 | -2.78 | 0.04 |
| 1,2,5-Trichloronaphthalene | -2.44 | -2.71 | 0.27 |
| 1,2,6,8-Tetrachloronaphthalene | -2.74 | -2.77 | 0.03 |
| 1,2,6-Trichloronaphthalene | -2.62 | -2.71 | 0.09 |
| 1,2,7,8-Tetrachlorodibenzofuran | -3.16 | -3.42 | 0.26 |
| 1,2,7,8-Tetrachlorodibenzo-p-dioxin | -3.28 | -3.47 | 0.19 |
| 1,2,7-Trichloronaphthalene | -2.56 | -2.71 | 0.15 |
| 1,2,9,10-Tetrachlorodecane | -2.14 | -2.56 | 0.42 |
| 1,2-Benzenedicarboxylic acid, di-2-propenyl ester | -4.94 | -5.27 | 0.33 |
| 1,2-Bis(2-chloroethylthio)ethane | -5.34 | -4.07 | -1.27 |
| 1,2-Butanediol | -6.72 | -6.28 | -0.44 |
| 1,2-Butyl dinitrate | -2.71 | -2.97 | 0.26 |
| 1,2-Decyl dinitrate | -1.69 | -2.97 | 1.28 |
| 1,2-Diaminobenzene | -5.77 | -7.03 | 1.26 |
| 1,2-Dibromobenzene | -1.53 | -1.65 | 0.12 |
| 1,2-Dibromoethane | -1.71 | -2.01 | 0.30 |
| 1,2-Dibromopropane | -1.42 | -1.53 | 0.11 |
| 1,2-Dibutoxyethane | -2.8 | -2.48 | -0.32 |
| 1,2-Dichlorobenzene | -1.14 | -1.23 | 0.09 |
| 1,2-Dichloronaphthalene | -2.47 | -2.63 | 0.16 |
| 1,2-Dichloropropane | -0.95 | -1.31 | 0.36 |
| 1,2-Difluorobenzene | -0.51 | -0.69 | 0.18 |
| 1,2-Dihydroxybenzene | -7.01 | -6.59 | -0.42 |
| 1,2-Dimethylbenzene | -0.7 | -0.83 | 0.13 |
| 1,2-Dimethylnaphthalene | -2.08 | -2.03 | -0.05 |
| 1,2-Diphenylethane | -2.11 | -1.55 | -0.56 |
| 1,2-Ethanediol | -7.21 | -6.55 | -0.66 |
| 1,2-Ethanediol dinitrate | -3.29 | -3.27 | -0.02 |
| 1,2-Hexanediol | -6.62 | -6.28 | -0.34 |
| 1,2-Hexyl dinitrate | -2.38 | -2.97 | 0.59 |
| 1,2-Octyl dinitrate | -2.11 | -2.97 | 0.86 |
| 1,2-Pentanediol | -6.54 | -6.28 | -0.26 |
| 1,2-Pentyl dinitrate | -2.52 | -2.97 | 0.45 |
| 1,2-Propanediol | -6.83 | -6.28 | -0.55 |
| 1,2-Propyl dinitrate | -2.9 | -2.97 | 0.07 |
| 1,3,5,7-Tetrachloronaphthalene | -2.19 | -2.77 | 0.58 |
| 1,3,5,8-Tetrachloronaphthalene | -2.52 | -2.77 | 0.25 |
| 1,3,5-Cycloheptatriene | -0.74 | -0.97 | 0.23 |
| 1,3,5-Tribromobenzene | -1.51 | -1.93 | 0.42 |
| 1,3,5-Trichlorobenzene | -1.11 | -1.3 | 0.19 |
| 1,3,5-Trichloronaphthalene | -2.25 | -2.71 | 0.46 |
| 1,3,5-Triethylbenzene | -0.4 | -0.62 | 0.22 |
| 1,3,5-Trimethylbenzene | -0.55 | -0.85 | 0.30 |
| 1,3,5-Trinitrobenzene | -6.91 | -5.74 | -1.17 |
| 1,3,5-Trioxane | -3.3 | -3.11 | -0.19 |
| 1,3,6,8-Tetrachlorodibenzofuran | -3.08 | -3.42 | 0.34 |
| 1,3,6,8-Tetrachlorodibenzo-p-dioxin | -3.22 | -3.47 | 0.25 |
| 1,3,7,8-Tetrachlorodibenzofuran | -3.11 | -3.42 | 0.31 |
| 1,3,7,8-Tetrachlorodibenzo-p-dioxin | -3.28 | -3.5 | 0.22 |
| 1,3,7,9-Tetrachlorodibenzofuran | -3.12 | -3.42 | 0.30 |
| 1,3,7,9-Tetrachlorodibenzo-p-dioxin | -3.24 | -3.47 | 0.23 |
| 1,3,7-Trichlorodibenzo-p-dioxin | -3.03 | -3.4 | 0.37 |
| 1,3,7-Trimethylnaphthalene | -2.17 | -1.96 | -0.21 |
| 1,3-Butyl dinitrate | -3.15 | -2.97 | -0.18 |
| 1,3-Butyleneglycol | -6.37 | -6.28 | -0.09 |
| 1,3-Diaminobenzene | -7.35 | -7.04 | -0.31 |
| 1,3-Dibromobenzene | -1.47 | -1.65 | 0.18 |
| 1,3-Dibromopropane | -1.44 | -2.02 | 0.58 |
| 1,3-Dichloro-2-propanol | -4.33 | -4.55 | 0.22 |
| 1,3-Dichlorobenzene | -0.89 | -1.23 | 0.34 |
| 1,3-Dichloropropane | -1.44 | -1.48 | 0.04 |
| 1,3-Diethylbenzene | -0.47 | -0.66 | 0.19 |
| 1,3-Difluorobenzene | -0.35 | -0.69 | 0.34 |
| 1,3-Dihydroxybenzene | -8.39 | -6.59 | -1.80 |
| 1,3-Diisopropylbenzene | -0.46 | -0.26 | -0.20 |
| 1,3-Diisopropylnaphthalene | -1.29 | -1.42 | 0.13 |
| 1,3-Dimethylbenzene | -0.57 | -0.83 | 0.26 |
| 1,3-Dimethylnaphthalene | -1.81 | -2.03 | 0.22 |
| 1,3-Dinitrobenzene | -4.96 | -4.19 | -0.77 |
| 1,3-Dioxane | -3.5 | -2.82 | -0.68 |
| 1,3-Dioxolan-2-one | -3 | -3.73 | 0.73 |
| 1,3-Propanediol | -7.09 | -6.57 | -0.52 |
| 1,4,5,8-Tetrachloronaphthalene | -2.94 | -2.78 | -0.16 |
| 1,4,5-Trichloronaphthalene | -2.75 | -2.71 | -0.04 |
| 1,4,5-Trimethylnaphthalene | -2.02 | -2.05 | 0.03 |
| 1,4,6,7-Tetramethylnaphthalene | -2.33 | -1.98 | -0.35 |
| 1,4,6-Trimethylnaphthalene | -2.03 | -1.96 | -0.07 |
| 1,4-Benzoquinone | -4.71 | -5.01 | 0.30 |
| 1,4-Bis(methylamino)anthraquinone | -8.11 | -8.42 | 0.31 |
| 1,4-Butyl dinitrate | -3.59 | -3.25 | -0.34 |
| 1,4-Cyclohexadiene | -0.51 | -0.81 | 0.30 |
| 1,4-Diaminoanthraquinone | -8.1 | -8.9 | 0.80 |
| 1,4-Dibromobenzene | -1.37 | -1.65 | 0.28 |
| 1,4-Dibromobutane | -1.77 | -2.02 | 0.25 |
| 1,4-Dibromonaphthalene | -2.16 | -3.06 | 0.90 |
| 1,4-Dichlorobenzene | -0.9 | -1.23 | 0.33 |
| 1,4-Dichlorobutane | -1.7 | -1.47 | -0.23 |
| 1,4-Dichloronaphthalene | -2.27 | -2.63 | 0.36 |
| 1,4-Diethylbenzene | -0.41 | -0.66 | 0.25 |
| 1,4-Difluorobenzene | -0.6 | -0.69 | 0.09 |
| 1,4-Dimethylbenzene | -0.57 | -0.83 | 0.26 |
| 1,4-Dimethylnaphthalene | -2.07 | -2.03 | -0.04 |
| 1,4-Dinitrobenzene | -5 | -4.19 | -0.81 |
| 1,4-Dioxane | -3.71 | -3.29 | -0.42 |
| 1,4-Pentadiene | 0.68 | 0.21 | 0.47 |
| 1,4-Pentanediol | -6.14 | -6.28 | 0.14 |
| 1,4-Pentyl dinitrate | -2.98 | -2.96 | -0.02 |
| 1,5-Dichloronaphthalene | -2 | -2.64 | 0.64 |
| 1,5-Dichloropentane | -1.39 | -1.46 | 0.07 |
| 1,5-Dimethylnaphthalene | -1.84 | -2.03 | 0.19 |
| 1,5-Hexadiene | 0.74 | 0.27 | 0.47 |
| 1,5-Hexyl dinitrate | -2.83 | -2.95 | 0.12 |
| 1,5-Pentanediol | -8.24 | -6.52 | -1.72 |
| 1,5-Pentyl dinitrate | -3.46 | -3.24 | -0.22 |
| 1,6,7-Trichloronaphthalene | -2.56 | -2.71 | 0.15 |
| 1,6-Dimethylnaphthalene | -1.89 | -1.94 | 0.05 |
| 1,6-Heptadiene | 0.86 | 0.38 | 0.48 |
| 1,6-Heptadiyne | -1.06 | -0.88 | -0.18 |
| 1,6-Hexanedioic acid | -11.15 | -9.98 | -1.17 |
| 1,6-Hexyl dinitrate | -3.57 | -3.23 | -0.34 |
| 1,7-Dimethylnaphthalene | -1.98 | -2.03 | 0.05 |
| 1,7-Heptyl dinitrate | -3.45 | -3.22 | -0.23 |
| 1,8-Cineole | -2.16 | -2.13 | -0.03 |
| 1,8-Dibromooctane | -1.51 | -2.02 | 0.51 |
| 1,8-Dichlorooctane | -1.25 | -1.5 | 0.25 |
| 1,8-Dimethylnaphthalene | -2.25 | -2.03 | -0.22 |
| 1,8-Nonadiyne | -0.87 | -0.76 | -0.11 |
| 1,8-Octyl dinitrate | -3.29 | -3.21 | -0.08 |
| 1-Amino-4-hydroxyanthraquinone | -6.87 | -8.67 | 1.80 |
| 1-Aminoanthraquinone | -6.7 | -7.93 | 1.23 |
| 1-Bromo-2-ethylbenzene | -0.87 | -1.46 | 0.59 |
| 1-Bromo-2-fluorobenzene | -1.01 | -1.18 | 0.17 |
| 1-Bromo-2-methylbutane | -0.02 | -0.9 | 0.88 |
| 1-Bromo-3-chloropropane | -1.99 | -1.74 | -0.25 |
| 1-Bromo-3-fluorobenzene | -0.86 | -1.18 | 0.32 |
| 1-Bromo-4-chlorobenzene | -1.23 | -1.45 | 0.22 |
| 1-Bromobutane | -0.29 | -1.01 | 0.72 |
| 1-Bromodecane | 0.38 | -1.04 | 1.42 |
| 1-Bromonaphthalene | -1.93 | -2.78 | 0.85 |
| 1-Bromooctane | 0.38 | -0.97 | 1.35 |
| 1-Bromopentane | -0.09 | -1 | 0.91 |
| 1-Bromopropane | -0.44 | -1.02 | 0.58 |
| 1-Butanol | -3.39 | -3.38 | -0.01 |
| 1-Butene | 0.98 | 0.16 | 0.82 |
| 1-Butoxy-2-propanol | -3.73 | -4.33 | 0.60 |
| 1-Butylamine | -3.11 | -3.25 | 0.14 |
| 1-Butyne | -0.14 | -0.47 | 0.33 |
| 1-Chloro-2,4-dinitrobenzene | -5.01 | -4.29 | -0.72 |
| 1-Chloro-2-fluorobenzene | -0.88 | -0.97 | 0.09 |
| 1-Chloro-3-fluorobenzene | -0.61 | -0.97 | 0.36 |
| 1-Chlorobutane | -0.14 | -0.75 | 0.61 |
| 1-Chlorodibenzo-p-dioxin | -2.5 | -3.26 | 0.76 |
| 1-Chloroheptane | 0.21 | -0.72 | 0.93 |
| 1-Chlorohexane | -0.01 | -0.78 | 0.77 |
| 1-Chloronaphthalene | -1.84 | -2.56 | 0.72 |
| 1-Chlorooctane | 0.37 | -0.78 | 1.15 |
| 1-Chloropentane | -0.01 | -0.74 | 0.73 |
| 1-Chloropropane | -0.28 | -0.76 | 0.48 |
| 1-Decene | 1.6 | 0.55 | 1.05 |
| 1-Dodecanol | -2.58 | -3.3 | 0.72 |
| 1-Ethoxy-butane | -1.28 | -1.22 | -0.06 |
| 1-Ethylnaphthalene | -1.72 | -1.95 | 0.23 |
| 1-Heptanol | -3.09 | -3.35 | 0.26 |
| 1-Heptene | 1.22 | 0.34 | 0.88 |
| 1-Heptyne | 0.44 | -0.26 | 0.70 |
| 1-Hexadecanol | -2.72 | -3.26 | 0.54 |
| 1-Hexanol | -3.16 | -3.36 | 0.20 |
| 1-Hexene | 1.16 | 0.28 | 0.88 |
| 1-Hexyl nitrate | -1.22 | -1.62 | 0.40 |
| 1-Hexyne | 0.19 | -0.35 | 0.54 |
| 1-Hydroxy-2-butyl nitrate | -5.17 | -4.71 | -0.46 |
| 1-Hydroxy-2-propyl nitrate | -5.24 | -4.72 | -0.52 |
| 1-Hydroxy-3-butyl nitrate | -5.25 | -4.71 | -0.54 |
| 1-Hydroxy-4-pentyl nitrate | -5.45 | -4.7 | -0.75 |
| 1-Hydroxyanthraquinone | -6.52 | -7.71 | 1.19 |
| 1-Iodobutane | -0.23 | -0.42 | 0.19 |
| 1-Iodoheptane | 0.19 | -0.39 | 0.58 |
| 1-Iodohexane | 0.06 | -0.42 | 0.48 |
| 1-Iodopentane | -0.17 | -0.41 | 0.24 |
| 1-Methoxy-2-propanol | -4.43 | -4.45 | 0.02 |
| 1-Methyl-4-isopropyl-7-oxabicyclo[2.2.1]heptane | -2.11 | -2.11 | 0.00 |
| 1-Methyl-4-isopropylcyclohexene | -0.07 | -0.17 | 0.10 |
| 1-Methylcyclohexene | 0.49 | -0.56 | 1.05 |
| 1-Methylfluorene | -2.67 | -2.45 | -0.22 |
| 1-Methylnaphthalene | -1.79 | -2.01 | 0.22 |
| 1-Methylphenanthrene | -2.7 | -3.21 | 0.51 |
| 1-Methylpiperazine | -5.43 | -5.03 | -0.40 |
| 1-Naphthaleneacetic acid | -6.95 | -6.87 | -0.08 |
| 1-Naphthylamine | -5.34 | -5.46 | 0.12 |
| 1-Nitrobutane | -2.27 | -2.24 | -0.03 |
| 1-Nitronaphthalene | -4.14 | -4.04 | -0.10 |
| 1-Nitrooxy-2-butanol | -5.15 | -4.72 | -0.43 |
| 1-Nitrooxy-2-propanol | -5.43 | -4.72 | -0.71 |
| 1-Nitropentane | -2.07 | -2.23 | 0.16 |
| 1-Nitropropane | -2.51 | -2.25 | -0.26 |
| 1-Nonanol | -2.85 | -3.33 | 0.48 |
| 1-Nonene | 1.51 | 0.46 | 1.05 |
| 1-Nonyne | 0.77 | -0.14 | 0.91 |
| 1-Octadecanol | -1.44 | -3.41 | 1.97 |
| 1-Octanol | -3 | -3.34 | 0.34 |
| 1-Octyne | 0.52 | -0.2 | 0.72 |
| 1-Pentadecene | 2.25 | 0.85 | 1.40 |
| 1-Pentanol | -3.27 | -3.37 | 0.10 |
| 1-Pentene | 1.22 | 0.25 | 0.97 |
| 1-Pentyl nitrate | -1.17 | -1.66 | 0.49 |
| 1-Pentyne | -0.12 | -0.41 | 0.29 |
| 1-Phenyl-1-propanone | -3.37 | -3.09 | -0.28 |
| 1-Propanol | -3.52 | -3.39 | -0.13 |
| 1-Propylamine | -3.29 | -3.26 | -0.03 |
| 1-trans-5-trans-9-cis-Cyclododecatriene | 0.36 | -0.68 | 1.04 |
| 1-Tridecanol | -2.47 | -3.29 | 0.82 |
| 1-Undecanol | -2.47 | -3.31 | 0.84 |
| 2-(2,4-Dichlorophenoxy)propanoic acid | -7.37 | -5.71 | -1.66 |
| 2-(2-Butoxyethoxy)ethyl acetate | -4.97 | -4.51 | -0.46 |
| 2-(Phenoxymethyl)oxirane | -4.47 | -3.22 | -1.25 |
| 2,2,2-Trichloroethanol | -3.86 | -3.76 | -0.10 |
| 2,2,2-Trifluoroethanol | -3.07 | -2.82 | -0.25 |
| 2,2,2-Trifluoroethyl formate | -1.14 | -1.29 | 0.15 |
| 2,2,2-Trifluoroethylacetate | -1.16 | -1.51 | 0.35 |
| 2,2',3,3',4,4',5,5',6-Nonachlorobiphenyl | -3.47 | -2.9 | -0.57 |
| 2,2',3,3',4,4',5,5',6-Nonachlorodiphenyl ether | -1.26 | -2.94 | 1.68 |
| 2,2',3,3',4,4',5,5'-Octachlorobiphenyl | -3.39 | -2.83 | -0.56 |
| 2,2',3,3',4,4',5,6,6'-Nonachlorobiphenyl | -2.91 | -2.9 | -0.01 |
| 2,2',3,3',4,4',5,6'-Octachlorobiphenyl | -3.39 | -2.83 | -0.56 |
| 2,2',3,3',4,4',5-Heptachlorobiphenyl | -3.43 | -2.76 | -0.67 |
| 2,2',3,3',4,4',6,6'-Octachlorobiphenyl | -2.67 | -2.83 | 0.16 |
| 2,2',3,3',4,4',6-Heptachlorobiphenyl | -3.5 | -2.76 | -0.74 |
| 2,2',3,3',4,4'-Hexachlorobiphenyl | -2.56 | -2.69 | 0.13 |
| 2,2',3,3',4,4'-Hexachlorodiphenyl ether | -2.31 | -2.74 | 0.43 |
| 2,2',3,3',4,5,5',6,6'-Nonachlorobiphenyl | -2.78 | -2.93 | 0.15 |
| 2,2',3,3',4,5,5',6'-Octachlorobiphenyl | -3.39 | -2.83 | -0.56 |
| 2,2',3,3',4,5,5',6-Octachlorobiphenyl | -3.24 | -2.83 | -0.41 |
| 2,2',3,3',4,5,5'-Heptachlorobiphenyl | -3.27 | -2.76 | -0.51 |
| 2,2',3,3',4,5,6,6'-Octachlorobiphenyl | -1.57 | -2.83 | 1.26 |
| 2,2',3,3',4,5',6'-Heptachlorobiphenyl | -2.87 | -2.76 | -0.11 |
| 2,2',3,3',4,5',6-Heptachlorobiphenyl | -2.93 | -2.76 | -0.17 |
| 2,2',3,3',4,5'-Hexachlorobiphenyl | -2.83 | -2.69 | -0.14 |
| 2,2',3,3',4,6,6'-Heptachlorobiphenyl | -3.11 | -2.76 | -0.35 |
| 2,2',3,3',4,6'-Hexachlorobiphenyl | -2.75 | -2.69 | -0.06 |
| 2,2',3,3',4,6-Hexachlorobiphenyl | -2.8 | -2.69 | -0.11 |
| 2,2',3,3',4-Pentabromodiphenyl ether | -3.25 | -3.72 | 0.47 |
| 2,2',3,3',5,5',6,6'-Octachlorobiphenyl | -3.13 | -2.83 | -0.30 |
| 2,2',3,3',5,5',6-Heptachlorobiphenyl | -3.03 | -2.76 | -0.27 |
| 2,2',3,3',5,6,6'-Heptachlorobiphenyl | -3.01 | -2.76 | -0.25 |
| 2,2',3,3',5,6'-Hexachlorobiphenyl | -2.64 | -2.69 | 0.05 |
| 2,2',3,3',5,6-Hexachlorobiphenyl | -2.7 | -2.69 | -0.01 |
| 2,2',3,3',6,6'-Hexachlorobiphenyl | -2.44 | -2.69 | 0.25 |
| 2,2',3,3',6-Pentachlorobiphenyl | -2.76 | -2.62 | -0.14 |
| 2,2',3,3'-Tetrachlorobiphenyl | -2.39 | -2.55 | 0.16 |
| 2,2,3,3-Tetramethylbutane | 1.99 | 2.08 | -0.09 |
| 2,2',3,4,4',5,5',6-Octachlorobiphenyl | -1.9 | -2.83 | 0.93 |
| 2,2',3,4,4',5,5'-Heptachlorobiphenyl | -3.39 | -2.76 | -0.63 |
| 2,2',3,4,4',5,5'-Heptachlorodiphenyl ether | -1.09 | -2.81 | 1.72 |
| 2,2',3,4,4',5',6-Heptabromodiphenylether | -5.52 | -4.29 | -1.23 |
| 2,2',3,4,4',5',6-Heptachlorobiphenyl | -2.52 | -2.76 | 0.24 |
| 2,2',3,4,4',5,6'-Heptachlorobiphenyl | -2.12 | -2.76 | 0.64 |
| 2,2',3,4,4',5,6-Heptachlorobiphenyl | -1.47 | -2.76 | 1.29 |
| 2,2',3,4,4',5'-Hexachlorobiphenyl | -3.07 | -2.69 | -0.38 |
| 2,2',3,4,4',5-Hexachlorobiphenyl | -2.23 | -2.69 | 0.46 |
| 2,2',3,4,4',5'-Hexachlorodiphenyl ether | -1.86 | -2.74 | 0.88 |
| 2,2',3,4,4',5-Hexachlorodiphenyl ether | -1.65 | -2.74 | 1.09 |
| 2,2',3,4,4',6-Hexachlorobiphenyl | -2.22 | -2.69 | 0.47 |
| 2,2',3,4,4',6'-Hexachlorodiphenyl ether | -1.87 | -2.74 | 0.87 |
| 2,2',3,4,4'-Pentabromodiphenyl ether | -4.26 | -3.72 | -0.54 |
| 2,2',3,4,4'-Pentachlorobiphenyl | -2.54 | -2.62 | 0.08 |
| 2,2',3,4,4'-Pentachlorodiphenyl ether | -2.11 | -2.67 | 0.56 |
| 2,2',3,4,5,5',6-Heptachlorobiphenyl | -3.18 | -2.76 | -0.42 |
| 2,2',3,4',5,5',6-Heptachlorobiphenyl | -3.11 | -2.76 | -0.35 |
| 2,2',3,4,5,5'-Hexachlorobiphenyl | -3.03 | -2.69 | -0.34 |
| 2,2',3,4',5,5'-Hexachlorobiphenyl | -2.99 | -2.69 | -0.30 |
| 2,2',3,4',5,6,6'-Heptachlorobiphenyl | -2.25 | -2.76 | 0.51 |
| 2,2',3,4',5,6-Hexachlorobiphenyl | -2.68 | -2.69 | 0.01 |
| 2,2',3,4,5',6-Hexachlorobiphenyl | -1.92 | -2.69 | 0.77 |
| 2,2',3,4',5',6-Hexachlorobiphenyl | -1.57 | -2.69 | 1.12 |
| 2,2',3,4,5'-Pentachlorobiphenyl | -2.52 | -2.62 | 0.10 |
| 2,2',3,4',5'-Pentachlorobiphenyl | -1.76 | -2.62 | 0.86 |
| 2,2',3,4',6-Pentachlorobiphenyl | -2.31 | -2.62 | 0.31 |
| 2,2',3,4'-Tetrachlorobiphenyl | -2.24 | -2.55 | 0.31 |
| 2,2',3,4-Tetrachlorobiphenyl | -2.24 | -2.55 | 0.31 |
| 2,2',3,5,5',6-Hexachlorobiphenyl | -2.62 | -2.69 | 0.07 |
| 2,2',3,5',6-Pentachlorobiphenyl | -2.31 | -2.62 | 0.31 |
| 2,2',3,5'-Tetrachlorobiphenyl | -2.24 | -2.55 | 0.31 |
| 2,2',3-Trichlorobiphenyl | -2.09 | -2.48 | 0.39 |
| 2,2,3-Trimethylhexane | 2.34 | 1.9 | 0.44 |
| 2,2,3-Trimethylpentane | 1.92 | 1.75 | 0.17 |
| 2,2',4,4',5,5'-Hexabromodiphenyl ether | -3.96 | -4 | 0.04 |
| 2,2',4,4',5,5'-Hexachlorobiphenyl | -2.52 | -2.69 | 0.17 |
| 2,2',4,4',5,5'-Hexachlorodiphenyl ether | -1.51 | -2.74 | 1.23 |
| 2,2',4,4',5,6'-Hexabromodiphenyl ether | -4.01 | -4 | -0.01 |
| 2,2',4,4',5,6'-Hexachlorodiphenyl ether | -1.54 | -2.74 | 1.20 |
| 2,2',4,4',5-Pentabromodiphenyl ether | -3.67 | -3.72 | 0.05 |
| 2,2',4,4',5-Pentachlorobiphenyl | -1.74 | -2.62 | 0.88 |
| 2,2',4,4',5-Pentachlorodiphenyl ether | -1.65 | -2.67 | 1.02 |
| 2,2',4,4',6,6'-Hexachlorobiphenyl | -1.51 | -2.69 | 1.18 |
| 2,2',4,4',6-Pentabromodiphenyl ether | -3.81 | -3.72 | -0.09 |
| 2,2',4,4',6-Pentachlorodiphenyl ether | -1.72 | -2.67 | 0.95 |
| 2,2',4,4'-Tetrabromodiphenyl ether | -3.35 | -3.44 | 0.09 |
| 2,2',4,4'-Tetrachlorobiphenyl | -2.72 | -2.55 | -0.17 |
| 2,2',4,4'-Tetrachlorodiphenyl ether | -1.86 | -2.6 | 0.74 |
| 2,2',4,5,5'-PCB | -2.43 | -2.62 | 0.19 |
| 2,2',4,5,5'-Pentachlorodiphenyl ether | -1.6 | -2.67 | 1.07 |
| 2,2',4,5'-Tetrachlorobiphenyl | -1.83 | -2.55 | 0.72 |
| 2,2',4,5-Tetrachlorobiphenyl | -1.73 | -2.58 | 0.85 |
| 2,2',4,6,6'-Pentachlorobiphenyl | -1.6 | -2.65 | 1.05 |
| 2,2',4,6'-Tetrachlorobiphenyl | -2.24 | -2.55 | 0.31 |
| 2,2',4-Tribromodiphenyl ether | -3.53 | -3.16 | -0.37 |
| 2,2',4-Trichlorobiphenyl | -1.91 | -2.48 | 0.57 |
| 2,2',4-Trichlorodiphenylether | -3.04 | -2.55 | -0.49 |
| 2,2',5,5'-Tetrachlorobiphenyl | -2.09 | -2.55 | 0.46 |
| 2,2,5,5-Tetramethyl-3-hexyne | 1.08 | 0.51 | 0.57 |
| 2,2',5,6'-Tetrachlorobiphenyl | -1.77 | -2.55 | 0.78 |
| 2,2',5-Trichlorobiphenyl | -2.86 | -2.48 | -0.38 |
| 2,2,5-Trimethyl-3-hexyne | 0.87 | 0.11 | 0.76 |
| 2,2,5-Trimethylhexane | 2.33 | 1.9 | 0.43 |
| 2,2',6,6'-Tetrachlorobiphenyl | -2.08 | -2.55 | 0.47 |
| 2,2,6,6-Tetramethylheptane | 2.63 | 2.5 | 0.13 |
| 2,2',6-Trichlorobiphenyl | -2.03 | -2.48 | 0.45 |
| 2,2'-Dichlorobiphenyl | -2.06 | -2.41 | 0.35 |
| 2,2'-Dichlorodiisopropyl ether | -1.87 | -2.1 | 0.23 |
| 2,2-Dichloroethanol | -2.79 | -3.99 | 1.20 |
| 2,2-Dichloropropane | -0.32 | -0.4 | 0.08 |
| 2,2-Dichloropropionic acid | -5.62 | -4.76 | -0.86 |
| 2,2-Dimethoxypropane | -2.53 | -0.93 | -1.60 |
| 2,2-Dimethyl-3-hexyne | 0.45 | -0.08 | 0.53 |
| 2,2-Dimethylheptane | 2.32 | 1.76 | 0.56 |
| 2,2-Dimethylhexane | 2.22 | 1.61 | 0.61 |
| 2,2-Dimethyloctane | 2.42 | 1.91 | 0.51 |
| 2,2-Dimethylpentane | 2.11 | 1.46 | 0.65 |
| 2,2-Dimethylpropane | 1.83 | 1.14 | 0.69 |
| 2,3,3',4,4',5,5',6-Octachlorobiphenyl | -2.72 | -2.83 | 0.11 |
| 2,3,3',4,4',5,6-Heptachlorobiphenyl | -1.57 | -2.76 | 1.19 |
| 2,3,3',4,4',5',6-Heptachlorobiphenyl | -1.72 | -2.76 | 1.04 |
| 2,3,3',4,4',5-Hexabromodiphenyl ether | -3.57 | -4 | 0.43 |
| 2,3,3',4,4',5'-Hexachlorobiphenyl | -2.6 | -2.69 | 0.09 |
| 2,3,3',4,4',5-Hexachlorobiphenyl | -2.75 | -2.69 | -0.06 |
| 2,3,3',4,4',6-Hexachlorobiphenyl | -2.25 | -2.69 | 0.44 |
| 2,3,3',4,4'-Pentachlorobiphenyl | -2.64 | -2.62 | -0.02 |
| 2,3,3',4,4'-Pentachlorodiphenyl ether | -2.02 | -2.67 | 0.65 |
| 2,3,3',4',5,5',6-Heptachlorobiphenyl | -2.71 | -2.76 | 0.05 |
| 2,3,3',4,5,5'-Hexachlorobiphenyl | -3.09 | -2.69 | -0.40 |
| 2,3,3',4,5,6-Hexachlorobiphenyl | -3.09 | -2.69 | -0.40 |
| 2,3,3',4',5,6-Hexachlorobiphenyl | -3.21 | -2.69 | -0.52 |
| 2,3,3',4',6-Pentachlorobiphenyl | -2.84 | -2.62 | -0.22 |
| 2,3,3',4'-Tetrachlorobiphenyl | -2.99 | -2.55 | -0.44 |
| 2,3,3',5,5',6-Hexachlorobiphenyl | -2.93 | -2.69 | -0.24 |
| 2,3,3'-Trichlorobiphenyl | -2.18 | -2.48 | 0.30 |
| 2,3',4,4',5,5'-Hexachlorodiphenyl ether | -1.31 | -2.74 | 1.43 |
| 2,3,4,4',5,6-Hexachlorobiphenyl | -2.17 | -2.69 | 0.52 |
| 2,3',4,4',5-Pentachlorobiphenyl | -2.42 | -2.62 | 0.20 |
| 2,3',4,4',6-Pentachlorobiphenyl | -2.52 | -2.62 | 0.10 |
| 2,3',4,4'-Tetrabromodiphenyl ether | -3.7 | -3.44 | -0.26 |
| 2,3,4,4'-Tetrachlorobiphenyl | -2.18 | -2.55 | 0.37 |
| 2,3',4,4'-Tetrachlorobiphenyl | -2.31 | -2.55 | 0.24 |
| 2,3',4,4'-Tetrachlorodiphenyl ether | -1.79 | -2.6 | 0.81 |
| 2,3,4,5,6-Pentachlorobiphenyl | -2.45 | -2.62 | 0.17 |
| 2,3,4,5-Tetrachloroanisole | -1.21 | -1.96 | 0.75 |
| 2,3',4,5-Tetrachlorobiphenyl | -2.39 | -2.55 | 0.16 |
| 2,3,4',5-Tetrachlorobiphenyl | -1.75 | -2.55 | 0.80 |
| 2,3',4',5-Tetrachlorobiphenyl | -2.39 | -2.55 | 0.16 |
| 2,3,4,6,7,8-Hexachlorodibenzofuran | -3.29 | -3.6 | 0.31 |
| 2,3',4,6-Tetrabromodiphenyl ether | -3.39 | -3.44 | 0.05 |
| 2,3,4,6-Tetrachloroanisole | -1.13 | -1.98 | 0.85 |
| 2,3,4',6-Tetrachlorobiphenyl | -2.24 | -2.55 | 0.31 |
| 2,3,4,6-Tetrachlorophenol | -3.54 | -4.12 | 0.58 |
| 2,3,4,7,8-Pentachlorodibenzofuran | -3.28 | -3.49 | 0.21 |
| 2,3,4-Tribromoanisole | -1.39 | -2.54 | 1.15 |
| 2,3,4-Trichloroanisole | -1.51 | -1.89 | 0.38 |
| 2,3',4-Trichlorobiphenyl | -1.91 | -2.48 | 0.57 |
| 2,3,4'-Trichlorobiphenyl | -2.24 | -2.48 | 0.24 |
| 2,3',4'-Trichlorobiphenyl | -2.18 | -2.48 | 0.30 |
| 2,3,4-Trichlorobiphenyl | -2.44 | -2.48 | 0.04 |
| 2,3,4-Trimethylhexane | 2.36 | 1.71 | 0.65 |
| 2,3,4-Trimethylpentane | 1.88 | 1.56 | 0.32 |
| 2,3,5,6-Tetrachloroanisole | -0.9 | -1.96 | 1.06 |
| 2,3,5,6-Tetrachlorobiphenyl | -1.97 | -2.55 | 0.58 |
| 2,3,5,6-Tetrachloropyridine | -2.1 | -2.71 | 0.61 |
| 2,3',5'-Trichlorobiphenyl | -1.51 | -2.48 | 0.97 |
| 2,3',5-Trichlorobiphenyl | -2.09 | -2.48 | 0.39 |
| 2,3,5-Trichlorophenol | -3.52 | -4.06 | 0.54 |
| 2,3,6-Tribromoanisole | -1.37 | -2.54 | 1.17 |
| 2,3,6-Trichlorobiphenyl | -2.05 | -2.48 | 0.43 |
| 2,3',6-Trichlorobiphenyl | -1.83 | -2.51 | 0.68 |
| 2,3,6-Trichlorodiphenylether | -1.87 | -2.55 | 0.68 |
| 2,3,6-Trichlorotoluene | -1.21 | -1.39 | 0.18 |
| 2,3,6-Trimethylnaphthalene | -1.84 | -2.05 | 0.21 |
| 2,3,7,8-Tetrabromodibenzo-p-dioxin | -3.87 | -4.31 | 0.44 |
| 2,3,7,8-Tetrachlorodibenzofuran | -3.17 | -3.42 | 0.25 |
| 2,3,7,8-Tetrachlorodibenzo-p-dioxin | -3.35 | -3.47 | 0.12 |
| 2,3,7-Trichlorodibenzo-p-dioxin | -3.09 | -3.4 | 0.31 |
| 2,3,8-Trichlorodibenzofuran | -2.98 | -3.35 | 0.37 |
| 2,3-Butanedione | -3.39 | -3.93 | 0.54 |
| 2,3-Butyl dinitrate | -2.48 | -2.69 | 0.21 |
| 2,3-Butyleneglycol | -6.44 | -5.97 | -0.47 |
| 2,3-Dibromo-7,8-dichlorodibenzo-p-dioxin | -3.9 | -3.89 | -0.01 |
| 2,3-Dichloro-1.4-naphthoquinone | -5.03 | -5.38 | 0.35 |
| 2,3-Dichloroanisole | -1.74 | -1.82 | 0.08 |
| 2,3'-Dichlorobiphenyl | -1.87 | -2.41 | 0.54 |
| 2,3-Dichlorobiphenyl | -2.03 | -2.41 | 0.38 |
| 2,3-Dichlorobutane | -0.57 | -1.12 | 0.55 |
| 2,3-Dichlorodibenzofuran | -2.71 | -3.28 | 0.57 |
| 2,3-Dichlorodibenzo-p-dioxin | -2.82 | -3.33 | 0.51 |
| 2,3-Dichloronitrobenzene | -3.57 | -2.78 | -0.79 |
| 2,3-Dichlorophenol | -3.39 | -3.99 | 0.60 |
| 2,3-Dichloropropene | -0.77 | -0.48 | -0.29 |
| 2,3-Diethyl-5-methylpyrazine | -3.3 | -4.25 | 0.95 |
| 2,3-Dimethyl-1,3-butadiene | 0.29 | 0.36 | -0.07 |
| 2,3-Dimethylbutane | 1.7 | 1.09 | 0.61 |
| 2,3-Dimethylheptane | 2.34 | 1.57 | 0.77 |
| 2,3-Dimethylpentane | 1.85 | 1.27 | 0.58 |
| 2,3-Lutidine | -3.54 | -2.89 | -0.65 |
| 2,3-Naphthalenediol | -8.7 | -8 | -0.70 |
| 2,3-Xylenol | -4.52 | -3.98 | -0.54 |
| 2,3-Xylidine | -4.06 | -4.2 | 0.14 |
| 2,4,4',5-Tetrachlorobiphenyl | -2.39 | -2.55 | 0.16 |
| 2,4,4',5-Tetrachlorodiphenyl ether | -1.67 | -2.6 | 0.93 |
| 2,4,4',6-Tetrachlorobiphenyl | -1.77 | -2.55 | 0.78 |
| 2,4,4'-Tribromodiphenyl ether | -3.11 | -3.16 | 0.05 |
| 2,4,4'-Trichlorobiphenyl | -1.93 | -2.48 | 0.55 |
| 2,4,4'-Trichlorodiphenyl ether | -1.87 | -2.53 | 0.66 |
| 2,4,5-T | -6.45 | -6.07 | -0.38 |
| 2,4,5-Trichlorobiphenyl | -2.09 | -2.48 | 0.39 |
| 2,4',5-Trichlorobiphenyl | -2.11 | -2.48 | 0.37 |
| 2,4,5-Trichlorodiphenyl ether | -1.34 | -2.53 | 1.19 |
| 2,4',5-Trichlorodiphenyl ether | -2.6 | -2.53 | -0.07 |
| 2,4,5-Trichlorophenol | -3.21 | -4.05 | 0.84 |
| 2,4,5-Trichlorotoluene | -1.21 | -1.37 | 0.16 |
| 2,4,5-Trimethylaniline | -3.99 | -4.31 | 0.32 |
| 2,4,5-Trimethylnaphthalene | -2.22 | -1.96 | -0.26 |
| 2,4,6-Collidine | -3.37 | -2.58 | -0.79 |
| 2,4,6-Tribromo-3-chloroanisole | -1.35 | -2.61 | 1.26 |
| 2,4,6-Tribromoanisole | -1.68 | -2.54 | 0.86 |
| 2,4,6-Tribromodiphenyl ether | -2.93 | -3.16 | 0.23 |
| 2,4',6-Tribromodiphenyl ether | -2.6 | -3.16 | 0.56 |
| 2,4,6-Trichloroanisole | -1.76 | -1.89 | 0.13 |
| 2,4,6-Trichlorobiphenyl | -1.57 | -2.48 | 0.91 |
| 2,4',6-Trichlorobiphenyl | -1.47 | -2.48 | 1.01 |
| 2,4,6-Trichlorodibenzofuran | -2.94 | -3.35 | 0.41 |
| 2,4,6-Trichlorophenol | -3.3 | -4.05 | 0.75 |
| 2,4,6-Trichlorotoluene | -1.21 | -1.37 | 0.16 |
| 2,4,6-Trimethyloctane | 2.6 | 2.01 | 0.59 |
| 2,4,8-Trichlorodibenzofuran | -2.94 | -3.35 | 0.41 |
| 2,4-Dibromo-3,5-dichloroanisole | -1.35 | -2.4 | 1.05 |
| 2,4-Dibromo-5,6-dichloroanisole | -1.38 | -2.4 | 1.02 |
| 2,4-Dibromoanisole | -2.29 | -2.26 | -0.03 |
| 2,4'-Dibromodiphenyl ether | -2.16 | -2.88 | 0.72 |
| 2,4-Dibromodiphenyl ether | -2.23 | -2.88 | 0.65 |
| 2,4'-Dichlorobiphenyl | -1.94 | -2.41 | 0.47 |
| 2,4-Dichlorobiphenyl | -1.96 | -2.41 | 0.45 |
| 2,4-Dichlorodiphenyl ether | -2.67 | -2.46 | -0.21 |
| 2,4-Dichloronitrobenzene | -3.14 | -2.78 | -0.36 |
| 2,4-Dichlorophenol | -3.74 | -3.98 | 0.24 |
| 2,4-Dichlorophenoxyacetic acid | -7.58 | -6 | -1.58 |
| 2,4-Dichlorotoluene | -0.83 | -1.3 | 0.47 |
| 2,4-Dimethoxyaniline | -4.6 | -5.24 | 0.64 |
| 2,4-Dimethyl-3-pentanone | -2.01 | -1.69 | -0.32 |
| 2,4-Dimethylheptane | 2.29 | 1.57 | 0.72 |
| 2,4-Dimethylhexane | 2.16 | 1.42 | 0.74 |
| 2,4-Dimethylpentane | 1.99 | 1.27 | 0.72 |
| 2,4-Dinitrophenol | -5.37 | -6.93 | 1.56 |
| 2,4-Dinitrotoluene | -5.15 | -4.26 | -0.89 |
| 2,4-Lutidine | -3.56 | -2.9 | -0.66 |
| 2,4-Xylenol | -4.41 | -3.98 | -0.43 |
| 2,4-Xylidine | -3.81 | -4.23 | 0.42 |
| 2,5-Aldehydine | -3.11 | -2.89 | -0.22 |
| 2,5-Dichlorobiphenyl | -1.76 | -2.41 | 0.65 |
| 2,5-Dimethyl-2,4-hexadiene | 0.28 | 0.06 | 0.22 |
| 2,5-Dimethylheptane | 2.3 | 1.57 | 0.73 |
| 2,5-Dimethylhexane | 2.17 | 1.42 | 0.75 |
| 2,5-Dimethylpyrazine | -4.25 | -4.53 | 0.28 |
| 2,5-Dinitrophenol | -5.5 | -4.92 | -0.58 |
| 2,5-Dinitrotoluene | -5.07 | -4.3 | -0.77 |
| 2,5-Furandione | -5.71 | -4.23 | -1.48 |
| 2,5-Hexanediol | -6.1 | -5.99 | -0.11 |
| 2,5-Hexyl dinitrate | -2.89 | -2.67 | -0.22 |
| 2,5-Lutidine | -3.46 | -2.89 | -0.57 |
| 2,5-Xylenol | -4.34 | -3.98 | -0.36 |
| 2,5-Xylidine | -3.79 | -4.2 | 0.41 |
| 2,6-Dibromo-3,4,5-trichloroanisole | -1.33 | -2.47 | 1.14 |
| 2,6-Dibromo-3-chloroanisole | -1.29 | -2.31 | 1.02 |
| 2,6-Dibromo-4-chloroanisole | -1.44 | -2.33 | 0.89 |
| 2,6-Dibromoanisole | -1.95 | -2.26 | 0.31 |
| 2,6-Dibromodiphenyl ether | -2.31 | -2.88 | 0.57 |
| 2,6-Dichloro-4-nitroaniline | -5.46 | -5.77 | 0.31 |
| 2,6-Dichloroanisole | -1.34 | -1.82 | 0.48 |
| 2,6-Dichlorobenzonitrile | -3.08 | -3.07 | -0.01 |
| 2,6-Dichlorobiphenyl | -1.9 | -2.41 | 0.51 |
| 2,6-Dichlorodiphenyl ether | -2.09 | -2.46 | 0.37 |
| 2,6-Dichlorophenol | -3.36 | -3.98 | 0.62 |
| 2,6-Dichlorosyringaldehyde | -5.83 | -7.29 | 1.46 |
| 2,6-Dichlorotoluene | -1.07 | -1.3 | 0.23 |
| 2,6-Diethylaniline | -3.5 | -4.23 | 0.73 |
| 2,6-Diisopropylnaphthalene | -1.47 | -1.42 | -0.05 |
| 2,6-Dimethoxyphenol | -5.09 | -5.02 | -0.07 |
| 2,6-Dimethylheptan-4-one | -1.87 | -1.69 | -0.18 |
| 2,6-Dimethylheptane | 2.32 | 1.57 | 0.75 |
| 2,6-Dimethylnaphthalene | -1.93 | -2.03 | 0.10 |
| 2,6-Dimethyl-N-nitrosomorpholine | -4.96 | -5.11 | 0.15 |
| 2,6-Dimethylpyrazine | -3.38 | -4.53 | 1.15 |
| 2,6-Dinitro-4-methylphenol | -5.57 | -5.05 | -0.52 |
| 2,6-Dinitrotoluene | -5.05 | -4.26 | -0.79 |
| 2,6-Lutidine | -3.37 | -2.51 | -0.86 |
| 2,6-Xylenol | -3.86 | -3.98 | 0.12 |
| 2,6-Xylidine | -3.82 | -4.23 | 0.41 |
| 2,7-Dichlorodibenzofuran | -2.7 | -3.28 | 0.58 |
| 2,7-Dichlorodibenzo-p-dioxin | -2.8 | -3.33 | 0.53 |
| 2,7-Dichloronaphthalene | -1.89 | -2.63 | 0.74 |
| 2,7-Dimethylnaphthalene | -1.69 | -1.94 | 0.25 |
| 2,7-Dimethyloctane | 2.53 | 1.72 | 0.81 |
| 2,8-Dichlorodibenzofuran | -2.71 | -3.28 | 0.57 |
| 2,8-Dichlorodibenzo-p-dioxin | -2.8 | -3.33 | 0.53 |
| 2.5-Dichloronitrobenzene | -3.31 | -2.78 | -0.53 |
| 2-Aminoanthraquinone | -8.43 | -9.93 | 1.50 |
| 2-Anisaldehyde | -4.37 | -3.84 | -0.53 |
| 2-Bromo-3,4,5-trichloroanisole | -1.39 | -2.19 | 0.80 |
| 2-Bromo-3,5-dichloroanisole | -1.44 | -2.12 | 0.68 |
| 2-Bromo-3,6-dichloroanisole | -1.25 | -2.1 | 0.85 |
| 2-Bromo-4-chloroanisole | -1.65 | -2.05 | 0.40 |
| 2-Bromo-6-chloroanisole | -1.53 | -2.05 | 0.52 |
| 2-Bromoanisole | -1.86 | -1.96 | 0.10 |
| 2-Bromobutane | -0.33 | -0.55 | 0.22 |
| 2-Bromoisopropylbenzene | -0.62 | -1.29 | 0.67 |
| 2-Bromonaphthalene | -2.03 | -2.78 | 0.75 |
| 2-Bromopropane | -0.35 | -0.55 | 0.20 |
| 2-Bromotoluene | -1.01 | -1.44 | 0.43 |
| 2-Butanol | -3.37 | -3.1 | -0.27 |
| 2-Butanone | -2.63 | -1.98 | -0.65 |
| 2-Butylamine | -3 | -2.93 | -0.07 |
| 2-Chloro-1,1-dimethoxyethane | -2.9 | -3.4 | 0.50 |
| 2-Chloro-2-methylbutane | 0.12 | 0.23 | -0.11 |
| 2-Chloro-2-methylpropane | 0.01 | 0.15 | -0.14 |
| 2-Chloro-4-nitroaniline | -6.41 | -5.7 | -0.71 |
| 2-Chloro-6-(trichloromethyl)pyridine | -3.25 | -2.89 | -0.36 |
| 2-Chloroaniline | -3.6 | -4.13 | 0.53 |
| 2-Chloroanisole | -2.42 | -1.75 | -0.67 |
| 2-Chlorobiphenyl | -1.87 | -2.34 | 0.47 |
| 2-Chlorobutane | -0.01 | -0.59 | 0.58 |
| 2-Chlorodibenzofuran | -2.38 | -3.21 | 0.83 |
| 2-Chlorodibenzo-p-dioxin | -2.51 | -3.26 | 0.75 |
| 2-Chlorodiphenyl ether | -1.89 | -2.39 | 0.50 |
| 2-Chloroethanol | -4.27 | -4.12 | -0.15 |
| 2-Chloroethyl vinyl ether | -1.48 | -1.08 | -0.40 |
| 2-Chloronaphthalene | -1.87 | -2.56 | 0.69 |
| 2-Chloronitrobenzene | -2.74 | -2.71 | -0.03 |
| 2-Chloropentane | 0.05 | -0.59 | 0.64 |
| 2-Chlorophenol | -3.34 | -3.91 | 0.57 |
| 2-Chloropropane | -0.15 | -0.57 | 0.42 |
| 2-Chloropyridine | -3.22 | -2.83 | -0.39 |
| 2-Chlorosyringaldehyde | -5.35 | -7.22 | 1.87 |
| 2-Chlorotoluene | -0.77 | -1.23 | 0.46 |
| 2-Decanone | -1.72 | -1.92 | 0.20 |
| 2-Ethoxyethanol | -4.72 | -4.59 | -0.13 |
| 2-Ethoxyethylacetate | -3.87 | -3.26 | -0.61 |
| 2-Ethyl-2-hexenal | -2.04 | -2.3 | 0.26 |
| 2-Ethyl-3-methoxypyrazine | -3.22 | -3.99 | 0.77 |
| 2-Ethyl-6-methylaniline | -3.62 | -4.23 | 0.61 |
| 2-Ethylaniline | -3.81 | -4.12 | 0.31 |
| 2-Ethylbutanoic acid | -4.19 | -4.19 | 0.00 |
| 2-Ethylhexanal | -1.38 | -1.93 | 0.55 |
| 2-Ethylhexanoic acid | -3.74 | -4.17 | 0.43 |
| 2-Ethylhexyl acetate | -1.93 | -1.94 | 0.01 |
| 2-Ethylhexyl acrylate | -1.3 | -1.94 | 0.64 |
| 2-Ethylhexylamine | -2.41 | -3.08 | 0.67 |
| 2-Ethylnaphthalene | -1.66 | -1.95 | 0.29 |
| 2-Ethylpyridine | -3.17 | -2.8 | -0.37 |
| 2-Ethyltoluene | -0.65 | -0.77 | 0.12 |
| 2-Fluoroaniline | -3.53 | -3.86 | 0.33 |
| 2-Fluoroethanol | -2.9 | -3.26 | 0.36 |
| 2-Fluorophenol | -3.88 | -3.64 | -0.24 |
| 2-Heptanol | -2.86 | -3.07 | 0.21 |
| 2-Heptanone | -2.23 | -1.95 | -0.28 |
| 2-Heptenal | -2.56 | -2.32 | -0.24 |
| 2-Heptyne | 0.36 | -0.6 | 0.96 |
| 2-Hydroxy-3-butyl nitrate | -5.39 | -4.43 | -0.96 |
| 2-Hydroxyacetophenone | -3.39 | -3.83 | 0.44 |
| 2-Hydroxyanthraquinone | -9.05 | -9.7 | 0.65 |
| 2-Hydroxybenzaldehyde | -3.14 | -3.95 | 0.81 |
| 2-Hydroxyethylmethacrylate | -5.06 | -5.4 | 0.34 |
| 2-Iodophenol | -4.55 | -4.66 | 0.11 |
| 2-Isobutyl-3-methoxypyrazine | -2.7 | -3.83 | 1.13 |
| 2-Isopropoxyethanol | -4.43 | -4.33 | -0.10 |
| 2-Isopropyl-5-methylphenol | -3.82 | -3.83 | 0.01 |
| 2-Isopropylaniline | -3.57 | -4.01 | 0.44 |
| 2-Isopropylnaphthalene | -1.26 | -1.66 | 0.40 |
| 2-Isopropyltoluene | -0.6 | -0.58 | -0.02 |
| 2-Methoxyacetophenone | -4.6 | -3.69 | -0.91 |
| 2-Methoxyaniline | -4.24 | -4.65 | 0.41 |
| 2-Methoxyethyl acetate | -4.05 | -3.42 | -0.63 |
| 2-Methoxyethylamine | -4.79 | -4.59 | -0.20 |
| 2-Methoxynitrobenzene | -3.79 | -3.23 | -0.56 |
| 2-Methoxy-p-cresol | -4.25 | -4.52 | 0.27 |
| 2-Methoxyphenol | -4.09 | -4.43 | 0.34 |
| 2-Methyl valeraldehyde | -1.67 | -1.95 | 0.28 |
| 2-Methyl-1-pentene | 1.08 | 0.33 | 0.75 |
| 2-Methyl-1-propanol | -3.31 | -3.25 | -0.06 |
| 2-Methyl-2-butanol | -3.25 | -3.07 | -0.18 |
| 2-Methyl-2-propanol | -3.29 | -3.08 | -0.21 |
| 2-Methyl-3-hexyne | 0.27 | -0.46 | 0.73 |
| 2-Methyl-5-vinylpyridine | -3.75 | -2.88 | -0.87 |
| 2-Methyl-6-nitrophenol | -2.72 | -3.44 | 0.72 |
| 2-Methylacrylonitrile | -2.06 | -1.8 | -0.26 |
| 2-Methylbenzaldehyde | -2.87 | -3.3 | 0.43 |
| 2-Methylbutyraldehyde | -1.76 | -1.96 | 0.20 |
| 2-Methylbutyric acid | -4.22 | -4.21 | -0.01 |
| 2-Methylfuran | -0.57 | -0.92 | 0.35 |
| 2-Methylheptane | 2.15 | 1.28 | 0.87 |
| 2-Methylhexane | 2.11 | 1.13 | 0.98 |
| 2-Methylnaphthalene | -1.89 | -2.01 | 0.12 |
| 2-Methylpentane | 1.84 | 0.98 | 0.86 |
| 2-Methylpropanal | -2.1 | -1.97 | -0.13 |
| 2-Methylpropane | 1.65 | 0.66 | 0.99 |
| 2-Methylpropanoic acid | -4.44 | -4.21 | -0.23 |
| 2-Methylpropenoic acid | -4.8 | -4.34 | -0.46 |
| 2-Methylpyrazine | -4.05 | -4.83 | 0.78 |
| 2-Methylquinoline | -4.53 | -3.71 | -0.82 |
| 2-Methyltetrahydrofuran | -2.42 | -1.76 | -0.66 |
| 2-Methylthiophene | -1.01 | -1.08 | 0.07 |
| 2-Naphthol | -5.95 | -5.24 | -0.71 |
| 2-Naphthoxyacetic acid | -8.94 | -7.26 | -1.68 |
| 2-Naphthylamine | -5.48 | -5.46 | -0.02 |
| 2-n-Hexoxyethanol | -3.91 | -4.62 | 0.71 |
| 2-Nitroaniline | -4.77 | -3.59 | -1.18 |
| 2-Nitrooxyethanol | -5.98 | -5.01 | -0.97 |
| 2-Nitrophenol | -3.36 | -3.37 | 0.01 |
| 2-Nitrotoluene | -2.63 | -2.71 | 0.08 |
| 2-Nonanone | -1.9 | -1.93 | 0.03 |
| 2-Nonenal | -2.36 | -2.32 | -0.04 |
| 2-Octanol | -2.82 | -3.06 | 0.24 |
| 2-Octanone | -2.11 | -1.94 | -0.17 |
| 2-Pentyl nitrate | -0.91 | -1.35 | 0.44 |
| 2-Phenoxyethanol | -4.88 | -4.9 | 0.02 |
| 2-Picoline | -3.39 | -2.81 | -0.58 |
| 2-Propanol | -3.47 | -3.11 | -0.36 |
| 2-Propynyl-(2E,4E)-3,7,11-trimethyl-2,4-dodecadienoate | -2.65 | -2.8 | 0.15 |
| 2-s-Butylphenol | -3.47 | -3.75 | 0.28 |
| 2-Tolunitrile | -3.28 | -3 | -0.28 |
| 2-Undecanone | -1.67 | -1.91 | 0.24 |
| 3-(Chloromethyl)heptane | 0.61 | -0.58 | 1.19 |
| 3,3',4,4',5,5'-Hexachlorobiphenyl | -2.99 | -2.69 | -0.30 |
| 3,3',4,4',5-Pentabromodiphenyl ether | -3.14 | -3.72 | 0.58 |
| 3,3',4,4',5-Pentachlorodiphenyl ether | -1.39 | -2.67 | 1.28 |
| 3,3',4,4'-Tetrabromodiphenyl ether | -3.31 | -3.44 | 0.13 |
| 3,3',4,4'-Tetrachlorobiphenyl | -2.75 | -2.55 | -0.20 |
| 3,3',4,4'-Tetrachlorodiphenyl ether | -2.01 | -2.6 | 0.59 |
| 3,3',4,5'-Tetrachlorobiphenyl | -2.43 | -2.58 | 0.15 |
| 3,3',4-Tribromodiphenyl ether | -2.47 | -3.16 | 0.69 |
| 3,3',5,5'-Tetrachlorobiphenyl | -1.99 | -2.55 | 0.56 |
| 3,3',5-Trichlorobiphenyl | -2.16 | -2.48 | 0.32 |
| 3,3'-Dichlorobiphenyl | -2.02 | -2.41 | 0.39 |
| 3,3-Dimethylheptane | 2.34 | 1.76 | 0.58 |
| 3,3-Dimethylpentane | 1.88 | 1.46 | 0.42 |
| 3,4,4'-Tribromodiphenyl ether | -2.35 | -3.16 | 0.81 |
| 3,4,4'-Trichlorobiphenyl | -2.39 | -2.48 | 0.09 |
| 3,4,5,6-Tetrachloroguaiacol | -3.39 | -4.71 | 1.32 |
| 3,4,5-Trichlorocatechol | -5.78 | -6.8 | 1.02 |
| 3,4,5-Trichloroguaiacol | -4.32 | -4.64 | 0.32 |
| 3,4,5-Trichloroveratrole | -2.82 | -2.48 | -0.34 |
| 3,4'-Dibromodiphenyl ether | -2.13 | -2.88 | 0.75 |
| 3,4-Dibromodiphenyl ether | -1.91 | -2.88 | 0.97 |
| 3,4-Dichloro-1-butene | -1.15 | -1.3 | 0.15 |
| 3,4-Dichloroaniline | -4.48 | -4.2 | -0.28 |
| 3,4'-Dichlorobiphenyl | -2.17 | -2.41 | 0.24 |
| 3,4-Dichlorobiphenyl | -2.24 | -2.41 | 0.17 |
| 3,4-Dichloronitrobenzene | -3.48 | -2.78 | -0.70 |
| 3,4-Dichlorotoluene | -0.97 | -1.3 | 0.33 |
| 3,4-Dimethylhexane | 2.22 | 1.42 | 0.80 |
| 3,4-Dimethylphenyl N-methylcarbamate | -5.35 | -5.9 | 0.55 |
| 3,4-Lutidine | -3.83 | -3.27 | -0.56 |
| 3,4-Xylenol | -4.77 | -3.98 | -0.79 |
| 3,4-Xylidine | -4.12 | -4.2 | 0.08 |
| 3,5-Dibromo-4-hydroxybenzonitrile | -6.38 | -6.24 | -0.14 |
| 3,5-Dichloroanisole | -0.97 | -1.84 | 0.87 |
| 3,5-Dichlorobiphenyl | -1.89 | -2.41 | 0.52 |
| 3,5-Dichlorophenol | -4.86 | -3.97 | -0.89 |
| 3,5-Dimethylheptane | 2.29 | 1.57 | 0.72 |
| 3,5-Lutidine | -3.55 | -3.27 | -0.28 |
| 3,5-Xylenol | -4.6 | -3.98 | -0.62 |
| 3,6-Dichlorodibenzofuran | -2.72 | -3.28 | 0.56 |
| 3,6-Dichloropicolinic acid | -6.91 | -6.91 | 0.00 |
| 3-Acetylpyridine | -6.06 | -5.12 | -0.94 |
| 3-Anisaldehyde | -4.07 | -3.84 | -0.23 |
| 3-Bromo-1-propanol | -5.08 | -4.37 | -0.71 |
| 3-Bromoanisole | -1.39 | -1.98 | 0.59 |
| 3-Bromonitrobenzene | -4.12 | -2.92 | -1.20 |
| 3-Bromopropyne | -1.34 | -1.66 | 0.32 |
| 3-Bromopyridine | -3.32 | -3.39 | 0.07 |
| 3-Bromotoluene | -0.57 | -1.44 | 0.87 |
| 3-Buten-2-one | -3 | -1.96 | -1.04 |
| 3-Carene | 0.15 | -0.36 | 0.51 |
| 3-Chloro-1-butene | -0.14 | -0.58 | 0.44 |
| 3-Chloro-1-propanol | -4.51 | -4.11 | -0.40 |
| 3-Chloro-2-butanone | -2.37 | -2.51 | 0.14 |
| 3-Chloro-4-methylaniline | -4.14 | -4.22 | 0.08 |
| 3-Chloroaniline | -4.27 | -4.13 | -0.14 |
| 3-Chloroanisole | -2.06 | -1.75 | -0.31 |
| 3-Chlorobiphenyl | -1.93 | -2.34 | 0.41 |
| 3-Chlorodibenzofuran | -2.38 | -3.21 | 0.83 |
| 3-Chloronitrobenzene | -3.54 | -2.71 | -0.83 |
| 3-Chloropentane | 0.05 | -0.59 | 0.64 |
| 3-Chlorophenol | -4.85 | -3.91 | -0.94 |
| 3-Chloropyridine | -2.94 | -3.18 | 0.24 |
| 3-Chlorotoluene | -0.83 | -1.23 | 0.40 |
| 3-Cyanophenol | -6.97 | -5.67 | -1.30 |
| 3-Ethylheptane | 2.33 | 1.43 | 0.90 |
| 3-Ethylhexane | 2.24 | 1.28 | 0.96 |
| 3-Ethylphenol | -4.59 | -3.9 | -0.69 |
| 3-Ethylpyridine | -3.37 | -3.19 | -0.18 |
| 3-Heptanol | -2.91 | -3.07 | 0.16 |
| 3-Heptanone | -2.31 | -1.95 | -0.36 |
| 3-Hexyne | -0.13 | -0.66 | 0.53 |
| 3-Hydroxybenzaldehyde | -6.99 | -5.99 | -1.00 |
| 3-Isopropylbiphenyl | -1.16 | -1.34 | 0.18 |
| 3-Isopropylhexane | 2.34 | 1.57 | 0.77 |
| 3-Isopropyltoluene | -0.53 | -0.52 | -0.01 |
| 3-Methoxy-4-hydroxybenzaldehyde | -6.4 | -6.57 | 0.17 |
| 3-Methoxyacetophenone | -4.64 | -3.69 | -0.95 |
| 3-Methoxyphenol | -5.63 | -4.43 | -1.20 |
| 3-Methyl-1-butene | 1.34 | 0.39 | 0.95 |
| 3-Methyl-2-butanol | -3.13 | -2.96 | -0.17 |
| 3-Methyl-2-butanone | -2.38 | -1.84 | -0.54 |
| 3-Methyl-2-nitrophenol | -3.8 | -3.49 | -0.31 |
| 3-Methyl-2-pentanone | -2.28 | -1.83 | -0.45 |
| 3-Methyl-4-nitrophenol | -6 | -5.49 | -0.51 |
| 3-Methylbenzaldehyde | -2.9 | -3.32 | 0.42 |
| 3-Methylbutanoic acid | -4.47 | -4.2 | -0.27 |
| 3-Methylbutyl nitrate | -1.05 | -1.52 | 0.47 |
| 3-Methylheptane | 2.12 | 1.28 | 0.84 |
| 3-Methylhexane | 1.99 | 1.13 | 0.86 |
| 3-Methylnonane | 2.39 | 1.58 | 0.81 |
| 3-Methylpentane | 1.83 | 0.96 | 0.87 |
| 3-Methylpyridine | -3.5 | -3.18 | -0.32 |
| 3-Methylstyrene | -0.87 | -0.78 | -0.09 |
| 3-Methyltetrahydropyran | -2.09 | -1.93 | -0.16 |
| 3-Methylthiophene | -0.53 | -0.55 | 0.02 |
| 3-Nitroaniline | -6.49 | -5.61 | -0.88 |
| 3-Nitrophenol | -7.05 | -5.38 | -1.67 |
| 3-Nitrotoluene | -2.84 | -2.71 | -0.13 |
| 3-Octanone | -2.06 | -1.97 | -0.09 |
| 3-Pentanol | -3.19 | -3.09 | -0.10 |
| 3-Pentyl nitrate | -0.95 | -1.35 | 0.40 |
| 3-Propyltoluene | -0.26 | -0.66 | 0.40 |
| 3-Pyridinecarbonitrile | -4.95 | -4.95 | 0.00 |
| 3-Pyridinecarboxaldehyde | -5.21 | -5.25 | 0.04 |
| 3-Trifluoromethylaniline | -2.98 | -3.57 | 0.59 |
| 4-(2,4-Dichlorophenoxy)butyric acid | -6.83 | -5.98 | -0.85 |
| 4,4'-Bipyridine | -6.75 | -6.32 | -0.43 |
| 4,4'-Dibromodiphenyl ether | -2.78 | -2.88 | 0.10 |
| 4,4'-Dichlorobiphenyl | -2.07 | -2.41 | 0.34 |
| 4,4-Diethylheptane | 2.62 | 2.04 | 0.58 |
| 4,4-Dimethylheptane | 2.34 | 1.76 | 0.58 |
| 4,5,6-Trichloroguaiacol | -2.96 | -4.64 | 1.68 |
| 4,5-Dichlorocatechol | -6.5 | -6.72 | 0.22 |
| 4,5-Dichloroguaiacol | -3.75 | -4.57 | 0.82 |
| 4,6-Dinitro-o-cresol | -4.9 | -4.99 | 0.09 |
| 4-Acetylanisole | -4.68 | -3.69 | -0.99 |
| 4-Acetylpyridine | -5.59 | -5.12 | -0.47 |
| 4-Allyl-2-methoxyphenol | -4.1 | -4.49 | 0.39 |
| 4-Amino-2,6-dinitrotoluene | -7.26 | -7.27 | 0.01 |
| 4-Amino-3,5,6-trichloro-2-pyridinecarboxlic acid | -9.95 | -9.95 | 0.00 |
| 4-Amino-4'-nitroazobenzene | -8.14 | -8.99 | 0.85 |
| 4-Aminopyridine | -8.02 | -6.07 | -1.95 |
| 4-Bromo-2,3,5,6-tetrachloroanisole | -1.36 | -2.26 | 0.90 |
| 4-Bromo-2,6-dichloroanisole | -1.47 | -2.12 | 0.65 |
| 4-Bromo-2-chloroanisole | -1.5 | -2.05 | 0.55 |
| 4-Bromoanisole | -1.42 | -1.98 | 0.56 |
| 4-Bromobiphenyl | -2.14 | -2.55 | 0.41 |
| 4-Bromodiphenyl ether | -2.09 | -2.61 | 0.52 |
| 4-Bromoiodobenzene | -1.56 | -2.2 | 0.64 |
| 4-Bromophenol | -5.23 | -4.12 | -1.11 |
| 4-Bromotoluene | -0.95 | -1.44 | 0.49 |
| 4-Carboxyphenol | -9.54 | -8.22 | -1.32 |
| 4-Chloro-2-methylphenol | -4.33 | -3.98 | -0.35 |
| 4-Chloro-2-nitrophenol | -3.29 | -3.44 | 0.15 |
| 4-Chloro-6-nitro-m-cresol | -2.95 | -3.51 | 0.56 |
| 4-Chloroaniline | -4.33 | -4.13 | -0.20 |
| 4-Chloroanisole | -2.13 | -1.75 | -0.38 |
| 4-Chloroazobenzene | -4.26 | -4.53 | 0.27 |
| 4-Chlorobiphenyl | -2.01 | -2.34 | 0.33 |
| 4-Chlorodiphenyl ether | -2.44 | -2.39 | -0.05 |
| 4-Chloroiodobenzene | -1.23 | -1.99 | 0.76 |
| 4-Chloro-m-cresol | -4 | -3.98 | -0.02 |
| 4-Chloronitrobenzene | -3.2 | -2.71 | -0.49 |
| 4-Chlorophenol | -5.16 | -3.91 | -1.25 |
| 4-Chlorotoluene | -0.86 | -1.23 | 0.37 |
| 4-Cyanopyridine | -4.42 | -4.95 | 0.53 |
| 4-Ethyl-2-methylhexane | 2.3 | 1.57 | 0.73 |
| 4-Ethylaniline | -3.8 | -4.12 | 0.32 |
| 4-Ethylheptane | 2.31 | 1.43 | 0.88 |
| 4-Ethylphenol | -4.5 | -3.9 | -0.60 |
| 4-Ethylpyridine | -3.46 | -3.17 | -0.29 |
| 4-Ethyltoluene | -0.7 | -0.77 | 0.07 |
| 4-Fluoroaniline | -3.76 | -3.86 | 0.10 |
| 4-Fluoroiodobenzene | -1.05 | -1.72 | 0.67 |
| 4-Fluorophenol | -4.54 | -3.64 | -0.90 |
| 4-Heptanol | -2.94 | -3.07 | 0.13 |
| 4-Heptanone | -2.14 | -1.95 | -0.19 |
| 4-Hydroxy-3-nitrobenzaldehyde | -4.19 | -5.54 | 1.35 |
| 4-Hydroxy-4'-nitroazobenzene | -9 | -8.76 | -0.24 |
| 4-Hydroxyazobenzene | -7.56 | -7.21 | -0.35 |
| 4-Hydroxybenzaldehyde | -7.68 | -5.98 | -1.70 |
| 4-Hydroxybenzonitrile | -7.46 | -5.67 | -1.79 |
| 4-Iodophenol | -5.33 | -4.66 | -0.67 |
| 4-Isopropylbiphenyl | -1.02 | -1.34 | 0.32 |
| 4-Methoxy-2-nitrophenol | -3.95 | -4.01 | 0.06 |
| 4-Methoxyaniline | -5.49 | -4.65 | -0.84 |
| 4-Methoxybenzaldehyde | -4.77 | -3.82 | -0.95 |
| 4-Methyl-1-pentene | 1.4 | 0.45 | 0.95 |
| 4-Methyl-2-nitrophenol | -3.05 | -3.49 | 0.44 |
| 4-Methylacetophenone | -3.45 | -3.17 | -0.28 |
| 4-Methylbenzaldehyde | -3.08 | -3.32 | 0.24 |
| 4-Methylcyclohexanone | -3.25 | -2.6 | -0.65 |
| 4-Methylheptane | 2.18 | 1.28 | 0.90 |
| 4-Methylnonane | 2.42 | 1.58 | 0.84 |
| 4-Methyloctane | 2.61 | 1.43 | 1.18 |
| 4-Methylpent-3-en-2-one | -2.82 | -2.15 | -0.67 |
| 4-Methylpyridine | -3.62 | -3.18 | -0.44 |
| 4-Methylstyrene | -0.89 | -0.78 | -0.11 |
| 4-Nitroaniline | -7.29 | -5.61 | -1.68 |
| 4-Nitroanisole | -4.09 | -3.23 | -0.86 |
| 4-Nitroazobenzene | -4.65 | -6.02 | 1.37 |
| 4-Nitrooxy-1-butanol | -5.75 | -5.01 | -0.74 |
| 4-Nitrooxy-2-butanol | -5.26 | -4.72 | -0.54 |
| 4-Nitrotoluene | -2.57 | -2.71 | 0.14 |
| 4-Nonylphenol | -3.8 | -3.83 | 0.03 |
| 4-Octanol | -2.74 | -3.06 | 0.32 |
| 4-Phenylcyclohexene | -1.29 | -1.26 | -0.03 |
| 4-Propyloctane | 2.6 | 1.73 | 0.87 |
| 4-Propylphenol | -3.62 | -3.89 | 0.27 |
| 4-Pyridinecarboxaldehyde | -5.14 | -5.25 | 0.11 |
| 4-s-Butyl-2-nitrophenol | -2.3 | -3.35 | 1.05 |
| 4-t-Butylphenol | -4.31 | -3.42 | -0.89 |
| 4-t-Butylphenyl diphenyl phosphate | -4.44 | -5.43 | 0.99 |
| 4-t-Butylpyridine | -3.27 | -2.71 | -0.56 |
| 4-t-Butyltoluene | -0.29 | -0.19 | -0.10 |
| 4-Vinylcyclohexene | 0.26 | -0.37 | 0.63 |
| 4-Vinylpyridine | -3.4 | -3.18 | -0.22 |
| 5-Ethylidene-2-norbornene | -0.32 | -1.04 | 0.72 |
| 5-Fluoro-2-nitrophenol | -2.94 | -3.21 | 0.27 |
| 5-Hydroxypentyl nitrate | -5.7 | -4.98 | -0.72 |
| 5-Isopropyl-2-methylphenol | -3.78 | -3.87 | 0.09 |
| 5-Methyl-2-nitrophenol | -3.12 | -3.49 | 0.37 |
| 5-Methyl-3-heptanone | -2.09 | -1.83 | -0.26 |
| 5-Nonanone | -1.94 | -1.93 | -0.01 |
| 6-Bromo-2,3,4-trichloroanisole | -1.42 | -2.19 | 0.77 |
| 6-Undecanone | -1.85 | -1.97 | 0.12 |
| 9,10-Anthraquinone | -6.02 | -6.96 | 0.94 |
| 9,10-Dihydrophenanthrene | -2.44 | -2.32 | -0.12 |
| 9H-Fluoren-9-one | -4.43 | -5.03 | 0.60 |
| 9-Methyl-9H-fluorene | -2.67 | -2.16 | -0.51 |
| Abate | -5.46 | -6.15 | 0.69 |
| Acenaphthene | -2.59 | -2.72 | 0.13 |
| Acenaphthylene | -2.67 | -2.91 | 0.24 |
| Acetaldehyde | -2.51 | -2.12 | -0.39 |
| Acetamide | -7.13 | -5.79 | -1.34 |
| Acetic acid | -5 | -4.36 | -0.64 |
| Acetic anhydride | -3.63 | -3.35 | -0.28 |
| Acetochlor | -5.75 | -5.08 | -0.67 |
| Acetol | -5.29 | -5.32 | 0.03 |
| Acetonitrile | -2.85 | -1.82 | -1.03 |
| Acetophenone | -3.46 | -3.1 | -0.36 |
| Acetylacetone | -3.85 | -3.92 | 0.07 |
| Aclonifen | -5.66 | -4.94 | -0.72 |
| Acrinathrin | -4.9 | -6.71 | 1.81 |
| Acrylic acid | -4.89 | -4.36 | -0.53 |
| Acticin | -5.45 | -4.76 | -0.69 |
| Alachlor | -5.47 | -5.18 | -0.29 |
| Aldicarb | -7 | -8.47 | 1.47 |
| Aldrin | -2.22 | -2.11 | -0.11 |
| Allyl acetate | -2.15 | -2.07 | -0.08 |
| Allyl bromide | -0.62 | -1.03 | 0.41 |
| Allyl chloride | -0.42 | -0.77 | 0.35 |
| Allyl cyanide | -2.69 | -1.81 | -0.88 |
| Allyl glycidyl ether | -3.71 | -2.92 | -0.79 |
| Allyl methacrylate | -2.01 | -2.04 | 0.03 |
| Allyl methyl sulfide | -1.02 | -1.42 | 0.40 |
| Allylacetoacetate | -4.49 | -3.99 | -0.50 |
| Allylamine | -3.4 | -3.27 | -0.13 |
| alpha-Farnesene | 0.08 | 0.31 | -0.23 |
| alpha-Hexachlorocyclohexane | -4.13 | -4.04 | -0.09 |
| alpha-Humulene | 0.14 | 0.03 | 0.11 |
| alpha-Methylstyrene | -0.91 | -0.69 | -0.22 |
| alpha-Neoclovene | 0.14 | -0.12 | 0.26 |
| alpha-Phellandrene | 0.35 | -0.26 | 0.61 |
| alpha-Pinene | 0.74 | -0.43 | 1.17 |
| alpha-Terpinene | -0.15 | -0.45 | 0.30 |
| alpha-Terpineol | -4.04 | -3.92 | -0.12 |
| Altosid | -3.56 | -3.09 | -0.47 |
| Ametryn | -6.74 | -6.61 | -0.13 |
| Amicarbazone | -10.25 | -9.43 | -0.82 |
| Aminocarb | -6.85 | -7.63 | 0.78 |
| Aminocyclopyrachlor | -10.5 | -11.26 | 0.76 |
| Amitraz | -4.5 | -5.86 | 1.36 |
| Amyl acetate | -1.84 | -2.04 | 0.20 |
| Amyl propionate | -1.67 | -2.03 | 0.36 |
| Amylamine | -3 | -3.24 | 0.24 |
| Amylbenzene | -0.17 | -0.57 | 0.40 |
| Ancymidol | -9.78 | -9.71 | -0.07 |
| Anethole | -2.4 | -1.98 | -0.42 |
| Aniline | -4.03 | -4.06 | 0.03 |
| Anisole | -1.86 | -1.68 | -0.18 |
| Anthracene | -3.1 | -3.19 | 0.09 |
| Antor | -6.29 | -6.93 | 0.64 |
| Arabitol | -15.22 | -15.18 | -0.04 |
| Arbanol | -3.43 | -4.72 | 1.29 |
| Atratone | -7.41 | -6.44 | -0.97 |
| Atrazine | -6.54 | -6.28 | -0.26 |
| Azaconazole | -8.1 | -6.26 | -1.84 |
| Azepane | -3.6 | -3.2 | -0.40 |
| Azetidine | -4.08 | -3.14 | -0.94 |
| Bayleton | -8.48 | -7.09 | -1.39 |
| Beflubutamid | -7.35 | -7.07 | -0.28 |
| Bendiocarb | -5.63 | -5.66 | 0.03 |
| Benodanil | -6.93 | -7.47 | 0.54 |
| Benomyl | -9.7 | -8.7 | -1.00 |
| Benoxacor | -5.3 | -5.52 | 0.22 |
| Benz[a]anthracene | -4.39 | -4.39 | 0.00 |
| Benz[e]acephenanthrylene | -4.57 | -4.89 | 0.32 |
| Benzalchloride | -1.79 | -1.77 | -0.02 |
| Benzaldehyde | -3.04 | -3.23 | 0.19 |
| Benzamide | -8 | -6.9 | -1.10 |
| Benzene | -0.65 | -0.79 | 0.14 |
| Benzo[a]phenanthrene | -3.67 | -4.39 | 0.72 |
| Benzo[a]pyrene | -4.73 | -5.57 | 0.84 |
| Benzo[b]fluorene | -3.79 | -3.63 | -0.16 |
| Benzo[b]triphenylene | -4.67 | -5.59 | 0.92 |
| Benzo[e]pyrene | -4.91 | -5.57 | 0.66 |
| Benzo[f]quinoline | -5.15 | -5.41 | 0.26 |
| Benzo[g,h,i]perylene | -5.23 | -6.75 | 1.52 |
| Benzo[k]fluoranthene | -4.62 | -4.89 | 0.27 |
| Benzoic acid | -5.54 | -5.47 | -0.07 |
| Benzonitrile | -2.86 | -2.93 | 0.07 |
| Benzophosphate | -5.6 | -4.49 | -1.11 |
| Benzotrifluoride | -0.17 | -0.58 | 0.41 |
| Benzoylprop-ethyl | -7.46 | -7 | -0.46 |
| Benzpyrimoxan | -6.42 | -7.16 | 0.74 |
| Benzthiazuron | -9.68 | -9.65 | -0.03 |
| Benzyl acetate | -3.34 | -3.18 | -0.16 |
| Benzyl benzoate | -4.01 | -4.29 | 0.28 |
| Benzyl butyl phthalate | -5.39 | -6.36 | 0.97 |
| Benzyl formate | -3.08 | -3.01 | -0.07 |
| Benzyl methyl ether | -2.44 | -2.48 | 0.04 |
| beta-Citronellol | -3.14 | -3.45 | 0.31 |
| beta-HCH | -4.83 | -4.03 | -0.80 |
| beta-Ionone | -2.47 | -2.6 | 0.13 |
| beta-Phellandrene | 0.35 | -0.07 | 0.42 |
| Bifenazate | -7.7 | -7.01 | -0.69 |
| Bifenox | -7.34 | -6.23 | -1.11 |
| Binapacryl | -5.73 | -6.08 | 0.35 |
| Biphenyl | -1.92 | -1.67 | -0.25 |
| Bis(2-chloroethyl) ether | -2.29 | -2.68 | 0.39 |
| Bis(2-chloroethyl)ethylamine | -3.72 | -3.23 | -0.49 |
| Bitertanol | -10.47 | -9.66 | -0.81 |
| Borneol | -3.04 | -3.58 | 0.54 |
| Bromacil | -8.43 | -7.47 | -0.96 |
| Bromoacetic acid | -6.57 | -5.34 | -1.23 |
| Bromobenzene | -1.03 | -1.37 | 0.34 |
| Bromobutide | -5.68 | -5.8 | 0.12 |
| Bromocyclohexane | -1.24 | -1.36 | 0.12 |
| Bromoethane | -0.51 | -1.03 | 0.52 |
| Bromofenoxim | -10.28 | -11.35 | 1.07 |
| Bromophos | -2.39 | -3.25 | 0.86 |
| Bromophos-ethyl | -2.79 | -2.99 | 0.20 |
| Bromoxynil butyrate | -3.94 | -5.25 | 1.31 |
| Bromoxynil heptanoate | -3.78 | -5.25 | 1.47 |
| Bromoxynil octanoate | -3.94 | -5.25 | 1.31 |
| Buprofezin | -4.62 | -6.58 | 1.96 |
| Butacarb | -5.55 | -4.99 | -0.56 |
| Butachlor | -5.68 | -4.3 | -1.38 |
| Butanal | -2.33 | -2.1 | -0.23 |
| Butanamide | -6.9 | -5.77 | -1.13 |
| Butane | 1.53 | 0.53 | 1.00 |
| Butanedioic acid | -10.67 | -10 | -0.67 |
| Butanoic acid | -4.66 | -4.34 | -0.32 |
| Butenachlor | -5.4 | -5.28 | -0.12 |
| Butocarboxim | -7.41 | -6.87 | -0.54 |
| Butralin | -3.17 | -4.01 | 0.84 |
| Buturon | -7.5 | -7.26 | -0.24 |
| Butyl 4-hydroxybenzoate | -6.21 | -5.91 | -0.30 |
| Butyl butanoate | -1.55 | -2.04 | 0.49 |
| Butyl lactate | -4 | -5.15 | 1.15 |
| Butyl propanoate | -1.7 | -2.05 | 0.35 |
| Butyl vinyl ether | -0.22 | -0.36 | 0.14 |
| Butylacetamide | -6.83 | -5.42 | -1.41 |
| Butylate | -2.46 | -3.12 | 0.66 |
| Butylbenzene | -0.26 | -0.63 | 0.37 |
| Butylcellosolve | -4.18 | -4.57 | 0.39 |
| Butylmethylketone | -2.44 | -1.96 | -0.48 |
| Butylnitrate | -1.39 | -1.64 | 0.25 |
| Butyric acid methylester | -2.08 | -2.18 | 0.10 |
| Butyronitrile | -2.56 | -1.8 | -0.76 |
| Cafenstrole | -9.3 | -9.24 | -0.06 |
| Camphene | 0.23 | -0.25 | 0.48 |
| Cantharidic acid | -13.72 | -11.86 | -1.86 |
| Capraldehyde | -1.3 | -2.04 | 0.74 |
| Caproic aldehyde | -2.06 | -2.08 | 0.02 |
| Caprylene | 1.4 | 0.4 | 1.00 |
| Caprylic aldehyde | -1.72 | -2.06 | 0.34 |
| Carbaril | -7.43 | -7.16 | -0.27 |
| Carbazole | -5.32 | -4.62 | -0.70 |
| Carbendazim | -8.62 | -8.87 | 0.25 |
| Carbetamide | -10.74 | -10.09 | -0.65 |
| Carbofuran | -7.69 | -6.7 | -0.99 |
| Carbophenothion | -4.75 | -4.52 | -0.23 |
| Carbophos | -5.62 | -5.98 | 0.36 |
| Carvone | -3.08 | -2.72 | -0.36 |
| Cedrene | 0.15 | -0.22 | 0.37 |
| CGA307771 | -7.95 | -7.99 | 0.04 |
| Chloral | -2.51 | -2.48 | -0.03 |
| Chloral hydrate | -6.93 | -6.9 | -0.03 |
| Chlorbufam | -6.27 | -5.42 | -0.85 |
| Chlordane | -2.65 | -2.57 | -0.08 |
| Chlordimeform | -4.44 | -4.58 | 0.14 |
| Chlorfenidim | -7.32 | -7.09 | -0.23 |
| Chlorfenprop-methyl | -4.04 | -3.93 | -0.11 |
| Chlorimuron-ethyl | -11 | -12.26 | 1.26 |
| Chlorinate | -6.45 | -6.72 | 0.27 |
| Chlormethine | -3.52 | -3.36 | -0.16 |
| Chlormethoxynil | -3.1 | -4.63 | 1.53 |
| Chloroacetaldehyde | -3.21 | -2.84 | -0.37 |
| Chloroacetamide | -6.46 | -6.51 | 0.05 |
| Chloroacetic acid | -6.42 | -5.08 | -1.34 |
| Chloroacetic acid ethylester | -2.79 | -2.79 | 0.00 |
| Chloroacetone | -3.17 | -2.69 | -0.48 |
| Chloroacetonitrile | -3.13 | -2.54 | -0.59 |
| Chlorobenzene | -0.77 | -1.16 | 0.39 |
| Chlorobenzilate | -5.74 | -7.54 | 1.80 |
| Chlorocyclohexane | -0.62 | -1.39 | 0.77 |
| Chloroethane | -0.3 | -0.77 | 0.47 |
| Chloroethylene | -0.01 | -0.21 | 0.20 |
| Chloroneb | -2.38 | -2.44 | 0.06 |
| Chlorophacinone | -9.87 | -8.66 | -1.21 |
| Chlorophthalim | -6.1 | -6.75 | 0.65 |
| Chloroprene | -0.24 | 0.24 | -0.48 |
| Chloropropham | -4.76 | -4.75 | -0.01 |
| Chloropropylate | -6.21 | -7.26 | 1.05 |
| Chlorothalonil | -5.09 | -5.05 | -0.04 |
| Chloroxifenidim | -8 | -8.32 | 0.32 |
| Chlorpyrifos-methyl | -3.66 | -3.28 | -0.38 |
| Chlorpyriphos | -3.77 | -3.02 | -0.75 |
| Chlorsulfuron | -11.24 | -11.23 | -0.01 |
| Chlorthion | -5.22 | -4.49 | -0.73 |
| Chlorthiophos | -3.57 | -3.71 | 0.14 |
| Chlortoluron | -7.67 | -7.16 | -0.51 |
| Chlozolinate | -6.06 | -7.16 | 1.10 |
| Ciafos | -4.43 | -4.71 | 0.28 |
| Cimetacarb | -9.79 | -10.09 | 0.30 |
| Cinmethylin | -4.5 | -4.23 | -0.27 |
| cis- Cyclooctene | 0.29 | -0.56 | 0.85 |
| cis-1,2-Cyclohexyl dinitrate | -3.5 | -3.51 | 0.01 |
| cis-1,2-Dichloroethylene | -0.73 | -0.59 | -0.14 |
| cis-1,2-Dimethylcyclohexane | 1.17 | 0.62 | 0.55 |
| cis-1,3-Cyclohexyl dinitrate | -3.93 | -3.51 | -0.42 |
| cis-1,3-Dichloropropene | -0.87 | -0.13 | -0.74 |
| cis-1,4-Dichloro-2-butene | -1.32 | -1.7 | 0.38 |
| cis-2,4,6-Trimethyl-1,3,5-trioxane | -2.54 | -4.45 | 1.91 |
| cis-2,4-Pentyl dinitrate | -2.73 | -2.68 | -0.05 |
| cis-2-Butene | 0.98 | -0.02 | 1.00 |
| cis-2-Chloro-2-butene | -0.37 | 0.03 | -0.40 |
| cis-2-Hexene | 1.01 | 0.1 | 0.91 |
| cis-2-Octene | 1.54 | 0.22 | 1.32 |
| cis-2-Pentene | 0.96 | 0.04 | 0.92 |
| cis-3-Hexenyl acetate | -1.89 | -2.29 | 0.40 |
| cis-4-Heptenal | -2.34 | -2.29 | -0.05 |
| cis-Nonachlor | -3.54 | -3.13 | -0.41 |
| Clethodim | -7.87 | -6.93 | -0.94 |
| Clodinafop-propargyl | -6.95 | -5.61 | -1.34 |
| Cloethocarb | -8.94 | -8.26 | -0.68 |
| Clofenotane | -3.47 | -2.62 | -0.85 |
| Clofenvinfos | -6.06 | -5.16 | -0.90 |
| Cloquintocet-mexyl | -5.91 | -6.3 | 0.39 |
| Codlelure | -3.62 | -3.81 | 0.19 |
| Colamine | -7.02 | -6.62 | -0.40 |
| Coronene | -6.62 | -7.93 | 1.31 |
| Coumaphos | -5.45 | -5.01 | -0.44 |
| Coumarin | -5.34 | -3.79 | -1.55 |
| Crotonaldehyde | -2.8 | -2.32 | -0.48 |
| Crotonic acid | -4.76 | -4.56 | -0.20 |
| Crotoxyphos | -6.42 | -6.84 | 0.42 |
| Cumene | -0.35 | -0.56 | 0.21 |
| Cumyluron | -9.8 | -9.26 | -0.54 |
| Cyanazine | -7.98 | -7.6 | -0.38 |
| Cyanoethylene | -2.35 | -1.82 | -0.53 |
| Cycloate | -3.51 | -3.9 | 0.39 |
| Cyclogeraniolane | 1.64 | 1.1 | 0.54 |
| Cycloheptane | 0.65 | 0.11 | 0.54 |
| Cycloheptene | 0.28 | -0.6 | 0.88 |
| Cyclohexane | 0.88 | -0.01 | 0.89 |
| Cyclohexanol | -4.01 | -3.92 | -0.09 |
| Cyclohexanone | -3.32 | -2.74 | -0.58 |
| Cyclohexene | 0.07 | -0.68 | 0.75 |
| Cyclohexyl acetate | -2.42 | -2.6 | 0.18 |
| Cyclohexyl butanoate | -2.82 | -2.6 | -0.22 |
| Cyclohexylamine | -3.77 | -3.75 | -0.02 |
| Cyclooctane | 0.74 | 0.23 | 0.51 |
| Cyclopentadiene | -0.07 | -0.84 | 0.77 |
| Cyclopentane | 0.84 | -0.13 | 0.97 |
| Cyclopentanone | -3.32 | -2.72 | -0.60 |
| Cyclopentene | 0.25 | -0.68 | 0.93 |
| Cyclopropane | 0.53 | -0.37 | 0.90 |
| Cycloxydim | -7.26 | -8.12 | 0.86 |
| Cyenopyrafen | -6.6 | -6.29 | -0.31 |
| Cyfluthrin | -5.42 | -6.09 | 0.67 |
| Cyhalofop | -8.63 | -8.46 | -0.17 |
| Cyhalofop-butyl | -6.08 | -6.2 | 0.12 |
| Cymperator | -5.14 | -6.24 | 1.10 |
| Cyprazine | -7.27 | -6.72 | -0.55 |
| Cyproconazole | -7.66 | -8.32 | 0.66 |
| Cyprodinil | -5.46 | -6.18 | 0.72 |
| Cyprofuram | -8.89 | -7.15 | -1.74 |
| Cyromazine | -11.56 | -11.06 | -0.50 |
| DBCP | -3.09 | -2.25 | -0.84 |
| DCPA | -4.25 | -5.82 | 1.57 |
| DDD | -3.57 | -2.85 | -0.72 |
| DDE | -2.77 | -2.76 | -0.01 |
| Decabromodiphenyl ether | -5.09 | -5.12 | 0.03 |
| Decamethylcyclopentasiloxane | 3.16 | 2.97 | 0.19 |
| Decane | 2.32 | 1.43 | 0.89 |
| Decylbenzene | 0.56 | -0.27 | 0.83 |
| DEHP | -3.57 | -4.91 | 1.34 |
| delta-HCH | -4.76 | -4.03 | -0.73 |
| Demeton-O | -4.01 | -3.35 | -0.66 |
| Desmedipham | -9.76 | -9.66 | -0.10 |
| Devrinol | -7.47 | -6.97 | -0.50 |
| Diacetylene | -0.66 | -1.06 | 0.40 |
| Diallyl sulfide | -1.01 | -1.31 | 0.30 |
| Diallylamine | -3 | -2.39 | -0.61 |
| Diamylamine | -2.19 | -2.32 | 0.13 |
| Dibenz[a,h]anthracene | -5.24 | -5.59 | 0.35 |
| Dibenzo[b,d]thiophene | -2.86 | -3.45 | 0.59 |
| Dibenzo[b,e]pyridine | -5.07 | -4.91 | -0.16 |
| Dibenzofuran | -2.44 | -3.14 | 0.70 |
| Dibenzo-p-dioxin | -2.34 | -3.19 | 0.85 |
| Dibenzyl ether | -3.57 | -3.46 | -0.11 |
| Dibutyl ether | -0.72 | -1.2 | 0.48 |
| Dibutyl maleate | -4.36 | -4.32 | -0.04 |
| Dibutyl phthalate | -4.36 | -5.23 | 0.87 |
| Dibutylamine | -2.38 | -2.35 | -0.03 |
| Dicapthon | -5.01 | -4.49 | -0.52 |
| Dichlofenthion | -2.77 | -2.76 | -0.01 |
| Dichlorfenidim | -7.52 | -7.16 | -0.36 |
| Dichloroacetic acid | -6.47 | -4.95 | -1.52 |
| Diclofop-methyl | -4.9 | -4.78 | -0.12 |
| Dicofol | -5.22 | -5.88 | 0.66 |
| Dicyclohexyl phthalate | -5.41 | -6.34 | 0.93 |
| Diethion | -4.91 | -4.67 | -0.24 |
| Diethofencarb | -7.42 | -5.67 | -1.75 |
| Diethyl adipate | -4.65 | -4.05 | -0.60 |
| Diethyl cellosolve | -2.59 | -2.48 | -0.11 |
| Diethyl glutarate | -4.62 | -4.12 | -0.50 |
| Diethyl malonate | -3.99 | -4.08 | 0.09 |
| Diethyl oxalate | -4.05 | -4.09 | 0.04 |
| Diethyl phthalate | -5.13 | -5.27 | 0.14 |
| Diethyl pimelate | -4.73 | -4.06 | -0.67 |
| Diethyl succinate | -4.67 | -4.07 | -0.60 |
| Diethyl sulphide | -1.07 | -1.34 | 0.27 |
| Diethylacetaldehyde | -1.67 | -1.95 | 0.28 |
| Diethylamine | -2.98 | -2.39 | -0.59 |
| Diethylcarbonate | -2.43 | -2.93 | 0.50 |
| Diethylene glycol monohexyl ether | -5.09 | -5.83 | 0.74 |
| Diethyleneglycol dinitrate | -4.8 | -4.47 | -0.33 |
| Diethyleneglycol monobutyl ether | -6.53 | -5.83 | -0.70 |
| Diethyleneglycol-di-n-butylether | -3.99 | -3.69 | -0.30 |
| Diethylketone | -2.34 | -1.97 | -0.37 |
| Difenoconazole | -8.95 | -7.21 | -1.74 |
| Difenoxuron | -10.78 | -8.85 | -1.93 |
| Diflubenzuron | -7.29 | -8.42 | 1.13 |
| Dihexyl phthalate | -3.87 | -5.19 | 1.32 |
| Diisoamyl ether | -1.23 | -0.92 | -0.31 |
| Diisobutyl ether | -0.62 | -0.99 | 0.37 |
| Diisobutylamine | -2 | -2.09 | 0.09 |
| Diisobutylene | 2 | 0.91 | 1.09 |
| Diisopropyl ether | -1.05 | -0.66 | -0.39 |
| Diisopropyl sulfide | -0.87 | -0.41 | -0.46 |
| Diisopropylamine | -2.36 | -1.73 | -0.63 |
| Dimepiperate | -5.84 | -5.21 | -0.63 |
| Dimethachlor | -7 | -6.24 | -0.76 |
| Dimethenamid | -5.48 | -5.55 | 0.07 |
| Dimethirimol | -7.15 | -8.43 | 1.28 |
| Dimethoxymethane | -2.35 | -2.22 | -0.13 |
| Dimethyl carbonate | -2.7 | -3.2 | 0.50 |
| Dimethyl hexanedioate | -5.03 | -4.34 | -0.69 |
| Dimethyl maleate | -4.54 | -4.54 | 0.00 |
| Dimethyl malonate | -4.99 | -4.34 | -0.65 |
| Dimethyl oxalate | -3.92 | -4.34 | 0.42 |
| Dimethyl phthalate | -5.3 | -5.53 | 0.23 |
| Dimethyl sebacate | -4.64 | -4.29 | -0.35 |
| Dimethyl succinate | -4.87 | -4.33 | -0.54 |
| Dimethyl sulfide | -1.6 | -1.54 | -0.06 |
| Dimethyl-(2,2-dichlorovinyl) phosphate | -4.98 | -4.09 | -0.89 |
| Dimethylacetamide | -6.04 | -4.62 | -1.42 |
| Dimethylamine | -3.14 | -2.65 | -0.49 |
| Dimethylether | -1.39 | -1.5 | 0.11 |
| Dimethylterephthalate | -4.75 | -5.54 | 0.79 |
| Dimethylvinphos | -5.87 | -5.4 | -0.47 |
| Dimoxystrobin | -9.32 | -9.44 | 0.12 |
| Dimpylate | -4.22 | -4.99 | 0.77 |
| Dinitramine | -4.25 | -4.15 | -0.10 |
| Di-n-octyladipate | -4.29 | -4.12 | -0.17 |
| Dinoseb | -4.58 | -4.83 | 0.25 |
| Dinoseb acetate | -6.58 | -5.85 | -0.73 |
| Dinoterb | -4.77 | -4.57 | -0.20 |
| Di-n-propyl phthalate | -4.74 | -5.25 | 0.51 |
| Diofenolan | -5.57 | -5.69 | 0.12 |
| Dioxabenzofos | -2.94 | -3.51 | 0.57 |
| Dioxacarb | -9.22 | -9.01 | -0.21 |
| Diphenyl 2-ethylhexyl phosphate | -3.59 | -5.09 | 1.50 |
| Diphenyl ether | -2.01 | -2.32 | 0.31 |
| Diphenylamine | -3.96 | -3.8 | -0.16 |
| Diphenylcarbonate | -3.72 | -4.5 | 0.78 |
| Diphenylmethane | -1.92 | -1.61 | -0.31 |
| Diphenylmethanol | -5.97 | -5.33 | -0.64 |
| Dipropyl ether | -0.86 | -1.22 | 0.36 |
| Dipropyl sulfide | -0.9 | -1.32 | 0.42 |
| Dipropylamine | -2.7 | -2.37 | -0.33 |
| Dipropyleneglycol dibenzoate | -6.25 | -6.99 | 0.74 |
| Disugran | -6.85 | -6.2 | -0.65 |
| Disulfoton | -3.91 | -3.44 | -0.47 |
| Divinyl ether | -0.48 | 0.11 | -0.59 |
| Dodecamethylcyclohexasiloxane | 3 | 3.71 | -0.71 |
| Dodecane | 2.53 | 1.73 | 0.80 |
| Dodecanedioic acid | -9.39 | -9.92 | 0.53 |
| Drazoxolon | -5.54 | -6.03 | 0.49 |
| Dyrene | -4.6 | -3.5 | -1.10 |
| E-beta-Caryophyllene | 0.04 | -0.06 | 0.10 |
| Empenthrin | -1.85 | -2.77 | 0.92 |
| Enanthic acid | -4.52 | -4.31 | -0.21 |
| Endrin | -4.7 | -3.35 | -1.35 |
| endrin aldehyde | -3.77 | -4.62 | 0.85 |
| Enilconazole | -6.71 | -5.88 | -0.83 |
| Epichlorohydrin | -2.86 | -2.44 | -0.42 |
| epsilon-Caprolactam | -7.65 | -6.21 | -1.44 |
| Eradicane | -3.14 | -3.4 | 0.26 |
| Erythritol | -12.79 | -12.31 | -0.48 |
| Esbiothrin | -5.17 | -4.73 | -0.44 |
| Esprocarb | -3.66 | -4.08 | 0.42 |
| Ethametsulfuron-methyl | -12.72 | -14.19 | 1.47 |
| Ethane | 1.33 | 0.23 | 1.10 |
| Ethanediol diacetate | -4.78 | -4.12 | -0.66 |
| Ethanol | -3.62 | -3.4 | -0.22 |
| Ethene | 0.83 | 0.25 | 0.58 |
| Ethiofencarb | -7.33 | -7.12 | -0.21 |
| Ethoxybenzene | -1.62 | -1.55 | -0.07 |
| Ethoxyquin | -4.3 | -4.38 | 0.08 |
| Ethyl 2,4-dichlorophenoxyacetate | -3.88 | -3.71 | -0.17 |
| Ethyl 4-(4-chloro-2-methylphenoxy)butanoate | -4.94 | -3.76 | -1.18 |
| Ethyl 4-hydroxybenzoate | -6.64 | -5.93 | -0.71 |
| Ethyl acetate | -2.21 | -2.07 | -0.14 |
| Ethyl acetoacetate | -4.32 | -4 | -0.32 |
| Ethyl acrylate | -1.99 | -2.07 | 0.08 |
| Ethyl benzoate | -2.67 | -3.18 | 0.51 |
| Ethyl butanoate | -1.86 | -2.05 | 0.19 |
| Ethyl caprylate | -1.44 | -2.09 | 0.65 |
| Ethyl cyanoacetate | -4.93 | -3.84 | -1.09 |
| Ethyl decanoate | -1.54 | -2.09 | 0.55 |
| Ethyl ether | -1.39 | -1.24 | -0.15 |
| Ethyl formate | -1.93 | -1.87 | -0.06 |
| Ethyl heptanoate | -1.69 | -2.09 | 0.40 |
| Ethyl hexanoate | -1.67 | -2.03 | 0.36 |
| Ethyl iodide | -0.54 | -0.44 | -0.10 |
| Ethyl isovalerate | -1.69 | -1.92 | 0.23 |
| Ethyl methacrylate | -1.78 | -2.05 | 0.27 |
| Ethyl methyl sulfide | -1.1 | -1.43 | 0.33 |
| Ethyl pentanoate | -1.85 | -2.05 | 0.20 |
| Ethyl propanoate | -2.05 | -2.06 | 0.01 |
| Ethyl t-amyl ether | -1.08 | -1 | -0.08 |
| Ethyl t-butyl ether | -1.17 | -1 | -0.17 |
| Ethyl trans-cinnamate | -3.76 | -3.38 | -0.38 |
| Ethyl trifluoroacetate | -0.39 | -1.52 | 1.13 |
| Ethyl vanillin | -6.12 | -6.44 | 0.32 |
| Ethyl vinyl ether | -0.65 | -0.27 | -0.38 |
| Ethylamine | -3.3 | -3.27 | -0.03 |
| Ethylbenzene | -0.54 | -0.75 | 0.21 |
| Ethylcyclohexane | 1.3 | 0.48 | 0.82 |
| Ethylene glycol monobutyl ether acetate | -3.65 | -3.3 | -0.35 |
| Ethylenedichloride | -1.4 | -1.49 | 0.09 |
| Ethyleneglycol monobenzyl ether | -5.31 | -6.95 | 1.64 |
| Ethylisopropylketone | -2.2 | -1.83 | -0.37 |
| Ethylnitrate | -1.6 | -1.66 | 0.06 |
| Ethylpyrazine | -4 | -4.83 | 0.83 |
| Ethyne | -0.01 | -0.22 | 0.21 |
| Ethynylbenzene | -1.6 | -1.39 | -0.21 |
| Etofenprox | -5.26 | -4.77 | -0.49 |
| Etohexadiol | -5.6 | -6.14 | 0.54 |
| Etrimfos | -4.48 | -4.59 | 0.11 |
| exo-Dicyclopentadiene | -0.36 | -1.46 | 1.10 |
| Fenamidone | -8.33 | -8.04 | -0.29 |
| Fenazaquin | -4.68 | -4.92 | 0.24 |
| Fenbuconazole | -7.91 | -6.9 | -1.01 |
| Fenchlorazole-ethyl | -6.44 | -7.93 | 1.49 |
| Fenchlorphos | -3.08 | -3.04 | -0.04 |
| Fenchol | -2.94 | -3.58 | 0.64 |
| Fenfuram | -7.79 | -6.43 | -1.36 |
| Fenhexamid | -8.5 | -8.76 | 0.26 |
| Fenobucarb | -5.57 | -5.71 | 0.14 |
| Fenothiocarb | -6.12 | -5.18 | -0.94 |
| Fenoxycarb | -7.79 | -7.59 | -0.20 |
| Fenpiclonil | -6.66 | -6.85 | 0.19 |
| Fenpropimorph | -3.7 | -3.77 | 0.07 |
| Fenthion | -4.15 | -3.84 | -0.31 |
| Fenthoate | -4.95 | -5.08 | 0.13 |
| Fentrazamide | -8.1 | -8.9 | 0.80 |
| Fenvalerate | -6.62 | -6.77 | 0.15 |
| Flamprop-M-isopropyl | -6.16 | -6.43 | 0.27 |
| Flamprop-M-methyl | -6.74 | -6.84 | 0.10 |
| Flonicamid | -10.4 | -9.82 | -0.58 |
| Florpyrauxifen | -10.89 | -11.24 | 0.35 |
| Fluacrypyrim | -5.7 | -4.59 | -1.11 |
| Fluazifop-butyl | -5.35 | -4.62 | -0.73 |
| Flufenoxuron | -8.52 | -8.98 | 0.46 |
| Flufenprox | -4.72 | -4.58 | -0.14 |
| Fluometuron | -6.97 | -6.51 | -0.46 |
| Fluopicolide | -7.45 | -9.01 | 1.56 |
| Fluoranthene | -3.35 | -3.69 | 0.34 |
| Fluorene | -2.57 | -2.43 | -0.14 |
| Fluoroacetone | -2.96 | -1.83 | -1.13 |
| Fluorobenzene | -0.57 | -0.89 | 0.32 |
| Fluoroethane | -0.04 | 0.08 | -0.12 |
| Fluquinconazole | -8.6 | -9.1 | 0.50 |
| Fluridone | -6.84 | -6.08 | -0.76 |
| Flurochloridone | -5.8 | -5.38 | -0.42 |
| Fluroxene | -0.1 | 0.21 | -0.31 |
| Flurprimidol | -7.27 | -7.87 | 0.60 |
| Flusulfamide | -7 | -6.01 | -0.99 |
| Flutolanil | -7.78 | -6.34 | -1.44 |
| Flutriafol | -8.59 | -8.51 | -0.08 |
| Fluxofenim | -3.53 | -4.73 | 1.20 |
| Folbex | -6.31 | -7.67 | 1.36 |
| Forchlorfenuron | -9.96 | -9.68 | -0.28 |
| Formaldehyde diethylacetal | -2.56 | -1.96 | -0.60 |
| Formic acid | -4.91 | -4.16 | -0.75 |
| Formothion | -6.62 | -8.23 | 1.61 |
| Furalaxyl | -7.28 | -6.92 | -0.36 |
| Furan | -0.65 | -0.84 | 0.19 |
| Furconazole | -6.96 | -7.15 | 0.19 |
| Furfural | -3.61 | -2.99 | -0.62 |
| Galaxolide | -2.48 | -2.72 | 0.24 |
| gamma-Terpinene | 0.02 | -0.36 | 0.38 |
| Geranyl nitrile | -2 | -2.16 | 0.16 |
| Glutaraldehyde | -5.87 | -4.18 | -1.69 |
| Glycerol trinitrate | -5.76 | -4.59 | -1.17 |
| Glyceryltriacetate | -6.3 | -5.82 | -0.48 |
| Glycolaldehyde | -5 | -5.47 | 0.47 |
| Glyme | -3.51 | -2.69 | -0.82 |
| Glyoxylic acid | -5.44 | -6.41 | 0.97 |
| Gossyplure (Z,Z)- | -1.9 | -2.49 | 0.59 |
| Guajen | -2.04 | -2.03 | -0.01 |
| Halacrinate | -5.55 | -6.1 | 0.55 |
| Halauxifen-methyl | -8.94 | -9.3 | 0.36 |
| Harmony | -12.75 | -13.28 | 0.53 |
| Hemimellitene | -0.89 | -0.85 | -0.04 |
| Heptachlor | -1.91 | -2.17 | 0.26 |
| Heptachlor epoxide | -3.45 | -3.41 | -0.04 |
| Heptane | 1.96 | 0.98 | 0.98 |
| Heptanedioic acid | -10.5 | -9.97 | -0.53 |
| Heptenophos | -5.34 | -5.28 | -0.06 |
| Heptyl bromide | 0.25 | -0.98 | 1.23 |
| Heptylbenzene | 0.09 | -0.45 | 0.54 |
| Heptylcyclohexane | 1.82 | 1.23 | 0.59 |
| Heroine | -10.6 | -8.98 | -1.62 |
| Hexabromobenzene | -3.01 | -2.77 | -0.24 |
| Hexachlorobenzene | -1.21 | -1.51 | 0.30 |
| Hexachlorobutadiene | -0.14 | -0.21 | 0.07 |
| Hexachloroethane | -0.83 | -0.77 | -0.06 |
| Hexachloropropylene | -0.67 | -0.5 | -0.17 |
| Hexaconazole | -7.05 | -7.93 | 0.88 |
| Hexafluoro-2-propanol | -2.39 | -1.95 | -0.44 |
| Hexafluorobenzene | 0.13 | 0.11 | 0.02 |
| Hexafluoroethane | 2.82 | 1.08 | 1.74 |
| Hexamethylbenzene | -1.33 | -0.91 | -0.42 |
| Hexamethylcyclotrisiloxane | 1.8 | 1.42 | 0.38 |
| Hexanamide | -6.66 | -5.78 | -0.88 |
| Hexane | 1.85 | 0.83 | 1.02 |
| Hexanenitrile | -2.42 | -1.78 | -0.64 |
| Hexazinone | -10.08 | -9.8 | -0.28 |
| Hexyl bromide | 0.13 | -0.99 | 1.12 |
| Hexylbenzene | -0.03 | -0.51 | 0.48 |
| Hydrocinnamyl alcohol | -5.08 | -4.49 | -0.59 |
| Hydroprene | -2.1 | -2.21 | 0.11 |
| Hydroxyacetic acid | -7.68 | -7.71 | 0.03 |
| Imazamethabenz-methyl m-isomer | -9.59 | -10.52 | 0.93 |
| Imazamox | -14.21 | -15.62 | 1.41 |
| Imazaquin | -14.55 | -15.11 | 0.56 |
| Imibenconazole | -8.08 | -7.88 | -0.20 |
| Imiprothrin | -8.61 | -9.46 | 0.85 |
| Indane | -1.07 | -1.49 | 0.42 |
| Indanofan | -7.67 | -8.17 | 0.50 |
| Indeno[1,2,3-cd]pyrene | -4.85 | -5.9 | 1.05 |
| Indole | -4.97 | -4.23 | -0.74 |
| Iodobenzene | -1.28 | -1.91 | 0.63 |
| Ioxynil | -8.11 | -7.32 | -0.79 |
| Ipconazole | -6.99 | -8.22 | 1.23 |
| Iprovalicarb | -8.78 | -10.39 | 1.61 |
| Isoamyl acetate | -1.72 | -1.91 | 0.19 |
| Isobutene | 0.85 | 0.17 | 0.68 |
| Isobutyl acetate | -1.73 | -1.94 | 0.21 |
| Isobutyl acrylate | -1.51 | -1.93 | 0.42 |
| Isobutyl bromide | -0.02 | -0.9 | 0.88 |
| Isobutyl chloride | -0.09 | -0.64 | 0.55 |
| Isobutyl formate | -1.63 | -1.73 | 0.10 |
| Isobutyl isobutyrate | -1.47 | -1.78 | 0.31 |
| Isobutyl methacrylate | -1.67 | -1.91 | 0.24 |
| Isobutyl methyl ketone | -2.23 | -1.83 | -0.40 |
| Isobutyl nitrate | -1.36 | -1.52 | 0.16 |
| Isobutyl propanoate | -1.57 | -1.92 | 0.35 |
| Isobutyl vinyl ether | -0.82 | -0.22 | -0.60 |
| Isobutylbenzene | 0.12 | -0.5 | 0.62 |
| Isobutylpyrazine | -3.7 | -4.67 | 0.97 |
| Isobutyronitrile | -2.4 | -1.67 | -0.73 |
| Isocumene | -0.37 | -0.69 | 0.32 |
| Isofetamide | -7.94 | -8.95 | 1.01 |
| Isomethiozin | -5.94 | -7.83 | 1.89 |
| Isooctane | 2.12 | 1.75 | 0.37 |
| Isopentane | 1.7 | 0.83 | 0.87 |
| Isopentene | 1.25 | 0.27 | 0.98 |
| Isopentyl bromide | 0.15 | -0.9 | 1.05 |
| Isopentyl formate | -1.56 | -1.75 | 0.19 |
| Isoprene | 0.49 | 0.22 | 0.27 |
| Isoprocarb | -5.89 | -5.71 | -0.18 |
| Isopropazol | -4.12 | -4.72 | 0.60 |
| Isopropyl formate | -1.48 | -1.6 | 0.12 |
| Isopropyl propionate | -1.63 | -1.79 | 0.16 |
| Isopropylacetate | -1.91 | -1.78 | -0.13 |
| Isopropylnitrate | -1.18 | -1.37 | 0.19 |
| Isoproturon | -7.94 | -6.94 | -1.00 |
| Isoquinoline | -4.21 | -4.51 | 0.30 |
| Isosativene | 0.01 | -0.33 | 0.34 |
| Isouron | -7.8 | -7.98 | 0.18 |
| Isovaleraldehyde | -1.94 | -1.98 | 0.04 |
| Isoxazole | -2.99 | -3.35 | 0.36 |
| Jodfenphos | -3.43 | -3.82 | 0.39 |
| Kappa-bifenthrin | -4.39 | -3.75 | -0.64 |
| Kappa-Tefluthrin | -1 | -1.81 | 0.81 |
| Karbutilate | -11.64 | -10.79 | -0.85 |
| Kepone | -5.4 | -3.99 | -1.41 |
| Kresoxim-methyl | -6.61 | -6.02 | -0.59 |
| KTU3616 | -6.32 | -6.77 | 0.45 |
| Lactofen | -5.8 | -7.32 | 1.52 |
| lambda-Cyhalothrin | -4.75 | -5.2 | 0.45 |
| Lenacil | -10.25 | -9 | -1.25 |
| Limonene oxide | -2.58 | -2.06 | -0.52 |
| Linalool | -3.06 | -3.31 | 0.25 |
| Lindane | -3.57 | -4.03 | 0.46 |
| L-Menthone | -2.15 | -2.31 | 0.16 |
| Longipinene | 0.08 | -0.33 | 0.41 |
| Maleic hydrazide | -10.48 | -8.62 | -1.86 |
| Malic acid | -11.83 | -11.05 | -0.78 |
| Mandestrobin | -9.14 | -9.46 | 0.32 |
| m-Anisidine | -5.35 | -4.65 | -0.70 |
| m-Anthranilic acid | -9.97 | -8.44 | -1.53 |
| MCPB | -7.95 | -5.98 | -1.97 |
| m-Cresol | -4.46 | -3.91 | -0.55 |
| Mecoprop | -6.8 | -5.71 | -1.09 |
| Menthol | -2.89 | -3.49 | 0.60 |
| Mepanipyrim | -6.13 | -6.54 | 0.41 |
| Meptyldinocap | -5.49 | -6.1 | 0.61 |
| Mercaptodimethur | -7 | -6.84 | -0.16 |
| Metalaxyl | -7.91 | -7.31 | -0.60 |
| Metamitron | -10.46 | -9.19 | -1.27 |
| Metaxon | -7.78 | -6 | -1.78 |
| Metconazole | -6.79 | -8.04 | 1.25 |
| Methacrifos | -4.21 | -3.97 | -0.24 |
| Methacrolein | -2.2 | -2.09 | -0.11 |
| Methanol | -3.75 | -3.53 | -0.22 |
| Methibenzuron | -7.64 | -8.19 | 0.55 |
| Methoprotryne | -8.06 | -7.97 | -0.09 |
| Methoxychlor | -5.08 | -3.66 | -1.42 |
| Methyl (Z) 9-octadecenoate | -1.56 | -2.26 | 0.70 |
| Methyl 2,4-dichlorophenoxyacetate | -3.93 | -3.87 | -0.06 |
| Methyl 2-hydroxybenzoate | -3.39 | -4.04 | 0.65 |
| Methyl 4-hydroxybenzoate | -6.98 | -6.06 | -0.92 |
| Methyl acetate | -2.33 | -2.2 | -0.13 |
| Methyl acrylate | -2.09 | -2.2 | 0.11 |
| Methyl benzoate | -2.88 | -3.31 | 0.43 |
| Methyl cellosolve | -4.87 | -4.72 | -0.15 |
| Methyl cyclohexanecarboxylate | -2.42 | -2.87 | 0.45 |
| Methyl cyclopropanecarboxylate | -3.01 | -2.81 | -0.20 |
| Methyl decanoate | -1.44 | -2.12 | 0.68 |
| Methyl formate | -2.01 | -2 | -0.01 |
| Methyl hexanoate | -1.82 | -2.16 | 0.34 |
| Methyl isoamyl ketone | -2.15 | -1.82 | -0.33 |
| Methyl laurate | -1.31 | -2.1 | 0.79 |
| Methyl methacrylate | -1.88 | -2.18 | 0.30 |
| Methyl methoxyacetate | -3.9 | -3.54 | -0.36 |
| Methyl octanoate | -1.5 | -2.15 | 0.65 |
| Methyl pivalate | -1.76 | -1.74 | -0.02 |
| Methyl propanoate | -2.18 | -2.19 | 0.01 |
| Methyl t-pentyl ether | -1.05 | -1.12 | 0.07 |
| Methyl trifluoroacetate | -1.05 | -1.62 | 0.57 |
| Methyl valerate | -1.89 | -2.17 | 0.28 |
| Methyl vinyl ether | -0.71 | -0.48 | -0.23 |
| Methylacetamide | -6.9 | -5.55 | -1.35 |
| Methylacetoacetate | -4.35 | -4.12 | -0.23 |
| Methylamine | -3.37 | -3.4 | 0.03 |
| Methylbenzene | -0.6 | -0.81 | 0.21 |
| Methylchloroacetate | -3.02 | -2.93 | -0.09 |
| Methylchloroform | -0.19 | -0.41 | 0.22 |
| Methylcyanoacetate | -4.94 | -3.97 | -0.97 |
| Methylcyclohexane | 1.19 | 0.27 | 0.92 |
| Methylcyclopentane | 1.13 | 0.15 | 0.98 |
| Methylnitrate | -1.69 | -1.78 | 0.09 |
| Methylnitrophos | -4.42 | -4.45 | 0.03 |
| Methyl-n-propylketone | -2.47 | -1.97 | -0.50 |
| Methyloxiran | -2.38 | -1.72 | -0.66 |
| Methylparathion | -4.6 | -4.38 | -0.22 |
| Methyltriazothion | -8.35 | -6.51 | -1.84 |
| Metofluthrin | -3.46 | -4.01 | 0.55 |
| Metolachlor | -5.1 | -5.87 | 0.77 |
| Metolcarb | -5.19 | -5.83 | 0.64 |
| Metominostrobin | -7.79 | -6.92 | -0.87 |
| Metoxuron | -9.03 | -7.68 | -1.35 |
| Metribuzin | -7.72 | -7.17 | -0.55 |
| Metsulfovax | -9.36 | -7.79 | -1.57 |
| Milbemectin A3 | -10.28 | -10.83 | 0.55 |
| Milbemycin A4 | -12.06 | -12.84 | 0.78 |
| Molinate | -4.31 | -4.27 | -0.04 |
| Monalide | -6.01 | -5.14 | -0.87 |
| Monocrotophos | -10.04 | -9.5 | -0.54 |
| Morpholine | -5.26 | -4.44 | -0.82 |
| MTBE | -1.26 | -1.05 | -0.21 |
| m-Toluidine | -4.14 | -4.13 | -0.01 |
| Musk ketone | -4.38 | -5.99 | 1.61 |
| Mustard gas | -3 | -2.77 | -0.23 |
| Myclobutanil | -6.77 | -6.09 | -0.68 |
| Myrcene | 0.42 | 0.4 | 0.02 |
| Myristyl alcohol | -2.18 | -3.28 | 1.10 |
| N,N-Diethylaniline | -2.26 | -2.63 | 0.37 |
| N,N-Diisopropylethanolamine | -5.07 | -4.5 | -0.57 |
| N,N-Dimethylaniline | -2.53 | -2.89 | 0.36 |
| N,N-Dimethylbenzylamine | -3.11 | -3.16 | 0.05 |
| N,N-Dimethylcyclohexylamine | -2.74 | -2.51 | -0.23 |
| N,N-Dimethylformamide | -5.73 | -4.53 | -1.20 |
| N,N-Dimethyloctylamine | -1.7 | -2.03 | 0.33 |
| N,N-Dimethyl-p-toluidine | -2.7 | -2.96 | 0.26 |
| Naphthalene | -1.77 | -1.99 | 0.22 |
| Naproanilide | -9.2 | -8.17 | -1.03 |
| n-Butyl acetate | -1.97 | -2.05 | 0.08 |
| n-Butyl acrylate | -1.72 | -2.05 | 0.33 |
| n-Butylbenzoate | -2.4 | -3.2 | 0.80 |
| n-Butylmethacrylate | -1.53 | -2.05 | 0.52 |
| n-Decanoic acid | -4.26 | -4.28 | 0.02 |
| n-Decyl alcohol | -2.67 | -3.32 | 0.65 |
| n-Decylamine | -2.68 | -3.19 | 0.51 |
| Neohexane | 1.85 | 1.29 | 0.56 |
| Neopentyl alcohol | -2.85 | -2.91 | 0.06 |
| Neral | -2.72 | -2.48 | -0.24 |
| N-Ethylaniline | -3.4 | -3.69 | 0.29 |
| n-Heptaldehyde | -1.96 | -2.07 | 0.11 |
| n-Heptylamine | -2.78 | -3.22 | 0.44 |
| n-Hexanoic acid | -4.53 | -4.32 | -0.21 |
| n-Hexylacetate | -1.7 | -2.03 | 0.33 |
| n-Hexylamine | -2.9 | -3.23 | 0.33 |
| Niclofen | -3.91 | -4.01 | 0.10 |
| Nitrobenzene | -3.01 | -2.64 | -0.37 |
| Nitroethane | -2.71 | -2.26 | -0.45 |
| Nitrothal-isopropyl | -6.15 | -6.3 | 0.15 |
| N-Methyl-2-pyrrolidone | -6.88 | -5.24 | -1.64 |
| N-Methyl-3,5-dimethylphenyl carbamate | -5.13 | -5.9 | 0.77 |
| N-Methylaniline | -3.44 | -3.82 | 0.38 |
| N-Methylformamide | -6.57 | -5.46 | -1.11 |
| N-Methylindole | -4.34 | -2.88 | -1.46 |
| N-Methylmorpholine | -4.37 | -3.95 | -0.42 |
| N-Methyl-N,2,4,6-tetranitroaniline | -8.4 | -10.02 | 1.62 |
| N-Methyl-N-nitrosobenzylamine | -3.72 | -4.98 | 1.26 |
| N-Methylpiperidine | -2.85 | -2.73 | -0.12 |
| N-Methylpyrrole | -2.15 | -2.48 | 0.33 |
| N-Methylpyrrolidine | -2.91 | -2.7 | -0.21 |
| N-Nitrosodibutylamine | -3.96 | -3.68 | -0.28 |
| N-Nitrosodiethylamine | -4.21 | -3.72 | -0.49 |
| N-Nitrosodiisopropylamine | -3.47 | -3.06 | -0.41 |
| N-Nitrosodimethylamine | -4.69 | -3.98 | -0.71 |
| N-Nitrosodipropylamine | -4.22 | -3.7 | -0.52 |
| N-Nitrosomorpholine | -6.35 | -5.77 | -0.58 |
| N-Nitrosopiperidine | -5.06 | -4.55 | -0.51 |
| N-Nitrosopyrrolidine | -6.15 | -4.53 | -1.62 |
| n-Nonanal | -1.52 | -2.05 | 0.53 |
| n-Octanoic acid | -4.44 | -4.3 | -0.14 |
| n-Octylamine | -2.68 | -3.21 | 0.53 |
| Nonane | 2.24 | 1.28 | 0.96 |
| Nonylbenzene | 0.56 | -0.33 | 0.89 |
| Nopinene | 0.28 | -0.25 | 0.53 |
| Norflurazon | -8.69 | -9.45 | 0.76 |
| n-Propyl acetate | -2.05 | -2.06 | 0.01 |
| n-Propyl iodide | -0.39 | -0.42 | 0.03 |
| n-Propylformate | -1.81 | -1.86 | 0.05 |
| n-Propylnitrate | -1.28 | -1.66 | 0.38 |
| Nuarimol | -8.01 | -9.49 | 1.48 |
| n-Valeraldehyde | -2.22 | -2.09 | -0.13 |
| O,O-Dimethyl-S-[2-(ethylthio)ethyl]dithiophosphate | -4.48 | -3.77 | -0.71 |
| o-Anthranilic acid | -7.17 | -6.42 | -0.75 |
| o-Cresol | -4.3 | -3.91 | -0.39 |
| Octabromodibenzo-p-dioxin | -5.1 | -5.43 | 0.33 |
| Octachlorodibenzofuran | -4.11 | -3.74 | -0.37 |
| Octachlorodibenzo-p-dioxin | -4.11 | -3.75 | -0.36 |
| Octachloronaphthalene | -3.48 | -3.05 | -0.43 |
| Octachlorostyrene | -2.11 | -1.59 | -0.52 |
| Octamethylcyclotetrasiloxane | 2.69 | 2.23 | 0.46 |
| Octane | 2.07 | 1.13 | 0.94 |
| Octanedioic acid | -10.35 | -9.96 | -0.39 |
| Octylbenzene | 0.3 | -0.39 | 0.69 |
| Octylcyanide | -2 | -1.75 | -0.25 |
| Octylcyclohexane | 2.02 | 1.38 | 0.64 |
| Ofurace | -7.45 | -7.35 | -0.10 |
| Orbencarb | -4.7 | -4.61 | -0.09 |
| Orysastrobin | -8.86 | -10.7 | 1.84 |
| o-Toluidine | -3.87 | -4.13 | 0.26 |
| Oxabetrinil | -5.33 | -7.01 | 1.68 |
| Oxadixyl | -9.7 | -8.62 | -1.08 |
| Oxalic acid | -8.23 | -9.99 | 1.76 |
| Oxidimethiin | -9.03 | -9.06 | 0.03 |
| Oxirane | -2.31 | -2.01 | -0.30 |
| Oxyfluorfen | -4.47 | -3.95 | -0.52 |
| Paclobutrazol | -7.88 | -7.06 | -0.82 |
| p-Anthranilic acid | -8.98 | -8.44 | -0.54 |
| Paraoxon | -7.05 | -6.33 | -0.72 |
| p-Benzidine | -9.29 | -8.21 | -1.08 |
| PCNB | -3.82 | -2.99 | -0.83 |
| p-Cresol | -4.5 | -3.91 | -0.59 |
| p-Cresyl diphenyl phosphate | -5.39 | -5.89 | 0.50 |
| p-Cymene | -0.39 | -0.58 | 0.19 |
| Pebulate | -3.01 | -3.39 | 0.38 |
| Pefurazoate | -6.65 | -8.62 | 1.97 |
| Pelargonic acid | -4.18 | -4.29 | 0.11 |
| Penconazole | -6.24 | -4.66 | -1.58 |
| Pencycuron | -9.25 | -8.42 | -0.83 |
| Penfenate | -4.03 | -3.41 | -0.62 |
| Penoxalin | -3.38 | -4.56 | 1.18 |
| Pentabromoanisole | -3.44 | -3.1 | -0.34 |
| Pentachloroanisole | -0.97 | -2.03 | 1.06 |
| Pentachlorobenzene | -1.54 | -1.44 | -0.10 |
| Pentachloroethane | -1 | -1 | 0.00 |
| Pentachlorophenol | -3.81 | -4.19 | 0.38 |
| Pentachlorotoluene | -1.39 | -1.53 | 0.14 |
| Pentadecane | 2.99 | 2.18 | 0.81 |
| Pentafluorobenzene | -0.27 | -0.09 | -0.18 |
| Pentamethylbenzene | -1.28 | -0.89 | -0.39 |
| Pentane | 1.75 | 0.68 | 1.07 |
| Pentanedioic acid | -10.67 | -9.99 | -0.68 |
| Pentanenitrile | -2.55 | -1.79 | -0.76 |
| Pentanoic acid | -4.72 | -4.33 | -0.39 |
| Penthiopyrad | -6.95 | -7.64 | 0.69 |
| Pentylcyclopentane | 1.87 | 0.8 | 1.07 |
| Perchlordecone | -1.48 | -2.74 | 1.26 |
| Perchlorobiphenyl | -3.13 | -2.97 | -0.16 |
| Perchlorocyclopentadiene | -0.17 | -0.37 | 0.20 |
| Perylene | -4.06 | -5.57 | 1.51 |
| Pethoxamid | -6.12 | -6.05 | -0.07 |
| Phenanthrene | -2.76 | -3.19 | 0.43 |
| Phenanthridine | -6.23 | -5.42 | -0.81 |
| Phenethyl alcohol | -4.98 | -4.5 | -0.48 |
| Phenmedipham | -10.11 | -9.86 | -0.25 |
| Phenol | -4.77 | -3.84 | -0.93 |
| Phenothrin | -5.54 | -4.62 | -0.92 |
| Phenylacetonitrile | -3.44 | -2.92 | -0.52 |
| Phenylhydrazine | -6.71 | -6.92 | 0.21 |
| Phenylmethanol | -4.62 | -4.51 | -0.11 |
| Phlorol | -4.14 | -3.9 | -0.24 |
| Phosphamide | -8.11 | -7.91 | -0.20 |
| Phthalic anhydride | -6.16 | -5.22 | -0.94 |
| Phthalthrin | -7.52 | -8.48 | 0.96 |
| Picoxystrobin | -6.53 | -5.22 | -1.31 |
| Pinacolone | -2.03 | -1.5 | -0.53 |
| Pinoxaden | -9.43 | -11 | 1.57 |
| Piperazine | -5.43 | -5.59 | 0.16 |
| Piperidine | -3.74 | -3.22 | -0.52 |
| Piperophos | -6.34 | -7.04 | 0.70 |
| Pirimicarb | -7.46 | -7.36 | -0.10 |
| Pirimiphos-ethyl | -4.52 | -4.78 | 0.26 |
| Pirimiphos-methyl | -4.91 | -5.02 | 0.11 |
| Plinol | -3.08 | -3.61 | 0.53 |
| p-Menthane | 1.86 | 1.06 | 0.80 |
| Preforan | -6.13 | -4.91 | -1.22 |
| Prehnitene | -0.86 | -0.87 | 0.01 |
| Pretilachlor | -5.96 | -6.12 | 0.16 |
| Prochloraz | -6.17 | -7.74 | 1.57 |
| Procymidone | -6.07 | -5.71 | -0.36 |
| Profluthrin | -1.79 | -2.68 | 0.89 |
| Promecarb | -5.44 | -5.75 | 0.31 |
| Prometon | -6.92 | -5.98 | -0.94 |
| Prometryn | -6.49 | -6.28 | -0.21 |
| Pronamide | -6.4 | -6.52 | 0.12 |
| Propachlor | -5.35 | -4.42 | -0.93 |
| Propafos | -5.93 | -5.71 | -0.22 |
| Propamocarb | -7.22 | -6.87 | -0.35 |
| Propanal | -2.35 | -2.11 | -0.24 |
| Propane | 1.43 | 0.38 | 1.05 |
| Propanenitrile | -2.93 | -1.81 | -1.12 |
| Propanil | -7.53 | -5.67 | -1.86 |
| Propanoic acid | -4.74 | -4.35 | -0.39 |
| Propanone | -2.77 | -1.99 | -0.78 |
| Propaquizafop | -9.9 | -8.52 | -1.38 |
| Propazine | -6.27 | -5.95 | -0.32 |
| Propenal | -2.79 | -2.12 | -0.67 |
| Propham | -5.13 | -4.68 | -0.45 |
| Propiconazole | -7.29 | -5.97 | -1.32 |
| Propisochlor | -5.14 | -4.77 | -0.37 |
| Propoxur | -6.99 | -5.93 | -1.06 |
| Propyl 2-hexyl-3-oxocyclopentanecarboxylate | -4.54 | -4.45 | -0.09 |
| Propyl 4-hydroxybenzoate | -6.63 | -5.92 | -0.71 |
| Propyl butyrate | -1.65 | -2.04 | 0.39 |
| Propyl propanoate | -1.86 | -2.06 | 0.20 |
| Propylcyclohexane | 1.62 | 0.63 | 0.99 |
| Propylcyclopentane | 1.56 | 0.5 | 1.06 |
| Propylene | 0.86 | 0.1 | 0.76 |
| Propyne | -0.27 | -0.53 | 0.26 |
| Prosulfocarb | -4.27 | -4.54 | 0.27 |
| Prothiofos | -2.92 | -2.94 | 0.02 |
| Prothoate | -7.36 | -7.29 | -0.07 |
| Pseudococaine | -8.79 | -7.68 | -1.11 |
| p-Toluidine | -4.04 | -4.13 | 0.09 |
| Pulegone | -2.84 | -2.74 | -0.10 |
| Pyrasulfotole | -10.65 | -9.53 | -1.12 |
| Pyrazon | -12.17 | -10.2 | -1.97 |
| Pyrazoxyfen | -5.14 | -6.78 | 1.64 |
| Pyrene | -3.7 | -4.37 | 0.67 |
| Pyridalyl | -3.9 | -4.16 | 0.26 |
| Pyridaphenthion | -8.1 | -9.02 | 0.92 |
| Pyridine | -3.44 | -3.11 | -0.33 |
| Pyrifenox | -5.76 | -5.47 | -0.29 |
| Pyrimethanil | -5.75 | -5.58 | -0.17 |
| Pyriminobac-methyl | -6.26 | -5.17 | -1.09 |
| Pyriminostrobin | -7.31 | -8.44 | 1.13 |
| Pyroquilon | -7.1 | -5.61 | -1.49 |
| Pyrrole | -3.15 | -3.84 | 0.69 |
| Pyrrolidine | -4.01 | -3.2 | -0.81 |
| Pyruvic acid | -6.88 | -6.26 | -0.62 |
| Quinalphos | -5.42 | -5.62 | 0.20 |
| Quinoclamine | -7.52 | -8.51 | 0.99 |
| Quinoline | -4.2 | -4.01 | -0.19 |
| Quinoxyfen | -4.21 | -5.2 | 0.99 |
| Quizalofop-Ethyl | -6.12 | -7.63 | 1.51 |
| R134a | 0.39 | 0.65 | -0.26 |
| Randox | -4.88 | -4.93 | 0.05 |
| Resmethrin | -4.86 | -4.27 | -0.59 |
| Ribitol | -15.06 | -15.18 | 0.12 |
| Sabinene | 0.42 | -0.15 | 0.57 |
| Salicylic acid | -6.27 | -6.2 | -0.07 |
| s-Butylacetate | -1.64 | -1.79 | 0.15 |
| s-Butylbenzene | -0.27 | -0.5 | 0.23 |
| s-Butylnitrate | -1.04 | -1.37 | 0.33 |
| Sebuthylazine | -6.32 | -6.3 | -0.02 |
| Secbumeton | -6.55 | -6.44 | -0.11 |
| Sethoxydim | -6.95 | -7.05 | 0.10 |
| Siduron | -8.56 | -8.17 | -0.39 |
| Simazine | -6.86 | -6.61 | -0.25 |
| Simeton | -7.8 | -6.76 | -1.04 |
| Simetryn | -7.56 | -6.96 | -0.60 |
| Sorbic acid | -6 | -4.75 | -1.25 |
| Sorbinaldehyde | -3.4 | -2.52 | -0.88 |
| Sorbitol | -18.21 | -17.99 | -0.22 |
| Sparticide | -3.28 | -5.2 | 1.92 |
| Spiromesifen | -4.94 | -5.92 | 0.98 |
| Spiroxamine | -3.39 | -3.12 | -0.27 |
| Stirofos | -6.77 | -6.14 | -0.63 |
| s-trans-1,3-Butadiene | 0.41 | 0.15 | 0.26 |
| Styrene | -0.81 | -0.76 | -0.05 |
| Styrene oxide | -3.03 | -2.83 | -0.20 |
| Sulfometuron-methyl | -14.77 | -12.9 | -1.87 |
| Sulprofos | -3.81 | -3.74 | -0.07 |
| t-Amyl acetate | -1.31 | -1.82 | 0.51 |
| tau-Fluvalinate | -7.32 | -8.69 | 1.37 |
| t-Butyl propionate | -1.27 | -1.75 | 0.48 |
| t-Butylacetate | -1.54 | -1.81 | 0.27 |
| t-Butylbenzene | -0.29 | -0.17 | -0.12 |
| t-Butylformate | -1.55 | -1.56 | 0.01 |
| TCBA | -6.06 | -5.68 | -0.38 |
| Tebuconazole | -7.92 | -7.4 | -0.52 |
| Tebuthiuron | -7.96 | -6.31 | -1.65 |
| Tedion | -3.92 | -3.72 | -0.20 |
| Teflubenzuron | -6.67 | -8.11 | 1.44 |
| Tembotrione | -10.68 | -11.41 | 0.73 |
| Teproloxydim | -8.11 | -8.42 | 0.31 |
| Terbacil | -8.15 | -6.77 | -1.38 |
| Terbufos | -3.47 | -3.79 | 0.32 |
| Terbumeton | -6.43 | -5.99 | -0.44 |
| Terbuthylazine | -6.03 | -5.85 | -0.18 |
| Terbutryne | -6.3 | -6.16 | -0.14 |
| Terpinolene | 0.03 | -0.5 | 0.53 |
| Tetrabromobisphenol A | -8.16 | -8.46 | 0.30 |
| Tetrachloroethylene | -0.15 | -0.59 | 0.44 |
| Tetrachloroveratrole | -2.35 | -2.55 | 0.20 |
| Tetradecane | 2.56 | 2.03 | 0.53 |
| Tetradisul | -3.16 | -2.91 | -0.25 |
| Tetrahydrofuran | -2.54 | -2.05 | -0.49 |
| Tetrahydropyran | -2.29 | -2.07 | -0.22 |
| Tetramethylene glycol | -6.77 | -6.53 | -0.24 |
| Thenylchlor | -6.48 | -6.34 | -0.14 |
| Thimet | -3.75 | -3.86 | 0.11 |
| Thioanisole | -2 | -2.03 | 0.03 |
| Thiobencarb | -4.74 | -4.6 | -0.14 |
| Thiofanocarb | -6.42 | -6.87 | 0.45 |
| Thionazin | -4.9 | -5.18 | 0.28 |
| Thiophene | -1.01 | -0.57 | -0.44 |
| Thiophos | -4.47 | -4.12 | -0.35 |
| Thioxamyl | -10.8 | -10.59 | -0.21 |
| TNT | -6.15 | -5.81 | -0.34 |
| Tolclofos-methyl | -3.23 | -3.04 | -0.19 |
| Tonalide | -2.29 | -3.01 | 0.72 |
| t-Pentylbenzene | -0.13 | -0.05 | -0.08 |
| Tralkoxydim | -7.57 | -7.56 | -0.01 |
| trans-1,2-Cycloheptyl dinitrate | -3.34 | -3.53 | 0.19 |
| trans-1,2-Cyclohexyl dinitrate | -3.11 | -3.51 | 0.40 |
| trans-1,2-Dichloroethylene | -0.66 | -0.59 | -0.07 |
| trans-1,2-Dimethylcyclohexane | 1.39 | 0.62 | 0.77 |
| trans-1,3-Cyclohexyl dinitrate | -3.23 | -3.51 | 0.28 |
| trans-1,3-Dichloropropene | -1.14 | -1.14 | 0.00 |
| trans-1,3-Dimethylcyclohexane | 1.52 | 0.62 | 0.90 |
| trans-1,4-Dichloro-2-butene | -1.57 | -1.7 | 0.13 |
| trans-1,4-Dimethylcyclohexane | 1.55 | 0.62 | 0.93 |
| trans-2,5-Dimethyltetrahydrofuran | -2.14 | -1.47 | -0.67 |
| trans-2-Butene | 0.96 | -0.05 | 1.01 |
| trans-2-Heptene | 1.25 | 0.16 | 1.09 |
| trans-2-Hexenal | -2.54 | -2.32 | -0.22 |
| trans-2-Hexene | 1.02 | 0.1 | 0.92 |
| trans-2-Methylcyclohexanol | -3.51 | -3.78 | 0.27 |
| trans-2-Octene | 1.57 | 0.22 | 1.35 |
| trans-2-Pentene | 0.98 | 0.04 | 0.94 |
| trans-4-Methylcyclohexanol | -3.8 | -3.78 | -0.02 |
| trans-Azobenzene | -3.26 | -4.46 | 1.20 |
| trans-Crotononitrile | -2.34 | -2.03 | -0.31 |
| trans-Decalin | 0.68 | 0.14 | 0.54 |
| Transfluthrin | -2.73 | -2.77 | 0.04 |
| trans-Geraniol | -3.82 | -3.77 | -0.05 |
| trans-Nerolidol | -2.76 | -3.49 | 0.73 |
| trans-Stilbene | -2.72 | -1.77 | -0.95 |
| Tri(2-chlorethyl)amine | -4.12 | -3.95 | -0.17 |
| Tri-2-butoxyethyl phosphate | -7.92 | -7.86 | -0.06 |
| Triadimenol | -8.5 | -8.28 | -0.22 |
| Triallate | -3.31 | -2.84 | -0.47 |
| Triallylamine | -1.97 | -1.77 | -0.20 |
| Triasulfuron | -12.3 | -10.32 | -1.98 |
| Triazamate | -8.33 | -9.58 | 1.25 |
| Triazothion | -6.36 | -6.31 | -0.05 |
| Tributyl phosphate | -4.59 | -4.14 | -0.45 |
| Tributylamine | -1.3 | -1.79 | 0.49 |
| Trichlopyr | -7.4 | -6.31 | -1.09 |
| Trichloroacetic acid | -6.26 | -4.72 | -1.54 |
| Trichloroacetonitrile | -0.23 | -2.18 | 1.95 |
| Trichloroethylene | -0.44 | -0.59 | 0.15 |
| Trichlorosyringol | -5.05 | -5.23 | 0.18 |
| Tricyclene | 0.92 | 0.56 | 0.36 |
| Tridecane | 2.07 | 1.88 | 0.19 |
| Tridecylamine | -2.35 | -3.29 | 0.94 |
| Tridemorph | -2.16 | -3.22 | 1.06 |
| Tridiphane | -2.71 | -3.36 | 0.65 |
| Triethyl phosphate | -5.53 | -4.2 | -1.33 |
| Triethylamine | -2.21 | -1.77 | -0.44 |
| Trifloxystrobin | -6.03 | -5.94 | -0.09 |
| Triflumizole | -5.77 | -5.72 | -0.05 |
| Trifluoroacetic acid | -2.08 | -3.79 | 1.71 |
| Trimethyl phosphate | -6.33 | -4.59 | -1.74 |
| Trimethylacetic acid | -3.94 | -3.87 | -0.07 |
| Trimethylamine | -2.35 | -2.16 | -0.19 |
| Trimethyleneglycol dinitrate | -3.51 | -3.26 | -0.25 |
| Trimethylethylene | 0.98 | 0.06 | 0.92 |
| Trinexapac-ethyl | -6.66 | -7.82 | 1.16 |
| Triphenyl phosphate | -4.61 | -5.82 | 1.21 |
| Tripropyl phosphate | -4.47 | -4.17 | -0.30 |
| Tripropylamine | -1.81 | -1.74 | -0.07 |
| Triptane | 2.1 | 1.6 | 0.50 |
| Tritac | -4.7 | -5.66 | 0.96 |
| Tycor | -6.45 | -7.12 | 0.67 |
| Undecane | 2.53 | 1.58 | 0.95 |
| Valencene | 0.1 | -0.06 | 0.16 |
| Valifenalate | -8.86 | -10.53 | 1.67 |
| Veratrole | -3.29 | -2.27 | -1.02 |
| Vernolate | -2.97 | -3.39 | 0.42 |
| Vinclozolin | -5.75 | -5.08 | -0.67 |
| Vinyl acetate | -1.69 | -1.56 | -0.13 |
| Vinylacetylene | 0 | -0.43 | 0.43 |
| Vinylidenechloride | 0.04 | -0.22 | 0.26 |
| Vitavax | -7.89 | -7.62 | -0.27 |
| Xylitol | -9.21 | -9.18 | -0.03 |
| Z-Caryophyllene | 0.04 | -0.06 | 0.10 |
| Zoocoumarin | -8 | -9.24 | 1.24 |
