# Supplementary material for: Calculation of the Three Partition Coefficients logPow, logKoa and logKaw of Organic Molecules at Standard Conditions at Once by Means of a Generally Applicable Group-Additivity Method
Source: Preprints.org preprint supplement (doi:10.20944/preprints202312.0275.v1), 2023-12-05
Supplement: Supplementary file 4 [file S07. Alkanes, Alkenes and Alkynes with Exp. vs. Calc. logKaw Values.doc]

| **Molecule name** | **logKaw exp** | **logKaw calc** | **Deviation** |
| --- | --- | --- | --- |
| 1,1,3-Trimethylcyclopentane | 1.81 | 0.97 | 0.84 |
| 1,3,5-Cycloheptatriene | -0.74 | -0.97 | 0.23 |
| 1,4-Cyclohexadiene | -0.51 | -0.81 | 0.30 |
| 1,4-Pentadiene | 0.68 | 0.21 | 0.47 |
| 1,5-Hexadiene | 0.74 | 0.27 | 0.47 |
| 1,6-Heptadiene | 0.86 | 0.38 | 0.48 |
| 1,6-Heptadiyne | -1.06 | -0.88 | -0.18 |
| 1,8-Nonadiyne | -0.87 | -0.76 | -0.11 |
| 1-Butene | 0.98 | 0.16 | 0.82 |
| 1-Butyne | -0.14 | -0.47 | 0.33 |
| 1-Decene | 1.60 | 0.55 | 1.05 |
| 1-Heptene | 1.22 | 0.34 | 0.88 |
| 1-Heptyne | 0.44 | -0.26 | 0.70 |
| 1-Hexene | 1.16 | 0.28 | 0.88 |
| 1-Hexyne | 0.19 | -0.35 | 0.54 |
| 1-Methyl-4-isopropylcyclohexene | -0.07 | -0.17 | 0.10 |
| 1-Methylcyclohexene | 0.49 | -0.56 | 1.05 |
| 1-Nonene | 1.51 | 0.46 | 1.05 |
| 1-Nonyne | 0.77 | -0.14 | 0.91 |
| 1-Octyne | 0.52 | -0.20 | 0.72 |
| 1-Pentadecene | 2.25 | 0.85 | 1.40 |
| 1-Pentene | 1.22 | 0.25 | 0.97 |
| 1-Pentyne | -0.12 | -0.41 | 0.29 |
| 1-trans-5-trans-9-cis-Cyclododecatriene | 0.36 | -0.68 | 1.04 |
| 2,2,3,3-Tetramethylbutane | 1.99 | 2.08 | -0.09 |
| 2,2,3-Trimethylhexane | 2.34 | 1.90 | 0.44 |
| 2,2,3-Trimethylpentane | 1.92 | 1.75 | 0.17 |
| 2,2,5,5-Tetramethyl-3-hexyne | 1.08 | 0.51 | 0.57 |
| 2,2,5-Trimethyl-3-hexyne | 0.87 | 0.11 | 0.75 |
| 2,2,5-Trimethylhexane | 2.33 | 1.90 | 0.43 |
| 2,2,6,6-Tetramethylheptane | 2.63 | 2.50 | 0.13 |
| 2,2-Dimethyl-3-hexyne | 0.45 | -0.08 | 0.53 |
| 2,2-Dimethylheptane | 2.32 | 1.76 | 0.56 |
| 2,2-Dimethylhexane | 2.22 | 1.61 | 0.61 |
| 2,2-Dimethyloctane | 2.42 | 1.91 | 0.51 |
| 2,2-Dimethylpentane | 2.11 | 1.46 | 0.65 |
| 2,2-Dimethylpropane | 1.83 | 1.14 | 0.69 |
| 2,3,4-Trimethylhexane | 2.36 | 1.71 | 0.65 |
| 2,3,4-Trimethylpentane | 1.88 | 1.56 | 0.32 |
| 2,3-Dimethyl-1,3-butadiene | 0.29 | 0.36 | -0.07 |
| 2,3-Dimethylbutane | 1.70 | 1.09 | 0.61 |
| 2,3-Dimethylheptane | 2.34 | 1.57 | 0.77 |
| 2,3-Dimethylpentane | 1.85 | 1.27 | 0.58 |
| 2,4,6-Trimethyloctane | 2.60 | 2.01 | 0.59 |
| 2,4-Dimethylheptane | 2.29 | 1.57 | 0.72 |
| 2,4-Dimethylhexane | 2.16 | 1.42 | 0.74 |
| 2,4-Dimethylpentane | 1.99 | 1.27 | 0.72 |
| 2,5-Dimethyl-2,4-hexadiene | 0.28 | 0.06 | 0.22 |
| 2,5-Dimethylheptane | 2.30 | 1.57 | 0.73 |
| 2,5-Dimethylhexane | 2.17 | 1.42 | 0.75 |
| 2,6-Dimethylheptane | 2.32 | 1.57 | 0.75 |
| 2,7-Dimethyloctane | 2.53 | 1.72 | 0.81 |
| 2-Heptyne | 0.36 | -0.60 | 0.96 |
| 2-Methyl-1-pentene | 1.08 | 0.33 | 0.75 |
| 2-Methyl-3-hexyne | 0.27 | -0.46 | 0.73 |
| 2-Methylheptane | 2.15 | 1.28 | 0.87 |
| 2-Methylhexane | 2.11 | 1.13 | 0.98 |
| 2-Methylpentane | 1.84 | 0.98 | 0.86 |
| 2-Methylpropane | 1.65 | 0.66 | 0.99 |
| 3,3-Dimethylheptane | 2.34 | 1.76 | 0.57 |
| 3,3-Dimethylpentane | 1.88 | 1.46 | 0.42 |
| 3,4-Dimethylhexane | 2.22 | 1.42 | 0.80 |
| 3,5-Dimethylheptane | 2.29 | 1.57 | 0.72 |
| 3-Carene | 0.15 | -0.36 | 0.51 |
| 3-Ethylheptane | 2.33 | 1.43 | 0.90 |
| 3-Ethylhexane | 2.24 | 1.28 | 0.96 |
| 3-Hexyne | -0.13 | -0.66 | 0.53 |
| 3-Isopropylhexane | 2.34 | 1.57 | 0.76 |
| 3-Methyl-1-butene | 1.34 | 0.39 | 0.95 |
| 3-Methylheptane | 2.12 | 1.28 | 0.84 |
| 3-Methylhexane | 1.99 | 1.13 | 0.86 |
| 3-Methylnonane | 2.39 | 1.58 | 0.81 |
| 3-Methylpentane | 1.83 | 0.96 | 0.87 |
| 4,4-Diethylheptane | 2.62 | 2.04 | 0.58 |
| 4,4-Dimethylheptane | 2.34 | 1.76 | 0.58 |
| 4-Ethyl-2-methylhexane | 2.30 | 1.57 | 0.73 |
| 4-Ethylheptane | 2.31 | 1.43 | 0.88 |
| 4-Methyl-1-pentene | 1.40 | 0.45 | 0.95 |
| 4-Methylheptane | 2.18 | 1.28 | 0.90 |
| 4-Methylnonane | 2.42 | 1.58 | 0.84 |
| 4-Methyloctane | 2.61 | 1.43 | 1.18 |
| 4-Propyloctane | 2.60 | 1.73 | 0.87 |
| 4-Vinylcyclohexene | 0.26 | -0.37 | 0.63 |
| 5-Ethylidene-2-norbornene | -0.32 | -1.04 | 0.72 |
| alpha-Farnesene | 0.08 | 0.31 | -0.23 |
| alpha-Humulene | 0.14 | 0.03 | 0.11 |
| alpha-Neoclovene | 0.14 | -0.12 | 0.26 |
| alpha-Phellandrene | 0.35 | -0.26 | 0.61 |
| alpha-Pinene | 0.74 | -0.43 | 1.17 |
| alpha-Terpinene | -0.15 | -0.45 | 0.30 |
| beta-Phellandrene | 0.35 | -0.07 | 0.42 |
| Butane | 1.53 | 0.53 | 1.00 |
| Camphene | 0.23 | -0.25 | 0.48 |
| Caprylene | 1.40 | 0.40 | 1.00 |
| Cedrene | 0.15 | -0.22 | 0.37 |
| cis- Cyclooctene | 0.29 | -0.56 | 0.85 |
| cis-1,2-Dimethylcyclohexane | 1.17 | 0.62 | 0.55 |
| cis-2-Butene | 0.98 | -0.02 | 1.00 |
| cis-2-Hexene | 1.01 | 0.10 | 0.91 |
| cis-2-Octene | 1.54 | 0.22 | 1.32 |
| cis-2-Pentene | 0.96 | 0.04 | 0.92 |
| Cyclogeraniolane | 1.64 | 1.10 | 0.53 |
| Cycloheptane | 0.65 | 0.11 | 0.54 |
| Cycloheptene | 0.28 | -0.60 | 0.88 |
| Cyclohexane | 0.88 | -0.01 | 0.89 |
| Cyclohexene | 0.07 | -0.68 | 0.75 |
| Cyclooctane | 0.74 | 0.23 | 0.51 |
| Cyclopentadiene | -0.07 | -0.84 | 0.77 |
| Cyclopentane | 0.84 | -0.13 | 0.97 |
| Cyclopentene | 0.25 | -0.68 | 0.93 |
| Cyclopropane | 0.53 | -0.37 | 0.90 |
| Decane | 2.32 | 1.43 | 0.89 |
| Diacetylene | -0.66 | -1.06 | 0.40 |
| Diisobutylene | 2.00 | 0.91 | 1.09 |
| Dodecane | 2.53 | 1.73 | 0.80 |
| E-beta-Caryophyllene | 0.04 | -0.06 | 0.10 |
| Ethane | 1.33 | 0.23 | 1.10 |
| Ethene | 0.83 | 0.25 | 0.58 |
| Ethylcyclohexane | 1.30 | 0.48 | 0.82 |
| Ethyne | -0.01 | -0.22 | 0.21 |
| exo-Dicyclopentadiene | -0.36 | -1.46 | 1.10 |
| gamma-Terpinene | 0.02 | -0.36 | 0.38 |
| Heptane | 1.96 | 0.98 | 0.98 |
| Heptylcyclohexane | 1.82 | 1.23 | 0.59 |
| Hexane | 1.85 | 0.83 | 1.02 |
| Isobutene | 0.85 | 0.17 | 0.68 |
| Isooctane | 2.12 | 1.75 | 0.37 |
| Isopentane | 1.70 | 0.83 | 0.87 |
| Isopentene | 1.25 | 0.27 | 0.98 |
| Isoprene | 0.49 | 0.22 | 0.27 |
| Isosativene | 0.01 | -0.33 | 0.34 |
| Longipinene | 0.08 | -0.33 | 0.41 |
| Methylcyclohexane | 1.19 | 0.27 | 0.92 |
| Methylcyclopentane | 1.13 | 0.15 | 0.98 |
| Myrcene | 0.42 | 0.40 | 0.02 |
| Neohexane | 1.85 | 1.29 | 0.56 |
| Nonane | 2.24 | 1.28 | 0.96 |
| Nopinene | 0.28 | -0.25 | 0.53 |
| Octane | 2.07 | 1.13 | 0.94 |
| Octylcyclohexane | 2.02 | 1.38 | 0.64 |
| Pentadecane | 2.99 | 2.18 | 0.81 |
| Pentane | 1.75 | 0.68 | 1.07 |
| Pentylcyclopentane | 1.87 | 0.80 | 1.07 |
| p-Menthane | 1.86 | 1.06 | 0.80 |
| Propane | 1.43 | 0.38 | 1.05 |
| Propylcyclohexane | 1.62 | 0.63 | 0.99 |
| Propylcyclopentane | 1.56 | 0.50 | 1.06 |
| Propylene | 0.86 | 0.10 | 0.76 |
| Propyne | -0.27 | -0.53 | 0.26 |
| Sabinene | 0.42 | -0.15 | 0.57 |
| s-trans-1,3-Butadiene | 0.41 | 0.15 | 0.26 |
| Terpinolene | 0.03 | -0.50 | 0.53 |
| Tetradecane | 2.56 | 2.03 | 0.53 |
| trans-1,2-Dimethylcyclohexane | 1.39 | 0.62 | 0.77 |
| trans-1,3-Dimethylcyclohexane | 1.52 | 0.62 | 0.90 |
| trans-1,4-Dimethylcyclohexane | 1.55 | 0.62 | 0.93 |
| trans-2-Butene | 0.96 | -0.05 | 1.01 |
| trans-2-Heptene | 1.25 | 0.16 | 1.09 |
| trans-2-Hexene | 1.02 | 0.10 | 0.92 |
| trans-2-Octene | 1.57 | 0.22 | 1.35 |
| trans-2-Pentene | 0.98 | 0.04 | 0.94 |
| trans-Decalin | 0.68 | 0.14 | 0.54 |
| Tricyclene | 0.92 | 0.56 | 0.36 |
| Tridecane | 2.07 | 1.88 | 0.19 |
| Trimethylethylene | 0.98 | 0.06 | 0.92 |
| Triptane | 2.10 | 1.60 | 0.50 |
| Undecane | 2.53 | 1.58 | 0.95 |
| Valencene | 0.10 | -0.06 | 0.16 |
| Vinylacetylene | 0.00 | -0.43 | 0.43 |
| Z-Caryophyllene | 0.04 | -0.06 | 0.10 |
