# Supplementary material for: Calculation of the Three Partition Coefficients logPow, logKoa and logKaw of Organic Molecules at Standard Conditions at Once by Means of a Generally Applicable Group-Additivity Method
Source: Preprints.org preprint supplement (doi:10.20944/preprints202312.0275.v1), 2023-12-05
Supplement: Supplementary file 5 [file S08. Outliers of logPow.doc]

| **Outliers of logPow** |  |  |  |
| --- | --- | --- | --- |
| **Name** | **logPow exp** | **logPow calc** | **Diff.** |
| Pyridine-N-oxide | -1.69 | 3.67 | -5.36 |
| Roxithromycin | 3.79 | -0.06 | 3.85 |
| 2-Methyl-4-nitroquinoline-1-oxide | 1.25 | -2.49 | 3.74 |
| Azithromycin | 4.02 | 0.29 | 3.73 |
| Phthalide | 0.80 | 3.97 | -3.17 |
| 8-Azaadenine | -0.96 | 2.09 | -3.05 |
| Erythromycin | 2.54 | -0.29 | 2.83 |
| 2-Methylbenzaldoxime | 2.53 | -0.21 | 2.74 |
| Amitrole | -0.87 | 1.83 | -2.70 |
| Clarithromycin | 3.16 | 0.70 | 2.46 |
| 8-Azaguanine | -0.71 | 1.61 | -2.32 |
| Benzaldoxime | 1.75 | -0.54 | 2.29 |
| Altretamine | 2.73 | 0.51 | 2.22 |
| Dithianon | 2.84 | 0.62 | 2.22 |
| Anilazine | 3.00 | 5.20 | -2.20 |
| Flupyrsulfuron-methyl | 1.30 | 3.50 | -2.20 |
| Diacetylmorphine | 1.59 | 3.76 | -2.17 |
| 2-Carboxypyridine | -1.98 | 0.15 | -2.13 |
| Cefatrizine | -2.24 | -0.15 | -2.09 |
| Sulfamethizole | 0.54 | 2.60 | -2.06 |
| Benzo-1,2,3-triazole | 1.34 | 3.40 | -2.06 |
| 5-Ethyl-6-azauracil | 0.22 | 2.24 | -2.02 |
| 6-Azauridine | -2.14 | -4.15 | 2.01 |
| p-Nonylphenyl diphenyl phosphate | 5.90 | 7.90 | -2.00 |
| Cephalexin | 0.65 | -1.34 | 1.99 |
| Bendiocarb | 1.70 | 3.69 | -1.99 |
| 4-Pyrimidinol | -1.38 | 0.60 | -1.98 |
| Carbomycin | 3.04 | 1.06 | 1.98 |
| 4-Amino-3-(methylthio)-1,2,4-triazin-5-one | 0.38 | -1.59 | 1.97 |
| Tylosin | 1.63 | -0.34 | 1.97 |
| Oryzalin | 3.73 | 1.83 | 1.90 |
| Propiolactone | -1.36 | 0.53 | -1.89 |
| Spironolactone | 2.78 | 4.66 | -1.88 |
| 6-Acetylmorphine | 1.55 | 3.40 | -1.85 |
| beta-Butyrolactone | -0.84 | 1.00 | -1.84 |
| Hydromorphone | 0.90 | 2.71 | -1.81 |
| Pyrazin-2-one | -1.49 | -3.29 | 1.80 |
| Tazemetostat | 2.82 | 4.60 | -1.78 |
| Cephalothin | -0.20 | 1.57 | -1.77 |
| Molibresib | 2.80 | 4.55 | -1.75 |
| Etorphine | 2.79 | 4.54 | -1.75 |
| Verapamil | 3.79 | 5.54 | -1.75 |
| 1-Hexadecyl-3-methylimidazolium bromide | 10.42 | 8.72 | 1.70 |
| Doxorubicin | 0.65 | -1.03 | 1.68 |
| 2-Aminobenzenethiol | 3.00 | 1.32 | 1.68 |
| 1-Ethyl-3-methylimidazolium trifluoroacetate | 1.95 | 0.29 | 1.66 |
| Cetylpyridinium chloride | 9.61 | 7.95 | 1.66 |
| Acetaldoxime | -0.18 | -1.83 | 1.65 |
| Rubeanic acid | -0.44 | -2.08 | 1.64 |
| Profluralin | 6.34 | 4.71 | 1.63 |
| 1-Pentadecanol | 7.11 | 5.52 | 1.59 |
| Pentazocine | 3.31 | 4.90 | -1.59 |
| 1-Bromodecane | 6.43 | 4.84 | 1.59 |
| Dihydro-5-methyl-2(3H)-furanone | -0.28 | 1.30 | -1.58 |
| 6-Aminonicotinamide | 0.70 | -0.86 | 1.56 |
| Codeine | 1.19 | 2.75 | -1.56 |
| Colchicine | 1.30 | 2.85 | -1.55 |
| Aldicarb | 1.13 | -0.42 | 1.55 |
| Uric acid | -1.11 | 0.44 | -1.55 |
| Morphine | 0.89 | 2.43 | -1.54 |
| Sulfadimethoxine | 1.63 | 3.13 | -1.50 |
| 5-Ethyldihydro-2(3H)-furanone | 0.24 | 1.73 | -1.49 |
| 2-Amino-4-chlorothiophenol | 3.33 | 1.85 | 1.48 |
| Valerolactone | -0.35 | 1.13 | -1.48 |
| Butyrolactone | -0.64 | 0.83 | -1.47 |
| Disopyramide | 2.37 | 3.84 | -1.47 |
| 4-Amino-1,2,4-triazole | -1.38 | 0.08 | -1.46 |
| 7H-Benzimidazo(2,1-a)benzo(de)isoquinolin-7-one | 1.76 | 3.22 | -1.46 |
| 1-Tetradecanol | 6.54 | 5.09 | 1.45 |
| Enoxacin | 2.30 | 0.86 | 1.44 |
| O,O'-Dimethyl-O''-(benzothien-3-yl)glyoxylonitrile oximino phosphate | 0.76 | -0.67 | 1.43 |
| Propiconazole | 3.50 | 4.93 | -1.43 |
| Omeprazole | 2.23 | 0.82 | 1.41 |
| Tetracaine | 3.73 | 2.34 | 1.39 |
| Dihydro-3-methyl-2(3H)-furanone | -0.28 | 1.11 | -1.39 |
| Terazosin | 2.29 | 0.90 | 1.39 |
| Phenprocoumon | 3.62 | 5.00 | -1.38 |
| Helenalin | 0.87 | 2.24 | -1.37 |
| Steroid09 | 3.13 | 4.49 | -1.36 |
| 1,4-Dicyanobutane | -0.32 | 1.04 | -1.36 |
| 1-Hexadecyl-3-methylimidazolium chloride | 10.08 | 8.72 | 1.36 |
| Mirex | 5.28 | 6.62 | -1.34 |
| Cefadroxil | -0.40 | -1.74 | 1.34 |
| Telmisartan | 7.73 | 6.40 | 1.33 |
| Furosemide | 2.56 | 1.23 | 1.33 |
| 9-Carboxy-9,10-dihydroanthracene | 2.67 | 4.00 | -1.33 |
| Glutaronitrile | -0.72 | 0.61 | -1.33 |
| 1-Tridecanol | 5.97 | 4.66 | 1.31 |
| Pentafluorophenol | 3.23 | 1.92 | 1.31 |
| 3-Hydroxypicolinamide | 0.65 | -0.65 | 1.30 |
| Xamoterol | 0.61 | -0.69 | 1.30 |
| Vinylchloride | 2.79 | 1.50 | 1.29 |
| 4-Hydroxyquinoline | 0.58 | 1.87 | -1.29 |
| 5-Butyldihydro-2(3H)-furanone | 1.30 | 2.59 | -1.29 |
| Dodecylbromide | 6.98 | 5.70 | 1.28 |
| Buprenorphine | 4.82 | 6.10 | -1.28 |
| Ouabain | -1.70 | -0.43 | -1.27 |
| Adipic dihydrazide | -2.88 | -1.62 | -1.26 |
| 3,4-Dimethoxythiophenol | 3.32 | 2.06 | 1.26 |
| Acarin | 4.28 | 5.53 | -1.25 |
| 4-Nitromethylhippuric acid | 0.98 | -0.27 | 1.25 |
| Buquinolate | 2.18 | 3.42 | -1.24 |
| Sulfapyridine | -0.02 | 1.21 | -1.23 |
| Dibenzoyl | 3.38 | 2.15 | 1.23 |
| Adenosine | -1.05 | -2.28 | 1.23 |
| Fluazuron | 5.10 | 6.32 | -1.22 |
| 1-Decanol | 4.57 | 3.37 | 1.20 |
| 4-Isothiocyanatodiphenylsulfoxide | 4.40 | 3.20 | 1.20 |
| n-Octadecanoic acid | 8.23 | 7.04 | 1.19 |
| Imazalil | 3.82 | 2.63 | 1.19 |
| Mefruside | 1.54 | 0.36 | 1.18 |
| Methohexital | 2.80 | 1.64 | 1.16 |
| Chlorfenvinphos | 3.10 | 4.26 | -1.16 |
| Primidone | 0.91 | 2.06 | -1.15 |
| Probenecid | 3.21 | 2.07 | 1.14 |
| O,O'-Diisopropyl-O''-(2-methoxycarbonylbenzofuran-3-yl)glyoxylonitrile oximino phosphate | 1.36 | 0.23 | 1.13 |
| Cefotaxime | -1.36 | -0.26 | -1.10 |
| Didanosine | -1.24 | -0.16 | -1.08 |
| Doxycycline | 0.42 | -0.62 | 1.04 |
| 2,5-Dibromo-3,4-hexanedione | 0.20 | 1.24 | -1.04 |
| Tilmicosin | 3.80 | 2.85 | 0.95 |
| Phosphoric acid | -0.77 | not evaluable |  |
| Sorbose-6-phosphate | 0.38 | not evaluable |  |
| Tetrabutyl silicate | 5.61 | not evaluable |  |
| Cytidine monophosphate | 0.44 | not evaluable |  |
