# Supplementary material for: Calculation of the Three Partition Coefficients logPow, logKoa and logKaw of Organic Molecules at Standard Conditions at Once by Means of a Generally Applicable Group-Additivity Method
Source: Preprints.org preprint supplement (doi:10.20944/preprints202312.0275.v1), 2023-12-05
Supplement: Supplementary file 6 [file S09. Outliers of logKoa.doc]

| **Outliers of logKoa** |  |  |  |
| --- | --- | --- | --- |
| **Name** | **logKoa exp** | **logKoa calc** | **Diff** |
| Metosulam | 16.74 | 9.29 | 7.45 |
| 2,2'-Azobisisobutyronitrile | 4.69 | 12.02 | -7.33 |
| Flurtamone | 14.44 | 8.32 | 6.12 |
| Gibberellic acid | 10.32 | 16.22 | -5.90 |
| Aldoxycarb S,S-dioxide | 6.01 | 11.69 | -5.68 |
| Fluazinam | 6.94 | 12.15 | -5.21 |
| Tricyclazole | 10.28 | 5.80 | 4.48 |
| Thiazopyr | 8.62 | 13.03 | -4.41 |
| Galactitol | 13.99 | 9.93 | 4.06 |
| tau-Fluvalinate | 11.43 | 15.43 | -4.00 |
| Decachlorodiphenyl ether | 8.24 | 12.17 | -3.93 |
| Thiencarbazone-methyl | 9.66 | 13.57 | -3.91 |
| Metaldehyde | 2.75 | 6.54 | -3.79 |
| 4-Cyanophenol | 10.51 | 6.87 | 3.64 |
| Flumetralin | 8.37 | 11.76 | -3.39 |
| Bixafen | 10.54 | 13.88 | -3.34 |
| Dodecamethylpentasiloxane | 2.29 | 5.52 | -3.23 |
| Phenazopyridine | 14.05 | 10.86 | 3.19 |
| Quizalofop-P-ethyl | 11.23 | 14.40 | -3.17 |
| Salicylaldehyde | 8.70 | 5.61 | 3.09 |
| Warfarin | 10.34 | 13.37 | -3.03 |
| Phosmet | 8.48 | 11.41 | -2.93 |
| Milbemycin a-4 | 16.13 | 19.04 | -2.91 |
| Profluralin | 7.72 | 10.61 | -2.89 |
| Ethirimol | 8.83 | 11.68 | -2.85 |
| Chlorpromazine | 13.32 | 10.49 | 2.83 |
| Diphacinone | 12.29 | 15.11 | -2.82 |
| Prodiamine | 7.59 | 10.33 | -2.74 |
| Dimethipin | 8.43 | 5.70 | 2.73 |
| Fluopicolide | 10.12 | 12.80 | -2.68 |
| Buprofezin | 8.88 | 11.49 | -2.61 |
| Acrinathrin | 10.61 | 13.19 | -2.58 |
| Fluazifop | 13.76 | 11.22 | 2.54 |
| Fluchloralin | 7.63 | 10.16 | -2.53 |
| Imazamox | 14.38 | 16.89 | -2.51 |
| Aminocyclopyrachlor | 8.91 | 11.38 | -2.47 |
| Metazachlor | 9.14 | 6.67 | 2.47 |
| Spiromesifen | 9.46 | 11.91 | -2.45 |
| Daimuron | 10.00 | 12.43 | -2.43 |
| Chloridazon | 12.85 | 10.44 | 2.41 |
| Thiazafluron | 9.22 | 6.82 | 2.40 |
| Paraldehyde | 3.09 | 5.44 | -2.35 |
| Benfluralin | 7.50 | 9.81 | -2.31 |
| Oxadixyl | 10.12 | 7.81 | 2.31 |
| Chlorflurenol-methyl | 9.17 | 11.42 | -2.25 |
| Fenoxanil | 13.32 | 11.07 | 2.25 |
| Valifenalate | 11.63 | 13.86 | -2.23 |
| Diclofop | 13.75 | 11.57 | 2.18 |
| 4-CPA | 10.11 | 7.94 | 2.17 |
| Isoxaflutole | 9.77 | 11.93 | -2.16 |
| 4-Nitrophenol | 9.23 | 7.09 | 2.14 |
| Imazaquin | 15.88 | 18.01 | -2.13 |
| Fluoxastrobin | 12.91 | 10.79 | 2.12 |
| Hydroprene | 9.36 | 7.24 | 2.12 |
| 8-Hydroxyquinoline | 6.57 | 8.67 | -2.10 |
| Dicyclopentadiene | 3.18 | 5.27 | -2.09 |
| Isoxaben | 10.64 | 8.56 | 2.08 |
| Nuarimol | 9.94 | 12.00 | -2.06 |
| Perfluoroethane | -0.69 | 1.37 | -2.06 |
| Bendiocarb | 7.14 | 9.19 | -2.05 |
| Flumetsulam | 13.19 | 11.14 | 2.05 |
| Ethalfluralin | 7.53 | 9.55 | -2.02 |
| Quizalofop-Ethyl | 10.72 | 12.74 | -2.02 |
| Methomyl | 8.80 | 6.79 | 2.01 |
| Lactofen | 10.58 | 12.56 | -1.98 |
| Fuberidazole | 11.07 | 9.10 | 1.97 |
| Dichlorprop | 10.68 | 8.72 | 1.96 |
| Dimethirimol | 8.81 | 10.76 | -1.95 |
| Fampridine | 7.99 | 6.06 | 1.93 |
| MCPA | 10.28 | 8.36 | 1.92 |
| Fluoroimide | 5.49 | 7.38 | -1.89 |
| Trifluralin | 7.93 | 9.81 | -1.88 |
| Dichlorophen | 14.33 | 12.48 | 1.85 |
| Triflumizole | 10.90 | 9.06 | 1.84 |
| Propetamphos | 9.14 | 7.32 | 1.82 |
| 1-Methylindole | 6.76 | 4.96 | 1.80 |
| 6-Hydroxy-2,2',3,3',4,6'-hexabromodiphenylether | 12.30 | 14.10 | -1.80 |
| Bensulfuron-methyl | 14.38 | 16.17 | -1.79 |
| 1,2-Phenylenediamine | 5.64 | 7.43 | -1.79 |
| Phenacetin | 9.59 | 7.82 | 1.77 |
| 2,2',3,3',4,4',5,5',6-Nonachlorodiphenyl ether | 9.81 | 11.56 | -1.75 |
| Ethametsulfuron-methyl | 14.28 | 16.02 | -1.74 |
| Furametpyr | 12.18 | 13.92 | -1.74 |
| Propanil | 10.38 | 8.64 | 1.74 |
| 2,2',3,4,4',5',6-Heptabromodiphenylether | 14.40 | 12.67 | 1.73 |
| Diallate | 8.84 | 7.11 | 1.73 |
| Pefurazoate | 9.46 | 11.19 | -1.73 |
| 3-Nitrophenol | 8.81 | 7.09 | 1.72 |
| Iprovalicarb | 11.69 | 13.40 | -1.71 |
| Iprodione | 10.76 | 12.46 | -1.70 |
| 5-Hydroxy-2,2',4,4',5'-pentabromodiphenylether | 11.47 | 13.17 | -1.70 |
| Benodanil | 9.57 | 11.26 | -1.69 |
| Tembotrione | 12.47 | 14.16 | -1.69 |
| Tribenuron-methyl | 11.09 | 12.77 | -1.68 |
| Salithion | 4.98 | 6.66 | -1.68 |
| 3-Cyanophenol | 8.43 | 6.80 | 1.63 |
| 4-Nitroaniline | 8.41 | 6.79 | 1.62 |
| Benzylaminopurine | 12.86 | 11.24 | 1.62 |
| 2,4-D | 10.15 | 8.54 | 1.61 |
| Bis(2-ethylhexyl)phthalate | 10.48 | 12.09 | -1.61 |
| Diclobutrazol | 11.00 | 9.40 | 1.60 |
| Picric acid | 9.99 | 8.39 | 1.60 |
| 4-Hydroxybenzaldehyde | 8.75 | 7.15 | 1.60 |
| Trinexapac-ethyl | 7.92 | 9.49 | -1.57 |
| 2'-Hydroxy-2,3',4,5'-tetrabromodiphenylether | 10.68 | 12.24 | -1.56 |
| Triazamate | 10.75 | 12.30 | -1.55 |
| Butanedinitrile | 5.16 | 3.61 | 1.55 |
| Maleic hydrazide | 9.01 | 7.46 | 1.55 |
| 2,2-Dichloroethanol | 3.14 | 4.68 | -1.54 |
| Chlordecone | 10.87 | 9.33 | 1.54 |
| 2,4-Dinitrophenol | 6.98 | 8.51 | -1.53 |
| 4-Hydroxy-3-nitrobenzaldehyde | 5.53 | 7.03 | -1.50 |
| 2,2',3,3',4,4',5,5'-Octachlorodiphenyl ether | 9.47 | 10.96 | -1.49 |
| Imazalil | 10.38 | 8.89 | 1.49 |
| Ethyl 4-(4-chloro-2-methylphenoxy)butanoate | 9.15 | 7.67 | 1.48 |
| Trichloroacetonitrile | 2.34 | 3.81 | -1.47 |
| 2,2,2-Trifluoroethylacetate | 1.56 | 3.02 | -1.46 |
| Azinphos-methyl | 10.83 | 9.38 | 1.45 |
| trans-Azobenzene | 7.06 | 8.49 | -1.43 |
| Cymoxanil | 7.75 | 9.18 | -1.43 |
| 3,5-Dichlorophenol | 8.28 | 6.86 | 1.42 |
| Cyhalofop-butyl | 9.23 | 10.64 | -1.41 |
| 5-Hydroxy-2,2',4,4'-tetrabromodiphenylether | 10.82 | 12.23 | -1.41 |
| N-Methyl-N-nitrosobenzenemethanamine | 5.15 | 6.56 | -1.41 |
| 6-Hydroxy-2,2',4,4'-tetrabromodiphenylether | 10.83 | 12.23 | -1.40 |
| Fenpropathrin | 9.37 | 10.77 | -1.40 |
| Dichloroacetic acid | 7.14 | 5.76 | 1.38 |
| p-tert-Butylphenyl diphenyl phosphate | 9.62 | 10.94 | -1.32 |
| Amitraz | 10.11 | 9.04 | 1.07 |
| Imidacloprid | 12.94 | not calc. |  |
| Nitroguanidine | 11.93 | not calc. |  |
