# Supplementary material for: Calculation of the Three Partition Coefficients logPow, logKoa and logKaw of Organic Molecules at Standard Conditions at Once by Means of a Generally Applicable Group-Additivity Method
Source: Preprints.org preprint supplement (doi:10.20944/preprints202312.0275.v1), 2023-12-05
Supplement: Supplementary file 7 [file S10. Outliers of logKaw.doc]

| **Outliers of logKaw** |  |  |  |
| --- | --- | --- | --- |
| **Name** | **logKaw exp** | **logKaw calc** | **Diff** |
| Metosulam | -15.50 | -6.41 | -9.09 |
| Flurtamone | -11.59 | -4.94 | -6.65 |
| Tris-BP | -2.97 | -8.64 | 5.67 |
| Flumetsulam | -14.56 | -9.13 | -5.43 |
| Pyriftalid | -8.80 | -4.60 | -4.20 |
| Phenazopyridine | -11.37 | -7.22 | -4.15 |
| Fluazifop | -10.93 | -6.89 | -4.04 |
| Gibberellic acid | -10.53 | -14.55 | 4.02 |
| profluralin | -1.92 | -5.89 | 3.97 |
| Nitralin | -6.18 | -9.95 | 3.77 |
| Thiazafluron | -7.63 | -3.96 | -3.67 |
| 3-Amino-1H-1,2,4-triazole | -9.60 | -5.98 | -3.62 |
| fluazinam | -2.91 | -6.52 | 3.61 |
| flumetralin | -2.75 | -6.28 | 3.53 |
| Acetoacetanilide | -8.94 | -5.45 | -3.49 |
| benefin | -2.04 | -5.22 | 3.18 |
| Triapenthenol | -8.00 | -4.91 | -3.09 |
| Methomyl | -9.07 | -5.99 | -3.08 |
| AKD2023 | -4.45 | -7.49 | 3.04 |
| Isoxaflutole | -7.70 | -10.74 | 3.04 |
| Ferimzone | -8.25 | -5.23 | -3.02 |
| fluchloralin | -2.94 | -5.95 | 3.01 |
| Butanedinitrile | -6.58 | -3.57 | -3.01 |
| 2,4-Pentanediol | -6.97 | -3.99 | -2.98 |
| trifluralin | -2.25 | -5.22 | 2.97 |
| Quinizarin | -5.49 | -8.44 | 2.95 |
| ethalfluralin | -2.28 | -5.22 | 2.94 |
| Metaldehyde | -2.68 | -5.58 | 2.90 |
| isopropalin | -2.83 | -5.72 | 2.89 |
| Cymoxanil | -7.47 | -10.33 | 2.86 |
| Quizalofop-P-ethyl | -7.08 | -9.91 | 2.83 |
| Isoxaben | -6.85 | -4.09 | -2.76 |
| prodiamine | -3.50 | -6.26 | 2.76 |
| Butoxycarboxim | -9.67 | -12.41 | 2.74 |
| Diisodecylphthalate | -2.14 | -4.87 | 2.73 |
| 1,4-Dicyanobutane | -6.30 | -3.60 | -2.70 |
| Chlorpromazine | -8.21 | -5.52 | -2.69 |
| Glyoxal | -6.87 | -4.18 | -2.69 |
| fenclorim | -3.14 | -5.81 | 2.67 |
| 2-hydroxypropyl laurate | -2.37 | -5.03 | 2.66 |
| Musk xylene | -2.90 | -5.55 | 2.65 |
| Acariflor | -6.05 | -8.70 | 2.65 |
| Bensulfuron-methyl | -12.04 | -14.65 | 2.61 |
| Bromuconazole | -8.20 | -5.63 | -2.57 |
| Azoxystrobin | -11.01 | -8.51 | -2.50 |
| Iprodione | -8.00 | -10.50 | 2.50 |
| Halauxifene | -8.94 | -11.44 | 2.50 |
| TCEP | -3.87 | -6.36 | 2.49 |
| 4-CPA | -8.41 | -5.93 | -2.48 |
| phosmet | -5.87 | -8.34 | 2.47 |
| Benzylaminopurine | -11.15 | -8.69 | -2.46 |
| Ethychlozate | -7.60 | -5.15 | -2.45 |
| Fenoxanil | -10.09 | -7.65 | -2.44 |
| Desmetryn | -7.38 | -9.81 | 2.43 |
| Dichlorophen | -10.33 | -7.92 | -2.41 |
| Diclofop | -9.36 | -6.95 | -2.41 |
| Picric acid | -8.87 | -6.46 | -2.41 |
| Diphacinone | -8.20 | -10.59 | 2.39 |
| Bis(2-ethylhexyl)terephthalate | -2.67 | -5.04 | 2.37 |
| Ethirimol | -6.86 | -9.20 | 2.34 |
| Tolprocarb | -8.21 | -10.53 | 2.32 |
| Diclobutrazol | -7.38 | -5.10 | -2.28 |
| decachlorodiphenylether | -0.75 | -3.01 | 2.26 |
| Benazolin | -10.02 | -7.77 | -2.25 |
| Dithianon | -9.07 | -11.30 | 2.23 |
| tebupirimfos | -3.73 | -5.96 | 2.23 |
| Tralopyril | -7.05 | -4.83 | -2.22 |
| Benzo-1,2,3-triazole | -4.72 | -2.51 | -2.21 |
| N-nitroso-N-methylurethane | -3.30 | -1.09 | -2.21 |
| 4-Nitrophenol | -7.58 | -5.38 | -2.20 |
| fenpyroximate | -4.26 | -6.46 | 2.20 |
| Metazachlor | -7.25 | -5.07 | -2.18 |
| Malonic acid | -10.16 | -7.99 | -2.17 |
| Hydroquinone | -8.72 | -6.57 | -2.15 |
| Phenacetin | -8.13 | -6.00 | -2.13 |
| emylcamate | -2.86 | -4.99 | 2.13 |
| propylene carbonate | -5.54 | -3.41 | -2.13 |
| cymiazole | -5.57 | -3.45 | -2.12 |
| Propylenecarbonate | -5.54 | -3.42 | -2.12 |
| 1,1,1-trifluoroacetone | -3.50 | -1.39 | -2.11 |
| Tribenuron-methyl | -9.89 | -11.99 | 2.10 |
| Diphenamid | -8.81 | -6.71 | -2.10 |
| fluoroacetic acid | -6.30 | -4.21 | -2.09 |
| Acetylsalicylic acid | -7.28 | -5.20 | -2.08 |
| Haloxyfop-etotyl | -7.97 | -5.90 | -2.07 |
| 8-Hydroxyquinoline | -4.70 | -6.75 | 2.05 |
| Coumatetralyl | -10.19 | -8.14 | -2.05 |
| Tetrachlorocatechol | -4.85 | -6.87 | 2.02 |
| Fenpropathrin | -3.50 | -5.51 | 2.01 |
