# Supplementary material for: Calculation of the Three Partition Coefficients logPow, logKoa and logKaw of Organic Molecules at Standard Conditions at Once by Means of a Generally Applicable Group-Additivity Method
Source: Preprints.org preprint supplement (doi:10.20944/preprints202312.0275.v1), 2023-12-05
Supplement: Supplementary file 8 [file Table 1.doc]

| **Atom type** | **Neighbours** | **Meaning** |
| --- | --- | --- |
| H | H Acceptor | Correction value for intramolecular H bridge between acidic H (on O, N or S) and basic acceptor (O, N or F) |
| (COH)n | n>1 | Correction value for each additional hydroxy group |
| (COOH)n | n>1 | Correction value for each additional carboxylic acid group |
| Alkane | No of C atoms | Correction value for each C atom in a pure alkane |
| Unsaturated HC | No of C atoms | Correction value for each C atom in an aromatic hydrocarbon |
| Endocyclic bonds | No of single bonds | Correction value for each single endocyclic bond |
