# Supplementary material for: Calculation of the Three Partition Coefficients logPow, logKoa and logKaw of Organic Molecules at Standard Conditions at Once by Means of a Generally Applicable Group-Additivity Method
Source: Preprints.org preprint supplement (doi:10.20944/preprints202312.0275.v1), 2023-12-05
Supplement: Supplementary file 9 [file Table 2.doc]

| **Entry** | **Atom Type** | **Neighbours** | **Contribution** | **Occurrences** | **Molecules** |
| --- | --- | --- | --- | --- | --- |
| 1 | Const |  | 0.73 | 3332 | 3332 |
| 2 | B(-) | F4 | 2.71 | 10 | 10 |
| 3 | C sp3 | H3C | 0.27 | 2614 | 1498 |
| 4 | C sp3 | H3N | 0.14 | 457 | 320 |
| 5 | C sp3 | H3N(+) | -1.35 | 2 | 2 |
| 6 | C sp3 | H3O | -0.26 | 375 | 285 |
| 7 | C sp3 | H3P | -0.3 | 4 | 4 |
| 8 | C sp3 | H3S | -0.34 | 61 | 53 |
| 9 | C sp3 | H3Si | 0.76 | 44 | 5 |
| 10 | C sp3 | H2C2 | 0.44 | 3262 | 1046 |
| 11 | C sp3 | H2CN | 0.42 | 741 | 429 |
| 12 | C sp3 | H2CN(+) | -0.86 | 32 | 25 |
| 13 | C sp3 | H2CO | -0.1 | 799 | 604 |
| 14 | C sp3 | H2CS | -0.33 | 97 | 69 |
| 15 | C sp3 | H2CF | -0.29 | 5 | 5 |
| 16 | C sp3 | H2CCl | 0.33 | 84 | 67 |
| 17 | C sp3 | H2CBr | 0.41 | 54 | 48 |
| 18 | C sp3 | H2CJ | 1.08 | 6 | 6 |
| 19 | C sp3 | H2CP | 2.77 | 1 | 1 |
| 20 | C sp3 | H2N2 | 2.05 | 3 | 3 |
| 21 | C sp3 | H2NO | 0.46 | 4 | 4 |
| 22 | C sp3 | H2NS | 0.72 | 3 | 3 |
| 23 | C sp3 | H2O2 | -0.17 | 6 | 6 |
| 24 | C sp3 | H2S2 | -0.86 | 6 | 6 |
| 25 | C sp3 | HC3 | 0.45 | 417 | 269 |
| 26 | C sp3 | HC2N | 0.58 | 200 | 157 |
| 27 | C sp3 | HC2N(+) | -0.73 | 25 | 24 |
| 28 | C sp3 | HC2O | 0.1 | 383 | 241 |
| 29 | C sp3 | HC2S | -0.21 | 8 | 8 |
| 30 | C sp3 | HC2F | -0.36 | 2 | 2 |
| 31 | C sp3 | HC2Cl | 0.69 | 64 | 22 |
| 32 | C sp3 | HC2Br | 0.81 | 26 | 22 |
| 33 | C sp3 | HCN2 | 1.2 | 6 | 5 |
| 34 | C sp3 | HCNO | 1.15 | 17 | 17 |
| 35 | C sp3 | HCNS | 0.9 | 25 | 25 |
| 36 | C sp3 | HCO2 | -0.02 | 31 | 22 |
| 37 | C sp3 | HCOS | 0.6 | 3 | 3 |
| 38 | C sp3 | HCOCl | 0.19 | 3 | 1 |
| 39 | C sp3 | HCOBr | 1.03 | 1 | 1 |
| 40 | C sp3 | HCOP | 0.31 | 1 | 1 |
| 41 | C sp3 | HCF2 | -0.02 | 2 | 2 |
| 42 | C sp3 | HCCl2 | 0.93 | 13 | 12 |
| 43 | C sp3 | HOF2 | -0.04 | 1 | 1 |
| 44 | C sp3 | C4 | 0.54 | 144 | 111 |
| 45 | C sp3 | C3N | 0.71 | 37 | 36 |
| 46 | C sp3 | C3N(+) | -0.43 | 6 | 6 |
| 47 | C sp3 | C3O | 0.04 | 54 | 52 |
| 48 | C sp3 | C3S | -0.1 | 17 | 17 |
| 49 | C sp3 | C3F | 0.94 | 4 | 4 |
| 50 | C sp3 | C3Cl | 0.8 | 21 | 8 |
| 51 | C sp3 | C3Br | 0.59 | 5 | 4 |
| 52 | C sp3 | C2N2 | -1.17 | 1 | 1 |
| 53 | C sp3 | C2NO | 0.52 | 5 | 5 |
| 54 | C sp3 | C2O2 | 1.65 | 5 | 5 |
| 55 | C sp3 | C2F2 | 0.67 | 2 | 2 |
| 56 | C sp3 | C2Cl2 | 0.84 | 9 | 9 |
| 57 | C sp3 | CNO2 | 1.46 | 1 | 1 |
| 58 | C sp3 | CF3 | 0.86 | 80 | 76 |
| 59 | C sp3 | CF2Cl | 1.1 | 3 | 2 |
| 60 | C sp3 | CFCl2 | 1.1 | 3 | 2 |
| 61 | C sp3 | CCl3 | 1.6 | 23 | 21 |
| 62 | C sp3 | CCl2Br | 0 | 1 | 1 |
| 63 | C sp3 | CBr3 | 2.44 | 1 | 1 |
| 64 | C sp3 | OF3 | 0.8 | 2 | 2 |
| 65 | C sp3 | SF3 | 1.04 | 8 | 8 |
| 66 | C sp3 | SFCl2 | 1.9 | 1 | 1 |
| 67 | C sp3 | SCl3 | 0.76 | 3 | 3 |
| 68 | C sp2 | H2=C | 0.25 | 97 | 87 |
| 69 | C sp2 | H2=N | -0.62 | 1 | 1 |
| 70 | C sp2 | HC=C | 0.24 | 449 | 285 |
| 71 | C sp2 | HC=N | -1.98 | 18 | 18 |
| 72 | C sp2 | HC=N(+) | 0.94 | 10 | 10 |
| 73 | C sp2 | H=CN | -0.08 | 146 | 109 |
| 74 | C sp2 | H=CN(+) | -0.6 | 18 | 18 |
| 75 | C sp2 | HC=O | -0.73 | 45 | 45 |
| 76 | C sp2 | H=CO | 0.32 | 14 | 13 |
| 77 | C sp2 | H=CS | 0.02 | 17 | 16 |
| 78 | C sp2 | H=CCl | 0.51 | 8 | 6 |
| 79 | C sp2 | H=CBr | 0.59 | 1 | 1 |
| 80 | C sp2 | HN=N | -0.06 | 65 | 52 |
| 81 | C sp2 | HN=O | -0.63 | 16 | 15 |
| 82 | C sp2 | HO=O | -0.4 | 10 | 10 |
| 83 | C sp2 | H=NS | -0.51 | 4 | 4 |
| 84 | C sp2 | C2=C | 0.38 | 160 | 133 |
| 85 | C sp2 | C2=N | -0.25 | 105 | 102 |
| 86 | C sp2 | C2=N(+) | 2.45 | 1 | 1 |
| 87 | C sp2 | C2=O | -0.86 | 242 | 194 |
| 88 | C sp2 | C=CN | 0.76 | 76 | 64 |
| 89 | C sp2 | C=CN(+) | -0.56 | 3 | 3 |
| 90 | C sp2 | C=CO | 0.64 | 41 | 36 |
| 91 | C sp2 | C=CS | -0.16 | 17 | 15 |
| 92 | C sp2 | C=CF | -0.01 | 3 | 3 |
| 93 | C sp2 | C=CCl | 0.81 | 31 | 21 |
| 94 | C sp2 | C=CBr | 0.94 | 4 | 4 |
| 95 | C sp2 | C=CJ | 0.89 | 1 | 1 |
| 96 | C sp2 | C=CP | 0 | 1 | 1 |
| 97 | C sp2 | =CN2 | 1.36 | 19 | 19 |
| 98 | C sp2 | =CN2(+) | 0.74 | 11 | 11 |
| 99 | C sp2 | CN=N | 0.24 | 67 | 63 |
| 100 | C sp2 | CN=N(+) | -0.67 | 1 | 1 |
| 101 | C sp2 | CN=O | -0.69 | 449 | 364 |
| 102 | C sp2 | C=NO | -0.76 | 1 | 1 |
| 103 | C sp2 | =CNO | -0.01 | 4 | 4 |
| 104 | C sp2 | =CNO(+) | -0.37 | 2 | 2 |
| 105 | C sp2 | CN=S | -0.36 | 8 | 8 |
| 106 | C sp2 | C=NS | 0.07 | 5 | 4 |
| 107 | C sp2 | =CNS | 0.37 | 4 | 4 |
| 108 | C sp2 | =CNCl | 1.94 | 1 | 1 |
| 109 | C sp2 | =CNBr | 0.7 | 5 | 3 |
| 110 | C sp2 | C=NCl | 1.75 | 1 | 1 |
| 111 | C sp2 | CO=O | -0.13 | 700 | 613 |
| 112 | C sp2 | CO=O(-) | -2.16 | 35 | 35 |
| 113 | C sp2 | C=OS | -0.99 | 4 | 4 |
| 114 | C sp2 | C=OCl | 0.28 | 4 | 4 |
| 115 | C sp2 | =COCl | 1.27 | 1 | 1 |
| 116 | C sp2 | =CS2 | 0 | 3 | 3 |
| 117 | C sp2 | =CSBr | -2.41 | 1 | 1 |
| 118 | C sp2 | =CF2 | 0.26 | 1 | 1 |
| 119 | C sp2 | =CCl2 | 1.21 | 12 | 10 |
| 120 | C sp2 | =CBr2 | 1.36 | 1 | 1 |
| 121 | C sp2 | N2=N | 0.79 | 26 | 25 |
| 122 | C sp2 | N2=N(+) | 0.74 | 1 | 1 |
| 123 | C sp2 | N2=O | 0.07 | 135 | 134 |
| 124 | C sp2 | N=NO | 0.11 | 1 | 1 |
| 125 | C sp2 | N2=S | 0.11 | 9 | 8 |
| 126 | C sp2 | N=NS | 0.24 | 25 | 24 |
| 127 | C sp2 | N=NCl | 1.13 | 3 | 3 |
| 128 | C sp2 | N=NBr | 0.24 | 3 | 2 |
| 129 | C sp2 | NO=O | 0.2 | 117 | 114 |
| 130 | C sp2 | =NOS | -0.19 | 1 | 1 |
| 131 | C sp2 | N=OS | 0.05 | 7 | 7 |
| 132 | C sp2 | NO=S | 0.97 | 1 | 1 |
| 133 | C sp2 | =NS2 | -1.65 | 2 | 2 |
| 134 | C sp2 | NS=S | -1.02 | 5 | 3 |
| 135 | C sp2 | =NSCl | 1.17 | 1 | 1 |
| 136 | C sp2 | O2=O | 0 | 3 | 3 |
| 137 | C sp2 | O=OCl | -0.13 | 3 | 3 |
| 138 | C aromatic | H:C2 | 0.25 | 9963 | 2133 |
| 139 | C aromatic | H:C:N | -0.49 | 283 | 193 |
| 140 | C aromatic | H:C:N(+) | 0.22 | 33 | 27 |
| 141 | C aromatic | H:N2 | -0.91 | 9 | 9 |
| 142 | C aromatic | :C3 | 0.25 | 389 | 170 |
| 143 | C aromatic | C:C2 | 0.32 | 2023 | 1351 |
| 144 | C aromatic | C:C:N | -0.38 | 74 | 62 |
| 145 | C aromatic | C:C:N(+) | -3.29 | 4 | 3 |
| 146 | C aromatic | :C2N | 0.39 | 653 | 534 |
| 147 | C aromatic | :C2N(+) | -0.15 | 194 | 161 |
| 148 | C aromatic | :C2:N | -0.09 | 93 | 72 |
| 149 | C aromatic | :C2:N(+) | -3.54 | 19 | 19 |
| 150 | C aromatic | :C2O | 0.57 | 1076 | 742 |
| 151 | C aromatic | :C2S | 0.08 | 208 | 170 |
| 152 | C aromatic | :C2F | 0.27 | 126 | 86 |
| 153 | C aromatic | :C2Cl | 0.78 | 1718 | 565 |
| 154 | C aromatic | :C2Br | 0.9 | 248 | 111 |
| 155 | C aromatic | :C2J | 1.26 | 50 | 34 |
| 156 | C aromatic | :C2P | 1.08 | 1 | 1 |
| 157 | C aromatic | C:N2 | -1.81 | 9 | 9 |
| 158 | C aromatic | :C:N2 | -0.13 | 1 | 1 |
| 159 | C aromatic | :CN:N | 0.49 | 38 | 34 |
| 160 | C aromatic | :CN:N(+) | -0.83 | 1 | 1 |
| 161 | C aromatic | :C:NO | 0.97 | 21 | 15 |
| 162 | C aromatic | :C:NS | -0.16 | 5 | 5 |
| 163 | C aromatic | :C:NF | -0.23 | 4 | 3 |
| 164 | C aromatic | :C:NCl | 0.16 | 18 | 16 |
| 165 | C aromatic | :C:NBr | 0.06 | 1 | 1 |
| 166 | C aromatic | N:N2 | -0.05 | 51 | 41 |
| 167 | C aromatic | N:N2(+) | 0 | 1 | 1 |
| 168 | C aromatic | :N2O | 1.53 | 8 | 8 |
| 169 | C aromatic | :N2S | 0.8 | 3 | 3 |
| 170 | C aromatic | :N2Cl | 0.89 | 6 | 6 |
| 171 | C(+) aromatic | H:N2 | 0.21 | 25 | 25 |
| 172 | C sp | H#C | -0.27 | 28 | 28 |
| 173 | C sp | C#C | 0.2 | 86 | 57 |
| 174 | C sp | C#N | -0.7 | 136 | 130 |
| 175 | C sp | N#N | 0.04 | 3 | 3 |
| 176 | C sp | #NS | -0.59 | 5 | 5 |
| 177 | C sp | =N=O | 0.64 | 4 | 4 |
| 178 | C sp | =N=S | 1.53 | 27 | 26 |
| 179 | N sp3 | H2C | -1.57 | 86 | 84 |
| 180 | N sp3 | H2C(pi) | -1.05 | 326 | 292 |
| 181 | N sp3 | H2N | -0.85 | 20 | 20 |
| 182 | N sp3 | H2S | -1.55 | 34 | 34 |
| 183 | N sp3 | HC2 | -1.3 | 74 | 73 |
| 184 | N sp3 | HC2(pi) | -0.93 | 225 | 203 |
| 185 | N sp3 | HC2(2pi) | -0.47 | 311 | 272 |
| 186 | N sp3 | HCN | -1.1 | 4 | 3 |
| 187 | N sp3 | HCN(pi) | -0.49 | 14 | 13 |
| 188 | N sp3 | HCN(2pi) | 1.65 | 42 | 42 |
| 189 | N sp3 | HCO(pi) | -1.32 | 9 | 9 |
| 190 | N sp3 | HCS | -1.69 | 4 | 4 |
| 191 | N sp3 | HCS(pi) | -0.98 | 47 | 47 |
| 192 | N sp3 | HCP | -1.78 | 3 | 3 |
| 193 | N sp3 | HCP(pi) | -0.41 | 1 | 1 |
| 194 | N sp3 | C3 | -1.03 | 122 | 108 |
| 195 | N sp3 | C3(pi) | -0.73 | 153 | 138 |
| 196 | N sp3 | C3(2pi) | -0.72 | 149 | 136 |
| 197 | N sp3 | C3(3pi) | -0.75 | 23 | 23 |
| 198 | N sp3 | C2N | -1.57 | 1 | 1 |
| 199 | N sp3 | C2N(pi) | -1.41 | 31 | 28 |
| 200 | N sp3 | C2N(2pi) | -0.67 | 51 | 47 |
| 201 | N sp3 | C2N(3pi) | -0.44 | 10 | 10 |
| 202 | N sp3 | C2O(pi) | -0.31 | 5 | 5 |
| 203 | N sp3 | C2S | -1.42 | 5 | 5 |
| 204 | N sp3 | C2S(pi) | 0.03 | 7 | 6 |
| 205 | N sp3 | C2S(2pi) | 0.76 | 2 | 2 |
| 206 | N sp3 | C2P | -0.33 | 5 | 3 |
| 207 | N sp3 | CN2(2pi) | 1.36 | 1 | 1 |
| 208 | N sp3 | CS2 | 0.27 | 1 | 1 |
| 209 | N sp3 | CS2(pi) | -0.29 | 1 | 1 |
| 210 | N sp2 | H=C | -0.67 | 12 | 11 |
| 211 | N sp2 | C=C | -0.72 | 200 | 180 |
| 212 | N sp2 | C=N | 0.01 | 13 | 12 |
| 213 | N sp2 | =CN | 0.49 | 96 | 78 |
| 214 | N sp2 | C=N(+) | -6.61 | 1 | 1 |
| 215 | N sp2 | =CN(+) | -1.02 | 2 | 2 |
| 216 | N sp2 | =CO | -0.64 | 47 | 41 |
| 217 | N sp2 | C=O | -1.05 | 2 | 2 |
| 218 | N sp2 | =CS | -1.44 | 5 | 4 |
| 219 | N sp2 | N=N | -0.78 | 25 | 18 |
| 220 | N sp2 | N=O | 0.16 | 40 | 37 |
| 221 | N aromatic | C2:C(+) | 0 | 50 | 25 |
| 222 | N aromatic | :C2 | 0.38 | 354 | 258 |
| 223 | N aromatic | :C:N | -0.35 | 4 | 2 |
| 224 | N(+) sp3 | H3C | -1.03 | 26 | 26 |
| 225 | N(+) sp3 | H2C2 | 1.2 | 5 | 5 |
| 226 | N(+) sp3 | HC3 | 2.68 | 1 | 1 |
| 227 | N(+) sp3 | C4 | 3.03 | 1 | 1 |
| 228 | N(+) sp2 | C=CO(-) | -2.3 | 10 | 10 |
| 229 | N(+) sp2 | CO=O(-) | 0.27 | 235 | 198 |
| 230 | N(+) sp2 | NO=O(-) | -0.19 | 2 | 2 |
| 231 | N(+) sp2 | O2=O(-) | 0.44 | 55 | 29 |
| 232 | N(+) aromatic | H:C2 | 2.5 | 3 | 3 |
| 233 | N(+) aromatic | C:C2 | -0.48 | 7 | 6 |
| 234 | N(+) aromatic | :C2O(-) | 1.73 | 19 | 19 |
| 235 | N(+) sp | =C=N(-) | 1.8 | 1 | 1 |
| 236 | N(+) sp | =N2(-) | 0 | 1 | 1 |
| 237 | O | HC | -0.96 | 481 | 344 |
| 238 | O | HC(pi) | -0.72 | 627 | 557 |
| 239 | O | HN | -0.15 | 11 | 11 |
| 240 | O | HN(pi) | -0.24 | 6 | 6 |
| 241 | O | C2 | 0.06 | 156 | 115 |
| 242 | O | C2(pi) | -0.13 | 726 | 588 |
| 243 | O | C2(2pi) | -0.51 | 301 | 280 |
| 244 | O | CN | 0.4 | 3 | 3 |
| 245 | O | CN(pi) | 0.82 | 4 | 4 |
| 246 | O | CN(+)(pi) | 0.01 | 55 | 29 |
| 247 | O | CN(2pi) | 0.53 | 13 | 12 |
| 248 | O | CS | -0.13 | 13 | 8 |
| 249 | O | CS(pi) | -0.1 | 3 | 3 |
| 250 | O | CP | 0.23 | 132 | 68 |
| 251 | O | CP(pi) | -0.49 | 36 | 26 |
| 252 | O | CSi | -0.15 | 8 | 2 |
| 253 | O | N2(2pi) | 1.91 | 5 | 5 |
| 254 | O | NP(pi) | -1.95 | 14 | 14 |
| 255 | O | Si2 | 0.09 | 18 | 4 |
| 256 | S2 | HC | 0.65 | 14 | 12 |
| 257 | S2 | HC(pi) | 0.14 | 31 | 31 |
| 258 | S2 | C2 | 1.39 | 48 | 45 |
| 259 | S2 | C2(pi) | 0.98 | 68 | 63 |
| 260 | S2 | C2(2pi) | 0.98 | 55 | 54 |
| 261 | S2 | CN | 0 | 3 | 3 |
| 262 | S2 | CN(2pi) | 2.3 | 1 | 1 |
| 263 | S2 | CS | 0.87 | 2 | 1 |
| 264 | S2 | CS(pi) | 1.97 | 4 | 2 |
| 265 | S2 | CP | 1.12 | 17 | 15 |
| 266 | S2 | CP(pi) | 0.48 | 3 | 2 |
| 267 | S2 | N2 | -2.2 | 2 | 2 |
| 268 | S2 | N2(2pi) | 5.96 | 1 | 1 |
| 269 | S4 | C2=O | -1.13 | 11 | 11 |
| 270 | S4 | C2=O2 | -0.5 | 16 | 16 |
| 271 | S4 | CO=O2 | -0.48 | 2 | 1 |
| 272 | S4 | CN=O2 | -0.05 | 85 | 80 |
| 273 | S4 | C=O2F | 0.24 | 2 | 2 |
| 274 | S4 | NO=O2 | 0 | 3 | 3 |
| 275 | S4 | N2=O2 | 0.77 | 5 | 5 |
| 276 | S4 | O2=O | 0.83 | 2 | 2 |
| 277 | S4 | O2=O2 | 0.5 | 2 | 2 |
| 278 | S4 | O2=O2(-) | -1.14 | 3 | 3 |
| 279 | P4 | CO2=O | -1.11 | 2 | 2 |
| 280 | P4 | CO2=S | 0.26 | 1 | 1 |
| 281 | P4 | CO=OS | -2.58 | 1 | 1 |
| 282 | P4 | CO=OF | -0.88 | 3 | 3 |
| 283 | P4 | COS=S | -2.04 | 1 | 1 |
| 284 | P4 | O3=O | -0.56 | 29 | 29 |
| 285 | P4 | O3=S | 1.12 | 18 | 18 |
| 286 | P4 | O2S=S | 0.7 | 12 | 11 |
| 287 | P4 | O=OS2 | -0.54 | 2 | 2 |
| 288 | P4 | N3=O | -0.31 | 1 | 1 |
| 289 | P4 | N2O=O | 0.24 | 2 | 2 |
| 290 | P4 | NO=OS | -1.5 | 2 | 2 |
| 291 | Si | C4 | -0.51 | 1 | 1 |
| 292 | Si | C3O | -1.7 | 2 | 1 |
| 293 | Si | C2O2 | 0.13 | 17 | 4 |
| 294 | Si | O4 | 0 | 2 | 2 |
| 295 | Halide |  | 1.1 | 20 | 19 |
| 296 | H | H Acceptor | 0.51 | 164 | 154 |
| 297 | (COH)n | n>1 | 0.26 | 137 | 74 |
| 298 | (COOH)n | n>1 | -0.15 | 26 | 25 |
| 299 | Alkane | No of C atoms | 0.09 | 290 | 32 |
| 300 | Unsaturated HC | No of C atoms | 0.02 | 1584 | 135 |
| 301 | Endocyclic bonds | No of single bds | -0.14 | 2338 | 384 |
| A | Based on | Valid groups | 214 |  | 3332 |
| B | Goodness of fit | R2 | 0.9648 |  | 3246 |
| C | Deviation | Average | 0.31 |  | 3246 |
| D | Deviation | Standard | 0.39 |  | 3246 |
| E | K-fold cv | K | 10 |  | 3164 |
| F | Goodness of fit | Q2 | 0.9599 |  | 3164 |
| G | Deviation | Average (cv) | 0.33 |  | 3164 |
| H | Deviation | Standard (cv) | 0.42 |  | 3164 |
