# Supplementary material for: Calculation of the Three Partition Coefficients logPow, logKoa and logKaw of Organic Molecules at Standard Conditions at Once by Means of a Generally Applicable Group-Additivity Method
Source: Preprints.org preprint supplement (doi:10.20944/preprints202312.0275.v1), 2023-12-05
Supplement: Supplementary file 10 [file Table 3.doc]

| **Entry** | **Atom Type** | **Neighbours** | **Contribution** | **Occurrences** | **Molecules** |
| --- | --- | --- | --- | --- | --- |
| 1 | Const |  | 1.46 | 1900 | 1900 |
| 2 | C sp3 | H3C | -0.07 | 1800 | 875 |
| 3 | C sp3 | H3N | 3.42 | 131 | 87 |
| 4 | C sp3 | H3N(+) | 1.42 | 1 | 1 |
| 5 | C sp3 | H3O | 2.24 | 292 | 219 |
| 6 | C sp3 | H3S | 1.51 | 30 | 26 |
| 7 | C sp3 | H3P | -0.42 | 3 | 3 |
| 8 | C sp3 | H3Si | 0.42 | 68 | 11 |
| 9 | C sp3 | H2C2 | 0.43 | 1732 | 538 |
| 10 | C sp3 | H2CN | 3.91 | 191 | 129 |
| 11 | C sp3 | H2CN(+) | 1.64 | 6 | 5 |
| 12 | C sp3 | H2CO | 2.61 | 535 | 342 |
| 13 | C sp3 | H2CS | 1.76 | 57 | 44 |
| 14 | C sp3 | H2CP | 2.58 | 3 | 3 |
| 15 | C sp3 | H2CF | -0.77 | 3 | 3 |
| 16 | C sp3 | H2CCl | 0.71 | 75 | 56 |
| 17 | C sp3 | H2CBr | 1.05 | 23 | 18 |
| 18 | C sp3 | H2CJ | 1.13 | 5 | 5 |
| 19 | C sp3 | H2CSi | 2.91 | 4 | 4 |
| 20 | C sp3 | H2N2 | 4.89 | 8 | 3 |
| 21 | C sp3 | H2NO | 5.65 | 9 | 8 |
| 22 | C sp3 | H2NS | 4.67 | 5 | 5 |
| 23 | C sp3 | H2O2 | 4.78 | 6 | 4 |
| 24 | C sp3 | H2S2 | 3.74 | 4 | 4 |
| 25 | C sp3 | HC3 | 0.64 | 268 | 180 |
| 26 | C sp3 | HC2N | 4.08 | 64 | 53 |
| 27 | C sp3 | HC2N(+) | 2.05 | 1 | 1 |
| 28 | C sp3 | HC2O | 2.86 | 169 | 135 |
| 29 | C sp3 | HC2S | 1.76 | 9 | 7 |
| 30 | C sp3 | HC2F | -1.66 | 1 | 1 |
| 31 | C sp3 | HC2Cl | 1.21 | 43 | 17 |
| 32 | C sp3 | HC2Br | 1.31 | 14 | 9 |
| 33 | C sp3 | HC2J | 1.95 | 1 | 1 |
| 34 | C sp3 | HCNO | 8.18 | 3 | 3 |
| 35 | C sp3 | HCNS | 2.08 | 1 | 1 |
| 36 | C sp3 | HCO2 | 5.73 | 6 | 6 |
| 37 | C sp3 | HCF2 | -0.18 | 7 | 7 |
| 38 | C sp3 | HCFCl | 0.02 | 2 | 2 |
| 39 | C sp3 | HCCl2 | 1.18 | 15 | 14 |
| 40 | C sp3 | HCClBr | 0.77 | 1 | 1 |
| 41 | C sp3 | HOF2 | 1.79 | 3 | 3 |
| 42 | C sp3 | C4 | 0.73 | 98 | 84 |
| 43 | C sp3 | C3N | 4.1 | 13 | 13 |
| 44 | C sp3 | C3O | 3.11 | 40 | 37 |
| 45 | C sp3 | C3S | 2.6 | 3 | 3 |
| 46 | C sp3 | C3Cl | 0.87 | 37 | 15 |
| 47 | C sp3 | C2NO | 5.94 | 1 | 1 |
| 48 | C sp3 | C2O2 | 5.94 | 6 | 6 |
| 49 | C sp3 | C2F2 | 0.23 | 58 | 10 |
| 50 | C sp3 | C2Cl2 | 1.24 | 18 | 17 |
| 51 | C sp3 | CNO2 | 9.56 | 1 | 1 |
| 52 | C sp3 | COF2 | 3.06 | 3 | 3 |
| 53 | C sp3 | CF3 | -0.06 | 55 | 51 |
| 54 | C sp3 | CF2Cl | -0.02 | 4 | 3 |
| 55 | C sp3 | CFCl2 | 0.37 | 3 | 2 |
| 56 | C sp3 | CCl3 | 1.62 | 17 | 16 |
| 57 | C sp3 | CBr3 | 0.57 | 1 | 1 |
| 58 | C sp3 | O2F2 | 6.85 | 1 | 1 |
| 59 | C sp3 | OF3 | 1.86 | 3 | 3 |
| 60 | C sp2 | H2=C | -0.19 | 88 | 76 |
| 61 | C sp2 | HC=C | 0.34 | 233 | 141 |
| 62 | C sp2 | HC=N | 0.85 | 8 | 8 |
| 63 | C sp2 | HC=O | 1 | 27 | 27 |
| 64 | C sp2 | H=CN | 1.1 | 19 | 13 |
| 65 | C sp2 | H=CO | 0.48 | 15 | 14 |
| 66 | C sp2 | H=CS | -1.08 | 9 | 7 |
| 67 | C sp2 | H=CCl | 0.44 | 12 | 10 |
| 68 | C sp2 | H=CBr | 0.6 | 3 | 2 |
| 69 | C sp2 | H=CSi | 2.17 | 1 | 1 |
| 70 | C sp2 | HN=N | 1.73 | 53 | 30 |
| 71 | C sp2 | HN=O | 2.27 | 3 | 3 |
| 72 | C sp2 | HO=O | 0.92 | 4 | 4 |
| 73 | C sp2 | H=NS | 2.88 | 1 | 1 |
| 74 | C sp2 | C2=C | 0.8 | 103 | 79 |
| 75 | C sp2 | C2=N | 1.62 | 34 | 30 |
| 76 | C sp2 | C=CN | 1.6 | 19 | 16 |
| 77 | C sp2 | C2=O | 1.08 | 87 | 75 |
| 78 | C sp2 | C=CO | 1.22 | 27 | 26 |
| 79 | C sp2 | C=CP | -0.09 | 1 | 1 |
| 80 | C sp2 | C=CS | -0.41 | 14 | 10 |
| 81 | C sp2 | C=CCl | 0.62 | 39 | 24 |
| 82 | C sp2 | C=CBr | 1.01 | 12 | 5 |
| 83 | C sp2 | =CN2 | 2.98 | 2 | 2 |
| 84 | C sp2 | CN=N | 2.75 | 7 | 7 |
| 85 | C sp2 | CN=O | 2.64 | 93 | 88 |
| 86 | C sp2 | C=NO | 1.26 | 5 | 5 |
| 87 | C sp2 | =CNO | -1.24 | 3 | 3 |
| 88 | C sp2 | C=NS | 0.46 | 6 | 6 |
| 89 | C sp2 | =CNCl | 3.35 | 6 | 3 |
| 90 | C sp2 | CO=O | 1.73 | 244 | 210 |
| 91 | C sp2 | C=OS | -0.61 | 3 | 2 |
| 92 | C sp2 | =CS2 | -0.66 | 1 | 1 |
| 93 | C sp2 | =CF2 | -1.14 | 1 | 1 |
| 94 | C sp2 | =CCl2 | 1.14 | 16 | 14 |
| 95 | C sp2 | N2=N | 3.36 | 9 | 9 |
| 96 | C sp2 | N2=O | 3.65 | 43 | 40 |
| 97 | C sp2 | N=NO | 2.64 | 4 | 4 |
| 98 | C sp2 | N=NS | 0.71 | 7 | 7 |
| 99 | C sp2 | NO=O | 2.81 | 38 | 36 |
| 100 | C sp2 | N=OS | 0.93 | 17 | 17 |
| 101 | C sp2 | NO=S | 4.26 | 1 | 1 |
| 102 | C sp2 | =NOS | 0.68 | 3 | 3 |
| 103 | C sp2 | NS=S | 6.03 | 3 | 2 |
| 104 | C sp2 | =NSCl | -5.44 | 2 | 2 |
| 105 | C sp2 | O2=O | 2.56 | 3 | 3 |
| 106 | C aromatic | H:C2 | 0.31 | 5436 | 1136 |
| 107 | C aromatic | H:C:N | 0.53 | 81 | 49 |
| 108 | C aromatic | H:N2 | 0.17 | 6 | 6 |
| 109 | C aromatic | :C3 | 0.89 | 441 | 148 |
| 110 | C aromatic | C:C2 | 0.79 | 1163 | 657 |
| 111 | C aromatic | C:C:N | 0.68 | 42 | 30 |
| 112 | C aromatic | :C2N | 1.35 | 164 | 146 |
| 113 | C aromatic | :C2N(+) | 2.09 | 96 | 69 |
| 114 | C aromatic | :C2:N | 1.01 | 13 | 10 |
| 115 | C aromatic | :C2O | 1.27 | 769 | 453 |
| 116 | C aromatic | :C2P | 3.53 | 5 | 3 |
| 117 | C aromatic | :C2S | -0.19 | 38 | 33 |
| 118 | C aromatic | :C2Si | -0.25 | 1 | 1 |
| 119 | C aromatic | :C2F | 0.13 | 99 | 41 |
| 120 | C aromatic | :C2Cl | 0.91 | 1844 | 550 |
| 121 | C aromatic | :C2Br | 1.24 | 391 | 143 |
| 122 | C aromatic | :C2J | 2.14 | 10 | 9 |
| 123 | C aromatic | C:N2 | 0.77 | 11 | 10 |
| 124 | C aromatic | :CN:N | 0.8 | 4 | 4 |
| 125 | C aromatic | :C:NO | 1.2 | 28 | 24 |
| 126 | C aromatic | :C:NCl | 0.9 | 14 | 12 |
| 127 | C aromatic | N:N2 | 1.18 | 60 | 36 |
| 128 | C aromatic | :N2O | 1.15 | 11 | 11 |
| 129 | C aromatic | :N2S | -0.6 | 8 | 8 |
| 130 | C aromatic | :N2Cl | 0.43 | 9 | 8 |
| 131 | C sp | H#C | -0.45 | 18 | 17 |
| 132 | C sp | C#C | 0.67 | 18 | 17 |
| 133 | C sp | C#N | 0.73 | 46 | 43 |
| 134 | C sp | N#N | 5.32 | 1 | 1 |
| 135 | C sp | #NP | -5.58 | 1 | 1 |
| 136 | C sp | =N=S | -0.13 | 2 | 2 |
| 137 | N sp3 | H2C | -2.18 | 17 | 16 |
| 138 | N sp3 | H2C(pi) | 1.02 | 57 | 53 |
| 139 | N sp3 | H2N | 3.57 | 5 | 5 |
| 140 | N sp3 | H2S | 1.81 | 1 | 1 |
| 141 | N sp3 | HC2 | -5.94 | 12 | 11 |
| 142 | N sp3 | HC2(pi) | -2.38 | 93 | 70 |
| 143 | N sp3 | HC2(2pi) | 0.08 | 65 | 56 |
| 144 | N sp3 | HCN(pi) | 0.02 | 5 | 4 |
| 145 | N sp3 | HCN(2pi) | 1.2 | 4 | 4 |
| 146 | N sp3 | HCO(pi) | 1.13 | 1 | 1 |
| 147 | N sp3 | HCP | -4.1 | 3 | 3 |
| 148 | N sp3 | HCP(pi) | 1.51 | 1 | 1 |
| 149 | N sp3 | HCS(pi) | -1.54 | 8 | 8 |
| 150 | N sp3 | C3 | -9.44 | 17 | 17 |
| 151 | N sp3 | C3(pi) | -6.39 | 58 | 55 |
| 152 | N sp3 | C3(2pi) | -4.82 | 49 | 45 |
| 153 | N sp3 | C3(3pi) | -3.61 | 9 | 9 |
| 154 | N sp3 | C2N | -5.12 | 1 | 1 |
| 155 | N sp3 | C2N(pi) | -2.54 | 15 | 14 |
| 156 | N sp3 | C2N(+)(pi) | -1.93 | 7 | 2 |
| 157 | N sp3 | C2N(2pi) | -3.84 | 36 | 36 |
| 158 | N sp3 | C2N(3pi) | -0.65 | 13 | 12 |
| 159 | N sp3 | C2P | 0 | 1 | 1 |
| 160 | N sp3 | C2P(pi) | -2.97 | 1 | 1 |
| 161 | N sp3 | C2P(2pi) | -4.07 | 1 | 1 |
| 162 | N sp2 | H=C | 0.51 | 1 | 1 |
| 163 | N sp2 | C=C | -0.97 | 54 | 48 |
| 164 | N sp2 | C=N | 0.61 | 6 | 4 |
| 165 | N sp2 | =CN | 0.03 | 54 | 49 |
| 166 | N sp2 | =CN(+) | 9.74 | 2 | 2 |
| 167 | N sp2 | =CO | -3.65 | 30 | 26 |
| 168 | N sp2 | N=N | -1.3 | 4 | 3 |
| 169 | N sp2 | N=O | -2.02 | 13 | 13 |
| 170 | N aromatic | :C2 | 0.54 | 194 | 109 |
| 171 | N aromatic | :C:N | 0.47 | 4 | 1 |
| 172 | N(+) sp2 | CO=O(-) | -0.36 | 104 | 76 |
| 173 | N(+) sp2 | NO=O(-) | 0 | 9 | 4 |
| 174 | N(+) sp2 | O2=O(-) | -1.09 | 63 | 35 |
| 175 | O | HC | -0.66 | 143 | 121 |
| 176 | O | HC(pi) | 1.39 | 175 | 159 |
| 177 | O | HN(pi) | 4.18 | 2 | 2 |
| 178 | O | HP | 2.11 | 4 | 2 |
| 179 | O | HSi | 1.91 | 3 | 2 |
| 180 | O | C2 | -4.17 | 139 | 105 |
| 181 | O | C2(pi) | -2.68 | 392 | 317 |
| 182 | O | C2(2pi) | -0.92 | 255 | 228 |
| 183 | O | CN(pi) | 0.51 | 20 | 16 |
| 184 | O | CN(+)(pi) | 0.1 | 63 | 35 |
| 185 | O | CN(2pi) | 3.07 | 8 | 8 |
| 186 | O | CO(pi) | -1.03 | 2 | 1 |
| 187 | O | CS | -0.88 | 11 | 6 |
| 188 | O | CP | -1.2 | 183 | 93 |
| 189 | O | CP(pi) | -0.01 | 70 | 54 |
| 190 | O | CSi | -2.38 | 9 | 3 |
| 191 | O | NP(pi) | 4.65 | 1 | 1 |
| 192 | O | P2 | 1.7 | 1 | 1 |
| 193 | O | Si2 | 0 | 21 | 6 |
| 194 | P4 | C3=O | -5.7 | 1 | 1 |
| 195 | P4 | CNO=O | 1.2 | 1 | 1 |
| 196 | P4 | CO2=O | 1.47 | 3 | 3 |
| 197 | P4 | CO2=S | -1.5 | 3 | 3 |
| 198 | P4 | CO=OS | 1.99 | 1 | 1 |
| 199 | P4 | CO=OF | 1.94 | 1 | 1 |
| 200 | P4 | COS=S | -0.86 | 1 | 1 |
| 201 | P4 | NO2=O | 3.42 | 1 | 1 |
| 202 | P4 | NO2=S | 1.88 | 3 | 3 |
| 203 | P4 | NO=OS | 1.2 | 2 | 2 |
| 204 | P4 | O3=O | 0.09 | 29 | 29 |
| 205 | P4 | O3=S | -0.4 | 32 | 30 |
| 206 | P4 | O2=OS | 0.43 | 5 | 5 |
| 207 | P4 | O2=OF | -0.17 | 1 | 1 |
| 208 | P4 | O=OS2 | 1.58 | 3 | 3 |
| 209 | P4 | O2S=S | -0.27 | 18 | 17 |
| 210 | P4 | =OS3 | 1.46 | 1 | 1 |
| 211 | S2 | HC | -1.08 | 2 | 2 |
| 212 | S2 | HC(pi) | 1.54 | 1 | 1 |
| 213 | S2 | C2 | -1.5 | 14 | 14 |
| 214 | S2 | C2(pi) | 0.4 | 41 | 39 |
| 215 | S2 | C2(2pi) | 2.82 | 24 | 23 |
| 216 | S2 | CS | -0.58 | 4 | 2 |
| 217 | S2 | CS(pi) | -2.98 | 2 | 1 |
| 218 | S2 | CP | -0.12 | 33 | 28 |
| 219 | S2 | CP(pi) | 1.78 | 3 | 2 |
| 220 | S4 | C2=O | 0.6 | 2 | 2 |
| 221 | S4 | C2=O2 | 2.13 | 3 | 3 |
| 222 | S4 | CN=O2 | 3.26 | 9 | 9 |
| 223 | S4 | CO=O2 | -0.05 | 1 | 1 |
| 224 | S4 | O2=O | -0.35 | 2 | 2 |
| 225 | S4 | O2=O2 | 0.24 | 3 | 3 |
| 226 | S6 | CF5 | 1.92 | 3 | 3 |
| 227 | Si | C4 | -1.33 | 3 | 3 |
| 228 | Si | C3O | -0.65 | 7 | 4 |
| 229 | Si | C2O2 | 0.1 | 19 | 6 |
| 230 | Si | CO3 | 0 | 3 | 3 |
| 231 | H | H Acceptor | -1.51 | 47 | 45 |
| 232 | (COH)n | n>1 | 0.06 | 22 | 15 |
| 233 | (COOH)n | n>1 | 1.2 | 6 | 6 |
| 234 | Alkane | No of C atoms | -0.05 | 268 | 34 |
| 235 | Unsaturated HC | No of C atoms | -0.03 | 1512 | 140 |
| 236 | Endocyclic bonds | No of single bds | -0.11 | 1109 | 210 |
| A | Based on | Valid groups | 167 |  | 1900 |
| B | Goodness of fit | R2 | 0.9765 |  | 1829 |
| C | Deviation | Average | 0.34 |  | 1829 |
| D | Deviation | Standard | 0.44 |  | 1829 |
| E | K-fold cv | K | 10 |  | 1765 |
| F | Goodness of fit | Q2 | 0.9717 |  | 1765 |
| G | Deviation | Average (cv) | 0.37 |  | 1765 |
| H | Deviation | Standard (cv) | 0.48 |  | 1765 |
