# Supplementary material for: Calculation of the Three Partition Coefficients logPow, logKoa and logKaw of Organic Molecules at Standard Conditions at Once by Means of a Generally Applicable Group-Additivity Method
Source: Preprints.org preprint supplement (doi:10.20944/preprints202312.0275.v1), 2023-12-05
Supplement: Supplementary file 11 [file Table 4.doc]

| **Atom type** | C sp3 | C sp3 | C sp3 | C sp3 | C sp2 | O | S4 | Endocycl. Bonds | Const | Sum |
| --- | --- | --- | --- | --- | --- | --- | --- | --- | --- | --- |
| **Neighbors** | H2CO | HC3 | C3Cl | C2Cl2 | C=CCl | CS | O2=O2 | n C-C |  |  |
| **Contribution** | 2.61 | 0.64 | 0.87 | 1.24 | 0.62 | -0.88 | 0.24 | -0.11 | 1.46 |  |
| **n Groups** | 2 | 2 | 2 | 1 | 2 | 2 | 1 | 9 |  |  |
| **n x Contribution** | 5.22 | 1.28 | 1.74 | 1.24 | 1.24 | -1.76 | 0.24 | -0.99 | 1.46 | 9.67 |
