# Supplementary material for: Calculation of the Three Partition Coefficients logPow, logKoa and logKaw of Organic Molecules at Standard Conditions at Once by Means of a Generally Applicable Group-Additivity Method
Source: Preprints.org preprint supplement (doi:10.20944/preprints202312.0275.v1), 2023-12-05
Supplement: Supplementary file 12 [file Table 5.doc]

| **Descriptor** | **2-Nitroaniline** | **3-Nitroaniline** |
| --- | --- | --- |
| logPow | 1.85 (1.70) | 1.37 (1.19) |
| logKoa | 6.46 (5.29) | 7.62 (6.80) |
