# Supplementary material for: Calculation of the Three Partition Coefficients logPow, logKoa and logKaw of Organic Molecules at Standard Conditions at Once by Means of a Generally Applicable Group-Additivity Method
Source: Preprints.org preprint supplement (doi:10.20944/preprints202312.0275.v1), 2023-12-05
Supplement: Supplementary file 13 [file Table 6.doc]

| **Descriptor** | **Hexanoic Acid** | **1,6-Hexanedioic Acid** |
| --- | --- | --- |
| logPow | 1.92 (1.91) | 0.08 (0.64 |
| logKoa | 6.31 (6.23) | 10.74 (10.62) |
