# Supplementary material for: Calculation of the Three Partition Coefficients logPow, logKoa and logKaw of Organic Molecules at Standard Conditions at Once by Means of a Generally Applicable Group-Additivity Method
Source: Preprints.org preprint supplement (doi:10.20944/preprints202312.0275.v1), 2023-12-05
Supplement: Supplementary file 14 [file Table 7.doc]

| **Compound** | **logKaw exp** | **logKaw calc** |
| --- | --- | --- |
| 2-Nitroaniline | -4.77 | -3.59 |
| 3-Nitroaniline | -6.49 | -5.61 |
| Hexanoic Acid | -4.531 | -4.32 |
| 1,6-Hexanedioic Acid | -11.15 | -9.98 |
